# Supplementary material for: Cancer Differentiating Agent Hexamethylene Bisacetamide Inhibits BET Bromodomain Proteins
Source: Oxford University Press journal article supplement (doi:10.1158/0008-5472.can-15-2721), 2016-03-03
Supplement: 00085472can152721-sup-156318_1_supp_3263981_nzbkhv.xlsx [file 00085472can152721-sup-156318_1_supp_3263981_nzbkhv.xlsx]

## Sheet: Sheet1
Supplemental dataset 1: Microarray data used in clustering and GSEA
l820 cells were treated with drugs of indicated concentration for 24 h. RNA was prepared and analyzed by Illumina beadarrays.
Shown are data mean values of biological replicates (n=4 for Control 1 and JQ1, n=2 for the rest)
For clustering, relative expression data (drug/control) were used to normalize data from different chips performed by different operators over a period of one year.
PROBE_ID	SYMBOL	Control 1	JQ1_1 µM	Control 2	HMBA_5mM	Control 3	Vorino_1 µM	Rel JQ1	Rel HMBA	Rel DMSO	Rel Vorinostat	DEFINITION	SYNONYMS
ILMN_2714565	Rrm2	192.288	92.5626	675.387	217.64	301.709	53.5142	0.481373	0.322245	1	0.17737
ILMN_2597255	Cdc6	226.226	115.947	745.434	151.963	330.341	61.7193	0.512529	0.203858	1	0.186835	Mus musculus cell division cycle 6 homolog (S, cerevisiae) (Cdc6), transcript variant 1, mRNA,	CDC18L
ILMN_2605890	Tk1	651.566	254.693	989.823	395.601	804.53	151.818	0.390894	0.399669	1	0.188704	Mus musculus thymidine kinase 1 (Tk1), mRNA,	D530002A18Rik; Tk1a; Tk-1; Tk1b
ILMN_2819319	Rrm2	234.392	135.464	574.367	214.24	289.467	55.2913	0.577937	0.373003	1	0.191011	Mus musculus ribonucleotide reductase M2 (Rrm2), mRNA,	MGC113712; R2; AA407299
ILMN_2595519	Lig1	640.098	385.911	1430.91	620.37	718.889	138.238	0.602893	0.43355	1	0.192293	Mus musculus ligase I, DNA, ATP-dependent (Lig1), transcript variant 2, mRNA,	LigI; AL033288
ILMN_2742849	Mcm5	2343.16	1063.14	4590.27	1936.86	2309.26	445.644	0.453721	0.421949	1	0.192981	Mus musculus minichromosome maintenance deficient 5, cell division cycle 46 (S, cerevisiae) (Mcm5), mRNA,	AL033333; AA617332; P1-CDC46; mCD46; mCDC46; Cdc46; AI324988; Mcmd5
ILMN_2919433	Cdc45l	418.311	261.9	502.708	266.799	428.361	86.0147	0.626089	0.530724	1	0.200799	Mus musculus cell division cycle 45 homolog (S, cerevisiae)-like (Cdc45l), mRNA,
ILMN_2772155	LOC100045780	97.3433	25.2698	226.459	27.7317	277.758	58.7345	0.259595	0.122458	1	0.211459	PREDICTED: Mus musculus similar to metalloprotease-disintegrin meltrin beta (LOC100045780), mRNA,
ILMN_1256883	Rad51	84.07	59.0943	243.635	97.5121	172.099	39.7494	0.702918	0.400239	1	0.230969	Mus musculus RAD51 homolog (S, cerevisiae) (Rad51), mRNA,	Rad51a; Reca; AV304093
ILMN_2893926	Tk1	102.475	49.8226	173.851	91.2025	133.032	31.4673	0.486191	0.524602	1	0.236539	Mus musculus thymidine kinase 1 (Tk1), mRNA,	D530002A18Rik; Tk1a; Tk-1; Tk1b
ILMN_2851040	Mcm3	242.086	94.9182	512.545	167.975	361.882	85.8973	0.392085	0.327728	1	0.237362	Mus musculus minichromosome maintenance deficient 3 (S, cerevisiae) (Mcm3), mRNA,	P1; Mcmd; C80350; p1,m; AL033361
ILMN_1257667	Chaf1a	529.617	355.383	395.006	149.391	402.575	95.7913	0.671018	0.3782	1	0.237946	Mus musculus chromatin assembly factor 1, subunit A (p150) (Chaf1a), mRNA,	AL024058; AL023013; CAF-1; Cac1p
ILMN_2517041	Uhrf1	1766.97	760.697	4050.87	1409.6	1956.3	467.084	0.430508	0.347974	1	0.23876	Mus musculus ubiquitin-like, containing PHD and RING finger domains, 1 (Uhrf1), mRNA,	AL022808; ICBP90; Np95; RNF106
ILMN_2970532	Mcm10	867.007	396.666	1784.45	447.859	854.182	203.98	0.457512	0.250979	1	0.238801	Mus musculus minichromosome maintenance deficient 10 (S, cerevisiae) (Mcm10), mRNA,	C79164; AU018508; C330019M07Rik; 2410041F14Rik
ILMN_2679464	Mcm10	170.208	90.6029	213.008	56.8693	184.344	45.3304	0.532307	0.266982	1	0.245902	Mus musculus minichromosome maintenance deficient 10 (S, cerevisiae) (Mcm10), mRNA,	C79164; AU018508; C330019M07Rik; 2410041F14Rik
ILMN_1223045	2810417H13Rik	537.374	231.725	2126.42	653.307	1040.47	255.853	0.431217	0.307234	1	0.245902	Mus musculus RIKEN cDNA 2810417H13 gene (2810417H13Rik), mRNA,	MGC29306; Ns5apt9; p15(PAF); Ns5atp9; mKIAA0101; AA409629
ILMN_2936427	Mcm4	2051.96	907.686	4757.87	2285.94	2671.73	666.942	0.442351	0.480455	1	0.249629	Mus musculus minichromosome maintenance deficient 4 homolog (S, cerevisiae) (Mcm4), mRNA,	mcdc21; KIAA4003; AI325074; 19G; Mcmd4; Cdc21; mKIAA4003; AU045576
ILMN_2673889	Mcm7	123.99	102.191	447.091	214.039	234.781	58.9295	0.824187	0.478737	1	0.250997
ILMN_2929896	Pbk	1474.48	752.2	2932.9	1192.9	1839.85	463.762	0.510146	0.406732	1	0.252066	Mus musculus PDZ binding kinase (Pbk), mRNA,	2810434B10Rik; D14Ertd732e; TOPK; AW538537
ILMN_2615709	Spc24	168.756	88.9805	150.551	100.443	206.71	54.3582	0.527272	0.667172	1	0.262969	Mus musculus SPC24, NDC80 kinetochore complex component, homolog (S, cerevisiae) (Spc24), mRNA,	Spbc24; 2410030K01Rik; AV109292
ILMN_2657356	Lig1	86.7677	58.0838	192.574	84.5105	133.365	35.8302	0.669417	0.438847	1	0.268663	Mus musculus ligase I, DNA, ATP-dependent (Lig1), transcript variant 2, mRNA,	LigI; AL033288
ILMN_2623056	Clspn	403.358	253.773	818.551	343.558	428.388	115.42	0.629151	0.419715	1	0.269428	Mus musculus claspin homolog (Xenopus laevis) (Clspn), mRNA,	E130314M08Rik; C85083; CLASPIN; B130025E01
ILMN_1241320	Clspn	341.7	278.91	146.759	62.8768	124.744	34.4733	0.816243	0.428435	1	0.276353	Mus musculus claspin homolog (Xenopus laevis) (Clspn), mRNA,	E130314M08Rik; C85083; CLASPIN; B130025E01
ILMN_2999654	Psmc3ip	377.465	186.917	507.25	198.197	340.659	94.1591	0.495191	0.390728	1	0.276403	Mus musculus proteasome (prosome, macropain) 26S subunit, ATPase 3, interacting protein (Psmc3ip), mRNA,	HOP2; Tbpip; C79099
ILMN_2921303	Tyms-ps	373.012	265.73	395.241	263.342	376.54	104.749	0.712391	0.666284	1	0.27819	Mus musculus thymidylate synthase, pseudogene (Tyms-ps), non-coding RNA,
ILMN_2617468	Chac1	66.304	80.5432	51.2865	38.8932	95.2111	27.048	1.21476	0.758351	1	0.284084	Mus musculus ChaC, cation transport regulator-like 1 (E, coli) (Chac1), mRNA,	1810008K03Rik
ILMN_2821788	Cenpi	122.116	81.0017	325.528	142.691	165.416	48.0477	0.663316	0.438337	1	0.290466	Mus musculus centromere protein I (Cenpi), mRNA,	AI504163; Fshprh1; MGC40943
ILMN_2858359	Clspn	519.996	333.121	974.928	426.748	530.718	154.901	0.640622	0.437723	1	0.291871	Mus musculus claspin homolog (Xenopus laevis) (Clspn), mRNA,	E130314M08Rik; C85083; CLASPIN; B130025E01
ILMN_2627660	Lig1	168.648	130.388	93.8841	75.1644	160.928	47.1277	0.773137	0.800609	1	0.292851	Mus musculus ligase I, DNA, ATP-dependent (Lig1), transcript variant 2, mRNA,	LigI; AL033288
ILMN_2787871	Cdca5	231.707	126.179	484.925	208.068	250.575	74.1588	0.544564	0.429074	1	0.295954	Mus musculus cell division cycle associated 5 (Cdca5), mRNA,	AL024086; 2610036L13Rik; C85404; AW536684
ILMN_2908070	Gtse1	311.996	191.378	633.331	367.905	389.462	115.463	0.613398	0.580906	1	0.296467	Mus musculus G two S phase expressed protein 1 (Gtse1), mRNA,	Gtse-1; B99
ILMN_2981801	Hist1h2ag	1818.36	2380.86	490.654	482.332	1724.47	513.539	1.30934	0.983039	1	0.297795	Mus musculus histone cluster 1, H2ag (Hist1h2ag), mRNA,
ILMN_2789047	1110001A07Rik	127.396	86.7402	240.763	158.475	186.614	55.687	0.68087	0.658217	1	0.298407	Mus musculus RIKEN cDNA 1110001A07 gene (1110001A07Rik), mRNA,	C78640; MGC151378
ILMN_2881050	Rad51	144.632	84.1958	628.995	221.771	212.419	63.6117	0.58214	0.35258	1	0.299463	Mus musculus RAD51 homolog (S, cerevisiae) (Rad51), mRNA,	Rad51a; Reca; AV304093
ILMN_3161959	E130016E03Rik	371.081	611.78	544.582	517.976	416.534	126.834	1.64864	0.951145	1	0.304498	Mus musculus RIKEN cDNA E130016E03 gene (E130016E03Rik), mRNA,	Rad54b; Fsbp; MGC67261
ILMN_1236539	Pfkl	1203.25	1480.47	2354.42	2609.57	2205.88	674.305	1.23039	1.10837	1	0.305686	Mus musculus phosphofructokinase, liver, B-type (Pfkl), mRNA,	AA407869
ILMN_2834065	Esco2	215.115	180.729	850.25	398.785	381.301	116.734	0.840149	0.469021	1	0.306146	Mus musculus establishment of cohesion 1 homolog 2 (S, cerevisiae) (Esco2), mRNA,	D030072L07Rik; 2410004I17Rik
ILMN_2977624	Rrm1	1152.4	580.778	1307.62	651.342	904.766	277.193	0.503975	0.498114	1	0.30637	Mus musculus ribonucleotide reductase M1 (Rrm1), mRNA,	RnrM1
ILMN_2847144	Hist1h2ak	9296.45	10619.1	2891.72	3494.75	10330.4	3181.21	1.14228	1.20854	1	0.307948	Mus musculus histone cluster 1, H2ak (Hist1h2ak), mRNA,
ILMN_2741985	Rad54l	404.838	341.939	470.351	232.447	386.651	119.755	0.844633	0.494198	1	0.309723	Mus musculus RAD54 like (S, cerevisiae) (Rad54l), mRNA,	RAD54
ILMN_3161813	Tube1	91.7616	74.0049	165.786	101.358	125.607	38.9484	0.806491	0.611376	1	0.310082	Mus musculus epsilon-tubulin 1 (Tube1), mRNA,	2310061K05Rik; Tube; AI551343
ILMN_2785454	Hist2h2ab	1220.06	1741.33	261.168	315.44	1095.02	340.339	1.42725	1.2078	1	0.310807	Mus musculus histone cluster 2, H2ab (Hist2h2ab), mRNA,	H2a-613a; EG621893
ILMN_2595597	Anln	373.611	308.961	882.937	612.452	548.138	171.862	0.826958	0.693653	1	0.313537	Mus musculus anillin, actin binding protein (Anln), mRNA,	2900037I21Rik; Scraps; ANILLIN; C78101; 1110037A17Rik
ILMN_1231138	E2f1	476.676	369.468	813.656	409.059	424.37	133.09	0.775093	0.502741	1	0.313618	Mus musculus E2F transcription factor 1 (E2f1), mRNA,	mKIAA4009; E2F-1; KIAA4009
ILMN_2484707	Tyms	421.888	317.045	774.625	517.099	735.539	232.908	0.75149	0.667548	1	0.31665	Mus musculus thymidylate synthase (Tyms), mRNA,	TS
ILMN_3097131	Timeless	302.098	191.95	688.437	288.882	290.298	92.267	0.635388	0.419621	1	0.317835	Mus musculus timeless homolog (Drosophila) (Timeless), transcript variant 2, mRNA,	tim; C77407; Debt69
ILMN_2854962	Sgol1	231.849	162.046	590.474	287.853	282.052	90.2174	0.698926	0.487495	1	0.319861	Mus musculus shugoshin-like 1 (S, pombe) (Sgol1), mRNA,	C81037; MGC113769; 3300001M08Rik; Sgo1
ILMN_2851251	Hn1l	183.825	121.584	516.825	221.958	244.195	78.6173	0.661411	0.429464	1	0.321945	Mus musculus hematological and neurological expressed 1-like (Hn1l), mRNA,	2810430B18Rik; AL022629; C16orf34; D17Ertd441e
ILMN_2602687	Rpa2	254.549	152.085	768.253	352.542	370.068	120.34	0.597469	0.458888	1	0.325184	Mus musculus replication protein A2 (Rpa2), mRNA,	AI325195; AA409079; AU020965; Rf-A2
ILMN_2730329	Hist1h2ah	8460.65	9818.13	2304.42	2861.84	9097.89	2965.9	1.16045	1.24189	1	0.325998	Mus musculus histone cluster 1, H2ah (Hist1h2ah), mRNA,	RP23-9O16,9
ILMN_2826881	Mybl2	163.356	84.5416	336.668	102.294	179.833	58.7946	0.517528	0.303842	1	0.32694	Mus musculus myeloblastosis oncogene-like 2 (Mybl2), mRNA,	Bmyb
ILMN_1245789	Ccne2	88.2984	63.5277	650.165	262.838	252.149	82.6444	0.719466	0.404263	1	0.327761	Mus musculus cyclin E2 (Ccne2), transcript variant 1, mRNA,
ILMN_1232175	Chtf18	342.092	343.212	196.674	113.939	201.607	66.1187	1.00328	0.579327	1	0.327959	Mus musculus CTF18, chromosome transmission fidelity factor 18 homolog (S, cerevisiae) (Chtf18), mRNA,	Chl12; 6030457M03Rik; MGC38008
ILMN_2684986	Hnrph1	74.4493	66.9984	373.63	297.111	189.608	62.4498	0.89992	0.7952	1	0.329363
ILMN_2595857	Ankrd37	77.1123	86.2742	296.867	152.109	523.929	174.698	1.11881	0.512379	1	0.333439	Mus musculus ankyrin repeat domain 37 (Ankrd37), mRNA,
ILMN_2655577	Pold1	1575.51	1057.39	1974.09	964.783	1468.87	492.445	0.671146	0.488724	1	0.335256	Mus musculus polymerase (DNA directed), delta 1, catalytic subunit (Pold1), mRNA,	125kDa
ILMN_2730249	2310005N01Rik	74.3466	76.8679	86.6413	82.1084	69.059	23.2457	1.03391	0.947682	1	0.336607	Mus musculus RIKEN cDNA 2310005N01 gene (2310005N01Rik), mRNA,	2810036M01Rik
ILMN_2900557	Kif15	397.695	386.727	578.732	498.284	481.752	162.215	0.972421	0.860992	1	0.33672	Mus musculus kinesin family member 15 (Kif15), mRNA,	Knsl7; D330038N01; 3930402I10Rik; HKLP2; 3110023M17Rik
ILMN_2632153	Cdca2	900.329	824.964	1517.27	1077.34	983.536	331.848	0.916292	0.710053	1	0.337403	Mus musculus cell division cycle associated 2 (Cdca2), mRNA,	2610311M19Rik; AI586158
ILMN_2534259	LOC237877	159.089	106.91	340.833	160.59	290.161	98.5556	0.672011	0.471168	1	0.339659
ILMN_2730463	Cdt1	773.627	496.401	2387.75	1143.72	1110.55	378.868	0.641654	0.478995	1	0.341153	Mus musculus chromatin licensing and DNA replication factor 1 (Cdt1), mRNA,	AW545653; 2610318F11Rik; Ris2; C76791
ILMN_2606693	Insig1	64.9781	100.346	309.599	318.392	161.615	55.1366	1.54431	1.0284	1	0.341161	Mus musculus insulin induced gene 1 (Insig1), mRNA,	1810013C12Rik; Insig-1
ILMN_2720995	Pold3	287.982	216.591	497.088	241.282	349.957	119.808	0.752099	0.485391	1	0.342349	Mus musculus polymerase (DNA-directed), delta 3, accessory subunit (Pold3), mRNA,	C85233; P66; 2410142G14Rik; P68
ILMN_2788673	Pgm2	200.45	206.582	797.311	834.236	500.467	171.559	1.03059	1.04631	1	0.342798	Mus musculus phosphoglucomutase 2 (Pgm2), mRNA,	Pgm1; Pgm-2; 2610020G18Rik; AI098105; AA407108
ILMN_2684987	Hnrnph1	89.2285	71.5797	495.333	332.268	247.34	85.1663	0.802206	0.670798	1	0.344329	Mus musculus heterogeneous nuclear ribonucleoprotein H1 (Hnrnph1), mRNA,	Hnrnph; AI642080; E430005G16Rik
ILMN_2989480	Dsn1	81.529	94.1612	216.308	132.041	119.129	41.0332	1.15494	0.61043	1	0.344445	Mus musculus DSN1, MIND kinetochore complex component, homolog (S, cerevisiae) (Dsn1), mRNA,	1700022L09Rik; AW552447
ILMN_2674228	0610010K14Rik	158.756	155.539	122.085	132.934	173.669	59.8379	0.979738	1.08886	1	0.344552	Mus musculus RIKEN cDNA 0610010K14 gene (0610010K14Rik), mRNA,	AL033328; RP23-198E14,7; AU045833; 1110020A23Rik
ILMN_2677595	Ncapg2	81.5528	55.2271	113.741	53.2461	70.2892	24.2237	0.677195	0.468135	1	0.344629	Mus musculus non-SMC condensin II complex, subunit G2 (Ncapg2), mRNA, XM_001003862 XM_001003868 XM_001003871 XM_001003875	Luzp5; 5830426I05Rik; Mtb; mCAP-G2
ILMN_1250907	Mcm2	833.71	324.788	1054.9	330.088	719.55	248.658	0.389569	0.312908	1	0.345574	Mus musculus minichromosome maintenance deficient 2 mitotin (S, cerevisiae) (Mcm2), mRNA,	CDCL1; Mcmd2; BM28; AA959861; mKIAA0030; AW476101
ILMN_1237993	Nasp	993.281	751.635	1742.37	1386.15	765.842	265.345	0.75672	0.795554	1	0.346474	Mus musculus nuclear autoantigenic sperm protein (histone-binding) (Nasp), transcript variant 2, mRNA,	5033430J04Rik; AI317140; AI131596; D4Ertd767e; Epcs32
ILMN_2654952	LOC100040592	1472.07	1421.22	4874.88	5477.69	2996.05	1040.32	0.965459	1.12366	1	0.347229	PREDICTED: Mus musculus similar to Hmgcs1 protein, transcript variant 1 (LOC100040592), mRNA,
ILMN_2994354	6720460F02Rik	80.5067	62.5745	119.161	65.6152	94.0465	32.7083	0.777258	0.550645	1	0.347789	Mus musculus RIKEN cDNA 6720460F02 gene (6720460F02Rik), mRNA,	2610008F03Rik; RP23-207N15,1; AI115087
ILMN_2600004	Plk4	66.3893	52.1647	418.655	195.278	141.112	49.3272	0.785739	0.466441	1	0.349561
ILMN_2598548	Pole	241.458	192.716	321.588	136.369	235.365	82.3859	0.798134	0.424048	1	0.350034	Mus musculus polymerase (DNA directed), epsilon (Pole), mRNA,
ILMN_3055904	Cbx5	510.459	492.589	319.122	271.301	277.377	97.2051	0.964993	0.850148	1	0.350445	Mus musculus chromobox homolog 5 (Drosophila HP1a) (Cbx5), transcript variant 2, mRNA,	C75991; 2610029O15Rik; Hp1a; HP1
ILMN_2614161	Lss	127.415	95.4364	245.177	146.161	155.5	54.6925	0.749021	0.596143	1	0.35172	Mus musculus lanosterol synthase (Lss), mRNA,	2810025N20Rik; BC029082; MGC27893; D10Ertd116e
ILMN_1242979	Atp4a	48.6598	35.5625	95.8588	45.6158	78.9825	27.8871	0.730838	0.475865	1	0.353079	Mus musculus ATPase, H+/K+ exchanging, gastric, alpha polypeptide (Atp4a), mRNA,
ILMN_3160369	Atg9b	184.443	45.2475	503.724	77.9039	347.706	122.799	0.245319	0.154656	1	0.353167	Mus musculus ATG9 autophagy related 9 homolog B (S, cerevisiae) (Atg9b), mRNA,	Apg9l2; Nos3as; Apg912; sONE; eONE; Apgdc2; Gm574
ILMN_2657844	Cdc2a	517.187	312.737	1071.62	636.702	754.235	267.832	0.604688	0.594152	1	0.355104	Mus musculus cell division cycle 2 homolog A (S, pombe) (Cdc2a), mRNA,	Cdc2; p34<CDC2>; CDK1
ILMN_2618014	Siah1b	212.36	129.687	570.843	182.026	216.157	76.8315	0.610694	0.318872	1	0.355443	Mus musculus seven in absentia 1B (Siah1b), mRNA,	AA960570; Sinh1b
ILMN_2983714	Apitd1	357.87	179.765	332.24	133.175	261.094	92.9111	0.502319	0.40084	1	0.355854	Mus musculus apoptosis-inducing, TAF9-like domain 1 (Apitd1), mRNA,	MGC58422; 2610040C18Rik; 2810407L01Rik
ILMN_2960325	Ctse	373.949	127.891	559.437	336.281	226.946	80.9881	0.342002	0.601107	1	0.35686	Mus musculus cathepsin E (Ctse), mRNA,	A430072O03Rik; C920004C08Rik; CE; CatE
ILMN_2601840	Phf19	142.288	57.4765	129.528	50.8043	123.069	43.9619	0.403946	0.392226	1	0.357214	Mus musculus PHD finger protein 19 (Phf19), mRNA,	3110009G19Rik; 3321402G02Rik
ILMN_3156604	Hmgb2	1670.23	1129.45	3495.73	3177.04	2122.64	762.139	0.676222	0.908834	1	0.359053	Mus musculus high mobility group box 2 (Hmgb2), mRNA,	C80539; MGC103184; Hmg2; HMG-2
ILMN_1258159	Slc2a1	197.67	245.836	799.264	731.535	602.997	216.709	1.24367	0.91526	1	0.359387	Mus musculus solute carrier family 2 (facilitated glucose transporter), member 1 (Slc2a1), mRNA,	Glut-1; Glut1
ILMN_1243593	Pcgf5	189.101	233.966	379.204	370.592	226.26	81.3645	1.23726	0.977288	1	0.359607	Mus musculus polycomb group ring finger 5 (Pcgf5), mRNA,	5830406C17Rik; AI324127; 9530023M17Rik; 0610009F02Rik; 1110054A01Rik; 5830443C21Rik
ILMN_1250942	Cdk2	47.7539	38.9197	205.758	125.157	127.047	45.6895	0.815007	0.608273	1	0.359628	Mus musculus cyclin-dependent kinase 2 (Cdk2), transcript variant 1, mRNA,	A630093N05Rik
ILMN_1255053	Plk1	947.287	560.956	2585.05	2108.02	1121.2	404.839	0.592172	0.815468	1	0.361077	Mus musculus polo-like kinase 1 (Drosophila) (Plk1), mRNA,	Plk; STPK13
ILMN_2753226	Rad51ap1	101.132	81.8181	175.807	112.583	151.949	54.9737	0.809019	0.64038	1	0.36179
ILMN_2724303	Dtl	34.5983	30.9528	82.7527	45.5251	54.945	19.9102	0.894632	0.550134	1	0.362365	Mus musculus denticleless homolog (Drosophila) (Dtl), mRNA,	Ramp; 5730564G15Rik; 2810047L02Rik
ILMN_2451022	Vim	234.931	160.155	768.3	681.404	488.484	177.679	0.681712	0.886899	1	0.363736	Mus musculus vimentin (Vim), mRNA,	MGC102095
ILMN_1223979	Cenpn	174.996	169.607	280.399	132.77	200.472	73.0125	0.969206	0.473503	1	0.364204	Mus musculus centromere protein N (Cenpn), mRNA,	2610510J17Rik; AI426416; AW545024
ILMN_1245272	Insig1	74.6265	109.799	300.235	330.879	171.666	62.7075	1.47131	1.10207	1	0.365288	Mus musculus insulin induced gene 1 (Insig1), mRNA,	1810013C12Rik; Insig-1
ILMN_2897468	2610510J17Rik	364.577	330.354	582.955	323.137	393.996	144.498	0.906129	0.554308	1	0.36675	Mus musculus RIKEN cDNA 2610510J17 gene (2610510J17Rik), mRNA,	AI426416; AW545024
ILMN_2711112	Shcbp1	71.483	59.9165	404.618	312.096	187.275	68.7141	0.838192	0.771336	1	0.366916	Mus musculus Shc SH2-domain binding protein 1 (Shcbp1), mRNA,	mPAL
ILMN_2637203	Rfc5	307.113	259.019	517.996	427.178	343.649	126.147	0.843402	0.824673	1	0.36708	Mus musculus replication factor C (activator 1) 5 (Rfc5), mRNA,	Recc5; 36kDa; MGC113787; 36,5kDa; 2610020K06Rik; 2610209F07Rik
ILMN_1214126	Hes6	164.802	79.4241	380.599	127.411	314.702	116.069	0.481937	0.334763	1	0.368822	Mus musculus hairy and enhancer of split 6 (Drosophila) (Hes6), mRNA,	AI326893
ILMN_1229840	Fcrla	288.448	25.1512	555.206	43.3487	602.148	222.577	0.087195	0.0780768	1	0.369638	Mus musculus Fc receptor-like A (Fcrla), mRNA,	mFREB; FREB; Freb1; Fcrlm1; FCRL1; Fcrx; mFcrX; BB219290; FCRL
ILMN_2648080	Kntc1	261.718	225.83	322.436	181.584	213.165	78.8503	0.862875	0.563163	1	0.369903	Mus musculus kinetochore associated 1 (Kntc1), mRNA,	D330012D13
ILMN_2830661	Top2a	855.099	663.56	1278.69	1089.86	1174.01	434.348	0.776004	0.852323	1	0.369969	Mus musculus topoisomerase (DNA) II alpha (Top2a), mRNA,	Top-2
ILMN_2629581	Cox6a2	94.794	46.7292	59.9288	31.9498	63.7435	23.6145	0.492956	0.533129	1	0.370462	Mus musculus cytochrome c oxidase, subunit VI a, polypeptide 2 (Cox6a2), nuclear gene encoding mitochondrial protein, mRNA,	VIaH; COXVIaH
ILMN_1258242	2310031L18Rik	66.1301	93.8758	112.492	78.8579	81.2154	30.1198	1.41956	0.701009	1	0.370864
ILMN_2866970	Kif11	293.214	268.564	322	240.334	380.472	141.301	0.915931	0.746379	1	0.371383	Mus musculus kinesin family member 11 (Kif11), mRNA,	Eg5; Kifl1; Knsl1; Kif8
ILMN_2773110	Cdc25a	510.272	266.074	596.318	135.368	309.75	115.365	0.521435	0.227007	1	0.372444	Mus musculus cell division cycle 25 homolog A (S, pombe) (Cdc25a), mRNA,	D9Ertd393e
ILMN_2683190	Orc6l	696.778	540.574	1601.75	806.221	825.119	307.608	0.775819	0.503337	1	0.372804	Mus musculus origin recognition complex, subunit 6-like (S, cerevisiae) (Orc6l), mRNA,	6720420I10Rik; Orc6; MGC91038
ILMN_2778872	Mad2l1	592.235	377.249	1624.28	946.394	801.002	299.157	0.636992	0.582654	1	0.373478	Mus musculus MAD2 (mitotic arrest deficient, homolog)-like 1 (yeast) (Mad2l1), mRNA,	MAD2; MGC113763; AA673185
ILMN_2952661	Dbf4	524.32	351.407	1457.25	711.867	560.93	210.861	0.670215	0.4885	1	0.375913	Mus musculus DBF4 homolog (S, cerevisiae) (Dbf4), mRNA,	AA545217; Ask
ILMN_1238109	Pp11r	66.4882	24.7387	67.6108	26.9184	146.683	55.2184	0.372076	0.398137	1	0.376446	Mus musculus placental protein 11 related (Pp11r), mRNA,	Tcl-30
ILMN_2663604	Fignl1	293.627	217.518	872.066	470.818	395.603	149.298	0.740795	0.539888	1	0.377392	Mus musculus fidgetin-like 1 (Fignl1), mRNA,
ILMN_2883414	Cenpl	336.79	241.912	676.638	447.141	361.466	136.995	0.718287	0.660828	1	0.379	Mus musculus centromere protein L (Cenpl), mRNA,	2610300B10Rik; AW550697; AW121806
ILMN_2445324	LOC100047651	1823.32	831.003	3509.59	1094.13	1645.8	623.769	0.455765	0.311753	1	0.379006	PREDICTED: Mus musculus similar to FOG (LOC100047651), mRNA,
ILMN_1231447	Tpi1	52.4667	33.5018	160.449	140.537	122.053	46.3383	0.638534	0.875897	1	0.379658	Mus musculus triosephosphate isomerase 1 (Tpi1), mRNA,	Tpi; Tpi-1; AI255506
ILMN_2908065	Gtse1	115.874	86.9067	109.857	59.2399	108.394	41.2026	0.750009	0.539248	1	0.38012	Mus musculus G two S phase expressed protein 1 (Gtse1), mRNA,	Gtse-1; B99
ILMN_2795040	Hist1h2ad	8722.95	10447.1	3703.72	4600.58	9388.14	3571.29	1.19765	1.24215	1	0.380404	Mus musculus histone cluster 1, H2ad (Hist1h2ad), mRNA,
ILMN_2428388	Wdr76	247.288	126.758	643.477	241.041	377.157	143.846	0.512594	0.374592	1	0.381395	Mus musculus WD repeat domain 76 (Wdr76), mRNA,	5830411K18Rik; AA517836; 6030457D09
ILMN_1231885	Ckap2l	57.082	54.8978	157.616	132.209	121.715	46.4435	0.961735	0.838803	1	0.381577	Mus musculus cytoskeleton associated protein 2-like (Ckap2l), mRNA,	2610318C08Rik; AV070319; 2010016H04Rik
ILMN_2823778	Sc4mol	258.214	164.843	1283.45	1237	391.881	149.625	0.638398	0.963807	1	0.381814	Mus musculus sterol-C4-methyl oxidase-like (Sc4mol), mRNA,	C78600; ERG25; 1500001G16Rik; DESP4
ILMN_2770723	Ncapg2	51.1816	44.1485	260.048	130.576	89.0602	34.0344	0.862585	0.502123	1	0.38215	Mus musculus non-SMC condensin II complex, subunit G2 (Ncapg2), mRNA, XM_001003862 XM_001003868 XM_001003871 XM_001003875	Luzp5; 5830426I05Rik; Mtb; mCAP-G2
ILMN_2935838	F730047E07Rik	119.248	80.4926	149.057	81.5817	114.579	43.8043	0.675003	0.547319	1	0.382307	Mus musculus RIKEN cDNA F730047E07 gene (F730047E07Rik), mRNA,	Gm134
ILMN_2950622	Arhgdig	310.606	56.8252	458.834	66.5042	207.855	79.4892	0.182949	0.144941	1	0.382426	Mus musculus Rho GDP dissociation inhibitor (GDI) gamma (Arhgdig), mRNA,	Rho-GDI-3; Gdi5; RIP2; Rho-GDI2
ILMN_2688306	Rbl1	84.8568	70.1829	253.242	175.826	154.785	59.3253	0.827075	0.694301	1	0.383275	Mus musculus retinoblastoma-like 1 (p107) (Rbl1), mRNA,	p107; PRB1; AW547426
ILMN_2891104	Tmco4	136.876	51.2425	177.99	51.4422	103.578	40.0148	0.374372	0.289017	1	0.386325	Mus musculus transmembrane and coiled-coil domains 4 (Tmco4), mRNA,	4632413C14Rik; AI430825
ILMN_1219275	Rbbp7	254.959	159.24	1652.4	1294.75	953.403	368.804	0.624572	0.783561	1	0.386829	Mus musculus retinoblastoma binding protein 7 (Rbbp7), mRNA,	mRbAp46; AI173248; AU019541; BB114024; AA409861
ILMN_2756008	Nasp	742.588	431.291	1962.23	1280.53	749.689	290.589	0.580795	0.652588	1	0.387613
ILMN_1225730	Fdps	1182.72	629.577	1953.71	1061.91	1652.69	640.843	0.532315	0.543534	1	0.387758	Mus musculus farnesyl diphosphate synthetase (Fdps), mRNA,	6030492I17Rik; AI256750; mKIAA1293; MGC107162; Fdpsl1
ILMN_2471359	Tmpo	182.397	120.499	920.626	505.554	392.072	152.116	0.660641	0.549141	1	0.38798	Mus musculus thymopoietin (Tmpo), transcript variant 6, mRNA,	5630400D24Rik; TP; AI195756; AI606875; AW214352; AW547477; LAP2
ILMN_3009652	Chek1	34.1092	28.6328	73.9455	40.2054	60.3015	23.4013	0.839445	0.543717	1	0.388071	Mus musculus checkpoint kinase 1 homolog (S, pombe) (Chek1), mRNA,	rad27; Chk1; C85740
ILMN_2770759	Cdk2	110.264	82.243	366.737	209.937	235.501	91.4004	0.745874	0.572445	1	0.38811	Mus musculus cyclin-dependent kinase 2 (Cdk2), transcript variant 1, mRNA,	A630093N05Rik
ILMN_1220039	Kif4	248.088	227.144	315.452	221.037	225.892	87.9101	0.915577	0.7007	1	0.389169	Mus musculus kinesin family member 4 (Kif4), mRNA,	Kns4; D330050K22Rik; AI323435
ILMN_2633697	Skp2	43.3437	35.262	149.709	98.833	95.6027	37.3696	0.813543	0.660169	1	0.390885	Mus musculus S-phase kinase-associated protein 2 (p45) (Skp2), transcript variant 2, mRNA,	FBXL1; MGC102075; MGC116668
ILMN_2608043	Hes6	227.193	99.8184	465.586	180.243	393.286	153.873	0.439355	0.387132	1	0.39125	Mus musculus hairy and enhancer of split 6 (Drosophila) (Hes6), mRNA,	AI326893
ILMN_2865912	F630043A04Rik	211.772	139.24	459.287	237.876	242.134	94.8006	0.657501	0.517924	1	0.391521	Mus musculus RIKEN cDNA F630043A04 gene (F630043A04Rik), mRNA,
ILMN_2612044	D14Ertd500e	214.068	178.938	303.532	232.521	224.696	88.4773	0.835893	0.766051	1	0.393765	Mus musculus DNA segment, Chr 14, ERATO Doi 500, expressed (D14Ertd500e), mRNA,	AU016300; 9430093H08Rik
ILMN_1220793	Rbm4b	125.913	145.946	251.493	441.73	177.34	69.8611	1.1591	1.75643	1	0.393939	Mus musculus RNA binding motif protein 4B (Rbm4b), mRNA,	4921506I22Rik; AI504630; AI506404; Lark2; MGC115931
ILMN_1247173	Tyms	101.877	70.5172	181.239	117.048	136.604	53.9304	0.69218	0.645819	1	0.394793	Mus musculus thymidylate synthase (Tyms), mRNA,	TS
ILMN_1249378	Bhlhb2	32.0763	41.5795	95.44	132.506	103.343	40.8702	1.29627	1.38837	1	0.395482	Mus musculus basic helix-loop-helix domain containing, class B2 (Bhlhb2), mRNA,	Clast5; Stra14; Dec1; Stra13; C130042M06Rik; CR8; Sharp2
ILMN_1232341	A730008H23Rik	80.105	83.1705	171.08	102.844	152.779	60.706	1.03827	0.601147	1	0.397346	Mus musculus RIKEN cDNA A730008H23 gene (A730008H23Rik), mRNA,	MGC117857
ILMN_1215898	Hirip3	1224.99	633.646	1798.62	614.421	910.122	363.177	0.517265	0.341608	1	0.399042	Mus musculus HIRA interacting protein 3 (Hirip3), mRNA,	C86302; B130036O03
ILMN_2791952	Hes6	979.712	439.819	1083.97	336.533	840.787	336.113	0.448927	0.310464	1	0.39976	Mus musculus hairy and enhancer of split 6 (Drosophila) (Hes6), mRNA,	AI326893
ILMN_1227664	Dck	66.8118	61.4596	198.825	135.998	153.028	61.1839	0.919891	0.684011	1	0.399822	Mus musculus deoxycytidine kinase (Dck), mRNA,
ILMN_3161617	Fancd2	212.4	134.551	247.941	134.183	219.003	87.9403	0.633479	0.541191	1	0.401548	Mus musculus Fanconi anemia, complementation group D2 (Fancd2), mRNA, XM_899748 XM_899764 XM_899772 XM_899780 XM_899788 XM_917138 XM_924688 XM_924694 XM_924701 XM_924706 XM_924709 XM_924714 XM_924717 XM_924719 XM_924720	FACD; FA-D2; FA4; FANCD; FAD; AU015151; 2410150O07Rik; BB137857
ILMN_2713071	Fads2	30.8091	33.8791	60.5888	31.9671	52.551	21.1228	1.09965	0.527608	1	0.401949
ILMN_1253008	Acat2	229.725	233.814	429.208	429.902	284.682	114.653	1.0178	1.00162	1	0.402741	Mus musculus acetyl-Coenzyme A acetyltransferase 2 (Acat2), mRNA,	AW742799; Tcp1-rs1; Tcp-1x
ILMN_1224894	Mtbp	44.9699	38.4391	131.233	80.0747	91.7615	36.9843	0.854773	0.610174	1	0.403048	Mus musculus Mdm2, transformed 3T3 cell double minute p53 binding protein (Mtbp), mRNA,	MDM2BP; AI429604
ILMN_2755434	2310031L18Rik	72.4731	105.988	137.64	93.8774	75.3969	30.4053	1.46244	0.682052	1	0.40327
ILMN_3096750	Seh1l	164.067	124.572	621.773	446.429	206.267	83.3624	0.759273	0.717994	1	0.404148	Mus musculus SEH1-like (S, cerevisiae (Seh1l), transcript variant 1, mRNA,	Seh1; SEH1A; SEH1B; 2610007A16Rik; SEC13L; AW540070
ILMN_3011719	6430706D22Rik	1212.83	1662.39	2247.15	1896.39	1577.11	640.521	1.37068	0.84391	1	0.406136	Mus musculus RIKEN cDNA 6430706D22 gene (6430706D22Rik), mRNA,	Gm975; mfleg1; MGC66590
ILMN_2589667	Cpeb2	97.0035	95.1605	128.867	59.8755	54.4193	22.1425	0.981001	0.464632	1	0.406887	Mus musculus cytoplasmic polyadenylation element binding protein 2 (Cpeb2), mRNA,	A630055H10Rik
ILMN_3150996	Blm	418.718	309.42	704.16	313.34	341.58	139.013	0.738969	0.444984	1	0.406972	Mus musculus Bloom syndrome homolog (human) (Blm), transcript variant 2, mRNA,
ILMN_2691192	Rbbp7	300.33	186.725	1976.79	1598.32	1103.01	451.248	0.621732	0.808543	1	0.409107	Mus musculus retinoblastoma binding protein 7 (Rbbp7), mRNA,	mRbAp46; AI173248; AU019541; BB114024; AA409861
ILMN_2614304	Pola2	558.709	357.08	807.581	313.822	486.888	199.483	0.639116	0.388596	1	0.409709	Mus musculus polymerase (DNA directed), alpha 2 (Pola2), mRNA,	AI573378
ILMN_1231514	Nfkbil2	113.828	99.2844	88.155	56.2186	83.3435	34.2024	0.87223	0.637725	1	0.410379	Mus musculus nuclear factor of kappa light polypeptide gene enhancer in B-cells inhibitor-like 2 (Nfkbil2), mRNA,	2810439M11Rik
ILMN_1248830	Hist1h2an	6203.86	7963.67	2655.16	3406.93	6919.06	2849.99	1.28367	1.28313	1	0.411905	Mus musculus histone cluster 1, H2an (Hist1h2an), mRNA,
ILMN_1213809	Gpr18	41.9687	25.2072	69.4316	24.4816	52.0282	21.4734	0.60062	0.352601	1	0.412727	Mus musculus G protein-coupled receptor 18 (Gpr18), mRNA,
ILMN_2637704	Cdc25c	96.1143	98.3697	100.703	100.832	83.2503	34.413	1.02347	1.00128	1	0.413367
ILMN_2508745	Zfyve21	706.903	343.893	944.379	565.512	903.542	373.829	0.486479	0.598818	1	0.413737	Mus musculus zinc finger, FYVE domain containing 21 (Zfyve21), mRNA,	C85416; AW558780; 1110013H04Rik
ILMN_2676726	Cenpl	320.037	278.043	755.03	575.897	441.508	182.941	0.868782	0.762747	1	0.414355	Mus musculus centromere protein L (Cenpl), mRNA,	2610300B10Rik; AW550697; AW121806
ILMN_2617228	Aurka	354.422	235.234	688.917	404.351	358.63	148.972	0.663713	0.586938	1	0.415392	Mus musculus aurora kinase A (Aurka), mRNA,	Aurora-A; AU019385; Stk6; AW539821; Ark1; Ayk1; IAK; AIRK1
ILMN_2756460	Frap1	376.56	176.299	165.811	105.454	447.996	186.5	0.468183	0.635985	1	0.416298	Mus musculus FK506 binding protein 12-rapamycin associated protein 1 (Frap1), mRNA,	RAPT1; 2610315D21Rik; MGC118056; FRAP; AI327068; mTOR; FRAP2; RAFT1; flat
ILMN_2762326	Kif22	1122.73	823.317	1708.96	859.072	1058.81	441.057	0.733319	0.502687	1	0.416561	Mus musculus kinesin family member 22 (Kif22), mRNA,	AU021460; C81217; Kif22a; Kid
ILMN_2756041	Pkm2	4175.59	4438.46	5113.71	4030.49	4834.91	2014.36	1.06295	0.788173	1	0.416628	Mus musculus pyruvate kinase, muscle (Pkm2), mRNA, XM_979725 XM_979753 XM_979779 XM_979805 XM_979833 XM_979863 XM_979890 XM_979922 XM_979949	AA414905; AL024370; Pk-3; Pk3; Pk-2; AL024424
ILMN_2706393	Siah1b	39.9039	29.7902	134.472	52.8261	72.0133	30.0189	0.74655	0.39284	1	0.416852	Mus musculus seven in absentia 1B (Siah1b), mRNA,	AA960570; Sinh1b
ILMN_2992009	Lrdd	101.416	68.7254	81.6231	42.0026	100.573	41.9551	0.677658	0.514592	1	0.417162	Mus musculus leucine-rich and death domain containing (Lrdd), mRNA,	1200011D09Rik; AU042446; Pidd
ILMN_2691187	Rbbp7	248.224	150.656	1726.69	1355.54	904.647	377.89	0.606934	0.78505	1	0.417721	Mus musculus retinoblastoma binding protein 7 (Rbbp7), mRNA,	mRbAp46; AI173248; AU019541; BB114024; AA409861
ILMN_3157773	Recql4	124.921	100.609	111.544	54.6781	81.7782	34.1678	0.805377	0.490191	1	0.417811	Mus musculus RecQ protein-like 4 (Recql4), mRNA,
ILMN_2919343	Aven	318.709	209.045	397.275	252.003	211.129	88.3025	0.65591	0.63433	1	0.418239	Mus musculus apoptosis, caspase activation inhibitor (Aven), mRNA,	MGC124011; mAven-L; 1700056A21Rik; 1700013A01Rik; mAven-S
ILMN_2730498	Mbd3	515.412	368.305	487.915	380.921	464.233	194.46	0.714584	0.780713	1	0.418884	Mus musculus methyl-CpG binding domain protein 3 (Mbd3), mRNA,	AI181826; AU019209
ILMN_2932359	Tpi1	2190.06	1632.19	3824.73	2329.51	3405.76	1432.54	0.745269	0.609066	1	0.420623	Mus musculus triosephosphate isomerase 1 (Tpi1), mRNA,	Tpi; Tpi-1; AI255506
ILMN_2417813	Tuba3b	96.5461	79.6618	164.706	123.954	133.984	56.372	0.825117	0.752582	1	0.420736	Mus musculus tubulin, alpha 3B (Tuba3b), mRNA,	Tuba7; M[a]7
ILMN_1232186	Ung	62.865	39.3767	155.31	65.332	92.3727	38.9526	0.62637	0.420656	1	0.421689	Mus musculus uracil DNA glycosylase (Ung), transcript variant 2, mRNA,	UNG1; UNG2
ILMN_1230137	Tpi1	4825.11	3667.06	10001.6	5879.84	7426.8	3135.6	0.759994	0.587887	1	0.4222	Mus musculus triosephosphate isomerase 1 (Tpi1), mRNA,	Tpi; Tpi-1; AI255506
ILMN_2919259	Scd2	83.4235	93.6326	431.436	362.972	373.058	158.029	1.12238	0.841313	1	0.423603	Mus musculus stearoyl-Coenzyme A desaturase 2 (Scd2), mRNA,	Scd-2
ILMN_2631097	Msh6	1331.4	947.534	3394.57	2127.84	1254.87	532.993	0.711683	0.626836	1	0.424742	Mus musculus mutS homolog 6 (E, coli) (Msh6), mRNA,	Gtmbp; GTBP; AW550279; AU044881
ILMN_2680648	Atad2	41.8506	40.9736	142.122	117.331	72.0437	30.6339	0.979045	0.825562	1	0.425213	Mus musculus ATPase family, AAA domain containing 2 (Atad2), mRNA, XM_977863 XM_986850 XM_986886 XM_986920 XM_986957 XM_986994 XM_987027 XM_987064 XM_987087	MGC38189; 2610509G12Rik
ILMN_2775202	Rragd	311.273	208.309	445.354	224.954	220.448	93.7608	0.669217	0.505112	1	0.425318
ILMN_2688075	Cyp51	269.321	167.76	983.373	785.703	504.697	215.08	0.622899	0.798988	1	0.426157	Mus musculus cytochrome P450, family 51 (Cyp51), mRNA,	AI426508
ILMN_2601856	F730047E07Rik	107.474	74.7127	127.084	72.2872	98.2335	41.9212	0.69517	0.568813	1	0.426751	Mus musculus RIKEN cDNA F730047E07 gene (F730047E07Rik), mRNA,	Gm134
ILMN_2588362	Cdca8	392.608	223.792	717.456	330.566	496.086	212.182	0.570012	0.460748	1	0.427713	Mus musculus cell division cycle associated 8 (Cdca8), mRNA,	4831429J16Rik; AU044747; MESRGP; BOR; D4Ertd421e
ILMN_2470799	LOC100047579	728.791	298.593	1401.06	482.223	998.516	427.925	0.40971	0.344185	1	0.428561	PREDICTED: Mus musculus similar to transmembrane protein 20 (LOC100047579), mRNA,
ILMN_2774640	Blm	476.525	336.431	1095.32	585.214	480.64	206.541	0.706009	0.534285	1	0.42972	Mus musculus Bloom syndrome homolog (human) (Blm), transcript variant 1, mRNA,
ILMN_1240716	Etaa1	190.682	122.443	503.741	278.254	201.062	86.6709	0.642132	0.552374	1	0.431065	Mus musculus Ewing's tumor-associated antigen 1 (Etaa1), mRNA,	5730466H23Rik; AA672646; RP23-353E13,3
ILMN_1213167	Eif4g2	198.475	176.062	984.09	919.193	503.573	217.675	0.887075	0.934054	1	0.43226
ILMN_2631098	Msh6	1376.7	998.832	3437.57	2225.3	1314.33	568.391	0.725528	0.647349	1	0.432457	Mus musculus mutS homolog 6 (E, coli) (Msh6), mRNA,	Gtmbp; GTBP; AW550279; AU044881
ILMN_2663328	Ccdc99	217.958	165.545	332.559	222.02	213.236	92.3134	0.759528	0.667612	1	0.432916	Mus musculus coiled-coil domain containing 99 (Ccdc99), mRNA,	AA409762; 2810049B11Rik; 1700018I02Rik; 2600001J17Rik
ILMN_1238374	Cdc7	443.716	485.428	648.936	494.803	697.862	302.841	1.09401	0.762485	1	0.433956	Mus musculus cell division cycle 7 (S, cerevisiae) (Cdc7), mRNA,	muCdc7; AI597260; Cdc7l1; MGC91067
ILMN_2699003	Siva1	2111.97	2026.24	1432.68	1511.99	1427.55	619.705	0.95941	1.05535	1	0.434103	Mus musculus SIVA1, apoptosis-inducing factor (Siva1), mRNA,	CD27bp; Siva
ILMN_1256354	Gclm	313.523	235.331	619.154	377.221	265.732	115.626	0.750602	0.609251	1	0.435121	Mus musculus glutamate-cysteine ligase , modifier subunit (Gclm), mRNA,	Glclr
ILMN_2597840	Rpa2	95.5622	57.4528	316.492	124.764	122.874	53.5145	0.601208	0.394207	1	0.435522	Mus musculus replication protein A2 (Rpa2), mRNA,	AI325195; AA409079; AU020965; Rf-A2
ILMN_2913326	2610039C10Rik	659.429	399.244	1244.07	756.126	847.499	369.559	0.60544	0.607783	1	0.436058	Mus musculus RIKEN cDNA 2610039C10 gene (2610039C10Rik), mRNA,	2810018N07Rik; MGC100039
ILMN_2648397	Anapc5	473.422	416.178	1543.49	1838.69	782.845	341.499	0.879084	1.19125	1	0.436228	Mus musculus anaphase-promoting complex subunit 5 (Anapc5), transcript variant 1, mRNA,	AA986414; AA536819; 2510006G12Rik; Anpc5; AA408751
ILMN_2757125	Prc1	1192.33	985.732	2691.52	2290.62	1553.76	678.07	0.82673	0.85105	1	0.436405	Mus musculus protein regulator of cytokinesis 1 (Prc1), mRNA,	D7Ertd348e; MGC6745
ILMN_2717613	Cdk2	329.828	238.039	828.899	458.962	528.173	230.595	0.721706	0.553701	1	0.436589
ILMN_2747641	Kif4	72.7044	64.2986	115.795	89.2559	95.4242	41.6801	0.884385	0.770807	1	0.436788	Mus musculus kinesin family member 4 (Kif4), mRNA,	Kns4; D330050K22Rik; AI323435
ILMN_2975041	Nxt1	479.505	236.156	704.461	395.445	587.619	257.043	0.4925	0.561344	1	0.437431	Mus musculus NTF2-related export protein 1 (Nxt1), mRNA,	1110001N02Rik
ILMN_1225528	Trib3	48.7521	63.2439	41.6598	43.4569	64.5712	28.2636	1.29725	1.04314	1	0.437713	Mus musculus tribbles homolog 3 (Drosophila) (Trib3), mRNA,	Trb3; SKIP3; SINK; Ifld2; Nipk; TRB-3
ILMN_2684260	Mtbp	163.533	114.885	299.732	155.608	211.795	92.7724	0.702516	0.519155	1	0.43803	Mus musculus Mdm2, transformed 3T3 cell double minute p53 binding protein (Mtbp), mRNA,	MDM2BP; AI429604
ILMN_2664686	Chaf1b	412.966	176.631	605.816	234.829	341.976	149.922	0.427712	0.387624	1	0.438401	Mus musculus chromatin assembly factor 1, subunit B (p60) (Chaf1b), mRNA,	CAF1P60; MPHOSPH7; 2600017H24Rik; CAF1A; CAF-Ip60; CAF1; C76145
ILMN_2699488	Lamb2	80.6069	34.3394	65.6572	32.8081	68.5629	30.1048	0.42601	0.499687	1	0.439083	Mus musculus laminin, beta 2 (Lamb2), mRNA,	Lams; AW211941; Lamb-2
ILMN_1218967	Kif2c	468.829	519.344	539.749	471	425.052	186.754	1.10775	0.872627	1	0.439367	Mus musculus kinesin family member 2C (Kif2c), mRNA, XM_986361	MCAK; X83316; MGC11883; 4930402F02Rik; Knsl6; ESTM5
ILMN_2744217	Spag5	407.347	429.295	863.071	754.756	484.002	212.737	1.05388	0.8745	1	0.439538	Mus musculus sperm associated antigen 5 (Spag5), mRNA,	Mastrin; S17; MAP126; AI874642; Deepest; D11Bhm180e
ILMN_2632712	Birc5	1379.18	1008.38	1601.73	1232.47	1402.07	616.901	0.731145	0.769465	1	0.439992	Mus musculus baculoviral IAP repeat-containing 5 (Birc5), transcript variant 1, mRNA,	survivin40; AAC-11; TIAP; Api4
ILMN_1235363	Gsg2	255.401	177.539	313.318	103.524	159.898	70.4316	0.695137	0.330411	1	0.44048	Mus musculus germ cell-specific gene 2 (Gsg2), mRNA,	MGC130563; Haspin
ILMN_2793442	Ssx2ip	222.362	120.225	410.812	218.183	223.994	99.1912	0.540674	0.531102	1	0.442829	Mus musculus synovial sarcoma, X breakpoint 2 interacting protein (Ssx2ip), mRNA,	Adip; AU014939; AU042321
ILMN_2663114	Skp2	67.6866	49.6305	231.754	124.988	124.29	55.0932	0.73324	0.539314	1	0.443262	Mus musculus S-phase kinase-associated protein 2 (p45) (Skp2), transcript variant 2, mRNA,	FBXL1; MGC102075; MGC116668
ILMN_2693785	Cenph	103.46	94.272	306.846	143.464	151.63	67.353	0.911193	0.467545	1	0.444195	Mus musculus centromere protein H (Cenph), mRNA,	AU044255; CENP-H; 2810046K12Rik; 2610042E16Rik; 2410018A12Rik; 1700021I11Rik; ENP
ILMN_2692306	Suv39h1	115.828	89.8219	238.33	116.52	121.065	53.8062	0.775479	0.488903	1	0.444439	Mus musculus suppressor of variegation 3-9 homolog 1 (Drosophila) (Suv39h1), mRNA,	AI852103; mIS6; DXHXS7466e; AL022883
ILMN_2719473	Asf1b	119.051	77.3327	267.567	176.239	217.162	96.723	0.649577	0.658673	1	0.445395	Mus musculus ASF1 anti-silencing function 1 homolog B (S, cerevisiae) (Asf1b), mRNA,	AA409591; 1700003K02Rik
ILMN_3121255	Vegfa	44.6859	64.1787	56.5314	39.4763	89.9546	40.0977	1.43622	0.698308	1	0.445755	Mus musculus vascular endothelial growth factor A (Vegfa), transcript variant 1, mRNA,	Vegf; VEGF120; VPF; VEGF-A
ILMN_2943217	Jtv1	379.761	322.643	555.785	310.427	317.38	141.53	0.849595	0.558538	1	0.445931	Mus musculus JTV1 gene (Jtv1), mRNA,	MGC36346; MGC36522; AA407225; MGC37389; AA407136; MGC30261
ILMN_2660663	Ak2	220.007	173.549	280.098	130.02	199.102	88.8105	0.788836	0.464195	1	0.446055	Mus musculus adenylate kinase 2 (Ak2), transcript variant 2, mRNA,	D4Ertd220e; Ak-2
ILMN_1259473	Fen1	1309.46	615.294	2141.55	624.307	1084.89	484.776	0.469883	0.291522	1	0.446843	Mus musculus flap structure specific endonuclease 1 (Fen1), mRNA,	AW538437
ILMN_2968907	Tipin	1306.05	625.038	2438.02	1137.99	1170.86	523.363	0.47857	0.466768	1	0.446992	Mus musculus timeless interacting protein (Tipin), mRNA,	1110018P21Rik; 1110005A05Rik
ILMN_1239314	Foxm1	123.473	104.756	107.386	71.1517	140.617	62.862	0.848413	0.662577	1	0.447044	Mus musculus forkhead box M1 (Foxm1), mRNA,	Mpm2; Fkh16; AW554517; WIN; AA408308; Foxm1b; HFH-11B; MPHOSPH2
ILMN_1219574	Hist1h2af	8660.7	10628.4	3902.89	4878.49	9337.77	4175.37	1.2272	1.24997	1	0.447148	Mus musculus histone cluster 1, H2af (Hist1h2af), mRNA,	H2a-221
ILMN_2620106	Dhcr24	116.19	89.8161	78.7442	63.4491	52.115	23.313	0.773012	0.805763	1	0.447336
ILMN_2519676	Triobp	721.497	825.913	940.325	2224.22	863.778	386.466	1.14472	2.36538	1	0.447414
ILMN_2496421	Xrcc3	76.5373	54.693	85.1233	38.6721	70.726	31.6536	0.714594	0.454306	1	0.447553	Mus musculus X-ray repair complementing defective repair in Chinese hamster cells 3 (Xrcc3), mRNA,	AW537713; 4432412E01Rik; AI182522
ILMN_2512216	Tubgcp2	309.471	319.794	412.02	319.809	273.681	122.611	1.03336	0.776199	1	0.448008	Mus musculus tubulin, gamma complex associated protein 2 (Tubgcp2), mRNA,	1700022B05Rik
ILMN_2890574	Nup85	1170.72	711.681	1855.58	708.735	940.867	421.524	0.6079	0.381949	1	0.448017	Mus musculus nucleoporin 85 (Nup85), mRNA,	MGC105225; Pcnt1; frount
ILMN_2791963	E2f6	289.907	206.568	466.87	263.67	340.785	152.739	0.712535	0.564761	1	0.448196	Mus musculus E2F transcription factor 6 (E2f6), mRNA,	AI462434; E2F6b; EMA
ILMN_2592285	Skp2	229.157	148.578	520.026	282.242	248.66	111.758	0.648366	0.542746	1	0.449442	Mus musculus S-phase kinase-associated protein 2 (p45) (Skp2), transcript variant 2, mRNA,	FBXL1; MGC102075; MGC116668
ILMN_1242390	Actn4	41.3265	42.5323	80.3777	76.8527	58.4481	26.2987	1.02918	0.956145	1	0.44995	Mus musculus actinin alpha 4 (Actn4), mRNA,	C77391; MGC102374
ILMN_2645439	Bmi1	59.8034	41.2295	187.512	155.014	144.009	64.8054	0.689417	0.826689	1	0.450008	Mus musculus Bmi1 polycomb ring finger oncogene (Bmi1), mRNA,	Pcgf4; AW546694; Bmi-1
ILMN_2726047	Rfc3	132.842	90.8666	197.079	118.169	165.172	74.3411	0.684018	0.599605	1	0.450082
ILMN_2617245	Thoc4	1693.96	977.957	2454.79	1646.8	1928.59	871.478	0.577321	0.670851	1	0.451873	Mus musculus THO complex 4 (Thoc4), mRNA,	ALY; REF1; Refbp1
ILMN_2693858	D14Ertd449e	340.79	128.76	740.064	626.819	451.022	203.808	0.377826	0.84698	1	0.451879	Mus musculus DNA segment, Chr 14, ERATO Doi 449, expressed (D14Ertd449e), mRNA,	AA960404; 0610010A22Rik; 0610008K04Rik
ILMN_1236111	Fcrla	1992.45	28.5145	3274.75	117.647	2162.25	977.656	0.0143113	0.0359255	1	0.452148	Mus musculus Fc receptor-like A (Fcrla), mRNA,	mFREB; FREB; Freb1; Fcrlm1; FCRL1; Fcrx; mFcrX; BB219290; FCRL
ILMN_2628708	Depdc1b	111.577	97.9569	155.033	108.036	149.353	67.5348	0.877927	0.696859	1	0.452183	Mus musculus DEP domain containing 1B (Depdc1b), mRNA,	XTP1; 9830132O03; AW260467
ILMN_3002284	Yeats4	531.602	509.238	615.373	698.501	801.309	362.87	0.957931	1.13509	1	0.452847	Mus musculus YEATS domain containing 4 (Yeats4), mRNA,	GAS41; B230215M10Rik; NuBI-1; 4930573H17Rik
ILMN_2749143	2810428I15Rik	547.168	535.669	291.103	344.498	513.781	233.01	0.978986	1.18342	1	0.453521
ILMN_2757870	Psmb10	696.345	174.865	490.806	186.486	562.52	255.269	0.251119	0.379959	1	0.453795	Mus musculus proteasome (prosome, macropain) subunit, beta type 10 (Psmb10), mRNA,	Mecl1
ILMN_2640971	Pafah1b3	1154.09	496.371	1028.99	477.337	1439.6	654.004	0.430098	0.463891	1	0.454296	Mus musculus platelet-activating factor acetylhydrolase, isoform 1b, alpha1 subunit (Pafah1b3), mRNA,	mus[g]; Pafahg
ILMN_2684261	Mtbp	144.029	93.8061	255.948	136.567	179.885	81.823	0.651298	0.533571	1	0.454864	Mus musculus Mdm2, transformed 3T3 cell double minute p53 binding protein (Mtbp), mRNA,	MDM2BP; AI429604
ILMN_2895630	Xrcc2	92.0564	72.113	153.355	70.999	115.081	52.358	0.783357	0.462971	1	0.454968	Mus musculus X-ray repair complementing defective repair in Chinese hamster cells 2 (Xrcc2), mRNA,	RecA; 8030409M04Rik; RAD51; 4921524O04Rik
ILMN_2613118	Rfc4	491.537	279.104	1234.04	570.336	592.691	269.701	0.56782	0.462171	1	0.455046
ILMN_2911855	Espl1	283.603	198.439	190.409	81.7934	282.456	128.588	0.699706	0.429568	1	0.455251	Mus musculus extra spindle poles-like 1 (S, cerevisiae) (Espl1), mRNA,	AL024103; ESP1; PRCE; AU045071; SSE
ILMN_1223624	Hras1	286.105	224.305	233.38	180.86	229.405	104.448	0.783995	0.774961	1	0.455298	Mus musculus Harvey rat sarcoma virus oncogene 1 (Hras1), mRNA,	c-Ha-ras; H-ras; c-rasHa; Harvey-ras; Ha-ras; c-H-ras; ras; Hras-1; Kras2
ILMN_2651534	Rnf8	295.419	369.098	332.252	366.117	297.261	135.579	1.2494	1.10193	1	0.456095	Mus musculus ring finger protein 8 (Rnf8), mRNA,	AIP37; 3830404E21Rik
ILMN_2483748	Xrcc2	91.2089	63.3296	135.379	65.9229	114.798	52.4222	0.694335	0.486951	1	0.456648	Mus musculus X-ray repair complementing defective repair in Chinese hamster cells 2 (Xrcc2), mRNA,	RecA; 8030409M04Rik; RAD51; 4921524O04Rik
ILMN_1255960	Spc25	105.296	92.9308	482.152	494.846	226.782	103.563	0.882571	1.02633	1	0.456663	Mus musculus SPC25, NDC80 kinetochore complex component, homolog (S, cerevisiae) (Spc25), mRNA,	2610205L13Rik; Spbc25; 2600017H08Rik
ILMN_1216213	Incenp	673.63	556.965	575.99	296.588	490.588	224.102	0.826811	0.514919	1	0.456802	Mus musculus inner centromere protein (Incenp), mRNA,	AU019509; C77457; 2700067E22Rik; C130081E20
ILMN_2637804	4933407P14Rik	74.9723	54.1959	182.415	117.662	104.581	47.7946	0.722878	0.645024	1	0.45701
ILMN_1253804	Nup50	83.1628	75.3903	127.563	96.0446	76.9002	35.1786	0.906539	0.752919	1	0.457458	Mus musculus nucleoporin 50 (Nup50), mRNA,	Npap60; 1700030K07Rik; AI413123
ILMN_1237695	Pfkp	352.907	178.998	1020.21	451.27	1012.23	463.293	0.507209	0.442331	1	0.457694	Mus musculus phosphofructokinase, platelet (Pfkp), mRNA,	9330125N24Rik; PFK-C; 1200015H23Rik
ILMN_3022428	Tmpo	213.297	167.317	1045.75	611.979	369.206	169.16	0.784433	0.585205	1	0.458173	Mus musculus thymopoietin (Tmpo), transcript variant 3, mRNA,	5630400D24Rik; TP; AI195756; AI606875; AW214352; AW547477; LAP2
ILMN_2703829	Fcrla	1590.42	28.9489	2766.92	108.016	1711.44	784.184	0.018202	0.0390385	1	0.458201	Mus musculus Fc receptor-like A (Fcrla), mRNA,	mFREB; FREB; Freb1; Fcrlm1; FCRL1; Fcrx; mFcrX; BB219290; FCRL
ILMN_1245658	Nxt2	113.326	83.5854	443.94	411.458	250.023	114.564	0.737566	0.926832	1	0.458213	Mus musculus nuclear transport factor 2-like export factor 2 (Nxt2), mRNA,	AI787442; 6330587F24Rik; P15-2
ILMN_2907878	H2afx	660.741	1066.14	699.514	931.019	781.239	358.254	1.61355	1.33095	1	0.458571	Mus musculus H2A histone family, member X (H2afx), mRNA,	Hist5-2ax; H2A,X; AW228881; H2ax
ILMN_2739544	Stc2	72.1576	50.3635	82.7461	42.5315	117.551	53.9623	0.697964	0.514	1	0.459054	Mus musculus stanniocalcin 2 (Stc2), mRNA,	mustc2; Stc2l
ILMN_1221255	Ldlr	27.2745	28.2223	40.223	32.2805	41.8192	19.2047	1.03475	0.802538	1	0.459232	Mus musculus low density lipoprotein receptor (Ldlr), mRNA, XM_979210 XM_979251	Hlb301
ILMN_2624827	Tcf19	142.76	153.455	227.395	228.092	200.027	91.909	1.07492	1.00306	1	0.459483	Mus musculus transcription factor 19 (Tcf19), mRNA,	5730403J10Rik; AW495861
ILMN_2678828	Eif5a	1812.24	746.822	5684.21	3727.27	2969.91	1366.12	0.4121	0.655723	1	0.459986	Mus musculus eukaryotic translation initiation factor 5A (Eif5a), mRNA,	uORF3; MGC6725; uORF; D19Wsu54e; uORF2; AA410058; uORF1; Eif4d
ILMN_2669172	4930547N16Rik	134.652	131.761	273.596	171.591	152.945	70.4658	0.978526	0.627168	1	0.460727	Mus musculus RIKEN cDNA 4930547N16 gene (4930547N16Rik), mRNA,	AI503644
ILMN_2797642	Ncaph	530.95	492.231	893.738	574.309	579.763	267.378	0.927075	0.642593	1	0.461186	Mus musculus non-SMC condensin I complex, subunit H (Ncaph), mRNA,	MGC38424; mKIAA0074; HCAP-H; A730011O11Rik; Brrn1
ILMN_1232030	Kif4	66.3431	69.3919	105.066	90.3436	90.7621	41.8845	1.04595	0.859874	1	0.461476	Mus musculus kinesin family member 4 (Kif4), mRNA,	Kns4; D330050K22Rik; AI323435
ILMN_3094743	Tmpo	66.7909	46.0404	275.557	143.955	123.288	56.9273	0.689321	0.522414	1	0.461744	Mus musculus thymopoietin (Tmpo), transcript variant 3, mRNA,	5630400D24Rik; TP; AI195756; AI606875; AW214352; AW547477; LAP2
ILMN_2698843	Dcakd	623.403	615.369	1614	1663.98	668.115	308.862	0.987113	1.03097	1	0.462289	Mus musculus dephospho-CoA kinase domain containing (Dcakd), mRNA,	6720485C15Rik; FLJ22955; 3010024O21Rik; RP23-463E7,9; AI849483
ILMN_3137980	Zfp41	97.219	68.5825	147.203	101.674	155.188	71.8408	0.705444	0.690701	1	0.462928	Mus musculus zinc finger protein 41 (Zfp41), transcript variant 2, mRNA,	CTfin92; Zfp-41
ILMN_2643883	Brip1	73.2307	65.7843	121.674	66.8489	111.477	51.6339	0.898316	0.549409	1	0.463182	Mus musculus BRCA1 interacting protein C-terminal helicase 1 (Brip1), mRNA,	3110009N10Rik; 8030460J03Rik; Bach1; OF
ILMN_2600348	Sqle	86.7142	78.8361	629.629	549.124	321.707	149.141	0.909148	0.87214	1	0.463592	Mus musculus squalene epoxidase (Sqle), mRNA,	AI323792
ILMN_2921749	Xab1	1121.22	731.771	1434.29	684.716	919.162	426.265	0.652658	0.477392	1	0.463754	Mus musculus XPA binding protein 1 (Xab1), mRNA,	MBDIN; NTPBP; AI449615; 2410004J02Rik
ILMN_3163514	Orc1l	53.6842	48.1694	165.152	52.7976	52.22	24.2241	0.897274	0.319691	1	0.463885	Mus musculus origin recognition complex, subunit 1-like (S,cereviaiae) (Orc1l), transcript variant A, mRNA,	AA545195; MmORC1; Orc1
ILMN_2604467	Tmem42	182.255	274.138	146.971	246.388	132.201	61.3378	1.50415	1.67644	1	0.463974	Mus musculus transmembrane protein 42 (Tmem42), mRNA,	AV003444; 0610027O18Rik; 4933429E06Rik; MGC29956; D9Ertd662e
ILMN_1238640	2310003H01Rik	262.983	352.217	280.257	439.946	230.095	106.844	1.33931	1.56979	1	0.464345	Mus musculus RIKEN cDNA 2310003H01 gene (2310003H01Rik), mRNA,	RP23-82I5,4
ILMN_2796429	Psip1	703.768	781.045	2028.47	1959.28	913.792	424.903	1.1098	0.965892	1	0.464988	Mus musculus PC4 and SFRS1 interacting protein 1 (Psip1), mRNA,	AU015605; Psip2; AA408851; Ledgfa; Ledgfb
ILMN_1258376	Kcnk6	74.6644	37.3681	158.92	111.716	80.2364	37.3432	0.500481	0.702969	1	0.465415	Mus musculus potassium inwardly-rectifying channel, subfamily K, member 6 (Kcnk6), mRNA,	D7Ertd764e; Toss; Twik2
ILMN_2711410	Pmf1	181.426	131.194	129.406	83.9786	123.627	57.5383	0.723127	0.648956	1	0.465419	Mus musculus polyamine-modulated factor 1 (Pmf1), mRNA,	AW060657; AL033286; 2600009M07Rik
ILMN_2747507	Pitpnm2	159.269	101.143	346.775	135.66	153.195	71.3429	0.635045	0.391206	1	0.465702	Mus musculus phosphatidylinositol transfer protein, membrane-associated 2 (Pitpnm2), mRNA,	NIR3; mKIAA1457; RDGBA2; Rdgb2
ILMN_2880623	Nudt1	142.983	98.6941	107.33	87.3843	109.534	51.0306	0.690251	0.814161	1	0.46589	Mus musculus nudix (nucleoside diphosphate linked moiety X)-type motif 1 (Nudt1), mRNA,	Mth1
ILMN_2698767	Cdc20	131.366	109.26	621.54	564.138	292.377	136.394	0.831721	0.907647	1	0.466501	Mus musculus cell division cycle 20 homolog (S, cerevisiae) (Cdc20), mRNA,	C87100; p55CDC; 2310042N09Rik
ILMN_2660182	Acot7	200.901	117.773	384.756	228.954	273.941	127.868	0.586222	0.595062	1	0.466773	Mus musculus acyl-CoA thioesterase 7 (Acot7), mRNA,	LACH1; AU015130; AU042212; Bach; ACH1; 2410041A17Rik; ACT; CTE-II; AW557066
ILMN_2867901	Cdc20	592.081	499.529	1308.26	908.42	729.998	341.186	0.843683	0.694372	1	0.46738	Mus musculus cell division cycle 20 homolog (S, cerevisiae) (Cdc20), mRNA,	C87100; p55CDC; 2310042N09Rik
ILMN_1245448	Wdhd1	366.007	282.871	721.936	271.965	385.399	180.168	0.772857	0.376716	1	0.467485	Mus musculus WD repeat and HMG-box DNA binding protein 1 (Wdhd1), mRNA,	AND-1; D630024B06Rik; A630092E18
ILMN_2654013	Nup133	524.063	297.316	631.423	271.343	564.115	264.068	0.567329	0.429732	1	0.46811	Mus musculus nucleoporin 133 (Nup133), mRNA,	4832420O05Rik
ILMN_1238894	Nasp	60.2938	57.3228	177.881	161.487	66.9389	31.3923	0.950725	0.90784	1	0.468969	Mus musculus nuclear autoantigenic sperm protein (histone-binding) (Nasp), transcript variant 2, mRNA,	5033430J04Rik; AI317140; AI131596; D4Ertd767e; Epcs32
ILMN_2603699	Birc5	679.117	487.707	938.361	786.317	1060.35	497.659	0.718148	0.837968	1	0.469337	Mus musculus baculoviral IAP repeat-containing 5 (Birc5), transcript variant 1, mRNA,	survivin40; AAC-11; TIAP; Api4
ILMN_2946088	Panx1	221.184	145.063	260.329	184.675	212.689	99.9428	0.655845	0.709389	1	0.469901	Mus musculus pannexin 1 (Panx1), mRNA,	AI847747
ILMN_2681241	Birc5	928.038	594.988	1557.58	1189.83	1475.89	695.361	0.641125	0.763897	1	0.471148
ILMN_2701851	Ncapd3	321.865	394.135	575.493	511.894	543.406	256.375	1.22453	0.889487	1	0.471793	Mus musculus non-SMC condensin II complex, subunit D3 (Ncapd3), mRNA,	AI195468; 4632407J06Rik; 2810487N22Rik; AU018739; B130055D15Rik; mKIAA0056
ILMN_1246609	Rasgrp1	53.0958	27.8032	454.844	36.0743	91.0123	43.0243	0.523642	0.0793113	1	0.472731	Mus musculus RAS guanyl releasing protein 1 (Rasgrp1), mRNA,	Rasgrp
ILMN_2747744	Thoc4	2147.91	1152.45	3291.33	1960.86	2048.03	970.163	0.536547	0.595767	1	0.473706	Mus musculus THO complex 4 (Thoc4), mRNA,	ALY; REF1; Refbp1
ILMN_1229468	C79407	107.763	115.991	439.865	269.533	185.394	87.9535	1.07635	0.612762	1	0.474414	Mus musculus expressed sequence C79407 (C79407), mRNA,	6720403H11; KIAA1903; mKIAA1903
ILMN_2741063	2810003C17Rik	60.5691	28.1602	191.757	33.012	76.3574	36.231	0.464926	0.172155	1	0.474493	Mus musculus RIKEN cDNA 2810003C17 gene (2810003C17Rik), mRNA,	C87647; AI043124; MGC30545; Iba2
ILMN_1227164	Tubb5	9515.8	8142.86	18248.8	12486.4	11290.6	5358.3	0.85572	0.684233	1	0.474578	Mus musculus tubulin, beta 5 (Tubb5), mRNA,	AI596182; M(beta)5; AA408537; B130022C14Rik
ILMN_2611261	Atp5j	239.863	172.626	258.813	325.404	277.525	131.731	0.719686	1.2573	1	0.474663	Mus musculus ATP synthase, H+ transporting, mitochondrial F0 complex, subunit F (Atp5j), nuclear gene encoding mitochondrial protein, mRNA,
ILMN_2982965	Prim2	180.72	175.247	246.267	165.829	200.392	95.1878	0.969714	0.673371	1	0.475009	Mus musculus DNA primase, p58 subunit (Prim2), mRNA,	AI323589
ILMN_2716497	Ccne1	106.659	55.3294	187.321	75.3733	76.8866	36.5368	0.518753	0.402375	1	0.475203	Mus musculus cyclin E1 (Ccne1), mRNA,	AW538188
ILMN_2617496	Dek	414.585	326.873	839.66	567.497	349.858	166.279	0.788435	0.675866	1	0.475274	Mus musculus DEK oncogene (DNA binding) (Dek), mRNA,	1810019E15Rik; D13H6S231E
ILMN_2727318	Pgp	2902.07	1935.95	3846.33	2707.06	2657.05	1263.2	0.667094	0.703803	1	0.475415	Mus musculus phosphoglycolate phosphatase (Pgp), mRNA,	AI481330; MGC103027
ILMN_2744693	Ufc1	693.023	331.404	855.808	1157.01	585.85	278.637	0.4782	1.35195	1	0.475611	Mus musculus ubiquitin-fold modifier conjugating enzyme 1 (Ufc1), mRNA,	AA062310; 1110021H02Rik; ESTM29
ILMN_2610744	Myl4	507.861	70.4249	378.947	65.9723	352.123	167.603	0.13867	0.174094	1	0.475978	Mus musculus myosin, light polypeptide 4 (Myl4), mRNA,	ALC1; AMLC; MLC1a; GT1; Myla; ELC; ELC1a
ILMN_2632489	Ctdspl	54.5089	48.5364	50.7275	51.9882	55.7027	26.5336	0.890432	1.02485	1	0.476343	Mus musculus CTD (carboxy-terminal domain, RNA polymerase II, polypeptide A) small phosphatase-like (Ctdspl), mRNA,	AI426263; SCP3; 2810418J22Rik; HYA22
ILMN_1227920	Mre11a	109.396	85.1354	205.129	104.383	134.541	64.1292	0.778234	0.508864	1	0.476652	Mus musculus meiotic recombination 11 homolog A (S, cerevisiae) (Mre11a), mRNA,	Mre11b; Mre11
ILMN_2721208	Msto1	155.291	113.204	307.416	169.827	165.298	78.9783	0.728979	0.552434	1	0.477794	Mus musculus misato homolog 1 (Drosophila) (Msto1), mRNA,	BC008103; MGC11722; MGC118015; FLJ10504; mst
ILMN_1219168	Gpn1	229.052	132.274	501.854	228.746	268.999	128.533	0.577482	0.455802	1	0.477821	Mus musculus GPN-loop GTPase 1 (Gpn1), mRNA,	MBDIN; NTPBP; AI449615; 2410004J02Rik
ILMN_2693535	Nup107	234.834	168.581	392.01	192.228	238.843	114.332	0.717872	0.490365	1	0.478691	Mus musculus nucleoporin 107 (Nup107), mRNA,	AW541137; C76801
ILMN_2981689	Nup133	440.702	236.322	668.157	273.209	406.129	194.777	0.53624	0.408899	1	0.479594	Mus musculus nucleoporin 133 (Nup133), mRNA,	4832420O05Rik
ILMN_2653765	Nusap1	517.078	599.959	1652	1743.87	914.754	439.008	1.16029	1.05561	1	0.479919	Mus musculus nucleolar and spindle associated protein 1 (Nusap1), transcript variant 2, mRNA,	LNP; SAPL; BB165529; 2610201A12Rik; NuSAP; BM037; AI481307; Q0310; ANKT; AW547774
ILMN_2944546	Rfwd3	203.609	167.659	462.296	309.68	343.178	165.046	0.823433	0.669873	1	0.480934	Mus musculus ring finger and WD repeat domain 3 (Rfwd3), mRNA,	BC027246; MGC27888
ILMN_2896042	BC057552	267.948	188.764	524.456	466.53	248.177	119.396	0.70448	0.889551	1	0.481092	Mus musculus cDNA sequence BC057552 (BC057552), mRNA,	MGC66593; 6720484B16
ILMN_2723639	Pacs1	73.7349	61.8258	152.424	206.865	110.914	53.5311	0.838488	1.35716	1	0.482635
ILMN_2878548	Mthfd2	312.712	182.232	641.334	202.72	305.208	147.514	0.582747	0.316091	1	0.483324	Mus musculus methylenetetrahydrofolate dehydrogenase (NAD+ dependent), methenyltetrahydrofolate cyclohydrolase (Mthfd2), mRNA,	AW558851; NMDMC
ILMN_1257965	Ldha	7553.09	5053.98	16118.1	6785.38	8576.03	4145.56	0.669127	0.420978	1	0.483389	Mus musculus lactate dehydrogenase A (Ldha), mRNA,	Ldh-1; Ldh1; LDH-A; l7R2
ILMN_2599130	Aldoa	1655.38	1376.18	2132.06	1564.9	2508.51	1214.51	0.831339	0.733985	1	0.484154	Mus musculus aldolase A, fructose-bisphosphate (Aldoa), mRNA,	Aldo-1; MGC107164; Aldo1
ILMN_2720451	Dnmt1	739.217	556.194	1008.83	668.211	715.401	346.453	0.75241	0.662364	1	0.484278	Mus musculus DNA methyltransferase (cytosine-5) 1 (Dnmt1), mRNA,	MommeD2; Met-1; Dnmt; Dnmt1o; Met1; Cxxc9; MTase
ILMN_2966722	Ywhah	1148.08	727.078	2030.19	1152.24	1400.35	678.551	0.633298	0.567555	1	0.484557	Mus musculus tyrosine 3-monooxygenase/tryptophan 5-monooxygenase activation protein, eta polypeptide (Ywhah), mRNA,
ILMN_2741050	Rfc4	61.1931	50.8151	213.387	86.674	104.007	50.4622	0.830406	0.406182	1	0.485181	Mus musculus replication factor C (activator 1) 4 (Rfc4), mRNA,	A1; RFC37; AI894123; AU040575
ILMN_2734882	Cenpm	209.484	111.831	149.349	72.262	172.576	83.9063	0.53384	0.483848	1	0.4862	Mus musculus centromere protein M (Cenpm), transcript variant 1, mRNA,	2610019I03Rik; AI853711; Pane1
ILMN_2923463	Kif23	350.754	310.474	399.734	269.29	286.668	139.587	0.885163	0.673672	1	0.486927	Mus musculus kinesin family member 23 (Kif23), mRNA,	MKLP-1; Knsl5; C87313; CHO1; 3110001D19Rik; MKLP1
ILMN_2723931	E2f6	353.974	224.358	788.229	439.993	420.092	204.727	0.633827	0.558205	1	0.487339	Mus musculus E2F transcription factor 6 (E2f6), mRNA,	AI462434; E2F6b; EMA
ILMN_2641360	Ak2	641.642	371.429	1180.82	647.69	788.09	384.079	0.578872	0.548511	1	0.487354	Mus musculus adenylate kinase 2 (Ak2), transcript variant 1, mRNA,	D4Ertd220e; Ak-2
ILMN_2424605	Txnrd2	251.55	235.98	413.961	384.282	262.711	128.041	0.938105	0.928304	1	0.487381
ILMN_2816754	Ndc80	159.312	155.454	239.908	180.853	193.453	94.3471	0.975785	0.753844	1	0.487699	Mus musculus NDC80 homolog, kinetochore complex component (S, cerevisiae) (Ndc80), mRNA,	Kntc2; HEC; AV139730; 2610020P18Rik; HEC1
ILMN_2747651	Hat1	2430.14	1587	5153.98	3260.88	2624.37	1281.33	0.653049	0.632691	1	0.488244	Mus musculus histone aminotransferase 1 (Hat1), mRNA,	AA536933; Hat-1; 2410071B14Rik
ILMN_2519677	Triobp	535.912	656.687	965.86	1976.38	651.685	318.502	1.22536	2.04624	1	0.488736	Mus musculus TRIO and F-actin binding protein (Triobp), transcript variant 3, mRNA,	EST478828; Tara; mKIAA1662; AI428493
ILMN_2461345	Zfp41	81.9866	53.7385	94.8528	52.9411	104.879	51.3229	0.655454	0.55814	1	0.489355
ILMN_2646574	Siah1b	34.8614	30.4365	81.3623	37.344	43.1395	21.1166	0.873071	0.458984	1	0.489495	Mus musculus seven in absentia 1B (Siah1b), mRNA,	AA960570; Sinh1b
ILMN_2724785	Kcnab2	1286.23	512.688	2404.28	1262.01	1052.26	515.472	0.398597	0.524903	1	0.489869	Mus musculus potassium voltage-gated channel, shaker-related subfamily, beta member 2 (Kcnab2), mRNA,	I2rf5; F5; Kcnb3
ILMN_2672325	LOC100046163	225.424	72.1111	269.479	90.8434	211.498	103.62	0.319891	0.337108	1	0.489932	PREDICTED: Mus musculus similar to Nme6 protein (LOC100046163), mRNA,
ILMN_1232261	Ctnnal1	99.5511	87.3636	339.068	318.799	121.647	59.6223	0.877576	0.94022	1	0.490124	Mus musculus catenin (cadherin associated protein), alpha-like 1 (Ctnnal1), mRNA,	C86009; AW545119; AI616177; Catnal1; ACRP
ILMN_2901180	Spc25	126.143	110.75	448.46	388.488	209.772	102.833	0.877973	0.866272	1	0.490214	Mus musculus SPC25, NDC80 kinetochore complex component, homolog (S, cerevisiae) (Spc25), mRNA,	2610205L13Rik; Spbc25; 2600017H08Rik
ILMN_2837865	Lsm3	1003.46	498.949	1038.87	681.556	768.454	377.186	0.497227	0.656056	1	0.490838	Mus musculus LSM3 homolog, U6 small nuclear RNA associated (S, cerevisiae) (Lsm3), mRNA,	USS2; 1010001J12Rik; SMX4; 6030401D18Rik
ILMN_2673233	Pfkp	73.2445	48.6319	399.495	173.957	267.687	131.51	0.663966	0.435443	1	0.491283	Mus musculus phosphofructokinase, platelet (Pfkp), mRNA,	9330125N24Rik; PFK-C; 1200015H23Rik
ILMN_2935870	St3gal4	50.5983	37.1612	102.494	40.4759	54.587	26.8222	0.734436	0.394911	1	0.491366	Mus musculus ST3 beta-galactoside alpha-2,3-sialyltransferase 4 (St3gal4), mRNA,	Siat4c
ILMN_1240038	BC046331	342.59	233.333	471.265	322.812	238.506	117.208	0.681085	0.684991	1	0.491425	Mus musculus cDNA sequence BC046331 (BC046331), mRNA,	mKIAA0562; A930027E11; MGC54921; RP23-254N4,3; AI115523
ILMN_2877541	Crtap	126.35	76.1113	158.255	122.885	130.489	64.202	0.602383	0.776497	1	0.492012	Mus musculus cartilage associated protein (Crtap), mRNA,	CASP; 5730529N23Rik
ILMN_2593631	3000004C01Rik	281.343	258.237	242.726	153.359	235.99	116.124	0.917874	0.63182	1	0.492071	Mus musculus RIKEN cDNA 3000004C01 gene (3000004C01Rik), mRNA,
ILMN_2992403	2810452K22Rik	479.953	278.324	679.627	300.171	435.188	214.225	0.579897	0.44167	1	0.492259	Mus musculus RIKEN cDNA 2810452K22 gene (2810452K22Rik), mRNA,	Cinp; 1810047K05Rik
ILMN_3104928	Cenpm	195.109	112.68	147.224	68.2542	137.141	67.5115	0.577522	0.463608	1	0.49228	Mus musculus centromere protein M (Cenpm), transcript variant 2, mRNA,	Pane1; 2610019I03Rik; AI853711
ILMN_2508208	Wdr4	52.8982	40.0495	79.6555	55.6727	56.7495	27.9596	0.757106	0.698919	1	0.492684	Mus musculus WD repeat domain 4 (Wdr4), mRNA,	D530049K22Rik; AI415180; AI448349
ILMN_2986172	Chd1l	94.5145	86.6514	241.523	190.61	102.107	50.3441	0.916805	0.789202	1	0.493051	Mus musculus chromodomain helicase DNA binding protein 1-like (Chd1l), mRNA,	Snf2p; 4432404A22Rik
ILMN_1234152	Nxt1	36.58	30.2875	46.2166	43.3189	49.6011	24.5183	0.82798	0.937301	1	0.49431	Mus musculus NTF2-related export protein 1 (Nxt1), mRNA,	1110001N02Rik
ILMN_2733472	Cenpm	159.703	92.2623	104.218	58.1711	118.421	58.5604	0.577711	0.558167	1	0.49451	Mus musculus centromere protein M (Cenpm), transcript variant 2, mRNA,	Pane1; 2610019I03Rik; AI853711
ILMN_2499058	Ube2i	44.7903	43.646	79.5793	81.5155	59.3648	29.378	0.974452	1.02433	1	0.494873	Mus musculus ubiquitin-conjugating enzyme E2I (Ube2i), mRNA,	UBC9; Ubce9; Mmubc9; Ubce2i; 5830467E05Rik
ILMN_2683326	Exosc2	135.002	105.089	179.528	106.234	123.937	61.3604	0.778427	0.59174	1	0.495093	Mus musculus exosome component 2 (Exosc2), mRNA,	MGC30456; Rrp4
ILMN_2945275	Rbm15	186.916	200.1	284.239	152.598	170.191	84.3041	1.07053	0.536865	1	0.495351	Mus musculus RNA binding motif protein 15 (Rbm15), mRNA,	KIAA1438; C230088J01Rik; mKIAA1438
ILMN_3000116	Ttf2	363.21	204.608	549.054	232.655	388.603	192.51	0.563333	0.423737	1	0.495389	Mus musculus transcription termination factor, RNA polymerase II (Ttf2), mRNA,	8030447N19; 4632434F22Rik; AV218430
ILMN_2648746	Bckdk	441.235	366.468	468.212	366.987	443.876	220.009	0.83055	0.783805	1	0.495653	Mus musculus branched chain ketoacid dehydrogenase kinase (Bckdk), nuclear gene encoding mitochondrial protein, mRNA,	AI327402
ILMN_2745425	Rcc1	412.052	264.314	719.158	398.638	396.444	196.762	0.641458	0.554312	1	0.496316	Mus musculus regulator of chromosome condensation 1 (Rcc1), mRNA,	4931417M11Rik; Chc1; AI326872
ILMN_3002181	Ppif	2394.49	1407.94	4790.87	3155.11	2759.86	1369.96	0.587989	0.658567	1	0.496387	Mus musculus peptidylprolyl isomerase F (cyclophilin F) (Ppif), nuclear gene encoding mitochondrial protein, mRNA,	AW457192; PPIase
ILMN_2691706	Sac3d1	97.2275	78.6895	135.649	77.785	94.7508	47.0371	0.809334	0.57343	1	0.49643	Mus musculus SAC3 domain containing 1 (Sac3d1), mRNA,	AU015683; shd1; 2410004C24Rik
ILMN_2916705	Tuba1a	531.502	469.464	1634.59	1653.27	1301.27	646.017	0.883277	1.01142	1	0.49645	Mus musculus tubulin, alpha 1A (Tuba1a), mRNA,	MGC102098; Tuba1; MGC102097; Tuba-1; MGC102099
ILMN_2752010	Mcm4	28.5396	30.0428	91.5608	40.5358	42.6806	21.2002	1.05267	0.44272	1	0.496718	Mus musculus minichromosome maintenance deficient 4 homolog (S, cerevisiae) (Mcm4), mRNA,	mcdc21; KIAA4003; AI325074; 19G; Mcmd4; Cdc21; mKIAA4003; AU045576
ILMN_3144575	Itgb4	35.2797	25.4417	69.0049	30.8132	45.2673	22.4856	0.721143	0.446537	1	0.496729	Mus musculus integrin beta 4 (Itgb4), transcript variant 2, mRNA,	CD104; AA407042; C230078O20
ILMN_1251109	Slc25a45	153.937	107.916	304.056	328.028	159.828	79.393	0.70104	1.07884	1	0.49674	Mus musculus solute carrier family 25, member 45 (Slc25a45), mRNA,	AW491445
ILMN_3125363	Fxn	1035.93	1045.71	835.816	729.062	885.505	439.877	1.00944	0.872276	1	0.496753	Mus musculus frataxin (Fxn), mRNA,	FARR; Frda; FA; X25
ILMN_2672997	Rabif	99.0793	103.728	130.952	153.412	126.013	62.651	1.04692	1.17151	1	0.497179	Mus musculus RAB interacting factor (Rabif), mRNA,	AI842864; RASGFR3; E130318E12Rik; MSS4; AW549708
ILMN_2610531	Spr	167.521	175.966	194.175	246.565	116.364	57.8888	1.05041	1.26981	1	0.497482	Mus musculus sepiapterin reductase (Spr), mRNA,	AA409688
ILMN_2652042	Rad18	78.7527	89.2803	161.226	100.908	71.977	35.8841	1.13368	0.625883	1	0.49855
ILMN_2731135	Syce2	30.1606	25.2336	33.7494	25.8987	41.2664	20.6012	0.836641	0.767383	1	0.499225	Mus musculus synaptonemal complex central element protein 2 (Syce2), mRNA,	1700013H19Rik; Cesc1; AA407907
ILMN_1219113	LOC100045040	203.327	305.954	261.832	302.083	245.28	122.519	1.50473	1.15373	1	0.499506	PREDICTED: Mus musculus similar to ING1 protein (LOC100045040), misc RNA,
ILMN_2674001	Smyd2	172.453	150.846	283.222	258.58	223.439	111.774	0.874707	0.912995	1	0.500242	Mus musculus SET and MYND domain containing 2 (Smyd2), mRNA,	1110020E07Rik; Zmynd14; 4930402C15
ILMN_1234171	Ezh2	832.14	768.329	1070.29	722.749	846.226	423.351	0.923316	0.675281	1	0.500281	Mus musculus enhancer of zeste homolog 2 (Drosophila) (Ezh2), mRNA,	Enx-1; MGC90723; mKIAA4065; KIAA4065; Enx1h
ILMN_2601471	Ccnd1	869.896	640.798	1065.14	329.319	941.983	471.388	0.736638	0.30918	1	0.500421
ILMN_1223997	Crtap	120.822	68.1316	244.399	181.778	165.568	82.9382	0.563899	0.743778	1	0.500932	Mus musculus cartilage associated protein (Crtap), mRNA,	CASP; 5730529N23Rik
ILMN_2971171	Fcrla	1204.8	23.7807	2762.47	114.019	1397.06	700.258	0.0197383	0.0412743	1	0.501239	Mus musculus Fc receptor-like A (Fcrla), mRNA,	mFREB; FREB; Freb1; Fcrlm1; FCRL1; Fcrx; mFcrX; BB219290; FCRL
ILMN_1242779	LOC100044103	375.152	157.963	528.755	196.568	332.14	166.485	0.421065	0.371756	1	0.501249	PREDICTED: Mus musculus similar to mKIAA1645 protein (LOC100044103), mRNA,
ILMN_1257178	Zfp367	63.8188	51.5093	205.452	94.9909	103.205	51.7689	0.807118	0.46235	1	0.501611	Mus musculus zinc finger protein 367 (Zfp367), mRNA,	ZFF29a; ZFF29b; 8030486J21Rik
ILMN_2839682	Btbd6	129.717	131.147	125.921	160.123	84.2959	42.2861	1.01102	1.27161	1	0.501639	Mus musculus BTB (POZ) domain containing 6 (Btbd6), mRNA,
ILMN_2617499	Dek	546.096	415.419	1026.83	759.352	453.554	227.936	0.760707	0.739513	1	0.502556	Mus musculus DEK oncogene (DNA binding) (Dek), mRNA,	1810019E15Rik; D13H6S231E
ILMN_3049455	Fxn	80.7047	74.1577	87.9206	79.35	86.1313	43.29	0.918876	0.90252	1	0.502605	Mus musculus frataxin (Fxn), mRNA,	FARR; Frda; FA; X25
ILMN_2914843	Psmb10	924.178	226.896	807.745	381.88	768.602	387.294	0.245511	0.472773	1	0.503895	Mus musculus proteasome (prosome, macropain) subunit, beta type 10 (Psmb10), mRNA,	Mecl1
ILMN_2958912	Hnrnph3	48.3867	63.9801	96.6195	94.9014	83.7189	42.24	1.32227	0.982218	1	0.504546	Mus musculus heterogeneous nuclear ribonucleoprotein H3 (Hnrnph3), mRNA,	AI666703; AA693301
ILMN_1217337	4930427A07Rik	54.3602	53.8106	80.486	66.6467	63.1111	31.864	0.989891	0.828053	1	0.504887	Mus musculus RIKEN cDNA 4930427A07 gene (4930427A07Rik), mRNA,	AA536649; FLJ00116; mFLJ00116
ILMN_2606711	LOC100046163	116.939	47.5043	164.292	64.1986	121.293	61.2568	0.40623	0.39076	1	0.505032	PREDICTED: Mus musculus similar to Nme6 protein (LOC100046163), mRNA,
ILMN_2612206	Cdc20	941.352	734.999	1093.18	929.415	903.979	456.838	0.780791	0.850192	1	0.505364	Mus musculus cell division cycle 20 homolog (S, cerevisiae) (Cdc20), mRNA,	C87100; p55CDC; 2310042N09Rik
ILMN_1232600	Rnf125	93.9174	36.3278	182.056	65.3457	93.7066	47.3765	0.386806	0.358931	1	0.505583	Mus musculus ring finger protein 125 (Rnf125), mRNA,	4930553F04Rik
ILMN_2733185	Cdc42ep3	203.274	78.6024	415.493	261.003	378.604	191.912	0.386683	0.628176	1	0.506895	Mus musculus CDC42 effector protein (Rho GTPase binding) 3 (Cdc42ep3), mRNA,	UB1; Borg2; AA986861; 3200001F04Rik; Cep3
ILMN_1249749	Nudc	269.152	124.646	495.062	218.922	333.951	169.448	0.463108	0.442212	1	0.507403	Mus musculus nuclear distribution gene C homolog (Aspergillus) (Nudc), mRNA,	Silg92; SIG-92
ILMN_2659337	Cenpk	93.5131	47.8026	193.8	87.7141	90.2171	45.7775	0.511186	0.4526	1	0.507415	Mus musculus centromere protein K (Cenpk), transcript variant 1, mRNA,	Solzt; Cenp-K; C530004N04Rik; BB232189; Solt; B130045K24Rik
ILMN_2534090	LOC216443	614.79	306.035	1425.79	817.923	616.765	313.044	0.497789	0.573663	1	0.507557
ILMN_2614752	Elovl6	308.459	225.916	1016.27	474.818	354.06	179.817	0.732402	0.467216	1	0.507872	Mus musculus ELOVL family member 6, elongation of long chain fatty acids (yeast) (Elovl6), mRNA,	MGC107467; FAE; C77826; LCE
ILMN_1231705	Tmem48	385.61	337.146	1478.67	821.152	426.605	216.685	0.874319	0.555329	1	0.507928	Mus musculus transmembrane protein 48 (Tmem48), mRNA,	2810475A17Rik; NDC1; RP23-392J14,4; AI450313
ILMN_1238081	Oprs1	110.61	86.8315	447.076	357.29	175.413	89.2569	0.785027	0.79917	1	0.508839	Mus musculus opioid receptor, sigma 1 (Oprs1), mRNA,	AL024364; mSigmaR1
ILMN_1227726	Dis3l	422.22	213.926	643.213	546.178	329.061	167.789	0.506669	0.84914	1	0.509904	Mus musculus DIS3 mitotic control homolog (S, cerevisiae)-like (Dis3l), transcript variant 1, mRNA,	AV340375
ILMN_2671644	Cbfb	36.0512	27.3083	134.562	77.6907	73.5004	37.5113	0.757487	0.577361	1	0.510354	Mus musculus core binding factor beta (Cbfb), mRNA,	PEBP2b; Pebp2; PEA2; Pebpb2; AI893578
ILMN_1231952	LOC100044101	207.634	171.623	339.814	327.207	206.413	105.379	0.826567	0.962899	1	0.510523	PREDICTED: Mus musculus similar to thioredoxin reductase 2 (LOC100044101), mRNA,
ILMN_2684575	Pcyox1l	126.281	170.765	103.049	115.535	137.744	70.4312	1.35227	1.12116	1	0.511319	Mus musculus prenylcysteine oxidase 1 like (Pcyox1l), mRNA,	C630049M13; BC060677
ILMN_2805071	Ap4s1	409.579	156.637	622.41	340.439	399.649	204.357	0.382435	0.546969	1	0.511342	Mus musculus adaptor-related protein complex AP-4, sigma 1 (Ap4s1), mRNA,	AI314282
ILMN_1213014	Umps	286.822	156.698	1499.4	732.899	562.747	287.807	0.546327	0.488796	1	0.511433	Mus musculus uridine monophosphate synthetase (Umps), mRNA,	1700095D23Rik; AA408257; BB164745; AL033308
ILMN_2738536	Anapc5	3660.5	4412.2	5233.66	6747.36	3848.49	1969.61	1.20535	1.28923	1	0.511787	Mus musculus anaphase-promoting complex subunit 5 (Anapc5), transcript variant 1, mRNA,	AA986414; AA536819; 2510006G12Rik; Anpc5; AA408751
ILMN_1236601	Pole4	110.672	103.697	398.942	371.805	186.56	95.4806	0.936971	0.931979	1	0.511796	Mus musculus polymerase (DNA-directed), epsilon 4 (p12 subunit) (Pole4), mRNA,	2400007P05Rik; 5830430F06Rik
ILMN_2730758	Ubr7	334.447	200.642	783.7	390.803	444.202	227.442	0.599921	0.498664	1	0.512024	Mus musculus ubiquitin protein ligase E3 component n-recognin 7 (putative) (Ubr7), mRNA,	AW557761; AA589405
ILMN_2687905	Msi2	299.269	300.617	321.503	319.87	247.243	126.808	1.0045	0.994919	1	0.512888	Mus musculus Musashi homolog 2 (Drosophila) (Msi2), mRNA,	AW489193; MGC130496; 1700105C15Rik; AI451722; Msi2h; MGC118040; AI563628
ILMN_1249426	Socs4	180.157	231.135	447.807	261.621	275.387	141.288	1.28296	0.584226	1	0.513052	Mus musculus suppressor of cytokine signaling 4 (Socs4), mRNA,	AU015727; MGC143730; AU015859; A730004F22Rik; Socs7; AI427843; MGC143731; 3110032M18Rik
ILMN_1258174	Cse1l	458.46	300.272	1194.21	629.965	381.829	195.927	0.654958	0.527517	1	0.513127	Mus musculus chromosome segregation 1-like (S, cerevisiae) (Cse1l), mRNA,	AA407533; Cas; Xpo2; 2610100P18Rik; Capts
ILMN_2617478	Psip1	1195.36	1259.46	3021.5	2781.54	1510.93	775.32	1.05362	0.920585	1	0.513142	Mus musculus PC4 and SFRS1 interacting protein 1 (Psip1), mRNA,	AU015605; Psip2; AA408851; Ledgfa; Ledgfb
ILMN_2602406	2810004N20Rik	476.924	207.649	484.897	356.334	391.794	201.105	0.435392	0.734865	1	0.513294
ILMN_3160137	Aldoc	30.0874	28.4018	39.7654	33.9524	43.4513	22.3074	0.943974	0.85382	1	0.513389	Mus musculus aldolase C, fructose-bisphosphate (Aldoc), mRNA,	AI847350; AU040929; Scrg2; Aldo3
ILMN_2935237	1700027N10Rik	100.688	34.1415	75.1115	47.7712	109.539	56.2912	0.339082	0.636004	1	0.513892	Mus musculus RIKEN cDNA 1700027N10 gene (1700027N10Rik), mRNA,
ILMN_1233064	Cdk2	1014.61	663.2	2349.92	1264.57	1257.75	647.249	0.653653	0.538132	1	0.51461	Mus musculus cyclin-dependent kinase 2 (Cdk2), transcript variant 1, mRNA,	A630093N05Rik
ILMN_2466034	Ubl4	618.522	417.632	308.785	266.828	550.28	283.585	0.67521	0.864122	1	0.515348	Mus musculus ubiquitin-like 4 (Ubl4), mRNA,	DXHXS254E; DXS254E; DXS254Eh; Gdx
ILMN_2868013	Pank1	93.5207	83.9808	222.227	214.211	139.319	71.8018	0.897991	0.963931	1	0.515377	Mus musculus pantothenate kinase 1 (Pank1), transcript variant 2, mRNA,	5430426F23Rik; Pank1a; 4632412I06Rik; Pank1b; Pank; panK1beta
ILMN_1218380	Hist2h2ac	12381.7	15853.2	6674.98	8220.77	16185.8	8348.68	1.28037	1.23158	1	0.515802	Mus musculus histone cluster 2, H2ac (Hist2h2ac), mRNA,	H2a-613b
ILMN_2684307	Slc37a4	30.5857	32.1716	83.5559	85.0151	71.021	36.6483	1.05185	1.01746	1	0.516021	Mus musculus solute carrier family 37 (glucose-6-phosphate transporter), member 4 (Slc37a4), mRNA,	G6pt1; mG6PT; GSD-1b; G6PT
ILMN_2666416	Ubr7	98.1448	62.898	200.182	109.72	166.719	86.0889	0.64087	0.548099	1	0.516372	Mus musculus ubiquitin protein ligase E3 component n-recognin 7 (putative) (Ubr7), mRNA,	AW557761; AA589405
ILMN_1258394	Aars	789.705	461.502	1049.34	728.935	528.871	273.106	0.584398	0.694663	1	0.516396	Mus musculus alanyl-tRNA synthetase (Aars), mRNA,	AI316495; sti; MGC37368; C76919
ILMN_1219712	Ctps	201.594	133.555	689.574	240.065	304.109	157.064	0.662494	0.348135	1	0.516473	Mus musculus cytidine 5'-triphosphate synthase (Ctps), mRNA,
ILMN_1242013	Uck2	1163.46	822.349	1931.62	1070.14	1000.71	517.234	0.706815	0.554013	1	0.516869	Mus musculus uridine-cytidine kinase 2 (Uck2), mRNA,	UK; AI481316; AU020720; UMK; TSA903; Umpk; AU018180; AA407809
ILMN_1242054	Bard1	47.5235	36.1254	59.6594	28.1171	42.5004	21.9701	0.760158	0.471293	1	0.516938	Mus musculus BRCA1 associated RING domain 1 (Bard1), mRNA,
ILMN_1252063	Cdc25c	101.124	102.777	117.059	98.7638	94.6522	48.9805	1.01635	0.843713	1	0.517478	Mus musculus cell division cycle 25 homolog C (S, pombe) (Cdc25c), mRNA,	Cdc25
ILMN_2982969	Prim2	87.2199	87.0758	208.245	122.551	117.013	60.6546	0.998349	0.588494	1	0.51836	Mus musculus DNA primase, p58 subunit (Prim2), mRNA,	AI323589
ILMN_2903734	Siah1b	64.788	53.4544	160.815	69.8705	77.3521	40.1138	0.825066	0.434477	1	0.518588	Mus musculus seven in absentia 1B (Siah1b), mRNA,	AA960570; Sinh1b
ILMN_2731473	Fanci	66.3946	67.9835	95.4717	70.8419	68.8277	35.703	1.02393	0.742019	1	0.51873	Mus musculus Fanconi anemia, complementation group I (Fanci), mRNA,	MGC38195; MGC38407
ILMN_2896049	Npepl1	432.539	397.748	801.777	643.34	371.804	192.999	0.919565	0.802393	1	0.519088	Mus musculus aminopeptidase-like 1 (Npepl1), mRNA,	BC023239; C85514; mKIAA1974
ILMN_2752009	Mcm4	32.2937	26.3495	80.9874	41.4371	40.8994	21.2443	0.815933	0.511649	1	0.519429	Mus musculus minichromosome maintenance deficient 4 homolog (S, cerevisiae) (Mcm4), mRNA,	mcdc21; KIAA4003; AI325074; 19G; Mcmd4; Cdc21; mKIAA4003; AU045576
ILMN_2937184	Pkmyt1	49.3432	59.5315	54.9874	35.8647	44.3938	23.0937	1.20648	0.652234	1	0.520202	Mus musculus protein kinase, membrane associated tyrosine/threonine 1 (Pkmyt1), mRNA,	6230424P17; Myt1; AW209059
ILMN_2743503	E2f3	103.99	73.1572	208.117	92.2454	83.0936	43.246	0.7035	0.443238	1	0.520449	Mus musculus E2F transcription factor 3 (E2f3), mRNA,	E2F3b; E2f3a; mKIAA0075
ILMN_2781170	Usp1	277.733	179.635	1467.16	613.052	460.289	239.778	0.646789	0.41785	1	0.520928	Mus musculus ubiquitin specific peptdiase 1 (Usp1), mRNA,	MGC25559
ILMN_2722438	Ccnf	70.8735	55.4068	72.6861	59.462	64.0875	33.3855	0.781771	0.818066	1	0.520936	Mus musculus cyclin F (Ccnf), mRNA,	CycF
ILMN_1215647	Mum1	1195.69	1183.61	1800.71	1818.74	1207.46	629.124	0.9899	1.01001	1	0.521031	Mus musculus melanoma associated antigen (mutated) 1 (Mum1), mRNA,	9430059D04Rik; 2610019J09; UBE-1C2
ILMN_1234909	Tipin	80.5713	54.7298	270.936	129.037	78.4345	40.8747	0.679271	0.476263	1	0.521132	Mus musculus timeless interacting protein (Tipin), mRNA,	1110018P21Rik; 1110005A05Rik
ILMN_1256671	Hnrnph1	381.823	496.067	1380.71	1373.11	678.813	353.766	1.29921	0.994493	1	0.521155	Mus musculus heterogeneous nuclear ribonucleoprotein H1 (Hnrnph1), mRNA,	Hnrnph; AI642080; E430005G16Rik
ILMN_1223126	Fadd	157.893	133.683	274.624	292.376	158.167	82.4681	0.846668	1.06464	1	0.521399	Mus musculus Fas (TNFRSF6)-associated via death domain (Fadd), mRNA,	Mort1/FADD
ILMN_1233478	6230416J20Rik	184.699	144.931	555.111	285.326	189.648	98.892	0.784689	0.513998	1	0.52145	Mus musculus RIKEN cDNA 6230416J20 gene (6230416J20Rik), mRNA,	mKIAA1574; D4Ertd27e; RP23-95O1,3; 9830144E06
ILMN_2741726	Lsm2	825.304	382.841	883.315	321.204	888.728	463.581	0.463879	0.363635	1	0.521623	Mus musculus LSM2 homolog, U6 small nuclear RNA associated (S, cerevisiae) (Lsm2), mRNA,	SmX5; D17H6S56E-2; G7b; snRNP; Dmapl; D17H6S56E2; Sm-X5; MGC13889; Dmpkap
ILMN_2897424	Zfp367	31.2185	28.3528	97.7319	46.6377	44.7419	23.3449	0.908206	0.477201	1	0.521768	Mus musculus zinc finger protein 367 (Zfp367), mRNA,	ZFF29a; ZFF29b; 8030486J21Rik
ILMN_2986393	Tuba1b	11997.9	10508.7	21887.3	14834	16298.2	8510.76	0.875879	0.677744	1	0.522191	Mus musculus tubulin, alpha 1B (Tuba1b), mRNA,	MGC102558; MGC118411; Tuba2; MGC117866
ILMN_1217753	Srpk1	995.759	881.695	1334.87	680.624	803.684	419.702	0.885451	0.509881	1	0.522223	Mus musculus serine/arginine-rich protein specific kinase 1 (Srpk1), mRNA,	AU017960
ILMN_2934549	BC055324	103.052	97.4231	178.69	120.555	100.886	52.6949	0.94538	0.67466	1	0.52232	Mus musculus cDNA sequence BC055324 (BC055324), mRNA,	MGC65590
ILMN_1225182	Cdca3	1277.92	1098.42	1580.3	1462.65	1256.05	656.818	0.859543	0.92555	1	0.522923	Mus musculus cell division cycle associated 3 (Cdca3), mRNA,	Tome-1; 2410005A12Rik; Grcc8; C8
ILMN_1259068	Rab11b	1120.33	991.88	2531.18	2955.1	1320.18	690.663	0.885343	1.16748	1	0.523157	Mus musculus RAB11B, member RAS oncogene family (Rab11b), mRNA,	A730055L17Rik
ILMN_2707147	Rangrf	779.028	330.24	559.358	309.885	584.831	305.987	0.423912	0.554002	1	0.523206	Mus musculus RAN guanine nucleotide release factor (Rangrf), mRNA,	RP23-396M19,8; Mog1; MGC107268; 2400006H24Rik; Rangnrf
ILMN_1216801	Tipin	33.9409	30.7283	122.271	66.7328	56.3071	29.483	0.905349	0.545776	1	0.523611	Mus musculus timeless interacting protein (Tipin), mRNA,	1110018P21Rik; 1110005A05Rik
ILMN_2610835	Smc1a	88.5863	80.2514	216.058	195.473	125.025	65.5191	0.905913	0.904723	1	0.524049	Mus musculus structural maintenance of chromosomes 1A (Smc1a), mRNA,	SMCB; KIAA0178; mKIAA0178; SB1,8; Smc1l1; Smc1alpha; 5830426I24Rik; Smc1
ILMN_3127704	1500010J02Rik	140.766	188.527	126.322	104.958	123.873	64.9248	1.33929	0.830873	1	0.524123	Mus musculus RIKEN cDNA 1500010J02 gene (1500010J02Rik), transcript variant 1, mRNA,	RP23-19I2,2
ILMN_2669404	Lmnb2	276.782	345.865	449.412	282.528	323.612	169.668	1.24959	0.628662	1	0.524295	Mus musculus lamin B2 (Lmnb2), mRNA,
ILMN_2701515	Lrrk1	325.01	86.6158	322.467	117.697	233.664	122.616	0.266502	0.364989	1	0.524753	Mus musculus leucine-rich repeat kinase 1 (Lrrk1), mRNA,	mKIAA1790; MGC28646; D130026O16Rik; C230002E15Rik; AW319595
ILMN_2631514	BC017612	128.226	87.3214	237.05	316.081	261.372	137.393	0.680998	1.33339	1	0.525661	Mus musculus cDNA sequence BC017612 (BC017612), mRNA,	Fn5
ILMN_2720229	Lmnb1	73.337	49.1392	231.204	102.063	132.85	69.8854	0.670047	0.441442	1	0.526049	Mus musculus lamin B1 (Lmnb1), mRNA,
ILMN_3074985	H2afz	4248.34	3708.33	7553.07	8301.6	6898.56	3629.53	0.872889	1.0991	1	0.526129	Mus musculus H2A histone family, member Z (H2afz), mRNA,	H2A,Z
ILMN_2690319	Clspn	32.8977	32.4716	77.8663	41.1856	46.1955	24.3207	0.987047	0.528928	1	0.526474	Mus musculus claspin homolog (Xenopus laevis) (Clspn), mRNA,	E130314M08Rik; C85083; CLASPIN; B130025E01
ILMN_2669343	Sass6	118.467	109.056	220.701	141.244	106.432	56.0404	0.920562	0.639979	1	0.526538	Mus musculus spindle assembly 6 homolog (C, elegans) (Sass6), mRNA,	2810453L12Rik
ILMN_2978009	N4bp2	128.481	222.05	124.663	163.573	92.5694	48.7832	1.72827	1.31213	1	0.526991	Mus musculus NEDD4 binding protein 2 (N4bp2), mRNA,	Gm868; E430014I16; N4bp2; Gm1791
ILMN_2766279	1500010J02Rik	468.343	601.941	599.014	756.347	466.009	245.862	1.28526	1.26265	1	0.527591	Mus musculus RIKEN cDNA 1500010J02 gene (1500010J02Rik), transcript variant 1, mRNA,	RP23-19I2,2
ILMN_2755224	Cdca4	90.6916	64.6082	263.667	132.683	201.22	106.191	0.712395	0.503223	1	0.527735	Mus musculus cell division cycle associated 4 (Cdca4), mRNA,	SEI-3; 2410018C03Rik; HEPP
ILMN_1249301	Bckdk	392.357	332.615	349.321	276.608	273.637	144.452	0.847736	0.791846	1	0.527897	Mus musculus branched chain ketoacid dehydrogenase kinase (Bckdk), nuclear gene encoding mitochondrial protein, mRNA,	AI327402
ILMN_1255006	Rpe	54.378	199.867	94.2902	307.781	68.7844	36.3132	3.67551	3.26419	1	0.527928	Mus musculus ribulose-5-phosphate-3-epimerase (Rpe), mRNA,	5730518J08Rik; 2810429B02Rik
ILMN_1244291	Gja1	25.6943	23.2982	23.2077	29.9073	72.5593	38.3111	0.906747	1.28868	1	0.527996	Mus musculus gap junction membrane channel protein alpha 1 (Gja1), mRNA,	Npm1; Cx43; Cnx43; connexin43; Cx43alpha1; Gja-1; AU042049; AW546267
ILMN_1213101	Lig1	47.4166	43.3382	45.4558	36.8809	47.7407	25.2127	0.913989	0.811359	1	0.528119	Mus musculus ligase I, DNA, ATP-dependent (Lig1), mRNA,	LigI; AL033288; mLigI
ILMN_2708357	Nt5c3l	154.415	120.703	320.416	258.177	251.905	133.549	0.781675	0.805755	1	0.530155	Mus musculus 5'-nucleotidase, cytosolic III-like (Nt5c3l), mRNA,	2610037D24Rik; AI841843; C330027I04Rik
ILMN_2672767	Actn4	216.388	226.408	199.411	214.308	193.061	102.354	1.04631	1.07471	1	0.530165	Mus musculus actinin alpha 4 (Actn4), mRNA,	C77391; MGC102374
ILMN_2672442	Ccna2	37.7115	30.3433	144.064	66.1208	42.08	22.3243	0.804616	0.458967	1	0.530521	Mus musculus cyclin A2 (Ccna2), mRNA,	Ccna; Cyca; AA408589; Ccn-1; Ccn1
ILMN_2936496	Kif24	55.6464	45.3176	59.7136	35.9953	62.5551	33.2119	0.814385	0.602799	1	0.530922	Mus musculus kinesin family member 24 (Kif24), mRNA,	4933425J19Rik; 9430029L23Rik
ILMN_2628175	Tsen34	155.971	119.071	219.298	173.875	169.337	90.0127	0.763419	0.792872	1	0.531558	Mus musculus tRNA splicing endonuclease 34 homolog (S, cerevisiae) (Tsen34), mRNA,	0610027F08Rik; Leng5
ILMN_2708297	Mtch1	72.2813	97.8168	138.744	221.527	130.904	69.7751	1.35328	1.59665	1	0.533027	Mus musculus mitochondrial carrier homolog 1 (C, elegans) (Mtch1), nuclear gene encoding mitochondrial protein, mRNA,	AU018396; C77849; AI255158; 2310034O17Rik; PSAP
ILMN_1234318	Ubxn6	230.781	276.358	284.332	608.861	239.938	127.925	1.19749	2.14137	1	0.53316	Mus musculus UBX domain protein 6 (Ubxn6), mRNA,	Ubxdc2; 2210415J11Rik; AU040909; 1200008L11Rik
ILMN_1229321	Ube2c	56.4736	44.1077	102.358	61.5377	71.8036	38.2901	0.781032	0.601203	1	0.533261	Mus musculus ubiquitin-conjugating enzyme E2C (Ube2c), mRNA,	D2Ertd695e; 1110015A16Rik
ILMN_2594521	Nsdhl	35.0891	31.9631	119.221	104.782	83.0974	44.3515	0.910912	0.878893	1	0.53373	Mus musculus NAD(P) dependent steroid dehydrogenase-like (Nsdhl), mRNA,	H105E3; Str; XAP104; Bpa; AI747449
ILMN_1247268	Zwilch	42.3391	60.4054	123.608	95.3289	54.5279	29.1128	1.4267	0.771218	1	0.533906	Mus musculus Zwilch, kinetochore associated, homolog (Drosophila) (Zwilch), mRNA,	2310031L18Rik
ILMN_3086201	2610507B11Rik	43.7069	44.0597	58.7475	62.2795	48.0142	25.6404	1.00807	1.06012	1	0.534017	Mus musculus RIKEN cDNA 2610507B11 gene (2610507B11Rik), mRNA,	AU022687; D11Bhm178e; E1; D11Bhm179e; mKIAA0100; KIAA0100; RP23-185A18,9
ILMN_2911781	Kif18a	100.448	64.135	507.013	301.596	202.333	108.084	0.638489	0.594848	1	0.534188	Mus musculus kinesin family member 18A (Kif18a), mRNA,	MGC27627; AU024633; B130001M12Rik
ILMN_2663015	Abcb8	143.537	149.372	148.929	155.173	138.427	74.0983	1.04066	1.04193	1	0.535286	Mus musculus ATP-binding cassette, sub-family B (MDR/TAP), member 8 (Abcb8), nuclear gene encoding mitochondrial protein, mRNA,	AA409895; 4833412N02Rik
ILMN_1251930	Nasp	329.695	190.495	808.822	692.807	400.463	214.652	0.577792	0.856563	1	0.536009	Mus musculus nuclear autoantigenic sperm protein (histone-binding) (Nasp), transcript variant 2, mRNA,	5033430J04Rik; AI317140; AI131596; D4Ertd767e; Epcs32
ILMN_1232404	Zadh2	159.017	169.089	254.385	241.339	283.244	152.014	1.06334	0.948716	1	0.536689	Mus musculus zinc binding alcohol dehydrogenase, domain containing 2 (Zadh2), mRNA,	C530046K17Rik; MGC32469
ILMN_1255323	2510012J08Rik	143.469	157.617	110.08	87.2226	110.786	59.4584	1.09861	0.792353	1	0.536695	Mus musculus RIKEN cDNA 2510012J08 gene (2510012J08Rik), mRNA,
ILMN_2420070	Tubg1	433.283	349.409	612.382	544.8	312.007	167.513	0.806422	0.889641	1	0.536889	Mus musculus tubulin, gamma 1 (Tubg1), mRNA,	AI451582; AI503389; Tubg; MGC8041; 1500010O08Rik
ILMN_2646985	Atf5	117.77	106.018	214.379	122.689	88.3904	47.498	0.900212	0.572297	1	0.537366	Mus musculus activating transcription factor 5 (Atf5), mRNA,	AFTA; Atf7; MGC102397; Atfx; ODA-10
ILMN_2524776	2400006N03Rik	117.79	82.6922	137.072	114.536	148.75	79.971	0.702031	0.835592	1	0.53762
ILMN_3102643	Tdg	101.7	78.1177	279.253	161.035	128.327	69.0019	0.768116	0.576662	1	0.537705	Mus musculus thymine DNA glycosylase (Tdg), transcript variant 1, mRNA,	JZA-3; Jza1; E130317C12Rik
ILMN_2880943	Nudt5	1137.47	580.452	2000.26	918.205	1058.05	569.005	0.510302	0.459044	1	0.537785	Mus musculus nudix (nucleoside diphosphate linked moiety X)-type motif 5 (Nudt5), mRNA,
ILMN_1220874	5330401P04Rik	71.5889	61.388	105.753	87.5223	106.227	57.1604	0.857507	0.827613	1	0.538097	Mus musculus RIKEN cDNA 5330401P04 gene (5330401P04Rik), mRNA,	9830163O08
ILMN_1233065	Rbmx	256.559	204.221	478.693	228.989	209.406	112.706	0.795999	0.478362	1	0.538217	Mus musculus RNA binding motif protein, X chromosome (Rbmx), mRNA,
ILMN_2922942	3000004C01Rik	182.288	158.885	235.179	144.296	183.141	98.5935	0.87161	0.613559	1	0.538348	Mus musculus RIKEN cDNA 3000004C01 gene (3000004C01Rik), mRNA,
ILMN_2680463	1500019G21Rik	204.247	94.512	285.151	175.499	188.015	101.224	0.462733	0.615462	1	0.538383	Mus musculus RIKEN cDNA 1500019G21 gene (1500019G21Rik), mRNA,	Hspbp1
ILMN_2959974	Cdan1	381.814	497.637	469.789	587.111	320.963	172.972	1.30335	1.24973	1	0.538917	Mus musculus congenital dyserythropoietic anemia, type I (human) (Cdan1), mRNA, XM_925221 XM_985468 XM_985530 XM_985568	CDA1; MGC144128; AI448026; 1500015A01Rik; CDA-I; AW492297; CDAI
ILMN_2714678	Pif1	281.148	166.029	422.644	271.687	282.92	153.043	0.59054	0.642827	1	0.540941	Mus musculus PIF1 5'-to-3' DNA helicase homolog (S, cerevisiae) (Pif1), mRNA,	4631410M14; AI449441
ILMN_2592010	9530058B02Rik	398.412	236.278	375.952	169.209	368.796	199.507	0.593051	0.450081	1	0.540968	Mus musculus RIKEN cDNA 9530058B02 gene (9530058B02Rik), mRNA,
ILMN_2416145	Tpx2	138.914	117.362	499.391	317.828	229.462	124.226	0.844854	0.636431	1	0.541378	Mus musculus TPX2, microtubule-associated protein homolog (Xenopus laevis) (Tpx2), mRNA,	2610005B21Rik; DIL2; p100; REPP86
ILMN_2695819	Ddit4l	38.0797	31.6693	40.3064	84.7516	55.1166	29.8411	0.831659	2.10268	1	0.541418	Mus musculus DNA-damage-inducible transcript 4-like (Ddit4l), mRNA,	RTP801L; 1700108M02Rik; 1700037B15Rik; Smhs1; REDD2
ILMN_2806124	Pih1d1	410.84	408.745	430.819	569.233	356.292	192.935	0.994899	1.32128	1	0.541508	Mus musculus PIH1 domain containing 1 (Pih1d1), mRNA,	4933413A04Rik; Nop17; 1110061L23Rik
ILMN_1218315	Zfp473	48.6755	37.8347	55.1052	35.3925	58.09	31.46	0.777284	0.642273	1	0.541573	Mus musculus zinc finger protein 473 (Zfp473), mRNA,	4932441F21; D030014N22Rik
ILMN_1221503	Ccnd1	1101.7	868.179	1383.57	427.757	1323	716.607	0.788036	0.309169	1	0.541653
ILMN_2611159	Stard7	25.6903	25.9749	49.3344	49.9927	40.5989	22.001	1.01108	1.01334	1	0.541911	Mus musculus START domain containing 7 (Stard7), mRNA,	AL022671; AW544915; MGC27663; AI852671
ILMN_2781458	Tlcd1	72.39	46.8857	100.147	90.2905	89.4143	48.4635	0.647683	0.901583	1	0.542011	Mus musculus TLC domain containing 1 (Tlcd1), mRNA,	AA690150; AU015616; 0610030G03Rik; RP23-185A18,3; 0610007A15Rik
ILMN_1220219	Tuba3a	46.8588	48.2809	53.9747	62.3202	57.846	31.3624	1.03035	1.15462	1	0.542171	Mus musculus tubulin, alpha 3A (Tuba3a), mRNA,	M[a]3; AI528779; Tuba3; MGC107295
ILMN_2826342	5730453I16Rik	393.788	595.355	663.579	682.572	352.008	190.912	1.51187	1.02862	1	0.542351	Mus musculus RIKEN cDNA 5730453I16 gene (5730453I16Rik), mRNA,	C330017N18Rik; MGC46982; AL022757
ILMN_1257332	Mkks	219.947	130.088	257.548	217.833	259.89	141.011	0.59145	0.845795	1	0.542582	Mus musculus McKusick-Kaufman syndrome protein (Mkks), mRNA,	AI957237; Bbs6; 1300013E18Rik; MGC143766; AI463362
ILMN_2591626	Rbm10	56.1864	49.6366	96.5454	73.0671	77.074	41.8193	0.883428	0.756816	1	0.542586	Mus musculus RNA binding motif protein 10 (Rbm10), mRNA,	E430039K10Rik; mKIAA0122; MGC7826
ILMN_2625746	Ncapd2	113.494	118.125	127.475	85.803	114.396	62.1616	1.0408	0.673097	1	0.543392	Mus musculus non-SMC condensin I complex, subunit D2 (Ncapd2), mRNA,	MGC39046; mKIAA0159; CAP-D2; 2810406C15Rik; CNAP1
ILMN_2721221	Pcnt	70.0524	122.774	66.5913	80.4107	68.6331	37.3268	1.75259	1.20752	1	0.54386	Mus musculus pericentrin (kendrin) (Pcnt), transcript variant 1, mRNA,	kendrin; C86676; AW476095; KEN; Pcnt2
ILMN_2982958	Sae1	570.849	374.076	913.062	517.02	552.535	300.81	0.655297	0.566248	1	0.544418	Mus musculus SUMO1 activating enzyme subunit 1 (Sae1), mRNA,	2400010M20Rik; Uble1a; AW743391; AOS1; AL033372; HSPC140; Sua1; 2610044L12Rik; D7Ertd177e
ILMN_2894450	Snx15	194.392	195.62	241.243	239.227	183.978	100.202	1.00632	0.991644	1	0.544638	Mus musculus sorting nexin 15 (Snx15), mRNA,	E130013C21Rik; 1500032B08Rik
ILMN_2743013	Ncf4	252.143	26.5333	325.058	101.74	292.827	159.601	0.105231	0.312991	1	0.545034	Mus musculus neutrophil cytosolic factor 4 (Ncf4), mRNA,	AI451400; p40phox
ILMN_1252819	Prmt7	164.994	157.115	384.3	269.192	240.493	131.223	0.952248	0.700474	1	0.545643	Mus musculus protein arginine N-methyltransferase 7 (Prmt7), mRNA,	4933402B05Rik; BC006705; MGC7929
ILMN_2988199	Gm885	90.431	44.3717	172.783	82.156	95.5421	52.1745	0.490669	0.475486	1	0.546089	Mus musculus gene model 885, (NCBI) (Gm885), mRNA,
ILMN_1256514	Dus3l	214.201	155.922	297.226	200.15	177.541	97.0515	0.727925	0.673393	1	0.546644	Mus musculus dihydrouridine synthase 3-like (S, cerevisiae) (Dus3l), mRNA, XM_978180 XM_978219 XM_978263	MGC56820; AI662135; AW557805
ILMN_2694074	Gins4	682.254	500.114	1054	811.865	662.976	362.483	0.733033	0.770271	1	0.546752	Mus musculus GINS complex subunit 4 (Sld5 homolog) (Gins4), mRNA,	Sld5; 4933405K01Rik; 2810037C03Rik
ILMN_2633492	Chek2	96.307	74.04	136.104	79.7275	107.341	58.7081	0.768792	0.585784	1	0.546931	Mus musculus CHK2 checkpoint homolog (S, pombe) (Chek2), mRNA,	CHK2; Rad53; HUCDS1; Cds1
ILMN_1256564	Ak3l1	102.611	69.6551	294.333	86.1247	270.455	147.992	0.678827	0.29261	1	0.547196	Mus musculus adenylate kinase 3-like 1 (Ak3l1), nuclear gene encoding mitochondrial protein, mRNA,	Ak-3; Ak-4; Ak3; D4Ertd274e; Ak4
ILMN_2809436	5730410I19Rik	204.773	143.089	576.004	290.067	329.208	180.513	0.69877	0.503585	1	0.548326	Mus musculus RIKEN cDNA 5730410I19 gene (5730410I19Rik), mRNA,	AW557761; AA589405
ILMN_1223734	Atf4	427.784	451.636	1062.45	1031.6	685.635	376.051	1.05576	0.970964	1	0.548471	Mus musculus activating transcription factor 4 (Atf4), mRNA,	TAXREB67; MGC96460; CREB2; Atf-4; C/ATF
ILMN_1228999	Ruvbl1	216.358	103.606	1145.59	566.808	394.631	216.472	0.478864	0.494775	1	0.548542	Mus musculus RuvB-like protein 1 (Ruvbl1), mRNA,	Tip49a; 2510009G06Rik; Pontin52
ILMN_2681474	Lmtk2	714.381	333.931	1249.81	581.504	1221.09	669.902	0.467441	0.465272	1	0.548612	Mus musculus lemur tyrosine kinase 2 (Lmtk2), mRNA,	A330101P12Rik; cprk; 2900041G10Rik; aatyk2; KPI-2; BREK; KPI2
ILMN_1217353	Rfx2	90.0901	105.721	111.17	78.6717	119.119	65.3511	1.1735	0.70767	1	0.548621	Mus musculus regulatory factor X, 2 (influences HLA class II expression) (Rfx2), mRNA,	5430432H19Rik
ILMN_2837855	Cbfb	924.895	465.15	2525.03	1478.5	1507.9	827.348	0.502921	0.585539	1	0.548674	Mus musculus core binding factor beta (Cbfb), mRNA,	PEBP2b; Pebp2; PEA2; Pebpb2; AI893578
ILMN_2589960	Gins3	59.7396	48.9689	148.331	53.9384	76.9971	42.2636	0.819706	0.363636	1	0.548899	Mus musculus GINS complex subunit 3 (Psf3 homolog) (Gins3), mRNA,	2700085M18Rik; AI616142
ILMN_2729263	Coq7	343.414	93.6738	373.327	168.428	692.629	380.947	0.272773	0.451154	1	0.550003	Mus musculus demethyl-Q 7 (Coq7), mRNA,	clk-1
ILMN_2484527	Vegfa	65.4026	64.4656	168.12	103.463	210.568	115.875	0.985673	0.61541	1	0.550295	Mus musculus vascular endothelial growth factor A (Vegfa), transcript variant 2, mRNA,	VEGF120; VPF; VEGF-A; Vegf
ILMN_2605566	Sdccag3	38.2716	40.656	94.6587	101.359	54.7603	30.1432	1.0623	1.07078	1	0.550458	Mus musculus serologically defined colon cancer antigen 3 (Sdccag3), transcript variant 4, mRNA,	C330016H24Rik; C630038K21Rik; RP23-306D20,6
ILMN_2780915	Prmt7	257.596	198.144	326.923	209.95	222.743	122.631	0.769207	0.642201	1	0.550548	Mus musculus protein arginine N-methyltransferase 7 (Prmt7), mRNA,	4933402B05Rik; BC006705; MGC7929
ILMN_2957070	Shc1	536.247	460.407	987.603	893.538	605.987	333.757	0.858573	0.904755	1	0.550765	Mus musculus src homology 2 domain-containing transforming protein C1 (Shc1), mRNA,	p66; ShcA; Shc
ILMN_1250574	Nup43	603.637	351.3	987.353	403.184	501.599	276.474	0.581972	0.408348	1	0.551187	Mus musculus nucleoporin 43 (Nup43), mRNA,	AA409950; p42; 43kDa; 2610529I12Rik; 2610016K01Rik
ILMN_1232209	Nampt	29.0043	33.0511	100.252	69.4359	49.2608	27.1552	1.13953	0.692613	1	0.551254	Mus musculus nicotinamide phosphoribosyltransferase (Nampt), mRNA,	Visfatin; Pbef; AI314458; 1110035O14Rik; Nampt
ILMN_2904819	9530058B02Rik	370.312	219.324	315.295	140.627	243.027	134	0.59227	0.446017	1	0.551378	Mus musculus RIKEN cDNA 9530058B02 gene (9530058B02Rik), mRNA,
ILMN_1240544	Lzic	227.414	141.681	287.895	209.978	236.75	130.577	0.623008	0.729355	1	0.551541	Mus musculus leucine zipper and CTNNBIP1 domain containing (Lzic), mRNA,	1810030J04Rik; AW047580
ILMN_2778094	Rassf7	46.4605	44.7623	44.2373	53.6932	49.808	27.4756	0.963447	1.21375	1	0.55163	Mus musculus Ras association (RalGDS/AF-6) domain family (N-terminal) member 7 (Rassf7), mRNA,	2400009B11Rik; AW210608
ILMN_2685806	Banf1	703.799	490.361	896.049	710.988	1018.76	561.981	0.696734	0.79347	1	0.551631	Mus musculus barrier to autointegration factor 1 (Banf1), transcript variant 1, mRNA,	Bcrp1; Baf; L2bp1/Baf; C78287
ILMN_3024099	Seh1l	89.8299	88.9976	206.83	209.75	148.67	82.0959	0.990734	1.01412	1	0.552203	Mus musculus SEH1-like (S, cerevisiae (Seh1l), transcript variant 1, mRNA,	Seh1; SEH1A; SEH1B; 2610007A16Rik; SEC13L; AW540070
ILMN_2588610	Chmp7	631.736	602.811	920.15	1093.21	646.678	357.114	0.954213	1.18808	1	0.552228	Mus musculus CHMP family, member 7 (Chmp7), mRNA,	AW550775; 4930596K11Rik; 6330407G04Rik; AI450338; MGC29816
ILMN_2856861	Nudc-ps1	194.488	134.063	292.424	172.213	179.552	99.1919	0.68931	0.588914	1	0.552442	Mus musculus nuclear distribution gene C homolog (Aspergillus), pseudogene 1 (Nudc-ps1), non-coding RNA,	AL022907
ILMN_2431046	Ubac1	180.575	188.833	280.75	301.642	180.643	99.8843	1.04573	1.07441	1	0.552937	Mus musculus ubiquitin associated domain containing 1 (Ubac1), mRNA,	Ubadc1; GBDR1; AA407978; Gdbr1; 1110033G07Rik
ILMN_2732827	LOC100047155	1225.95	575.77	2201.79	961.665	1165.29	644.382	0.469652	0.436764	1	0.552982	PREDICTED: Mus musculus similar to Small nuclear ribonucleoprotein polypeptide A (LOC100047155), mRNA,
ILMN_1244324	Hdgf	451.939	252.995	255.388	142.689	473.038	261.644	0.559798	0.558712	1	0.553114	Mus musculus hepatoma-derived growth factor (Hdgf), mRNA,	AI118077; D3Ertd299e
ILMN_1218767	Hnrnph1	896.918	1144.21	2780.89	2653.86	1152.04	637.33	1.27571	0.95432	1	0.553218	Mus musculus heterogeneous nuclear ribonucleoprotein H1 (Hnrnph1), mRNA,	Hnrnph; AI642080; E430005G16Rik
ILMN_3160302	U2af1l4	71.4736	46.0407	71.7383	68.9846	68.0121	37.6288	0.644163	0.961614	1	0.553266	Mus musculus U2 small nuclear RNA auxiliary factor 1-like 4 (U2af1l4), mRNA,	U2af26; AF419339; AA407033; AI451269; AW553050
ILMN_2662509	Fadd	171.545	145.802	280.892	331.552	167.044	92.4467	0.849931	1.18035	1	0.553426	Mus musculus Fas (TNFRSF6)-associated via death domain (Fadd), mRNA,	Mort1/FADD
ILMN_2836654	Hist1h2ao	12307	16355.5	8974.93	9822.28	16728.6	9261.58	1.32895	1.09441	1	0.553637	Mus musculus histone cluster 1, H2ao (Hist1h2ao), mRNA,
ILMN_1220228	Prmt7	63.9825	54.5488	279.767	187.075	131.816	73.0072	0.852559	0.668682	1	0.553856	Mus musculus protein arginine N-methyltransferase 7 (Prmt7), mRNA,	4933402B05Rik; BC006705; MGC7929
ILMN_2756550	Slc12a3	50.9111	21.8143	42.2287	25.037	117.355	65.0375	0.428478	0.59289	1	0.554196	Mus musculus solute carrier family 12, member 3 (Slc12a3), mRNA,	NCCT; NCC; TSC; AI035291
ILMN_1258600	LOC100043671	820.309	651.369	1317.84	1130.74	725.036	401.813	0.794054	0.858024	1	0.554197	PREDICTED: Mus musculus hypothetical protein LOC100043671 (LOC100043671), mRNA,
ILMN_2752940	Dhcr24	156.362	138.505	126.321	80.1383	59.6979	33.0896	0.8858	0.634403	1	0.554285	Mus musculus 24-dehydrocholesterol reductase (Dhcr24), mRNA,	mKIAA0018; 2310076D10Rik; 5830417J06Rik
ILMN_2756474	Amz1	76.1434	33.6829	75.5843	32.196	60.7589	33.6835	0.442361	0.425962	1	0.554379	Mus musculus archaelysin family metallopeptidase 1 (Amz1), mRNA,	5330426I05; Amz1
ILMN_2628188	Fgfr1op2	172.92	142.368	324.342	284.77	231.111	128.13	0.823321	0.877992	1	0.554411	Mus musculus FGFR1 oncogene partner 2 (Fgfr1op2), mRNA,	1500031J01Rik
ILMN_2598852	Ranbp1	4644.38	2704.19	5835.21	2861.4	4407.23	2444.65	0.58225	0.490367	1	0.55469	Mus musculus RAN binding protein 1 (Ranbp1), mRNA,	Htf9a
ILMN_2776231	Sumo3	232.162	213.719	532.763	520.201	335.132	185.902	0.920561	0.976421	1	0.554711	Mus musculus SMT3 suppressor of mif two 3 homolog 3 (yeast) (Sumo3), mRNA,	2810014B19Rik; SMT3A; AW121497; SUMO-3; D10Ertd345e; AA409334; AW536077; Smt3h1
ILMN_1233857	Mcm6	950.995	514.03	2274.41	916.597	1111.04	616.333	0.540518	0.403004	1	0.554735	Mus musculus minichromosome maintenance deficient 6 (MIS5 homolog, S, pombe) (S, cerevisiae) (Mcm6), mRNA,	ASP-l1; Mcmd6; D1Wsu22e
ILMN_2745005	Gpn3	435.06	292.902	770.446	411.346	540.189	299.716	0.673245	0.533906	1	0.554835	Mus musculus GPN-loop GTPase 3 (Gpn3), mRNA,	D5Ertd708e; A930018B01Rik
ILMN_2740268	Otub2	184.229	70.029	269.788	138.128	226.736	125.832	0.380119	0.511988	1	0.554969	Mus musculus OTU domain, ubiquitin aldehyde binding 2 (Otub2), mRNA,	OTB2; AI413508; AW557219; 2010015L18Rik; OTU2; 4930586I02Rik
ILMN_2731974	Foxm1	124.638	112.887	122.264	84.9083	139.852	77.6603	0.90572	0.694469	1	0.555302
ILMN_2982250	Mre11a	44.177	40.6507	55.7629	36.7115	46.9763	26.1092	0.920177	0.658349	1	0.555795	Mus musculus meiotic recombination 11 homolog A (S, cerevisiae) (Mre11a), mRNA,	Mre11b; Mre11
ILMN_2952098	Snhg11	32.2475	32.1749	28.0855	27.3048	34.5906	19.2329	0.997748	0.972203	1	0.556015	Mus musculus small nucleolar RNA host gene 11 (non-protein coding) (Snhg11), mRNA,	E130013N09Rik; AL022637; AW319638; RP23-132A3,1; AI854265
ILMN_1247062	Chek2	30.3798	25.976	64.6095	48.5858	42.1981	23.4712	0.855041	0.751992	1	0.556216	Mus musculus CHK2 checkpoint homolog (S, pombe) (Chek2), mRNA,	CHK2; Rad53; HUCDS1; Cds1
ILMN_2666483	Ruvbl1	1385.31	678.442	1692.01	786.789	1008.01	560.828	0.489741	0.465004	1	0.55637	Mus musculus RuvB-like protein 1 (Ruvbl1), mRNA,	Pontin52; Tip49a; 2510009G06Rik
ILMN_1247613	Pole3	346.423	281.821	359.376	259.538	354.416	197.189	0.813517	0.722191	1	0.556378	Mus musculus polymerase (DNA directed), epsilon 3 (p17 subunit) (Pole3), mRNA,	YBL1; 1810034K18Rik
ILMN_2688923	Hnrnph1	602.879	838.14	2256.27	2217.27	1114.1	619.887	1.39023	0.982716	1	0.556401	Mus musculus heterogeneous nuclear ribonucleoprotein H1 (Hnrnph1), mRNA,	Hnrnph; AI642080; E430005G16Rik
ILMN_2757743	Cbfb	936.064	450.507	2636.54	1593.66	1435.84	799.942	0.481277	0.604449	1	0.557125	Mus musculus core binding factor beta (Cbfb), mRNA,	PEBP2b; Pebp2; PEA2; Pebpb2; AI893578
ILMN_2867427	Rad50	337.877	324.112	617.128	414.383	342.016	190.55	0.95926	0.671469	1	0.557137	Mus musculus RAD50 homolog (S, cerevisiae) (Rad50), mRNA,	Rad50l; Mrell
ILMN_2635367	Shcbp1	31.5007	32.1625	99.0222	61.1018	35.3549	19.71	1.02101	0.617052	1	0.557489	Mus musculus Shc SH2-domain binding protein 1 (Shcbp1), mRNA,	mPAL
ILMN_1236125	Mcm6	29.2105	29.6187	229.53	111.131	68.8649	38.4009	1.01397	0.484165	1	0.557626	Mus musculus minichromosome maintenance deficient 6 (MIS5 homolog, S, pombe) (S, cerevisiae) (Mcm6), mRNA,	ASP-l1; Mcmd6; D1Wsu22e
ILMN_2878355	Kpna2	47.9332	40.7099	481.666	299.438	177.055	98.7496	0.849306	0.621671	1	0.557732	Mus musculus karyopherin (importin) alpha 2 (Kpna2), mRNA,	IPOA1; Rch1; 2410044B12Rik; MGC91246
ILMN_2655694	Med9	118.389	109.201	75.5103	76.2809	111.286	62.0699	0.922392	1.01021	1	0.557751	Mus musculus mediator of RNA polymerase II transcription, subunit 9 homolog (yeast) (Med9), mRNA,	BC019367; Med25; FLJ10193; MGC30366
ILMN_2450384	Vegfb	781.075	407.752	771.066	276.75	613.739	342.478	0.52204	0.358919	1	0.558019	Mus musculus vascular endothelial growth factor B (Vegfb), mRNA,	VEGF-B; Vrf
ILMN_2685849	Exosc6	207.863	151.703	508.143	248.294	238.075	132.9	0.729823	0.488629	1	0.558226	Mus musculus exosome component 6 (Exosc6), mRNA,	MGC151362; Mtr3; C76919; 2610510N21Rik
ILMN_1218034	Tmco4	61.0061	31.7886	34.0218	23.6098	40.9905	22.899	0.521073	0.693959	1	0.558642	Mus musculus transmembrane and coiled-coil domains 4 (Tmco4), mRNA,	4632413C14Rik; AI430825
ILMN_2805339	Hspb6	201.789	228.071	330.271	445.856	181.967	101.696	1.13024	1.34997	1	0.558871	Mus musculus heat shock protein, alpha-crystallin-related, B6 (Hspb6), mRNA,	Gm479; AA387366; Hsp20; MGC107687
ILMN_3138743	Acsl3	145.182	165.667	712.045	613.126	307.207	171.93	1.1411	0.861078	1	0.559656	Mus musculus acyl-CoA synthetase long-chain family member 3 (Acsl3), transcript variant 1, mRNA,	PRO2194; 2610510B12Rik; ACS3; Facl3; C85929
ILMN_1214974	Il1rl1l	144.153	116.294	395.088	291.166	194.897	109.08	0.806738	0.736963	1	0.559679
ILMN_2765989	Otub2	56.891	31.077	112.789	52.6347	89.0191	49.8486	0.546255	0.466665	1	0.559976	Mus musculus OTU domain, ubiquitin aldehyde binding 2 (Otub2), mRNA,	OTB2; AI413508; AW557219; 2010015L18Rik; OTU2; 4930586I02Rik
ILMN_2761273	Cenpq	101.692	64.7317	478.465	251.26	233.661	130.86	0.636545	0.525137	1	0.560041	Mus musculus centromere protein Q (Cenpq), mRNA,	2610528M18Rik
ILMN_2721360	Galk1	1984.72	911.817	1811.42	917.072	1618.17	906.303	0.459418	0.506274	1	0.560079	Mus musculus galactokinase 1 (Galk1), mRNA,	Glk1; Glk; GALK; AA409894; Gk
ILMN_3005546	Gle1	87.1531	81.1917	201.131	168.178	98.7508	55.311	0.931598	0.83616	1	0.560107	Mus musculus GLE1 RNA export mediator (yeast) (Gle1), mRNA,	4933405K21Rik; AA553313
ILMN_1224901	Dscc1	27.8082	29.1699	60.0897	41.8566	40.5364	22.7116	1.04897	0.696569	1	0.560276	Mus musculus defective in sister chromatid cohesion 1 homolog (S, cerevisiae) (Dscc1), mRNA,	MGC151212; MGC151210; 2010006I05Rik; Dcc1
ILMN_2713471	Mettl9	141.177	92.0687	339.263	217.813	246.84	138.389	0.652151	0.642017	1	0.560643	Mus musculus methyltransferase like 9 (Mettl9), mRNA,	0610012D09Rik; Drev; AA517660; MNCb-5680
ILMN_2630789	Ankrd6	39.8245	30.6024	73.9213	41.623	83.1944	46.6479	0.768432	0.563071	1	0.560709	Mus musculus ankyrin repeat domain 6 (Ankrd6), transcript variant 2, mRNA,
ILMN_1231651	LOC100045439	59.652	65.2738	161.965	184.738	108.453	60.8372	1.09424	1.1406	1	0.560957	PREDICTED: Mus musculus similar to testis-specific adriamycin sensitivity protein (LOC100045439), mRNA,
ILMN_1218424	Ppp2r2d	354.453	253.784	648.136	354.86	298.199	167.307	0.715987	0.547508	1	0.561057	Mus musculus protein phosphatase 2, regulatory subunit B, delta isoform (Ppp2r2d), mRNA,	MDS026; D7Ertd753e; 1300017E19Rik
ILMN_3000318	Adrbk1	2274.29	1077.23	4123.48	2944.93	3609.5	2025.68	0.473657	0.714185	1	0.561207	Mus musculus adrenergic receptor kinase, beta 1 (Adrbk1), mRNA,	betaARK1; Bark-1; GRK2; Adrbk-1
ILMN_1240466	Eif5	485.831	444.615	1392.23	1065.46	604.944	339.547	0.915163	0.765291	1	0.561287	Mus musculus eukaryotic translation initiation factor 5 (Eif5), transcript variant 2, mRNA,	D12Ertd549e; MGC36509; MGC36374; 2810011H21Rik
ILMN_2639703	LOC100045300	1313.48	966.094	1332.98	1062.15	1140.89	640.391	0.735525	0.796823	1	0.56131	PREDICTED: Mus musculus similar to Dr1 associated protein 1 (negative cofactor 2 alpha) (LOC100045300), mRNA,
ILMN_1256186	Wdr8	55.3065	47.7812	89.5774	80.3309	68.8199	38.6502	0.863935	0.896777	1	0.561614	Mus musculus WD repeat domain 8 (Wdr8), mRNA,	5330425N03Rik; Dd57; 2610044M17Rik
ILMN_2791644	Reep1	74.8136	85.0999	150.65	276.67	119.138	66.9354	1.13749	1.83651	1	0.561833	Mus musculus receptor accessory protein 1 (Reep1), mRNA,	AW558420; D6Ertd253e; C87808
ILMN_2748839	Nup50	60.4026	59.9003	113.749	101.833	83.971	47.1973	0.991683	0.895241	1	0.562067	Mus musculus nucleoporin 50 (Nup50), mRNA,	Npap60; 1700030K07Rik; AI413123
ILMN_2647628	Ppp1cb	129.186	110.028	1146.68	823.174	416.348	234.18	0.851704	0.717878	1	0.562463	Mus musculus protein phosphatase 1, catalytic subunit, beta isoform (Ppp1cb), mRNA,	1200010B19
ILMN_1240857	Cox7a1	64.3218	113.136	35.0367	71.5533	105.165	59.1615	1.75891	2.04224	1	0.562559	Mus musculus cytochrome c oxidase, subunit VIIa 1 (Cox7a1), mRNA,	COX7AH; COX7A; COX7AM
ILMN_2705331	Dus3l	48.681	33.8638	82.0904	61.6602	56.5227	31.8492	0.695628	0.751126	1	0.563475	Mus musculus dihydrouridine synthase 3-like (S, cerevisiae) (Dus3l), mRNA, XM_978180 XM_978219 XM_978263	MGC56820; AI662135; AW557805
ILMN_3082580	Azi2	42.9282	68.1623	80.6457	186.116	55.7167	31.4132	1.58782	2.30783	1	0.563801	Mus musculus 5-azacytidine induced gene 2 (Azi2), transcript variant 2, mRNA,	AZ2; AA410145
ILMN_3043245	Jmjd1a	121.485	200.481	212.892	377.681	238.017	134.234	1.65024	1.77405	1	0.56397	Mus musculus jumonji domain containing 1A (Jmjd1a), transcript variant 1, mRNA, XM_895834 XM_895843 XM_895849 XM_895856 XM_895859 XM_895866 XM_895873 XM_909665 XM_921390 XM_921393 XM_921399 XM_921405 XM_921412 XM_921421 XM_921426 XM_921433 XM_921440 XM_921445 XM_921451	Jmjd1; Tsga; 1700105C21Rik; TGSA; C230043E16Rik; mKIAA0742
ILMN_1252760	Afg3l1	539.942	512.88	607.909	647.513	460.687	259.908	0.94988	1.06515	1	0.564175	Mus musculus AFG3(ATPase family gene 3)-like 1 (yeast) (Afg3l1), mRNA,	1700047G05Rik; 3110061K15Rik
ILMN_1245529	Pcsk4	104.44	49.2902	147.62	49.3676	120.256	67.8598	0.471949	0.334423	1	0.564296	Mus musculus proprotein convertase subtilisin/kexin type 4 (Pcsk4), mRNA,	AI647044; SPC5; L21221; 0710008O07; MGC63195; PC4
ILMN_2783457	2310044H10Rik	993.908	914.455	1672.4	2092.39	862.532	486.858	0.92006	1.25113	1	0.564452	Mus musculus RIKEN cDNA 2310044H10 gene (2310044H10Rik), mRNA,	5430410O10Rik
ILMN_2672798	Psmd5	66.1581	59.1295	335.113	312.288	161.104	90.9678	0.893759	0.931888	1	0.564654	Mus musculus proteasome (prosome, macropain) 26S subunit, non-ATPase, 5 (Psmd5), mRNA,	AW475925; S5b; mKIAA0072; KIAA0072; W91691; 1500032A03Rik
ILMN_2425351	Usp1	221.504	155.013	304.39	132.053	178.306	100.734	0.699818	0.433829	1	0.564952	Mus musculus ubiquitin specific peptdiase 1 (Usp1), mRNA,	MGC25559
ILMN_3130055	Ctdsp1	134.675	89.0547	108.1	72.2652	99.4487	56.1942	0.661258	0.668501	1	0.565057	Mus musculus CTD (carboxy-terminal domain, RNA polymerase II, polypeptide A) small phosphatase 1 (Ctdsp1), mRNA,	NLIIF; Nif3; GIP; SCP1
ILMN_2984793	1500001M20Rik	632.472	345.382	792.715	370.147	410.623	232.221	0.546083	0.466936	1	0.565533	Mus musculus RIKEN cDNA 1500001M20 gene (1500001M20Rik), mRNA,
ILMN_1254840	Smarcb1	410.52	252.339	603.037	450.978	397.963	225.287	0.614682	0.747846	1	0.566101	Mus musculus SWI/SNF related, matrix associated, actin dependent regulator of chromatin, subfamily b, member 1 (Smarcb1), mRNA,	SNF5/INI1; Snf5; AU020204; MGC132387; Ini1; Baf47
ILMN_2973024	1500011H22Rik	661.988	387.027	750.586	656.527	582.053	329.828	0.584644	0.874686	1	0.566663	Mus musculus RIKEN cDNA 1500011H22 gene (1500011H22Rik), mRNA,
ILMN_2946689	Ttc7	105.256	65.428	104.709	66.3579	90.0482	51.0399	0.621609	0.633736	1	0.566807	Mus musculus tetratricopeptide repeat domain 7 (Ttc7), mRNA,	fsn; 1700007L07Rik; hea; 1110035E02Rik
ILMN_2590923	Idi1	50.8703	49.788	278.039	179.522	83.895	47.6242	0.978724	0.645674	1	0.567664	Mus musculus isopentenyl-diphosphate delta isomerase (Idi1), transcript variant 2, mRNA,	MGC118013; 4832416K17Rik; MGC8139
ILMN_2830107	Oxsr1	85.229	73.1206	88.9127	58.033	54.3508	30.857	0.857931	0.652697	1	0.567738	Mus musculus oxidative-stress responsive 1 (Oxsr1), mRNA, XM_993249	Osr1; 2810422B09Rik; AW209236; mKIAA1101; 2210022N24Rik; AI462649
ILMN_2702703	Shmt2	98.3104	59.3409	425.44	203.059	174.704	99.1908	0.603608	0.477292	1	0.567765	Mus musculus serine hydroxymethyltransferase 2 (mitochondrial) (Shmt2), nuclear gene encoding mitochondrial protein, mRNA,	2700043D08Rik; AA408223; AA986903
ILMN_2591127	EG277333	173.013	139.33	456.839	258.217	282.861	160.608	0.805315	0.565225	1	0.567798	Mus musculus predicted gene, EG277333 (EG277333), non-coding RNA,	MGC68323
ILMN_1235902	Nfatc2ip	75.9826	69.7218	172.789	142.046	118.458	67.2621	0.917602	0.822081	1	0.567816	Mus musculus nuclear factor of activated T-cells, cytoplasmic, calcineurin-dependent 2 interacting protein (Nfatc2ip), mRNA,	NIP45; MGC130564; D7Ertd304e
ILMN_1241845	Timm50	660.796	505.612	733.664	492.538	500.216	284.251	0.765156	0.67134	1	0.568257	Mus musculus translocase of inner mitochondrial membrane 50 homolog (yeast) (Timm50), nuclear gene encoding mitochondrial protein, mRNA,	TIM50L; 2810403L02Rik; AU015082
ILMN_1231751	Xpo4	163.484	89.92	503.291	179.746	146.786	83.4284	0.550024	0.357141	1	0.568368	Mus musculus exportin 4 (Xpo4), mRNA,	mKIAA1721; B430309A01Rik
ILMN_2692927	Srd5a1	56.8065	72.9516	86.7447	74.3804	63.3554	36.0186	1.28421	0.857463	1	0.568516
ILMN_2817892	Pold2	1067.66	596.705	1002.82	466.695	944.506	536.972	0.558888	0.465383	1	0.568521	Mus musculus polymerase (DNA directed), delta 2, regulatory subunit (Pold2), mRNA,	po1D2; p50; 50kDa
ILMN_2714579	Stag1	120.337	103.472	313.472	271.769	176.513	100.471	0.859854	0.866963	1	0.569197	Mus musculus stromal antigen 1 (Stag1), mRNA, XM_919981 XM_919990 XM_920002 XM_920014 XM_920028	SA-1; AU045003
ILMN_2701355	Nanos1	48.4674	71.3242	82.5361	122.013	56.0386	31.945	1.47159	1.4783	1	0.570053	Mus musculus nanos homolog 1 (Drosophila) (Nanos1), mRNA,
ILMN_2695228	2810453I06Rik	61.3117	42.4933	56.7355	50.2994	53.9284	30.7588	0.69307	0.886559	1	0.570363	Mus musculus RIKEN cDNA 2810453I06 gene (2810453I06Rik), mRNA,	AW047776; 1500026F15Rik; Sipar
ILMN_2676294	BC048355	136.654	124.795	166.902	194.18	183.44	104.633	0.913223	1.16343	1	0.570394
ILMN_2837189	6720467C03Rik	25.8736	23.4227	26.0648	24.4219	38.0784	21.7212	0.905275	0.936969	1	0.570433	Mus musculus RIKEN cDNA 6720467C03 gene (6720467C03Rik), mRNA,
ILMN_1221039	Exod1	40.6129	34.2487	115.138	81.1409	58.274	33.2419	0.843296	0.704729	1	0.570442	Mus musculus exonuclease domain containing 1 (Exod1), mRNA,	4933424N09Rik; mKIAA1504
ILMN_2600465	Phactr4	285.158	393.631	648.042	840.961	388.747	221.774	1.3804	1.29769	1	0.570485	Mus musculus phosphatase and actin regulator 4 (Phactr4), mRNA,	C330013F19Rik; mKIAA4120; N28169; AW495572; AI527228; FLJ13171; KIAA4120; 3110001B12Rik
ILMN_2666487	Ruvbl1	1427.08	691.847	1832.72	871.893	1126.72	643.149	0.4848	0.475738	1	0.570816	Mus musculus RuvB-like protein 1 (Ruvbl1), mRNA,	Tip49a; 2510009G06Rik; Pontin52
ILMN_1239397	LOC100047934	804.056	633.094	1476.17	729.958	1477.9	843.761	0.787376	0.494494	1	0.570918	PREDICTED: Mus musculus hypothetical protein LOC100047934 (LOC100047934), mRNA,
ILMN_1224736	Zmiz1	261.796	207.816	210.738	76.5886	94.2977	53.8678	0.793809	0.363431	1	0.571252	Mus musculus zinc finger, MIZ-type containing 1 (Zmiz1), mRNA,	E330020C23; BC065120; Rai17
ILMN_1250857	Mre11a	379.853	267.348	877.264	441.097	377.294	215.566	0.703821	0.502811	1	0.571348	Mus musculus meiotic recombination 11 homolog A (S, cerevisiae) (Mre11a), mRNA,	Mre11b; Mre11
ILMN_2768026	Gusb	166.116	63.1015	352.392	161.204	233.804	133.584	0.379865	0.457456	1	0.571349	Mus musculus glucuronidase, beta (Gusb), mRNA,	Gus-r; Gur; Gus-u; Gut; asd; AI747421; Gus-t; Gus; Gus-s; g
ILMN_2718266	Fkbp5	89.0436	83.3217	147.186	97.9228	90.3545	51.6389	0.93574	0.665301	1	0.571515	Mus musculus FK506 binding protein 5 (Fkbp5), mRNA,	Dit1; D17Ertd592e; 51kDa; FKBP51
ILMN_3124226	2010321M09Rik	325.633	326.928	564.123	536.151	308.228	176.255	1.00398	0.950415	1	0.571834	Mus musculus RIKEN cDNA 2010321M09 gene (2010321M09Rik), transcript variant 2, mRNA,
ILMN_1235500	Nup62	1062.08	677.436	2706.85	1475.36	1191.53	681.76	0.637838	0.545048	1	0.572172	Mus musculus nucleoporin 62 (Nup62), mRNA,	Nupc1; D7Ertd649e; MGC101995; AU045898; p62; AA589433; AI790512; AI426861
ILMN_1226323	Cul1	257.622	225.502	761.258	645.841	305.665	174.985	0.87532	0.848387	1	0.572472	Mus musculus cullin 1 (Cul1), mRNA,
ILMN_2911760	Ubac1	306.779	308.168	536.94	556.833	296.205	169.625	1.00453	1.03705	1	0.57266	Mus musculus ubiquitin associated domain containing 1 (Ubac1), mRNA,	Ubadc1; GBDR1; AA407978; Gdbr1; 1110033G07Rik
ILMN_2988572	Ezh2	50.5534	44.9706	72.3581	49.236	58.5948	33.5887	0.889565	0.680449	1	0.573237	Mus musculus enhancer of zeste homolog 2 (Drosophila) (Ezh2), mRNA,	Enx-1; MGC90723; mKIAA4065; KIAA4065; Enx1h
ILMN_1224658	Spast	142.167	106.311	395.165	169.888	135.07	77.4753	0.747785	0.429918	1	0.573592	Mus musculus spastin (Spast), mRNA,	mKIAA1083; Spg4
ILMN_2702061	Tubb2c	4016.73	4211.53	4743.17	4067.82	2803.65	1608.81	1.0485	0.857618	1	0.573827	Mus musculus tubulin, beta 2c (Tubb2c), mRNA,	4930542G03Rik; MGC6713; MGC28623; RP23-132N23,7; MGC101937
ILMN_2668462	Emilin1	44.1656	34.295	85.3254	58.6344	56.6726	32.5284	0.776508	0.687186	1	0.573971
ILMN_1212993	Smpd4	100.367	74.5347	227.742	92.9554	83.852	48.1713	0.742621	0.408161	1	0.574479	Mus musculus sphingomyelin phosphodiesterase 4 (Smpd4), mRNA,	4122402O22Rik; mKIAA1418
ILMN_3160212	AU021838	318.58	234.728	687.728	566.467	408.411	234.628	0.736797	0.823679	1	0.574489	Mus musculus expressed sequence AU021838 (AU021838), mRNA,	AW536152; Prps1; MGC117905; 6720461H18
ILMN_2956102	Ncapd2	683.555	602.92	627.071	475.45	726.924	417.684	0.882036	0.758207	1	0.574592	Mus musculus non-SMC condensin I complex, subunit D2 (Ncapd2), mRNA,	MGC39046; mKIAA0159; CAP-D2; 2810406C15Rik; CNAP1
ILMN_2931384	Lrrc59	169.583	94.344	283.141	100.973	136.876	78.6516	0.55633	0.356618	1	0.57462	Mus musculus leucine rich repeat containing 59 (Lrrc59), mRNA,	AA959742; C78668; RP23-290B5,2
ILMN_2630974	Chek1	27.9122	23.1916	44.0112	30.848	37.6637	21.6594	0.830876	0.700911	1	0.575075	Mus musculus checkpoint kinase 1 homolog (S, pombe) (Chek1), mRNA,	rad27; Chk1; C85740
ILMN_2786070	Gtf3c5	245.346	217.207	375.292	293.1	216.09	124.453	0.885311	0.780991	1	0.57593	Mus musculus general transcription factor IIIC, polypeptide 5 (Gtf3c5), mRNA,	2700084A09Rik; TFIIIC63; TFiiiC2-63
ILMN_2743494	Polr2d	140.109	99.8229	285.42	247.182	226.239	130.356	0.712467	0.866029	1	0.576184	Mus musculus polymerase (RNA) II (DNA directed) polypeptide D (Polr2d), transcript variant 1, mRNA,	2310002G05Rik; RBP4; HSRBP4; 2610028L19Rik
ILMN_2674060	Iws1	37.7972	33.8331	81.7649	58.9991	44.5264	25.6599	0.895122	0.72157	1	0.576284	Mus musculus IWS1 homolog (S, cerevisiae) (Iws1), mRNA,	1700069O15Rik; 3000008H23
ILMN_2692110	Tfdp1	1237.06	703.916	2483.15	1229.97	1965.19	1132.94	0.569022	0.495326	1	0.576506
ILMN_2880536	Uck2	2227.13	1617.02	4892.38	2961.82	2339.91	1349.61	0.726053	0.605395	1	0.576776	Mus musculus uridine-cytidine kinase 2 (Uck2), mRNA,	UK; AI481316; AU020720; UMK; TSA903; Umpk; AU018180; AA407809
ILMN_2938390	Ipmk	115.208	58.9093	217.284	104.126	166.27	95.9075	0.51133	0.479217	1	0.576818	Mus musculus inositol polyphosphate multikinase (Ipmk), mRNA,	2410017C19Rik; Impk; AA408208
ILMN_1247257	Gpd2	471.754	357.477	800.185	409.27	343.789	198.314	0.757761	0.51147	1	0.576847	Mus musculus glycerol phosphate dehydrogenase 2, mitochondrial (Gpd2), nuclear gene encoding mitochondrial protein, mRNA,	AW494132; AA408484; TISP38; GPDH; Gpd-m; Gdm1; Gpdh-m; AI448216; AU021455
ILMN_2852533	Ahcy	90.8903	103.948	203.621	118.492	117.706	67.9173	1.14367	0.581925	1	0.577008	Mus musculus S-adenosylhomocysteine hydrolase (Ahcy), mRNA,	AL024110; MGC118063; SAHH; CuBP; AA987153
ILMN_1256301	Rcc2	116.474	59.5272	110.741	61.1491	82.9531	47.8694	0.511078	0.552181	1	0.577066	Mus musculus regulator of chromosome condensation 2 (Rcc2), mRNA,	AA675016; Td60; AA536646; 2610529N02Rik; 2610510H01Rik; mKIAA1470
ILMN_2828687	Mars	276.925	139.317	314.799	143.001	225.812	130.319	0.503086	0.45426	1	0.577112	Mus musculus methionine-tRNA synthetase (Mars), mRNA,	MTRNS; MetRS; MGC90747
ILMN_2747885	Ndufb11	45.3928	56.868	66.8627	85.1915	64.1817	37.0589	1.2528	1.27413	1	0.577405	Mus musculus NADH dehydrogenase (ubiquinone) 1 beta subcomplex, 11 (Ndufb11), mRNA,	D5Bwg0566e; NP15,6; D5Bwg0577e; Np15
ILMN_2608394	Ppp2r5d	58.2517	51.1074	54.6747	56.0438	53.6377	31.0008	0.877355	1.02504	1	0.577966	Mus musculus protein phosphatase 2, regulatory subunit B (B56), delta isoform (Ppp2r5d), mRNA,	TEG-271; Tex271
ILMN_2732757	9830002I17Rik	141.661	28.3508	88.1056	60.94	153.747	88.9198	0.200131	0.691671	1	0.578352
ILMN_1218425	Taf5	34.8331	37.2573	94.3879	90.7325	57.1668	33.0701	1.06959	0.961273	1	0.578484	Mus musculus TAF5 RNA polymerase II, TATA box binding protein (TBP)-associated factor (Taf5), mRNA,	6330528C20Rik; AV117817
ILMN_2744414	Nme3	188.667	139.895	144.094	125.502	153.813	89.0401	0.741489	0.870973	1	0.578884	Mus musculus non-metastatic cells 3, protein expressed in (Nme3), mRNA,	Ndk3; AI413736; Nm23-M3; 1810009F08Rik; Nm23-DR; DR-nm23
ILMN_2681814	Usp46	36.3177	28.5346	71.6061	50.17	42.7887	24.7769	0.785694	0.700638	1	0.579052	Mus musculus ubiquitin specific peptidase 46 (Usp46), mRNA,	1190009E20Rik; 2410018I08Rik; AI451644
ILMN_1227225	Trim28	2425.39	2818.02	2122.93	1618.65	1658.03	960.208	1.16188	0.762464	1	0.579126	Mus musculus tripartite motif protein 28 (Trim28), mRNA,	AA408787; KRIP-1; Tif1beta; KAP-1; Tif1b; MGC102100
ILMN_2604643	Tbl2	257.315	214.575	430.207	242.12	311.378	180.622	0.833902	0.562798	1	0.580074
ILMN_2659052	Ccnb1	356.294	225.396	1515.62	909.401	521.727	302.655	0.632614	0.600018	1	0.580103	Mus musculus cyclin B1 (Ccnb1), mRNA,	MGC90915; Ccnb1-rs13; MGC18763; Cycb-4
ILMN_1221048	Psat1	1590.78	974.807	3108.42	1645.17	1859.56	1078.86	0.612787	0.529265	1	0.580167	Mus musculus phosphoserine aminotransferase 1 (Psat1), mRNA,	AL024083; PSA; D8Ertd814e; EPIP; Psat; AL024078; AU040266
ILMN_3064941	Ptbp1	42.3759	41.5415	78.215	59.7765	65.6929	38.115	0.980308	0.764259	1	0.580199	Mus musculus polypyrimidine tract binding protein 1 (Ptbp1), transcript variant 1, mRNA,	AA407203; PTB3; PTB-1; HNRPI; PTB2; AL033359; Ptb; PTB4; pPTB
ILMN_3094608	Rdbp	347.081	214.392	434.417	203.442	227.277	131.89	0.617701	0.468311	1	0.580305	Mus musculus RD RNA-binding protein (Rdbp), transcript variant 2, mRNA,	D17H6S45; NELF-E; RD
ILMN_2705673	Spg21	305.342	290.021	428.142	523.061	642.873	373.162	0.949823	1.2217	1	0.58046	Mus musculus spastic paraplegia 21 homolog (human) (Spg21), mRNA,	ACP33; MAST; D9Wsu18e; BM-019; GL010; C78576
ILMN_2948272	Spc24	176.026	124.619	355.547	229.622	152.947	88.8225	0.707959	0.645827	1	0.58074	Mus musculus SPC24, NDC80 kinetochore complex component, homolog (S, cerevisiae) (Spc24), mRNA,	2410030K01Rik; Spbc24; AV109292
ILMN_2821850	Nampt	87.9899	76.1761	460.45	309.984	159.664	92.7302	0.865737	0.67322	1	0.580784	Mus musculus nicotinamide phosphoribosyltransferase (Nampt), mRNA,	Visfatin; Pbef; AI314458; 1110035O14Rik; Nampt
ILMN_1214110	Rnf8	43.7203	43.7128	110.329	120.843	68.2335	39.6362	0.99983	1.0953	1	0.58089	Mus musculus ring finger protein 8 (Rnf8), mRNA,	AIP37; 3830404E21Rik
ILMN_1244061	Nup50	72.9726	65.4328	119.476	101.347	86.3118	50.1513	0.896677	0.84826	1	0.581048	Mus musculus nucleoporin 50 (Nup50), mRNA,	Npap60; 1700030K07Rik; AI413123
ILMN_2809202	Cdca4	233.416	179.768	411.5	209.425	347.884	202.147	0.770161	0.508931	1	0.581074	Mus musculus cell division cycle associated 4 (Cdca4), mRNA,	SEI-3; 2410018C03Rik; HEPP
ILMN_2659108	Ppp4r1	97.6479	85.2709	172.629	101.73	140.656	81.7426	0.873249	0.589295	1	0.581152	Mus musculus protein phosphatase 4, regulatory subunit 1 (Ppp4r1), mRNA,	3110001J10Rik; Pp4r1; MGC31567
ILMN_1223145	Rqcd1	179.56	102.598	339.58	171.819	169.14	98.3147	0.571386	0.505976	1	0.581261	Mus musculus rcd1 (required for cell differentiation) homolog 1 (S, pombe) (Rqcd1), mRNA,	Fl10; AI593551; 2610007F23Rik
ILMN_3059059	Gnb1l	37.9816	29.249	85.5761	41.4119	52.7415	30.6647	0.770085	0.483919	1	0.581415	Mus musculus guanine nucleotide binding protein (G protein), beta polypeptide 1-like (Gnb1l), transcript variant 2, mRNA,	ESTM55; Wdr14; Wdvcf
ILMN_2471045	Wdr4	66.9135	41.8682	164.302	78.6648	79.2132	46.0636	0.625706	0.478781	1	0.581514	Mus musculus WD repeat domain 4 (Wdr4), mRNA,	D530049K22Rik; AI415180; AI448349
ILMN_1254380	Dbr1	475.526	353.089	1208.59	632.909	451.863	262.879	0.742523	0.523677	1	0.581768	Mus musculus debranching enzyme homolog 1 (S, cerevisiae) (Dbr1), mRNA,	AW018415
ILMN_1216046	C230052I12Rik	215.103	84.3528	237.329	66.047	159.901	93.0357	0.392151	0.278294	1	0.581834	Mus musculus RIKEN cDNA C230052I12 gene (C230052I12Rik), mRNA,	AW538696; AW124591
ILMN_2734712	Ptpla	263.151	123.305	425.804	231.16	287.343	167.214	0.468572	0.542878	1	0.581932	Mus musculus protein tyrosine phosphatase-like (proline instead of catalytic arginine), member a (Ptpla), transcript variant 2, mRNA,
ILMN_1233304	9130011E15Rik	83.824	86.6081	133.177	166.472	83.013	48.3134	1.03321	1.25	1	0.581998	Mus musculus RIKEN cDNA 9130011E15 gene (9130011E15Rik), mRNA,	AI431055; AW050122
ILMN_2673599	Actn4	364.228	393.788	264.664	278.505	267.267	155.576	1.08116	1.0523	1	0.582102	Mus musculus actinin alpha 4 (Actn4), mRNA,	C77391; MGC102374
ILMN_3096933	Top1mt	595.241	237.668	574.907	245.964	606.555	353.173	0.399281	0.427832	1	0.582261	Mus musculus DNA topoisomerase 1, mitochondrial (Top1mt), mRNA,	2900052H09Rik
ILMN_2744439	Hdgf	624.681	355.833	322.781	168.832	617.729	359.694	0.569624	0.523053	1	0.582284	Mus musculus hepatoma-derived growth factor (Hdgf), mRNA,	AI118077; D3Ertd299e
ILMN_1213725	Nudt5	1234.49	659.922	2318.9	1103.96	1175.95	684.775	0.53457	0.476072	1	0.582315	Mus musculus nudix (nucleoside diphosphate linked moiety X)-type motif 5 (Nudt5), mRNA,
ILMN_2734152	E2f6	54.7828	44.9065	98.8153	64.8393	75.0268	43.6991	0.819719	0.656167	1	0.582447	Mus musculus E2F transcription factor 6 (E2f6), mRNA,	AI462434; E2F6b; EMA
ILMN_2435505	Usf1	36.613	34.5213	131.844	129.853	56.5099	32.9443	0.942868	0.984897	1	0.582982	Mus musculus upstream transcription factor 1 (Usf1), mRNA,
ILMN_1220187	Ppp1cc	40.9324	27.3479	125.781	76.36	74.4462	43.4009	0.668124	0.607085	1	0.582983	Mus musculus protein phosphatase 1, catalytic subunit, gamma isoform (Ppp1cc), mRNA,	PP1; dis2m1
ILMN_2727920	Tspo	414.519	254.376	543.076	543.537	723.005	421.549	0.613666	1.00085	1	0.583051	Mus musculus translocator protein (Tspo), mRNA,	IBP; PBR; Bzrp
ILMN_2632971	B3galt4	50.1807	64.519	62.1838	80.8428	42.0218	24.5082	1.28573	1.30006	1	0.583226	Mus musculus UDP-Gal:betaGalNAc beta 1,3-galactosyltransferase, polypeptide 4 (B3galt4), mRNA,	Gal-T2
ILMN_1235697	N6amt2	569.681	419.176	645.763	819.864	526.532	307.094	0.735808	1.26961	1	0.583238	Mus musculus N-6 adenine-specific DNA methyltransferase 2 (putative) (N6amt2), mRNA,	Ayu21-96; Gt(pU21)96Imeg; 2510005D08Rik; AW045965; GtAyu21-96
ILMN_2424399	Ube2s	78.9163	66.4653	85.9636	71.1467	85.5995	49.9333	0.842225	0.827638	1	0.583337
ILMN_2943849	Zbtb45	79.3827	50.4842	77.499	57.1518	77.291	45.0883	0.635959	0.737453	1	0.583358	Mus musculus zinc finger and BTB domain containing 45 (Zbtb45), mRNA,	Gm157; Zfp499; MGC106784
ILMN_3062470	Crls1	75.8831	50.6739	187.366	139.461	116.733	68.1372	0.667789	0.744322	1	0.583702	Mus musculus cardiolipin synthase 1 (Crls1), transcript variant 1, mRNA,	0610009I22Rik; 4930557M15Rik; 5730490M08Rik; RP23-77H16,4
ILMN_1230263	Me2	183.082	119.301	279.189	143.361	185.666	108.473	0.651624	0.513492	1	0.584238	Mus musculus malic enzyme 2, NAD(+)-dependent, mitochondrial (Me2), nuclear gene encoding mitochondrial protein, mRNA,	D030040L20Rik; NAD-ME; AW120568
ILMN_2715234	Rnmtl1	206.353	166.567	255.23	155.467	171.108	99.9758	0.807197	0.609126	1	0.584284	Mus musculus RNA methyltransferase like 1 (Rnmtl1), mRNA,	RP23-147P4,7; 4833420N02Rik; AI255153; HC90
ILMN_2757445	Ccdc41	375.399	334.716	873.899	526.68	423.145	247.373	0.891627	0.602678	1	0.584607	Mus musculus coiled-coil domain containing 41 (Ccdc41), mRNA,	5730513H21Rik; 4921537D05Rik; 2600001G24Rik
ILMN_2606180	Acot7	416.646	268.244	484.189	266.942	362.954	212.344	0.643819	0.551317	1	0.585044	Mus musculus acyl-CoA thioesterase 7 (Acot7), mRNA,	LACH1; AU015130; AU042212; Bach; ACH1; 2410041A17Rik; ACT; CTE-II; AW557066
ILMN_2971845	Dtymk	638.774	381.023	682.84	534.386	737.019	431.248	0.596492	0.782593	1	0.585124	Mus musculus deoxythymidylate kinase (Dtymk), mRNA,	TYPK; D10Ertd203e; mtmk; CDC8; Tmk; TMPK; AU044245
ILMN_2867899	Cdc20	1817.63	1512.68	2804.48	2377.13	1892.52	1107.98	0.832229	0.847619	1	0.585452	Mus musculus cell division cycle 20 homolog (S, cerevisiae) (Cdc20), mRNA,	C87100; p55CDC; 2310042N09Rik
ILMN_2590908	Abcb8	131.296	147.092	123.291	134.483	106.237	62.2207	1.1203	1.09078	1	0.585676	Mus musculus ATP-binding cassette, sub-family B (MDR/TAP), member 8 (Abcb8), nuclear gene encoding mitochondrial protein, mRNA,	AA409895; 4833412N02Rik
ILMN_3133352	Ung	669.013	339.285	1199.99	387.612	693.924	406.482	0.507143	0.323013	1	0.585773	Mus musculus uracil DNA glycosylase (Ung), transcript variant 2, mRNA,	UNG1; UNG2
ILMN_2658054	Dhrs4	91.5829	86.0996	178.792	286.837	138.316	81.0324	0.940128	1.60431	1	0.585849	Mus musculus dehydrogenase/reductase (SDR family) member 4 (Dhrs4), transcript variant 1, mRNA,	RRD; mouNRDR; AI043103; AI790593; D14Ucla2
ILMN_2629971	Fzr1	153.932	143.171	156.422	149.856	146.814	86.014	0.930095	0.958028	1	0.585872	Mus musculus fizzy/cell division cycle 20 related 1 (Drosophila) (Fzr1), mRNA,	Cdh1; HCDH; FZR; FZR2; Fyr; HCDH1; AW108046
ILMN_2749382	Tarsl2	46.9255	67.6274	87.1438	127.655	74.4756	43.6348	1.44117	1.46488	1	0.585894	Mus musculus threonyl-tRNA synthetase-like 2 (Tarsl2), mRNA,	MGC31414; A530046H20Rik
ILMN_2716336	Ap1g2	44.004	40.048	94.6291	64.4706	58.7571	34.461	0.910099	0.681298	1	0.5865	Mus musculus adaptor protein complex AP-1, gamma 2 subunit (Ap1g2), mRNA,	Adtg2; G2ad; MGC118107
ILMN_2662316	5830482F20Rik	70.3918	71.7609	143.94	92.1447	89.4596	52.4688	1.01945	0.640158	1	0.586508	Mus musculus RIKEN cDNA 5830482F20 gene (5830482F20Rik), mRNA,	9930116N10Rik; MGC51433
ILMN_1227366	Dera	67.6012	53.5459	165.471	149.199	92.0185	54.011	0.792086	0.901664	1	0.586958	Mus musculus 2-deoxyribose-5-phosphate aldolase homolog (C, elegans) (Dera), mRNA,	DEOC; 2500002K03Rik; 2010002D22Rik
ILMN_2710380	Gabpb2	112.774	102.743	57.9463	49.7426	51.6832	30.336	0.911052	0.858427	1	0.586959	Mus musculus GA repeat binding protein, beta 2 (Gabpb2), transcript variant 1, mRNA,	A430024B14Rik; AV050852; 1810015F01Rik; 9430006E19Rik; Gabpb2-1; 5830427M07
ILMN_3022895	2410127L17Rik	36.6535	32.4953	78.8092	62.7479	53.1996	31.2534	0.886553	0.796201	1	0.587474	Mus musculus RIKEN cDNA 2410127L17 gene (2410127L17Rik), mRNA,
ILMN_1240445	Stard4	564.822	502.011	996.277	667.884	948.05	557.075	0.888794	0.67038	1	0.587601	Mus musculus StAR-related lipid transfer (START) domain containing 4 (Stard4), mRNA,	9030213J02Rik; AW324468; 4632419C16Rik; AA517649
ILMN_2606436	Diap3	142.565	124.683	229.721	203.723	111.265	65.4346	0.874565	0.886828	1	0.588098	Mus musculus diaphanous homolog 3 (Drosophila) (Diap3), mRNA,	mKIAA4117; mDia2; 4930417P13Rik; p134MDia2; Dia2; KIAA4117
ILMN_2640140	Bola1	325.837	251.192	186.06	154.778	303.206	178.325	0.770913	0.831872	1	0.588131	Mus musculus bolA-like 1 (E, coli) (Bola1), mRNA,	1810037G04Rik
ILMN_2675740	2017-03-03	353.243	313.652	652.423	381.28	364.702	214.652	0.887921	0.584406	1	0.588568	Mus musculus methionine-tRNA synthetase 2 (mitochondrial) (Mars2), nuclear gene encoding mitochondrial protein, mRNA,	C730026E21Rik; MetRS
ILMN_2970623	Cenpp	248.587	236.016	477.749	320.154	295.239	173.897	0.949428	0.67013	1	0.589005	Mus musculus centromere protein P (Cenpp), mRNA,	4921518G09Rik; 1700022C02Rik
ILMN_2614966	Rab27a	124.199	77.7247	145.873	132.033	148.22	87.322	0.625806	0.905121	1	0.589138	Mus musculus RAB27A, member RAS oncogene family (Rab27a), mRNA,	2410003M20Rik; 2210402C08Rik; ash; 4933437C11Rik
ILMN_2659351	Odf2	53.5784	63.1313	68.7258	79.8526	51.6909	30.4621	1.1783	1.1619	1	0.589312	Mus musculus outer dense fiber of sperm tails 2 (Odf2), mRNA,	MMTEST29; AI848335
ILMN_1212997	Xkr5	46.5184	43.1137	50.1827	42.3361	46.6084	27.4863	0.926811	0.843638	1	0.589728	Mus musculus X Kell blood group precursor-related family, member 5 (Xkr5), mRNA,	XRG5; 5430438H03Rik
ILMN_2760671	D030056L22Rik	744.556	621.209	1629.39	991.027	1012.39	597.495	0.834335	0.608221	1	0.590182	Mus musculus RIKEN cDNA D030056L22 gene (D030056L22Rik), mRNA,
ILMN_1243499	Ide	795.711	575.487	870.407	478.778	479.107	282.776	0.723237	0.550062	1	0.590216	Mus musculus insulin degrading enzyme (Ide), mRNA,	1300012G03Rik; AA675336; AI507533; 4833415K22Rik
ILMN_2508519	Vars	134.702	83.6715	64.6281	45.1673	120.997	71.4299	0.621159	0.698881	1	0.590344	Mus musculus valyl-tRNA synthetase (Vars), nuclear gene encoding mitochondrial protein, mRNA,	Bat6; G7a; D17H6S56E; Vars2; Bat-6
ILMN_2665422	Afg3l1	492.967	480.126	597.183	563.638	423.193	249.84	0.973952	0.943828	1	0.59037
ILMN_1377924	Gapdh	4566.32	3784.76	4605.74	3014.37	4266.12	2519.64	0.828842	0.654481	1	0.590615	Mus musculus glyceraldehyde-3-phosphate dehydrogenase (Gapdh), mRNA,	MGC103190; MGC102544; MGC103191; MGC102546; Gapd
ILMN_1218205	Taf5	127.203	123.348	302.778	233.547	153.881	90.8894	0.969698	0.771347	1	0.590649	Mus musculus TAF5 RNA polymerase II, TATA box binding protein (TBP)-associated factor (Taf5), mRNA,	6330528C20Rik; AV117817
ILMN_2676716	2500003M10Rik	102.045	85.922	180.984	240.12	116.317	68.7067	0.841998	1.32675	1	0.590684	Mus musculus RIKEN cDNA 2500003M10 gene (2500003M10Rik), mRNA,	C81330
ILMN_2763772	Rpap3	123.145	88.7729	171.361	128.394	145.261	85.8153	0.720882	0.749262	1	0.590768	Mus musculus RNA polymerase II associated protein 3 (Rpap3), mRNA,	2310042P20Rik; D15Ertd682e
ILMN_2957589	Toe1	241.512	223.003	410.29	306.061	249.211	147.273	0.923363	0.745964	1	0.590957	Mus musculus target of EGR1, member 1 (nuclear) (Toe1), mRNA,	AI413517; 4930584N22Rik; 4933424D16Rik
ILMN_2739965	Csnk1d	595.941	465.507	1376.98	969.641	743.386	439.333	0.78113	0.704178	1	0.590988	Mus musculus casein kinase 1, delta (Csnk1d), transcript variant 2, mRNA,	D930010H05Rik; 1200006A05Rik; AA409348
ILMN_1237672	Rad51	27.0747	26.1838	74.4268	38.7021	34.4251	20.3544	0.967097	0.520002	1	0.591267	Mus musculus RAD51 homolog (S, cerevisiae) (Rad51), mRNA,	Rad51a; Reca; AV304093
ILMN_2612143	Sin3a	407.254	433.271	590.693	681.337	537.818	318.05	1.06388	1.15345	1	0.59137	Mus musculus transcriptional regulator, SIN3A (yeast) (Sin3a), mRNA,	KIAA4126; Sin3; mSin3A; AW553200; mKIAA4126
ILMN_2617071	Nsl1	35.9697	33.4043	60.0438	34.4633	37.0833	21.9368	0.92868	0.57397	1	0.591553	Mus musculus NSL1, MIND kinetochore complex component, homolog (S, cerevisiae) (Nsl1), mRNA,	AI451597; Gm105; 4833432M17Rik; Gm984
ILMN_1222123	Camk2d	105.025	85.1362	235.495	138.179	114.869	67.968	0.810628	0.586761	1	0.591702	Mus musculus calcium/calmodulin-dependent protein kinase II, delta (Camk2d), transcript variant 2, mRNA,	8030469K03Rik; 2810011D23Rik; MGC60852; mKIAA4163; KIAA4163; [d]-CaMKII
ILMN_2599667	Ap4m1	63.924	66.0928	73.1299	66.644	62.7646	37.1478	1.03393	0.91131	1	0.59186	Mus musculus adaptor-related protein complex AP-4, mu 1 (Ap4m1), mRNA,	Ap4m4; 4930443L05Rik
ILMN_3151722	Net1	79.7765	68.3008	248.715	157.642	148.614	88.0413	0.856152	0.633826	1	0.592414	Mus musculus neuroepithelial cell transforming gene 1 (Net1), transcript variant 1, mRNA,	AU015857; 0610025H04Rik; mNET1; 9530071N24Rik; AI604373; Net1a
ILMN_2669982	1700025G04Rik	58.253	43.0851	179.468	96.8339	49.8187	29.5218	0.73962	0.539561	1	0.592585	Mus musculus RIKEN cDNA 1700025G04 gene (1700025G04Rik), mRNA,	2900042O04Rik; AV212693
ILMN_2647273	Gtf3c5	50.6829	49.8971	54.9178	44.8418	53.5332	31.7232	0.984495	0.816525	1	0.592589	Mus musculus general transcription factor IIIC, polypeptide 5 (Gtf3c5), mRNA,	2700084A09Rik; TFIIIC63; TFiiiC2-63
ILMN_2883147	Mrpl12	2903.44	1537.22	3082.21	1737.36	2266.7	1344.38	0.529449	0.563675	1	0.593099	Mus musculus mitochondrial ribosomal protein L12 (Mrpl12), nuclear gene encoding mitochondrial protein, mRNA,	0610034O11Rik; Rpml12; 1500031N16Rik; MRP-L12
ILMN_1232120	2310033P09Rik	349.955	471.282	215.474	279.021	251.99	149.459	1.34669	1.29491	1	0.593116	Mus musculus RIKEN cDNA 2310033P09 gene (2310033P09Rik), mRNA,	RP23-192P17,3; MGC7354
ILMN_3163529	LOC100045522	40.9401	55.2316	59.8425	77.929	47.5577	28.2104	1.34908	1.30223	1	0.593183	PREDICTED: Mus musculus similar to SMAD specific E3 ubiquitin protein ligase 2 (LOC100045522), mRNA,
ILMN_1225923	S100pbp	51.1669	56.6409	62.786	74.1827	48.5187	28.7918	1.10698	1.18152	1	0.593416	Mus musculus S100P binding protein (S100pbp), mRNA,	4930429A08Rik; S100pbpr; AI851343
ILMN_2787396	Mrps22	681.163	420.929	975.228	691.423	673.725	399.971	0.617957	0.708986	1	0.593672	Mus musculus mitochondrial ribosomal protein S22 (Mrps22), mRNA,	Rpms22; 3100002P07Rik
ILMN_1259712	Zfp236	137.655	81.1457	321.577	263.872	170.173	101.029	0.589488	0.820556	1	0.593684	PREDICTED: Mus musculus zinc finger protein 236, transcript variant 1 (Zfp236), mRNA,
ILMN_2730797	Slc25a10	163.591	140.387	166.634	106.008	105.53	62.705	0.858155	0.636173	1	0.594194	Mus musculus solute carrier family 25 (mitochondrial carrier, dicarboxylate transporter), member 10 (Slc25a10), nuclear gene encoding mitochondrial protein, mRNA,	Dic
ILMN_2974611	Tapbpl	54.0834	34.8171	59.9722	51.3873	60.5848	36.0027	0.643767	0.856853	1	0.594253	Mus musculus TAP binding protein-like (Tapbpl), mRNA,	BC017613; TAPBPL-R; MGC27679
ILMN_2629776	Pcsk4	101.565	47.679	149.142	43.8691	108.977	64.766	0.469442	0.294143	1	0.594307	Mus musculus proprotein convertase subtilisin/kexin type 4 (Pcsk4), mRNA,	AI647044; SPC5; L21221; 0710008O07; MGC63195; PC4
ILMN_1217225	Ccdc91	57.2498	55.314	98.7739	145.048	72.1308	42.8729	0.966187	1.46848	1	0.594377	Mus musculus coiled-coil domain containing 91 (Ccdc91), mRNA,	1700086G08Rik; AW555238; AU045683; 1810060J02Rik
ILMN_2855123	Ucp2	39.3131	47.4791	31.869	27.1804	36.3895	21.6308	1.20772	0.852879	1	0.594426	Mus musculus uncoupling protein 2 (mitochondrial, proton carrier) (Ucp2), mRNA,	Slc25a8
ILMN_3044195	Camk2d	43.9137	35.8048	89.8559	67.3792	45.1206	26.8211	0.815344	0.749858	1	0.594431	Mus musculus calcium/calmodulin-dependent protein kinase II, delta (Camk2d), transcript variant 2, mRNA,	8030469K03Rik; 2810011D23Rik; MGC60852; mKIAA4163; KIAA4163; [d]-CaMKII
ILMN_2776230	Sumo3	299.988	266.299	669.754	572.372	421.494	250.596	0.8877	0.854601	1	0.594542
ILMN_2640570	Pak4	110.831	114.007	208.758	243.852	135.538	80.5965	1.02866	1.16811	1	0.594643	Mus musculus p21 (CDKN1A)-activated kinase 4 (Pak4), mRNA,	mKIAA1142; AW555722; 5730488L07Rik
ILMN_2620304	Arl2	189.834	100.057	136.209	70.7262	166.141	98.9027	0.527078	0.519247	1	0.595294	Mus musculus ADP-ribosylation factor-like 2 (Arl2), mRNA,	AW553335; 2610009M23Rik; AI115441
ILMN_2639036	Hspd1	336.299	197.843	3256.86	1730.85	1319.73	785.86	0.588293	0.531448	1	0.595471	Mus musculus heat shock protein 1 (chaperonin) (Hspd1), mRNA,	Hsp60; 60kDa
ILMN_2852380	Srp54	58.6982	55.9673	277.694	413.245	144.308	85.9782	0.953476	1.48813	1	0.595799	Mus musculus signal recognition particle 54 (Srp54), mRNA,	54kDa
ILMN_2706129	E130303B06Rik	77.2004	49.6255	116.474	45.3238	85.8997	51.193	0.642814	0.389134	1	0.595962	Mus musculus RIKEN cDNA E130303B06 gene (E130303B06Rik), mRNA,	AI606951
ILMN_2876560	Ino80e	220.252	91.5286	149.014	53.2748	118.793	70.8216	0.415564	0.357515	1	0.596178	Mus musculus NO80 complex subunit E (Ino80e), mRNA,	Ccdc85; AI225782; MGC31515; AI854876
ILMN_2498787	Zfp236	106.631	74.6274	270.627	208.378	130.421	77.7627	0.699869	0.769981	1	0.596246	PREDICTED: Mus musculus zinc finger protein 236, transcript variant 1 (Zfp236), mRNA,
ILMN_2658208	Setd8	332.418	262.65	384.893	179.237	256.412	152.885	0.790119	0.465681	1	0.596249	Mus musculus SET domain containing (lysine methyltransferase) 8 (Setd8), mRNA,	AW536475; 2410195B05Rik; AA617402; MGC117832
ILMN_2718600	Nfyb	388.946	360.835	431.025	393.451	346.128	206.442	0.927725	0.912826	1	0.596431	Mus musculus nuclear transcription factor-Y beta (Nfyb), mRNA,	Cbf-A; AA985999
ILMN_3028981	Map2k7	86.5891	107.992	52.9967	57.3404	88.4899	52.7886	1.24718	1.08196	1	0.59655	Mus musculus mitogen-activated protein kinase kinase 7 (Map2k7), transcript variant 1, mRNA,	MKK7; 5930412N11Rik; Jnkk2; Prkmk7; sek2
ILMN_2856697	Calm2	395.534	294.748	1524.41	1657.24	701.85	418.725	0.745191	1.08714	1	0.596602	Mus musculus calmodulin 2 (Calm2), mRNA,	AL024017; 1500001E21Rik
ILMN_1238436	Cplx2	70.3861	70.1145	43.5371	144.484	96.0858	57.3437	0.996141	3.31863	1	0.596797	Mus musculus complexin 2 (Cplx2), mRNA,	AI413745; 921-L; AW492120
ILMN_2709901	Nup54	37.2365	36.136	98.3087	65.8589	60.3042	36.0094	0.970445	0.669919	1	0.59713	Mus musculus nucleoporin 54 (Nup54), mRNA,	54kDa; 3110079L04Rik
ILMN_2421299	Zfp191	51.4703	58.2346	112.706	115.834	57.2396	34.1825	1.13142	1.02775	1	0.597182	Mus musculus zinc finger protein 191 (Zfp191), mRNA,	KOX17; Znf191; AI480505; AL024422; Znp191; 3526401F17Rik; 5033419P20Rik; ZF-12; AI642085
ILMN_2960822	BC085271	1851.45	1062.58	4930.18	2070.48	2029.29	1212.02	0.573919	0.419959	1	0.597262	Mus musculus cDNA sequence BC085271 (BC085271), mRNA,	MGC103372
ILMN_1216883	Raver1	157.131	309.877	310.575	374.546	181.777	108.577	1.9721	1.20597	1	0.59731	Mus musculus ribonucleoprotein, PTB-binding 1 (Raver1), mRNA,	1300006N24Rik; KIAA1978; MGC118403; mKIAA1978
ILMN_2641069	Plekhj1	60.7681	63.9682	73.8371	54.1687	68.7805	41.0921	1.05266	0.733624	1	0.597439	Mus musculus pleckstrin homology domain containing, family J member 1 (Plekhj1), mRNA,	9530063M10Rik
ILMN_2972929	1110034A24Rik	87.1953	74.9427	177.577	127.313	112.509	67.2534	0.859481	0.716944	1	0.59776	Mus musculus RIKEN cDNA 1110034A24 gene (1110034A24Rik), mRNA,	AV032410; 2810020C19Rik
ILMN_1246725	Mrps6	279.682	285.07	346.98	262.87	279.374	167.061	1.01926	0.757595	1	0.597983	Mus musculus mitochondrial ribosomal protein S6 (Mrps6), nuclear gene encoding mitochondrial protein, mRNA,	AW046321
ILMN_2894497	Rfc2	1081.96	698.638	1896.22	1117.98	1030.97	616.663	0.645714	0.589583	1	0.598136	Mus musculus replication factor C (activator 1) 2 (Rfc2), mRNA,	MGC117486; Recc2; 40kDa; AI326953; 2610008M13Rik
ILMN_1260378	Csrp1	221.668	200.893	333.369	326.097	252.566	151.15	0.906279	0.978187	1	0.598455	Mus musculus cysteine and glycine-rich protein 1 (Csrp1), mRNA,	AA959891; CRP1; Csrp; AA408841; AW545626
ILMN_1225235	Mta1	119.569	99.7469	75.2978	46.3511	104.256	62.4093	0.834222	0.61557	1	0.598616	Mus musculus metastasis associated 1 (Mta1), mRNA,	MGC118456
ILMN_2594525	Nsdhl	35.0886	32.0255	125.848	122.317	86.4368	51.7453	0.912702	0.971944	1	0.598649	Mus musculus NAD(P) dependent steroid dehydrogenase-like (Nsdhl), mRNA,	H105E3; Str; XAP104; Bpa; AI747449
ILMN_2707137	Phf17	362.567	145.534	729.718	270.09	624.518	374.059	0.4014	0.370129	1	0.598957	Mus musculus PHD finger protein 17 (Phf17), mRNA,	AU041499; mKIAA1807; D530048A03Rik; Jade1
ILMN_2971999	Iqgap3	59.7374	53.7318	41.1307	37.5957	52.6617	31.5459	0.899466	0.914055	1	0.599029	Mus musculus IQ motif containing GTPase activating protein 3 (Iqgap3), mRNA, XM_980709 XM_987883 XM_987929 XM_987972 XM_988004 XM_988041 XM_988104	D030034H08
ILMN_2896582	Snx6	427.217	522.127	734.891	641.12	552.374	330.894	1.22216	0.872401	1	0.59904	Mus musculus sorting nexin 6 (Snx6), mRNA,	C85963; 2010006G21Rik; 2810425K19Rik; 2610032J07Rik; AU018928
ILMN_2788574	Gmip	556.103	376.948	360.507	168.369	328.902	197.067	0.677839	0.467034	1	0.599165	Mus musculus Gem-interacting protein (Gmip), mRNA,	5031419I10Rik
ILMN_2990229	3300001G02Rik	1051.74	926.731	893.924	890.816	981.664	588.341	0.881142	0.996522	1	0.59933	Mus musculus RIKEN cDNA 3300001G02 gene (3300001G02Rik), mRNA,	C16ORF33; AL033324
ILMN_2432040	Zzz3	32.67	35.0283	72.0318	78.8418	42.8892	25.7077	1.07219	1.09454	1	0.599398	Mus musculus zinc finger, ZZ domain containing 3 (Zzz3), transcript variant 1, mRNA,	AW556059; 6430567E01Rik; AI481057; R75514; AA408566; 3110065C23Rik
ILMN_2645276	Spsb3	52.0644	48.6081	66.3433	61.3596	52.8343	31.6702	0.933614	0.92488	1	0.599424	Mus musculus splA/ryanodine receptor domain and SOCS box containing 3 (Spsb3), mRNA,	SSB3; mKIAA4204; Tce1; 3300001M01Rik; KIAA4204; 2310012N15Rik
ILMN_2899174	Efha1	336.2	252.865	527.286	531.119	384.999	230.843	0.752126	1.00727	1	0.599593	Mus musculus EF hand domain family A1 (Efha1), mRNA,	4833427E09Rik; Smhs2; AU041871; 1110008L20Rik
ILMN_2728385	Smc6	81.2238	68.2241	245.302	172.835	137.312	82.3342	0.839952	0.704581	1	0.599615	Mus musculus structural maintenance of chromosomes 6 (Smc6), mRNA,	Smc6l1; KIAA4103; MGC96146; AA990493; AW742439; AU018782; 3830418C19Rik; mKIAA4103; 2810489L22Rik
ILMN_1248254	Gfm1	134.234	77.8579	350.639	206.673	186.766	112.019	0.580015	0.589419	1	0.599782	Mus musculus G elongation factor, mitochondrial 1 (Gfm1), mRNA,	Gfm; D3Wsu133e; AW545374
ILMN_2957167	4931417G12Rik	27.485	26.5719	28.009	29.1987	34.7886	20.8708	0.966779	1.04248	1	0.599931	Mus musculus RIKEN cDNA 4931417G12 gene (4931417G12Rik), mRNA,
ILMN_2736530	LOC100047490	4720.19	2568.2	8819.95	5254.03	4183.4	2510.17	0.544089	0.595698	1	0.600032	PREDICTED: Mus musculus similar to putative oral cancer suppressor (LOC100047490), mRNA,
ILMN_2880529	Uck2	343.233	247.428	556.248	273.469	338.7	203.331	0.720874	0.491632	1	0.600329	Mus musculus uridine-cytidine kinase 2 (Uck2), mRNA,	UK; AI481316; AU020720; UMK; TSA903; Umpk; AU018180; AA407809
ILMN_1228358	Wee1	30.4287	22.9203	69.3398	32.6999	36.427	21.8709	0.753246	0.471589	1	0.600404	Mus musculus WEE 1 homolog (S, pombe) (Wee1), mRNA,
ILMN_1231392	Melk	28.9468	27.4322	147.149	115.209	45.0295	27.0504	0.947679	0.782939	1	0.600727	Mus musculus maternal embryonic leucine zipper kinase (Melk), mRNA,	mKIAA0175; AI327312; MPK38
ILMN_2636335	Sfrs2	4366.32	4467.23	8614.41	5738.4	4705.8	2827.01	1.02311	0.66614	1	0.600751	Mus musculus splicing factor, arginine/serine-rich 2 (SC-35) (Sfrs2), mRNA,	Pr264; D11Wsu175e; MRF-1; SC35; Sfrs10
ILMN_2837100	Gm128	26.7206	23.2077	30.735	24.9239	33.1512	19.9189	0.868532	0.81093	1	0.600851	Mus musculus gene model 128, (NCBI) (Gm128), mRNA,
ILMN_2867835	Mif	12408.5	11844.5	12267.9	8711.01	16597.3	9972.65	0.95455	0.710065	1	0.600858	Mus musculus macrophage migration inhibitory factor (Mif), mRNA,	Glif; MGC107654; GIF
ILMN_2694917	Sap30	1726.56	1237.69	2917.26	1944.08	2070.75	1244.38	0.71685	0.666405	1	0.600935	Mus musculus sin3 associated polypeptide (Sap30), mRNA,	30kDa
ILMN_1249829	Mybl2	37.4084	29.1116	53.2218	28.6869	38.2948	23.0166	0.77821	0.539007	1	0.601036	Mus musculus myeloblastosis oncogene-like 2 (Mybl2), mRNA,	Bmyb
ILMN_2610771	Net1	63.1746	50.1638	199.402	142.541	131.868	79.3394	0.794051	0.714839	1	0.601657	Mus musculus neuroepithelial cell transforming gene 1 (Net1), transcript variant 2, mRNA,	AU015857; 0610025H04Rik; mNET1; 9530071N24Rik; AI604373; Net1a
ILMN_2741114	Gusb	86.1407	38.1821	257.201	120.695	125.217	75.3571	0.443253	0.469264	1	0.601812	Mus musculus glucuronidase, beta (Gusb), mRNA,	Gus-r; Gur; Gus-u; Gut; asd; AI747421; Gus-t; Gus; Gus-s; g
ILMN_2689138	2310044G17Rik	198.791	100.986	421.14	233.783	214.499	129.21	0.508001	0.55512	1	0.602382	Mus musculus RIKEN cDNA 2310044G17 gene (2310044G17Rik), mRNA,	AI842544; AI853744; mKIAA1737
ILMN_1258421	1110007A13Rik	889.856	780.74	1384.15	859.796	736.568	443.728	0.877378	0.621173	1	0.602427	Mus musculus RIKEN cDNA 1110007A13 gene (1110007A13Rik), mRNA,	AU017382; MGC36596; BC025641
ILMN_2810645	Ehd2	50.7541	30.5913	119.943	44.6306	72.6129	43.7627	0.602736	0.372098	1	0.602685	Mus musculus EH-domain containing 2 (Ehd2), mRNA,	MGC25606; C130052H20Rik; MGC38650; BC027084
ILMN_3106819	Bag5	283.799	246.876	493.102	321.187	312.532	188.411	0.869898	0.651361	1	0.602854	Mus musculus BCL2-associated athanogene 5 (Bag5), mRNA,	1600025G07Rik; 4930405J06Rik
ILMN_2678373	Myst4	172.187	341.706	313.793	587.455	223.446	134.774	1.98451	1.87211	1	0.603161	Mus musculus MYST histone acetyltransferase monocytic leukemia 4 (Myst4), mRNA,	querkopf; qkf; mKIAA0383; Morf; B130044K16Rik; AI507552
ILMN_2709935	Syncrip	64.9524	43.6954	253.798	109.025	73.7356	44.4746	0.672729	0.429575	1	0.603164	Mus musculus synaptotagmin binding, cytoplasmic RNA interacting protein (Syncrip), transcript variant 2, mRNA,	Nsap1; pp68; Nsap1l; 4632417O19Rik; GRY-RBP; 2610109K23Rik
ILMN_2637784	Spast	159.065	113.193	616.297	311.24	175.425	105.852	0.711619	0.505016	1	0.603403	Mus musculus spastin (Spast), mRNA,	mKIAA1083; Spg4
ILMN_2647627	Ppp1cb	110.463	99.6496	1045.84	818.388	355.508	214.565	0.90211	0.782516	1	0.603545
ILMN_2704919	Ube2t	68.7511	65.5741	267.111	209.68	178.087	107.516	0.953789	0.784992	1	0.603726	Mus musculus ubiquitin-conjugating enzyme E2T (putative) (Ube2t), mRNA,	C80607; 2700084L22Rik
ILMN_2611857	Tk1	26.799	22.5865	37.0516	27.1927	39.0607	23.5917	0.842811	0.733913	1	0.603976	Mus musculus thymidine kinase 1 (Tk1), mRNA,	D530002A18Rik; Tk1a; Tk-1; Tk1b
ILMN_1235653	Sfrs2	51.681	52.7117	152.785	99.3902	79.6504	48.1274	1.01994	0.650524	1	0.604233	Mus musculus splicing factor, arginine/serine-rich 2 (SC-35) (Sfrs2), mRNA,	Pr264; D11Wsu175e; MRF-1; SC35; Sfrs10
ILMN_1255201	Dhfr	33.6506	30.4098	54.2727	30.5373	39.6092	23.9382	0.903693	0.562664	1	0.60436	Mus musculus dihydrofolate reductase (Dhfr), mRNA,	AW555094; AA607882; AI662710; 8430436I03Rik
ILMN_2765733	Polg	84.5703	115.007	91.4303	103.032	86.98	52.6058	1.3599	1.12689	1	0.604804	Mus musculus polymerase (DNA directed), gamma (Polg), mRNA,	AA409516; PolgA
ILMN_1259339	Cdk5r1	149.876	151.297	508.956	409.975	238.147	144.061	1.00948	0.805521	1	0.604924	Mus musculus cyclin-dependent kinase 5, regulatory subunit 1 (p35) (Cdk5r1), mRNA,	Cdk5r; p35; p25; D11Bwg0379e
ILMN_1251465	Kctd9	59.5492	61.487	145.66	105.801	84.7196	51.2777	1.03254	0.726356	1	0.605263	Mus musculus potassium channel tetramerisation domain containing 9 (Kctd9), mRNA,	AI854539; AA675328
ILMN_2828731	Scrib	319.949	400.118	171.426	144.655	230.493	139.61	1.25057	0.843837	1	0.6057	Mus musculus scribbled homolog (Drosophila) (Scrib), mRNA,	Scrb1; CRIB; mKIAA0147; vartul; Crc; SCRIB1; AI118201; KIAA0147
ILMN_2939990	Tarbp2	106.427	78.4139	131.315	92.8123	87.5832	53.0541	0.736784	0.70679	1	0.605756	Mus musculus TAR (HIV) RNA binding protein 2 (Tarbp2), mRNA,	Prbp
ILMN_2962958	Nudc	4839.69	3098.35	8527.55	4695.97	4599.56	2788.57	0.640197	0.550682	1	0.606269	Mus musculus nuclear distribution gene C homolog (Aspergillus) (Nudc), mRNA,	Silg92; SIG-92
ILMN_1217039	2010321M09Rik	462.672	362.622	1395.6	1433.04	515.172	312.452	0.783757	1.02683	1	0.606501	Mus musculus RIKEN cDNA 2010321M09 gene (2010321M09Rik), transcript variant 1, mRNA,
ILMN_2615855	Hnrnpa2b1	1072.86	830.968	4676.11	4289.5	3023.84	1837.14	0.774535	0.917322	1	0.607551	Mus musculus heterogeneous nuclear ribonucleoprotein A2/B1 (Hnrnpa2b1), transcript variant 2, mRNA,	Hnrpa2; 9130414A06Rik; hnrnp-A
ILMN_2481391	Zfp326	123.675	71.7329	75.1234	65.9438	78.4801	47.6858	0.580012	0.877806	1	0.607617	Mus musculus zinc finger protein 326 (Zfp326), mRNA,	5730470H14Rik; ZAN75
ILMN_1227163	Nars	251.658	170.502	562.507	314.048	204.164	124.098	0.677516	0.5583	1	0.607837	Mus musculus asparaginyl-tRNA synthetase (Nars), mRNA,	C78150; AA960128; ASNRS; 3010001M15Rik
ILMN_2748321	Rad51c	43.5506	33.2596	85.5874	71.7903	71.7213	43.6041	0.763699	0.838795	1	0.607965	Mus musculus Rad51 homolog c (S, cerevisiae) (Rad51c), mRNA,	Rad51l2
ILMN_2686044	Eif5a	2602.84	1606.28	3416.79	2134.56	2893.29	1759.38	0.617125	0.624725	1	0.60809	Mus musculus eukaryotic translation initiation factor 5A (Eif5a), mRNA,	uORF3; MGC6725; uORF; D19Wsu54e; uORF2; AA410058; uORF1; Eif4d
ILMN_2972392	Hax1	157.697	135.368	263.052	279.165	217.173	132.082	0.858405	1.06126	1	0.608189	Mus musculus HCLS1 associated X-1 (Hax1), mRNA,	HAX-1; mHAX-1s; SIG-111; Hs1bp1; Silg111
ILMN_1249428	Tmed1	59.2965	59.3609	67.2234	40.1704	47.6335	28.9859	1.00109	0.597566	1	0.608519	Mus musculus transmembrane emp24 domain containing 1 (Tmed1), mRNA,	Il1rl1l; Ly84l; St2l
ILMN_2680827	Il7r	67.4459	28.0636	136.488	27.7561	69.8863	42.5522	0.416091	0.203359	1	0.608878	Mus musculus interleukin 7 receptor (Il7r), mRNA,	IL-7Ralpha; CD127; MGC107557
ILMN_2659762	Mrpl18	517.426	216.97	753.264	417.875	513.322	312.566	0.419326	0.554752	1	0.608909	Mus musculus mitochondrial ribosomal protein L18 (Mrpl18), nuclear gene encoding mitochondrial protein, mRNA,	HSPC071; MRP-L18; 1010001C05Rik; C79879
ILMN_2709681	Hdlbp	51.0573	69.532	89.2041	110.024	59.6978	36.3614	1.36184	1.23339	1	0.609091	Mus musculus high density lipoprotein (HDL) binding protein (Hdlbp), mRNA,	1110005P14Rik; D1Ertd101e; AA960365; AI118566
ILMN_2630641	Srm	1179.14	360.48	3491.2	1788.68	1630.37	993.115	0.305714	0.512339	1	0.609136	Mus musculus spermidine synthase (Srm), mRNA,	SpdSy; AA407669
ILMN_1237234	Tarsl2	57.8242	76.9674	98.1854	155.938	91.7956	55.9259	1.33106	1.58819	1	0.609244	Mus musculus threonyl-tRNA synthetase-like 2 (Tarsl2), mRNA,	MGC31414; A530046H20Rik
ILMN_3075157	Tdrd3	30.125	28.668	109.622	87.4286	52.0938	31.7451	0.951633	0.797547	1	0.609383	Mus musculus tudor domain containing 3 (Tdrd3), mRNA,	6720468N18; 4732418C03Rik
ILMN_2840296	Pole3	641.797	502.29	481.241	368.513	397.2	242.111	0.782631	0.765756	1	0.609546	Mus musculus polymerase (DNA directed), epsilon 3 (p17 subunit) (Pole3), mRNA,	YBL1; 1810034K18Rik
ILMN_2604494	Podxl	172.137	113.997	337.062	190.997	159.985	97.5211	0.662248	0.566652	1	0.609564	Mus musculus podocalyxin-like (Podxl), mRNA,	Ly102; Pclp1; AW121214; PC
ILMN_2732689	Smc1a	843.889	897.401	1380.61	1686.47	901.313	549.507	1.06341	1.22154	1	0.609674	Mus musculus structural maintenance of chromosomes 1A (Smc1a), mRNA,	SMCB; KIAA0178; mKIAA0178; SB1,8; Smc1l1; Smc1alpha; 5830426I24Rik; Smc1
ILMN_2651126	Lyar	689.764	319.259	2189.64	683.901	769.371	469.092	0.462852	0.312335	1	0.609709	Mus musculus Ly1 antibody reactive clone (Lyar), mRNA,
ILMN_2723438	Nubp2	245.715	107.57	334.419	139.944	234.697	143.122	0.437782	0.41847	1	0.609816	Mus musculus nucleotide binding protein 2 (Nubp2), mRNA,	D17Wsu11e
ILMN_1227300	Ap2m1	286.431	243.052	494.407	568.894	276.404	168.596	0.848553	1.15066	1	0.609963	Mus musculus adaptor protein complex AP-2, mu1 (Ap2m1), mRNA,	MGC102136
ILMN_1215242	Eif2b1	618.134	418.187	826.113	555.904	637.104	388.672	0.676531	0.672915	1	0.61006	Mus musculus eukaryotic translation initiation factor 2B, subunit 1 (alpha) (Eif2b1), mRNA,	26kDa; D5Ertd406e; MGC6458; EIF2BA; EIF2B
ILMN_2625747	Ncapd2	63.4364	60.8614	68.653	45.0657	67.5317	41.1988	0.959407	0.656428	1	0.610066	Mus musculus non-SMC condensin I complex, subunit D2 (Ncapd2), mRNA,	MGC39046; mKIAA0159; CAP-D2; 2810406C15Rik; CNAP1
ILMN_1244797	Dlgap5	166.606	169.941	256.72	300.624	239.767	146.313	1.02002	1.17102	1	0.61023	Mus musculus discs, large (Drosophila) homolog-associated protein 5 (Dlgap5), mRNA,	C86398; mKIAA0008; Hurp; C77459
ILMN_1230790	Patl1	173.1	147.488	349.812	211.307	192.432	117.484	0.852039	0.604058	1	0.610524	Mus musculus protein associated with topoisomerase II homolog 1 (yeast) (Patl1), mRNA,	D430024J04
ILMN_3109076	Dcun1d2	60.953	92.7729	106.08	118.379	62.15	37.9499	1.52204	1.11594	1	0.610618	Mus musculus DCN1, defective in cullin neddylation 1, domain containing 2 (S, cerevisiae) (Dcun1d2), transcript variant 3, mRNA,	mFLJ10704; AW495713
ILMN_2624448	Ppa2	231.449	108.646	581.974	433.96	442.821	270.425	0.469419	0.745669	1	0.610688	Mus musculus pyrophosphatase (inorganic) 2 (Ppa2), nuclear gene encoding mitochondrial protein, mRNA,	MGC6539; Sid6306; 1110013G13Rik
ILMN_1240950	Usp1	240.181	174.485	323.081	157.133	176.761	107.957	0.726474	0.486359	1	0.610749	Mus musculus ubiquitin specific peptdiase 1 (Usp1), mRNA,	MGC25559
ILMN_2670713	Cyfip2	149.936	108.902	703.366	352.334	272.185	166.386	0.726325	0.500925	1	0.611296	Mus musculus cytoplasmic FMR1 interacting protein 2 (Cyfip2), mRNA,	mKIAA1168; Pir121; 1500004I01Rik; AU022376; AA930218; 6430511D02Rik
ILMN_2669793	Ccnd1	249.996	206.017	194.407	62.1093	123.419	75.4864	0.824081	0.319481	1	0.611626	Mus musculus cyclin D1 (Ccnd1), mRNA,	AI327039; PRAD1; bcl-1; Cyl-1
ILMN_2807084	Acot7	529.346	323.333	479.832	277.395	372.394	227.799	0.610816	0.578109	1	0.611715	Mus musculus acyl-CoA thioesterase 7 (Acot7), mRNA,	LACH1; AU015130; AU042212; Bach; ACH1; 2410041A17Rik; ACT; CTE-II; AW557066
ILMN_2760840	Ppp1r8	272.514	201.362	627.621	370.132	283.658	173.545	0.738906	0.589737	1	0.611812	Mus musculus protein phosphatase 1, regulatory (inhibitor) subunit 8 (Ppp1r8), mRNA,	6330548N22Rik; MGC38560; AU044684; NIPP1
ILMN_3160881	Vrk3	267.065	384.588	344.448	680.163	267.153	163.474	1.44005	1.97464	1	0.611913	Mus musculus vaccinia related kinase 3 (Vrk3), mRNA,	AI428238
ILMN_2656871	Tmem97	1022.92	621.4	1149.68	655.694	825.075	505.065	0.607479	0.570328	1	0.612144	Mus musculus transmembrane protein 97 (Tmem97), mRNA,	1810014L12Rik; D11Bhm182e; RP23-399H5,9; AI115531; AL022956; MGC102369
ILMN_2862111	Hmgn2	3287.01	4450.01	7335.35	11849.5	4707.33	2882.53	1.35382	1.6154	1	0.61235	Mus musculus high mobility group nucleosomal binding domain 2 (Hmgn2), mRNA,	MGC103384; MGC102472; MGC103137; MGC118420; Hmg17; HMG-17
ILMN_1221568	Cdca7	2066.36	1330.58	4821.55	1812.15	2603.58	1594.69	0.643925	0.375844	1	0.612502	Mus musculus cell division cycle associated 7 (Cdca7), mRNA,	JPO1; 2310021G01Rik; AU044109
ILMN_1250063	Ppp2r5d	421.584	505.936	330.035	321.441	281.737	172.601	1.20008	0.973961	1	0.61263	Mus musculus protein phosphatase 2, regulatory subunit B (B56), delta isoform (Ppp2r5d), mRNA,	TEG-271; Tex271
ILMN_2943057	Arl5c	247.086	138.556	263.02	361.629	281.791	172.734	0.560758	1.37491	1	0.612989	Mus musculus ADP-ribosylation factor-like 5C (Arl5c), mRNA,	Arl12; MGC73657; BC065791
ILMN_2764466	Capsl	33.6427	21.1272	48.1975	22.7178	60.2109	36.9236	0.62799	0.471348	1	0.613238	Mus musculus calcyphosine-like (Capsl), mRNA,	1700028N11Rik; AW125205; MGC74120
ILMN_2753497	Ccnb1	445.328	299.81	1838.37	1144.06	713.029	437.347	0.673234	0.622319	1	0.613366	Mus musculus cyclin B1 (Ccnb1), mRNA,	MGC90915; Ccnb1-rs13; MGC18763; Cycb-4
ILMN_2792089	Srebf1	29.7026	30.3698	37.335	27.1985	38.0695	23.3529	1.02246	0.728497	1	0.613428	Mus musculus sterol regulatory element binding factor 1 (Srebf1), mRNA,	SREBP-1c; SREBP-1; D630008H06; SREBP-1a; ADD1; SREBP1; ADD-1
ILMN_2820369	Gstcd	90.0509	93.1665	131.255	80.6818	98.3127	60.3421	1.0346	0.614693	1	0.613777	Mus musculus glutathione S-transferase, C-terminal domain containing (Gstcd), mRNA,	MGC74393; 4933434L15Rik
ILMN_2624574	Cep135	57.3987	42.755	115.572	87.7935	73.7315	45.2847	0.744878	0.759643	1	0.614184	Mus musculus centrosomal protein 135 (Cep135), mRNA,	Cep4; Gm1044; MGC86039; BC062951
ILMN_2968729	Nqo2	131.144	85.4558	138.564	111.919	95.077	58.4011	0.65162	0.807708	1	0.614251	Mus musculus NAD(P)H dehydrogenase, quinone 2 (Nqo2), mRNA,	Nmor2; Ox2; NMO2; Ox-2
ILMN_2736347	Prmt7	1623.2	1394.1	2400.89	2163.78	1648.16	1013.06	0.858857	0.901243	1	0.614663	Mus musculus protein arginine N-methyltransferase 7 (Prmt7), mRNA,	4933402B05Rik; BC006705; MGC7929
ILMN_2751887	2310033P09Rik	48.773	50.5683	93.599	109.234	51.9553	31.9412	1.03681	1.16704	1	0.614782	Mus musculus RIKEN cDNA 2310033P09 gene (2310033P09Rik), mRNA,	RP23-192P17,3; MGC7354
ILMN_2747031	Dhcr24	174.64	160.51	324.977	173.744	171.255	105.344	0.919092	0.534633	1	0.615132
ILMN_2686571	Psmc3	1279.83	785.961	1364.34	938.193	752.652	463.024	0.614111	0.687652	1	0.61519	Mus musculus proteasome (prosome, macropain) 26S subunit, ATPase 3 (Psmc3), mRNA,	TBP-1
ILMN_2836137	E2f2	928.652	976.599	1567.37	855.551	1136.32	699.164	1.05163	0.545853	1	0.615287	Mus musculus E2F transcription factor 2 (E2f2), mRNA,	E130207A07
ILMN_2914957	Znhit3	405.592	239.232	477.632	286.977	387.683	238.573	0.589835	0.600833	1	0.615381	Mus musculus zinc finger, HIT type 3 (Znhit3), mRNA,	Myohd1; Trip3; MGC107312
ILMN_2692762	Ap4m1	38.9468	39.5712	61.5738	69.0991	50.8512	31.2948	1.01603	1.12222	1	0.615419	Mus musculus adaptor-related protein complex AP-4, mu 1 (Ap4m1), mRNA,	Ap4m4; 4930443L05Rik
ILMN_1215632	Marcksl1	29.8363	32.5381	55.631	64.7663	39.7004	24.4586	1.09055	1.16421	1	0.616079	Mus musculus MARCKS-like 1 (Marcksl1), mRNA,	Macs3; F52; AL022768; D4Bc1; Macs-2; AW215397; MacMARCKS; Macs-3; Mrp; Macs2; AW536807; Mlp
ILMN_2635606	Atl3	91.5565	86.6272	132.945	135.643	70.814	43.6506	0.946161	1.0203	1	0.616412	Mus musculus atlastin GTPase 3 (Atl3), mRNA,	4633402C03Rik; AI465397; MGC28761
ILMN_2732801	Rttn	61.9345	52.2853	95.7292	85.7636	66.1465	40.7758	0.844205	0.895898	1	0.616447
ILMN_3075003	Mlf2	128.987	133.861	328.858	374.072	209.871	129.412	1.03779	1.13749	1	0.616625	Mus musculus myeloid leukemia factor 2 (Mlf2), mRNA,	AI256856; C77284; AU018944
ILMN_2762026	Pcna	94.5783	71.8912	516.002	248.296	125.651	77.5815	0.760124	0.481192	1	0.617435	Mus musculus proliferating cell nuclear antigen (Pcna), mRNA,
ILMN_2963754	9430015G10Rik	192.765	448.176	145.419	156.975	156.728	96.7725	2.32499	1.07947	1	0.617455	Mus musculus RIKEN cDNA 9430015G10 gene (9430015G10Rik), mRNA,
ILMN_2648648	Bnip1	136.392	125.239	221.813	161.685	157.599	97.3162	0.918232	0.728927	1	0.617491	Mus musculus BCL2/adenovirus E1B interacting protein 1 (Bnip1), mRNA,	Sec20; MGC41600; 5930429G21Rik
ILMN_2701654	Lig4	49.7196	36.1557	65.0047	36.572	52.1589	32.2105	0.727193	0.562605	1	0.617544	Mus musculus ligase IV, DNA, ATP-dependent (Lig4), mRNA,	tiny; 5830471N16Rik
ILMN_2913089	Brd9	189.539	164.252	209.722	166.18	168.808	104.288	0.866586	0.792379	1	0.617792	Mus musculus bromodomain containing 9 (Brd9), mRNA,	AL022779
ILMN_1223812	Cep57	122.412	115.965	224.706	186.05	145.602	90.0387	0.947338	0.82797	1	0.61839	Mus musculus centrosomal protein 57 (Cep57), mRNA,	4931428M20Rik; 4921510P06Rik; 3110002L15Rik; AI467480; Tsp57; mKIAA0092
ILMN_2690306	Polr2d	340.262	254.655	610.873	414.937	426.766	264.019	0.74841	0.679253	1	0.61865	Mus musculus polymerase (RNA) II (DNA directed) polypeptide D (Polr2d), transcript variant 1, mRNA,	2310002G05Rik; RBP4; HSRBP4; 2610028L19Rik
ILMN_1253779	Polh	149.086	89.0067	282.036	129.358	125.314	77.5406	0.597015	0.458656	1	0.61877	Mus musculus polymerase (DNA directed), eta (RAD 30 related) (Polh), mRNA,	RAD30A; XPV
ILMN_2760263	Poldip2	1121.53	815.975	2266.33	1795.07	1087.36	672.869	0.727554	0.792059	1	0.618811	Mus musculus polymerase (DNA-directed), delta interacting protein 2 (Poldip2), mRNA,	RP23-399H5,6; Pdip38; 1300003F06Rik
ILMN_2428963	Xpnpep1	44.528	41.5381	125.713	154.29	71.9374	44.5211	0.932853	1.22732	1	0.618887	Mus musculus X-prolyl aminopeptidase (aminopeptidase P) 1, soluble (Xpnpep1), mRNA,	D230045I08Rik
ILMN_2670727	Gtf3a	790.393	533.595	952.097	552.967	742.317	459.437	0.675102	0.580789	1	0.618923	Mus musculus general transcription factor III A (Gtf3a), mRNA,	5330403M05Rik; 2610111I01Rik; 2010015D03Rik
ILMN_2893409	Gfra1	28.1867	28.3076	27.9984	27.28	36.093	22.3509	1.00429	0.974342	1	0.619261	Mus musculus glial cell line derived neurotrophic factor family receptor alpha 1 (Gfra1), mRNA,	AU042498
ILMN_1245003	Odf2	54.1854	56.7249	53.9957	50.7085	41.0893	25.4466	1.04687	0.939121	1	0.619299	Mus musculus outer dense fiber of sperm tails 2 (Odf2), mRNA,	MMTEST29; AI848335
ILMN_2750801	Rpa1	2020.61	1589.69	4034.31	2665.1	1946.53	1205.5	0.786737	0.660608	1	0.619307	Mus musculus replication protein A1 (Rpa1), mRNA,	Rpa; 70kDa; 5031405K23Rik; AW557552; AA589576; RF-A; RP-A
ILMN_2608811	Cbr3	288.822	86.3999	494.866	162.582	359.659	222.756	0.299146	0.328538	1	0.619354	Mus musculus carbonyl reductase 3 (Cbr3), mRNA,	1110001J05Rik; C81353; MGC99956
ILMN_2716567	Bnip3l	503.465	812.232	1830.16	2826.38	1506.17	932.895	1.61328	1.54433	1	0.619381	Mus musculus BCL2/adenovirus E1B interacting protein 3-like (Bnip3l), mRNA,	C86132; Nip3L; D14Ertd719e; Nix
ILMN_3084087	Ivns1abp	281.648	319.762	991.17	519.451	545.844	338.087	1.13533	0.524078	1	0.619383	Mus musculus influenza virus NS1A binding protein (Ivns1abp), transcript variant 1, mRNA,	1700126I16Rik; Nd1-L; 1190004M08Rik; Nd1-S; NS1-BP; NS-1; ND1; HSPC068; AA960440; mKIAA0850
ILMN_2808939	0610007P14Rik	389.224	277.231	474.054	393.851	409.02	253.358	0.712266	0.830815	1	0.619428	Mus musculus RIKEN cDNA 0610007P14 gene (0610007P14Rik), mRNA,	AU019315; C77855; 1190004E09Rik; ORF11
ILMN_1226712	Ccdc134	163.157	170.627	226.172	54.6055	137.666	85.2974	1.04578	0.241434	1	0.619599	Mus musculus coiled-coil domain containing 134 (Ccdc134), mRNA,	2310042L06Rik; AW208859
ILMN_2923865	Casp6	93.8834	112.513	157.555	215.962	155.295	96.2264	1.19844	1.37071	1	0.619635	Mus musculus caspase 6 (Casp6), mRNA,	Mch2; mCASP-6
ILMN_2764995	Ipo5	555.57	350.037	1083.34	544.895	707.784	438.579	0.63005	0.502975	1	0.619651	Mus musculus importin 5 (Ipo5), mRNA,	Kpnb3; IMB3; C76941; 5730478E03Rik; 1110011C18Rik; IPO5; AA409333
ILMN_2755666	Apbb1ip	122.417	57.1	148.496	56.951	84.5605	52.3994	0.466438	0.383518	1	0.619668
ILMN_2944150	Sfrs4	657.817	618.833	882.067	553.666	654.856	405.806	0.940738	0.627691	1	0.619686	Mus musculus splicing factor, arginine/serine-rich 4 (SRp75) (Sfrs4), mRNA,	MNCb-2616; 5730499P16Rik; AW550192
ILMN_2707782	Afg3l1	78.5038	66.8572	86.2167	86.2556	85.8591	53.2081	0.851642	1.00045	1	0.619714	Mus musculus AFG3(ATPase family gene 3)-like 1 (yeast) (Afg3l1), mRNA,	1700047G05Rik; 3110061K15Rik
ILMN_3003290	Hdgf	5218.3	3277.84	10711.9	6265.16	6543.15	4055.38	0.628144	0.584881	1	0.61979	Mus musculus hepatoma-derived growth factor (Hdgf), mRNA,	AI118077; D3Ertd299e
ILMN_2974418	Wdr51b	198.006	117.223	328.602	141.715	198.076	122.78	0.592016	0.431267	1	0.619864	Mus musculus WD repeat domain 51B (Wdr51b), mRNA,	4933430F16Rik
ILMN_1233513	Rdbp	359.652	220.097	464.154	196.636	265.492	164.618	0.611972	0.423645	1	0.620047	Mus musculus RD RNA-binding protein (Rdbp), transcript variant 3, mRNA,	D17H6S45; NELF-E; RD
ILMN_1236139	Myef2	127.909	82.4404	364.92	231.853	120.382	74.6772	0.644522	0.635353	1	0.620334	Mus musculus myelin basic protein expression factor 2, repressor (Myef2), mRNA,	9430071B01; mKIAA1341
ILMN_2852672	Tspan32	43.3637	24.82	122.307	84.9132	58.0168	35.9902	0.572368	0.694264	1	0.620341	Mus musculus tetraspanin 32 (Tspan32), mRNA,	Phemx; Art-1; Tssc6; D7Wsu37e; AW208513; BB235973
ILMN_2957862	Noc4l	622.739	330.316	1092.71	475.339	601.671	373.252	0.530423	0.435009	1	0.62036	Mus musculus nucleolar complex associated 4 homolog (S, cerevisiae) (Noc4l), mRNA,	AI326906; MGC28606
ILMN_3123657	Vrk1	96.9662	80.5239	136.494	98.717	109.153	67.7146	0.830432	0.723234	1	0.620363	Mus musculus vaccinia related kinase 1 (Vrk1), transcript variant 2, mRNA,	51PK
ILMN_2821736	Jmjd5	177.619	98.658	355.544	173.431	174.3	108.13	0.555449	0.487792	1	0.620366	Mus musculus jumonji domain containing 5 (Jmjd5), mRNA,	3110005O21Rik
ILMN_2963974	Gemin4	915.785	560.08	1351.95	647.294	652.116	404.576	0.611585	0.478787	1	0.620404	Mus musculus gem (nuclear organelle) associated protein 4 (Gemin4), mRNA,	AU015359; MGC28146; 4932415L08Rik
ILMN_1251165	Pcgf6	330.5	360.233	1046.26	717.424	412.683	256.148	1.08996	0.6857	1	0.62069	Mus musculus polycomb group ring finger 6 (Pcgf6), mRNA,	MBLR; Rnf134; 4933407A11Rik; AI604840; MGC106622
ILMN_2916035	Lmnb1	1462.32	906.873	3702.6	1779.68	1946.25	1208.53	0.62016	0.480658	1	0.620953	Mus musculus lamin B1 (Lmnb1), mRNA,
ILMN_2856157	Pgam1	475.478	292.261	1077.01	643.665	753.054	467.627	0.614668	0.59764	1	0.620974	Mus musculus phosphoglycerate mutase 1 (Pgam1), mRNA,	Pgam-1; 2310050F24Rik; MGC118049; MGC102422
ILMN_2723997	Rfwd3	38.7188	42.6038	67.3581	63.6189	50.465	31.3636	1.10034	0.944488	1	0.621493	Mus musculus ring finger and WD repeat domain 3 (Rfwd3), mRNA,	BC027246; MGC27888
ILMN_1254231	Uck1	43.525	36.76	116.697	128.898	80.3277	49.9288	0.844573	1.10455	1	0.621564	Mus musculus uridine-cytidine kinase 1 (Uck1), mRNA,	URK1; Umpk
ILMN_1243679	Cep55	79.6436	56.4291	351.907	181.639	145.397	90.4195	0.70852	0.516156	1	0.62188	Mus musculus centrosomal protein 55 (Cep55), mRNA,	2700032M20Rik; 1200008O12Rik
ILMN_1253601	Aacs	358.872	420.384	826.6	749.867	436.733	271.599	1.1714	0.90717	1	0.621887	Mus musculus acetoacetyl-CoA synthetase (Aacs), mRNA,	SUR5; 2210408B16Rik
ILMN_3060766	Atl2	44.0002	55.4458	108.876	110.871	66.0438	41.0746	1.26012	1.01832	1	0.621929	Mus musculus atlastin GTPase 2 (Atl2), transcript variant 1, mRNA,	AV334690; AA407293; 2010110I21Rik; Aip-2
ILMN_1251184	Nrf1	342.174	372.384	650.984	691.828	440.724	274.153	1.08829	1.06274	1	0.622051	Mus musculus nuclear respiratory factor 1 (Nrf1), mRNA,	D6Ertd415e; C87038
ILMN_2727921	Tspo	401.501	233.312	499.342	466.34	639.644	397.902	0.5811	0.93391	1	0.622068	Mus musculus translocator protein (Tspo), mRNA,	IBP; PBR; Bzrp
ILMN_1237750	Polr2f	2308.49	1485.11	1142.92	779.221	1896.49	1180.49	0.643325	0.681782	1	0.622461	Mus musculus polymerase (RNA) II (DNA directed) polypeptide F (Polr2f), mRNA,	1810060D16Rik
ILMN_2824760	LOC241593	51.452	38.7808	72.1226	63.2119	64.071	39.8836	0.753726	0.876451	1	0.622491	Mus musculus similar to protein (peptidyl-prolyl cis/trans isomerase) NIMA-interacting 1 (LOC241593), mRNA,
ILMN_1234086	Dhdh	37.0905	33.1994	109.721	123.394	50.2225	31.2706	0.89509	1.12462	1	0.622641	Mus musculus dihydrodiol dehydrogenase (dimeric) (Dhdh), mRNA,	AA591799; 1300018L09Rik
ILMN_1251296	Elf2	39.8108	49.4365	96.1563	88.8579	52.7124	32.8254	1.24179	0.924099	1	0.622727	Mus musculus E74-like factor 2 (Elf2), mRNA,	2610036A20Rik; NERF; NERF-1A; NERF-2; EU32; NERF-1B; BB183398; AW111824; MGC102660; A230104O07Rik
ILMN_2981821	Mrps7	455.421	218.414	588.935	308.874	392.599	244.589	0.479586	0.524461	1	0.622999	Mus musculus mitchondrial ribosomal protein S7 (Mrps7), mRNA,	Rpms7; MRP-S7
ILMN_1258543	1500001M20Rik	335.582	185.655	400.58	191.745	281.551	175.41	0.553233	0.47867	1	0.623014	Mus musculus RIKEN cDNA 1500001M20 gene (1500001M20Rik), mRNA,
ILMN_2444316	Tpm3	866.054	484.259	3376.82	2168.79	1429.97	891.015	0.559155	0.642257	1	0.623099	Mus musculus tropomyosin 3, gamma (Tpm3), mRNA,	Trop-5; Tpm5; MGC102590; gamma-TM; Tpm-5; Tm5NM; hTM30nm; hTMnm
ILMN_2793616	Lin54	216.523	166.485	617.421	519.186	276.47	172.296	0.768904	0.840895	1	0.623198	Mus musculus lin-54 homolog (C, elegans) (Lin54), mRNA,	KIAA2037; mKIAA2037; AI461788; 4832414L08
ILMN_1245842	Nt5c3l	230.514	181.743	460.888	384.331	320.11	199.643	0.788424	0.833892	1	0.62367	Mus musculus 5'-nucleotidase, cytosolic III-like (Nt5c3l), mRNA,	2610037D24Rik; AI841843; C330027I04Rik
ILMN_2809611	Srm	3055.1	1096.68	3575.96	1461.87	2439.21	1521.72	0.358968	0.408803	1	0.623857	Mus musculus spermidine synthase (Srm), mRNA,	SpdSy; AA407669
ILMN_1252951	Ap2b1	64.2155	50.2634	82.7136	69.6518	63.9019	39.8707	0.78273	0.842084	1	0.623937
ILMN_1216292	Chd1l	37.9688	32.147	69.1045	51.3516	41.696	26.0388	0.846667	0.743101	1	0.624491	Mus musculus chromodomain helicase DNA binding protein 1-like (Chd1l), mRNA,	Snf2p; 4432404A22Rik
ILMN_1231503	Oxct1	873.587	660.384	1572.18	1584.56	1121.06	700.147	0.755945	1.00788	1	0.624539	Mus musculus 3-oxoacid CoA transferase 1 (Oxct1), mRNA,	Scot-s; 2610008O03Rik; Oxct; Oxct2a
ILMN_1246027	Spast	43.4812	39.7566	138.882	77.7906	57.7589	36.0764	0.91434	0.560121	1	0.624604	Mus musculus spastin (Spast), mRNA,	mKIAA1083; Spg4
ILMN_2856599	Chek2	69.8813	60.5036	73.9086	59.6239	75.1202	46.9305	0.865804	0.806725	1	0.624738	Mus musculus CHK2 checkpoint homolog (S, pombe) (Chek2), mRNA,	CHK2; Rad53; HUCDS1; Cds1
ILMN_1221714	3000004C01Rik	77.8589	75.859	130.229	94.7932	79.4929	49.6744	0.974314	0.727897	1	0.624891	Mus musculus RIKEN cDNA 3000004C01 gene (3000004C01Rik), mRNA,
ILMN_2630730	Sf3a1	1025.65	584.568	1736.64	918.936	587.71	367.282	0.569951	0.529145	1	0.624938	Mus musculus splicing factor 3a, subunit 1 (Sf3a1), mRNA,	5930416L09Rik; 1200014H24Rik; AI159724
ILMN_2780454	S100pbp	47.2438	48.7627	63.841	63.3314	49.5925	31.0019	1.03215	0.992018	1	0.625132	Mus musculus S100P binding protein (S100pbp), mRNA,	4930429A08Rik; S100pbpr; AI851343
ILMN_3061300	Acsl3	33.0016	34.2987	43.816	43.4447	31.732	19.8375	1.0393	0.991525	1	0.625157	Mus musculus acyl-CoA synthetase long-chain family member 3 (Acsl3), transcript variant 1, mRNA,	PRO2194; 2610510B12Rik; ACS3; Facl3; C85929
ILMN_2659616	Rac1	69.5472	84.5946	184.097	240.079	160.549	100.375	1.21636	1.30409	1	0.625201	Mus musculus RAS-related C3 botulinum substrate 1 (Rac1), mRNA,	D5Ertd559e; AL023026
ILMN_2841840	Mrps10	252.264	184.159	360.496	279.145	216.782	135.557	0.730022	0.774336	1	0.625316	Mus musculus mitochondrial ribosomal protein S10 (Mrps10), nuclear gene encoding mitochondrial protein, mRNA,	AW743084; Rpms10; 1110038B19Rik
ILMN_2603825	Setd8	469.794	382.482	754.292	386.019	450.151	281.551	0.814149	0.511763	1	0.625458	Mus musculus SET domain containing (lysine methyltransferase) 8 (Setd8), mRNA,	AW536475; 2410195B05Rik; AA617402; MGC117832
ILMN_3002281	Yeats4	1223.88	1233.47	1928.45	2514.8	1913.73	1197.32	1.00784	1.30405	1	0.625647	Mus musculus YEATS domain containing 4 (Yeats4), mRNA,	GAS41; B230215M10Rik; NuBI-1; 4930573H17Rik
ILMN_2759365	Angptl4	415.28	71.9218	898.322	164.377	331.884	207.65	0.173189	0.182982	1	0.62567	Mus musculus angiopoietin-like 4 (Angptl4), mRNA,	HFARP; Bk89; PGARG; PGAR; pp1158; ARP4; Ng27; FIAF
ILMN_3149256	Slc16a3	44.6822	25.5326	42.2873	29.0983	38.1891	23.909	0.571427	0.688109	1	0.626069	Mus musculus solute carrier family 16 (monocarboxylic acid transporters), member 3 (Slc16a3), mRNA,	Mct4; Mct3
ILMN_2423789	Sae1	3365.79	2691.36	5846.48	3815.98	3622.74	2268.72	0.79962	0.652697	1	0.626242	Mus musculus SUMO1 activating enzyme subunit 1 (Sae1), mRNA,	2400010M20Rik; Uble1a; AW743391; AOS1; AL033372; 2610044L12Rik; D7Ertd177e; HSPC140; Sua1
ILMN_2659317	E130306D19Rik	61.1996	46.8471	108.912	113.734	85.4509	53.5279	0.765481	1.04428	1	0.626417
ILMN_2776025	Fkbp1a	925.748	572.032	1394.55	849.928	1122	703.083	0.617914	0.609463	1	0.626636	Mus musculus FK506 binding protein 1a (Fkbp1a), mRNA,	mFKBP12; FKBP12-T1; FKBP12; 12kDa; Fkbp1; Fkbp; FKBP12-T2; mFKBP1
ILMN_2763825	Ipmk	240.892	119.337	452.58	264.296	392.167	245.747	0.495398	0.583975	1	0.626638	Mus musculus inositol polyphosphate multikinase (Ipmk), mRNA,	2410017C19Rik; Impk; AA408208
ILMN_3006990	EG622339	6043.34	5217.69	8630.76	5696.2	8285.09	5194.21	0.863379	0.659988	1	0.626935	Mus musculus predicted gene, EG622339 (EG622339), mRNA,
ILMN_2672208	Med8	263.793	154.168	360.11	217.546	274.681	172.535	0.584426	0.60411	1	0.628129	Mus musculus mediator of RNA polymerase II transcription, subunit 8 homolog (yeast) (Med8), transcript variant 1, mRNA,	MNCb-2386; AB041805; 2210021A15Rik; ARC32
ILMN_2588056	LOC100042427	8059.07	7468.12	9562.64	6495.51	9507.61	5972.59	0.926673	0.679259	1	0.62819	PREDICTED: Mus musculus similar to Glyceraldehyde-3-phosphate dehydrogenase (GAPDH), transcript variant 4 (LOC100042427), mRNA,
ILMN_2594205	Gatad1	285.555	192.267	466.195	342.89	310.405	195.008	0.673311	0.735507	1	0.628236	Mus musculus GATA zinc finger domain containing 1 (Gatad1), mRNA,	2810047M21Rik; 8430439A17Rik; Odag; B330017N08Rik; 2310031E19Rik
ILMN_3021192	Znhit6	74.0004	66.571	203.562	157.662	110.406	69.4376	0.899603	0.774515	1	0.628926	Mus musculus zinc finger, HIT type 6 (Znhit6), mRNA,
ILMN_2597485	Pcyt2	194.149	343.363	289.722	320.519	234.251	147.342	1.76856	1.1063	1	0.628992	Mus musculus phosphate cytidylyltransferase 2, ethanolamine (Pcyt2), mRNA,	ET; 1110033E03Rik
ILMN_1249032	2410129H14Rik	98.6312	77.9602	350.18	265.073	193.132	121.484	0.790421	0.756963	1	0.629021	Mus musculus RIKEN cDNA 2410129H14 gene (2410129H14Rik), mRNA,	AI120158
ILMN_1235908	Fabp5	42.891	32.7989	149.643	56.6185	86.717	54.5762	0.764703	0.378357	1	0.62936	Mus musculus fatty acid binding protein 5, epidermal (Fabp5), mRNA,	mal1; Klbp
ILMN_2956765	Vdac3	718.453	485.502	1960.89	1806.51	1013.79	638.068	0.67576	0.921273	1	0.629391	Mus musculus voltage-dependent anion channel 3 (Vdac3), mRNA,	MGC102096
ILMN_2590482	Polq	39.4333	37.2112	65.6462	38.9495	55.1414	34.7069	0.94365	0.593324	1	0.629416	Mus musculus polymerase (DNA directed), theta (Polq), mRNA,	A430110D14Rik
ILMN_2674979	Fus	449.056	368.512	786.474	730.033	490.901	309.12	0.820637	0.928235	1	0.629698
ILMN_1218041	BC004701	46.5867	37.6377	57.7741	42.0003	58.6828	36.9736	0.807906	0.726976	1	0.630058
ILMN_1239041	Mtch1	1473.11	2219.31	2167.36	3933.45	1693.8	1067.28	1.50655	1.81486	1	0.630109	Mus musculus mitochondrial carrier homolog 1 (C, elegans) (Mtch1), nuclear gene encoding mitochondrial protein, mRNA,	AU018396; C77849; AI255158; 2310034O17Rik; PSAP
ILMN_2681622	Nit2	182.637	197.769	265.055	314.488	208.709	131.62	1.08285	1.1865	1	0.630642	Mus musculus nitrilase family, member 2 (Nit2), mRNA,	1190017B19Rik; D16Ertd502e
ILMN_2933112	Oat	1115.6	1169.62	2678.06	2709.51	1285.19	810.56	1.04842	1.01174	1	0.630693	Mus musculus ornithine aminotransferase (Oat), mRNA,	AI194874
ILMN_2432829	Wdr8	98.3913	94.8733	114.401	110.214	94.2783	59.469	0.964245	0.963401	1	0.630782
ILMN_2690077	Nde1	81.1947	90.2459	133.555	109.738	119.979	75.7126	1.11147	0.82167	1	0.631051	Mus musculus nuclear distribution gene E homolog 1 (A nidulans) (Nde1), mRNA,	mNudE; Nude; AU042936; 2810027M15Rik; AW822251
ILMN_3009558	Oxnad1	96.5429	62.5175	207.881	82.7837	103.875	65.5516	0.647562	0.398226	1	0.631064	Mus musculus oxidoreductase NAD-binding domain containing 1 (Oxnad1), mRNA,	AW492292; MGC30933; BC019806; 2410002F01Rik
ILMN_2843548	Chmp7	68.9043	67.8939	68.9448	68.1916	59.6819	37.6642	0.985337	0.989074	1	0.631082	Mus musculus CHMP family, member 7 (Chmp7), mRNA,	AW550775; 4930596K11Rik; 6330407G04Rik; AI450338; MGC29816
ILMN_2961005	Ier5l	63.697	100.093	73.6943	95.446	83.374	52.632	1.5714	1.29516	1	0.631276	Mus musculus immediate early response 5-like (Ier5l), mRNA,	2610524G09Rik
ILMN_3009010	Suz12	1914.16	1925.38	3884.07	3056.75	2402.06	1516.41	1.00586	0.786995	1	0.631296	Mus musculus suppressor of zeste 12 homolog (Drosophila) (Suz12), mRNA,	mKIAA0160; AU016842; RP23-253E9,4; KIAA0160; D11Ertd530e; AW536442; 2610028O16Rik; AI195385
ILMN_2923671	Rragb	90.3103	56.3165	220.943	172.395	102.545	64.7402	0.623589	0.780271	1	0.631337	Mus musculus Ras-related GTP binding B (Rragb), mRNA,	MGC69750; MGC95567
ILMN_2749303	Ddx20	724.203	579.077	1674.32	894.066	580.97	366.797	0.799606	0.533986	1	0.631353	Mus musculus DEAD (Asp-Glu-Ala-Asp) box polypeptide 20 (Ddx20), mRNA,	MGC159174; GEMIN3; dp103
ILMN_2925567	Nubp2	274.265	148.905	321.627	142.598	231.614	146.386	0.542924	0.443366	1	0.632024	Mus musculus nucleotide binding protein 2 (Nubp2), mRNA,	D17Wsu11e
ILMN_2921526	Capza1	102.252	105.267	483.675	627.331	289.384	182.927	1.02948	1.29701	1	0.632127	Mus musculus capping protein (actin filament) muscle Z-line, alpha 1 (Capza1), mRNA,	Cappa1; CAPZ; CAZ1
ILMN_2739250	Reep4	423.398	382.36	427.956	377.221	498.987	315.523	0.903076	0.881448	1	0.632328	Mus musculus receptor accessory protein 4 (Reep4), mRNA,	2700029E10Rik
ILMN_2673776	E2f2	1067.5	1151.39	1509.84	749.242	1223.6	773.756	1.07859	0.49624	1	0.632358	Mus musculus E2F transcription factor 2 (E2f2), mRNA,	E130207A07
ILMN_2947369	Ppp2r3c	92.0965	67.6737	257.523	142.574	146.047	92.3989	0.734813	0.553634	1	0.632664	Mus musculus protein phosphatase 2, regulatory subunit B'', gamma (Ppp2r3c), mRNA,	G5pr; G4-1; 5730412A08Rik; 4930511A21Rik
ILMN_2630756	Aste1	92.675	78.7111	195.224	112.859	81.8368	51.7788	0.849324	0.578101	1	0.632708	Mus musculus asteroid homolog 1 (Drosophila) (Aste1), mRNA,	AV006403; 1100001A21Rik; MGC107393
ILMN_1254256	Actl6a	377.36	265.376	1341	754.965	441.945	279.662	0.703244	0.562988	1	0.632798	Mus musculus actin-like 6A (Actl6a), mRNA,	Actl6; C79802; Baf53a; ARP4; 2810432C06Rik; AI851094
ILMN_2601118	Atpaf2	386.265	344.713	437.08	374.226	328.204	207.977	0.892426	0.856195	1	0.633683	Mus musculus ATP synthase mitochondrial F1 complex assembly factor 2 (Atpaf2), nuclear gene encoding mitochondrial protein, mRNA,	ATP12p; ATP12
ILMN_2619846	Slc25a1	71.8469	63.7562	130.24	119.793	79.1033	50.1334	0.88739	0.919785	1	0.633771	Mus musculus solute carrier family 25 (mitochondrial carrier, citrate transporter), member 1 (Slc25a1), nuclear gene encoding mitochondrial protein, mRNA,	MGC47055; Dgsj; 1300019P08Rik; AI194714; Slc20a3; Ctp; 2610100G11Rik
ILMN_2803344	Tmem143	91.6623	70.8265	82.5736	54.7331	107.382	68.0564	0.772689	0.66284	1	0.633776	Mus musculus transmembrane protein 143 (Tmem143), mRNA,	2310076O21Rik; AI481604
ILMN_1240323	Dnajb1	729.02	689.132	1216.41	1716.4	945.272	599.161	0.945285	1.41103	1	0.63385	Mus musculus DnaJ (Hsp40) homolog, subfamily B, member 1 (Dnajb1), mRNA,	0610007I11Rik; Hsp40; HSPF1
ILMN_2700505	Tmem43	161.32	130.076	338.114	272.205	194.573	123.373	0.806321	0.805068	1	0.634068	Mus musculus transmembrane protein 43 (Tmem43), mRNA,	1200015A22Rik
ILMN_3163504	Mettl4	109.913	89.6896	188.333	173.799	118.123	74.9324	0.816005	0.922826	1	0.634357	Mus musculus methyltransferase like 4 (Mettl4), mRNA,	A730091E08Rik; AV296509; HsT661; 2410198H06Rik
ILMN_2740222	Zfp644	120.859	118.741	315.396	289.963	139.812	88.7381	0.982482	0.919363	1	0.634695	Mus musculus zinc finger protein 644 (Zfp644), mRNA,	BM-005; AA408882; D5Ertd689e; Zep-2; 1110068L01Rik
ILMN_2729458	Idh1	60.9772	76.8093	194.508	319.089	134.504	85.3855	1.25964	1.64049	1	0.634816	Mus musculus isocitrate dehydrogenase 1 (NADP+), soluble (Idh1), mRNA,	Idh-1; E030024J03Rik; MGC115782; AI788952; IDPc; AI314845; Id-1
ILMN_1247317	Cct3	909.757	543.511	2816.47	2044.32	1347.24	855.272	0.597425	0.725845	1	0.634833	Mus musculus chaperonin containing Tcp1, subunit 3 (gamma) (Cct3), mRNA,	AL024092; Cctg; Tcp1-rs3; TriC-P5
ILMN_2780420	Rnf26	52.3607	41.9494	52.0057	41.6202	56.4336	35.8367	0.801162	0.8003	1	0.635025	Mus musculus ring finger protein 26 (Rnf26), mRNA,	8030450I18Rik
ILMN_2676127	Scarf2	24.0295	24.7032	39.7669	37.9783	32.3055	20.5165	1.02804	0.955023	1	0.635079	Mus musculus scavenger receptor class F, member 2 (Scarf2), mRNA,	W53987; SRECRP-1; Scatf1; Scarf1; SrecII; SREC-II; W65560; NSR1; AI194363; Srec2
ILMN_2675595	Tmem143	33.8031	31.6018	49.5472	30.9405	45.206	28.7119	0.934877	0.624466	1	0.635135	Mus musculus transmembrane protein 143 (Tmem143), mRNA,	2310076O21Rik; AI481604
ILMN_3154869	Ctdspl2	34.45	37.6725	65.1713	60.3505	46.9765	29.8399	1.09354	0.926029	1	0.635209	Mus musculus CTD (carboxy-terminal domain, RNA polymerase II, polypeptide A) small phosphatase like 2 (Ctdspl2), mRNA,	D2Ertd485e
ILMN_3162771	Taf1d	265.2	274.33	408.457	232.596	215.912	137.176	1.03443	0.569452	1	0.635333	Mus musculus TATA box binding protein (Tbp)-associated factor, RNA polymerase I, D (Taf1d), transcript variant 2, mRNA,	4930553M18Rik; MGC117821; 5930426I11Rik; 2810003M17Rik
ILMN_2771686	Ppil2	85.3995	99.8673	89.1361	105.212	78.067	49.6014	1.16941	1.18036	1	0.635369	Mus musculus peptidylprolyl isomerase (cyclophilin)-like 2 (Ppil2), mRNA,	4930511F14Rik; AA589416; 4921520K19Rik; 1700016N17Rik; C130078A06Rik; 0610009L05Rik
ILMN_1243528	Dmrta2	301.548	248.372	336.031	512.241	455.572	289.476	0.823655	1.52439	1	0.635412	Mus musculus doublesex and mab-3 related transcription factor like family A2 (Dmrta2), mRNA,	Dmrt5
ILMN_2742599	Nfix	519.428	554.406	499.91	331.184	329.615	209.497	1.06734	0.662487	1	0.63558	Mus musculus nuclear factor I/X (Nfix), transcript variant 2, mRNA, XM_921228 XM_921240 XM_921250 XM_921261 XM_921270 XM_921288 XM_921293 XM_921299 XM_921300 XM_921307
ILMN_2917338	Rnf125	93.1848	37.2696	157.29	56.9404	66.3958	42.2065	0.399953	0.36201	1	0.63568	Mus musculus ring finger protein 125 (Rnf125), mRNA,	4930553F04Rik
ILMN_1231371	Elof1	727.839	492.426	705.765	461.109	587.766	373.817	0.676559	0.653347	1	0.635996	Mus musculus elongation factor 1 homolog (ELF1, S, cerevisiae) (Elof1), mRNA,	1110011K10Rik
ILMN_2881480	Vamp3	290.614	234.032	575.55	739.023	384.701	244.7	0.805302	1.28403	1	0.636078	Mus musculus vesicle-associated membrane protein 3 (Vamp3), mRNA,	ceb; VAMP-3; D130027G05Rik
ILMN_2892215	Gm71	87.8275	48.8869	174.757	86.0608	99.1918	63.1083	0.556624	0.492459	1	0.636226	Mus musculus gene model 71, (NCBI) (Gm71), mRNA,
ILMN_2842859	Cdk5rap2	124.436	82.5166	94.4398	75.5693	88.9721	56.6205	0.663122	0.800185	1	0.636385	Mus musculus CDK5 regulatory subunit associated protein 2 (Cdk5rap2), mRNA,	MGC38528; 2900018K03Rik; mKIAA1633
ILMN_2831283	Tmem43	113.794	102.124	245.185	188.402	150.169	95.5734	0.897447	0.768407	1	0.636439	Mus musculus transmembrane protein 43 (Tmem43), mRNA,	1200015A22Rik
ILMN_3006123	Asns	457.706	285.429	511.012	366.05	365.054	232.492	0.623609	0.716322	1	0.636869	Mus musculus asparagine synthetase (Asns), mRNA,
ILMN_2644992	Rfxap	343.559	377.129	368.266	453.332	343.381	218.701	1.09771	1.23099	1	0.636903	Mus musculus regulatory factor X-associated protein (Rfxap), mRNA,	5730495K23Rik
ILMN_2755621	Zfp653	139.444	162.605	72.8748	54.6215	117.053	74.5612	1.1661	0.749526	1	0.636986	Mus musculus zinc finger protein 653 (Zfp653), mRNA,	E430039K05Rik
ILMN_2439341	Vars	1371.16	968.073	1625.69	995.119	1244.23	793.052	0.706026	0.612121	1	0.637382	Mus musculus valyl-tRNA synthetase (Vars), nuclear gene encoding mitochondrial protein, mRNA,	Bat6; G7a; D17H6S56E; Vars2; Bat-6
ILMN_3014965	2610507B11Rik	1166.31	1332.96	1282.68	1368.81	877.843	559.822	1.14289	1.06715	1	0.637724	Mus musculus RIKEN cDNA 2610507B11 gene (2610507B11Rik), mRNA,	AU022687; D11Bhm178e; E1; D11Bhm179e; mKIAA0100; KIAA0100; RP23-185A18,9
ILMN_2877909	Smg5	54.1023	55.7347	53.8305	43.7956	43.4105	27.6852	1.03017	0.813583	1	0.637753	Mus musculus Smg-5 homolog, nonsense mediated mRNA decay factor (C, elegans) (Smg5), mRNA,	mKIAA1089; BC024683; MGC56792; MGC30464; MGC118167
ILMN_2623776	Eps8	46.9434	33.2689	55.64	31.6518	85.968	54.8347	0.708702	0.568867	1	0.63785	Mus musculus epidermal growth factor receptor pathway substrate 8 (Eps8), mRNA,	AW261790
ILMN_2660267	Dnm1l	74.1784	72.5104	223.792	218.616	107.34	68.4677	0.977514	0.976874	1	0.63786
ILMN_3046836	Suclg2	43.5589	37.2687	145.085	172.688	96.7271	61.7016	0.855593	1.19025	1	0.637893	Mus musculus succinate-Coenzyme A ligase, GDP-forming, beta subunit (Suclg2), mRNA,	D6Wsu120e; MGC91183; AF171077; AW556404
ILMN_2751054	Atf2	39.7927	52.0613	76.9317	68.0089	47.1085	30.0512	1.30831	0.884017	1	0.637915
ILMN_1258993	Mrps35	517.265	314.496	653.529	380.039	390.721	249.407	0.607998	0.581519	1	0.638326	Mus musculus mitochondrial ribosomal protein S35 (Mrps35), nuclear gene encoding mitochondrial protein, mRNA,	MGC28446; MRPS28; MRP-S28; MDSO23
ILMN_1228568	Irf2bp1	248.473	332.68	435.624	597.605	305.748	195.314	1.3389	1.37184	1	0.638807	Mus musculus interferon regulatory factor 2 binding protein 1 (Irf2bp1), mRNA,	C530033F24; 6330414O09Rik
ILMN_2918927	Dusp3	47.9251	42.0145	48.1329	47.3981	38.529	24.631	0.87667	0.984734	1	0.639285	Mus musculus dual specificity phosphatase 3 (vaccinia virus phosphatase VH1-related) (Dusp3), mRNA,	VHR; 2210015O03Rik; T-DSP11; 5031436O03Rik
ILMN_2994631	C230052I12Rik	136.415	47.6035	209.981	52.9086	110.286	70.5792	0.34896	0.251969	1	0.639968	Mus musculus RIKEN cDNA C230052I12 gene (C230052I12Rik), mRNA,	AW538696; AW124591
ILMN_1223348	Gemin4	52.9679	41.2402	93.0443	59.0681	73.5997	47.1084	0.778588	0.634838	1	0.640062	Mus musculus gem (nuclear organelle) associated protein 4 (Gemin4), mRNA,	AU015359; MGC28146; 4932415L08Rik
ILMN_2805829	Exosc2	883.257	612.669	1474.56	599.73	658.378	421.485	0.693648	0.406719	1	0.640186	Mus musculus exosome component 2 (Exosc2), mRNA,	MGC30456; Rrp4
ILMN_1231035	Csnk1d	604.485	512.553	1413.27	1025.08	740.933	474.461	0.847917	0.725324	1	0.640356	Mus musculus casein kinase 1, delta (Csnk1d), transcript variant 2, mRNA,	D930010H05Rik; 1200006A05Rik; AA409348
ILMN_3163403	Ate1	47.1284	53.7615	65.9197	70.7176	42.3559	27.1286	1.14075	1.07278	1	0.640493	Mus musculus arginyltransferase 1 (Ate1), transcript variant 3, mRNA,	AI225793; AW547406
ILMN_2650868	Ino80c	65.9651	40.4277	172.268	163.997	77.6411	49.7462	0.612865	0.95199	1	0.640719	Mus musculus INO80 complex subunit C (Ino80c), mRNA,
ILMN_2768805	Pkn2	323.269	363.448	548.285	506.514	282.675	181.128	1.12429	0.923815	1	0.640763	Mus musculus protein kinase N2 (Pkn2), mRNA,	6030436C20Rik; Prkcl2; Stk7; AI507382; PRK2
ILMN_3001076	Setd8	435.838	321.539	414.321	177.287	347.67	222.788	0.737749	0.427898	1	0.640804	Mus musculus SET domain containing (lysine methyltransferase) 8 (Setd8), mRNA,	AW536475; 2410195B05Rik; AA617402; MGC117832
ILMN_1244330	Jtv1	511.804	349.464	678.566	398.735	449.139	287.834	0.682808	0.587614	1	0.640858	Mus musculus JTV1 gene (Jtv1), mRNA,	MGC36346; MGC36522; AA407225; MGC37389; AA407136; MGC30261
ILMN_3118169	Jmjd1a	94.0832	171.783	210.057	352.443	267.046	171.192	1.82586	1.67785	1	0.641056	Mus musculus jumonji domain containing 1A (Jmjd1a), transcript variant 1, mRNA, XM_895834 XM_895843 XM_895849 XM_895856 XM_895859 XM_895866 XM_895873 XM_909665 XM_921390 XM_921393 XM_921399 XM_921405 XM_921412 XM_921421 XM_921426 XM_921433 XM_921440 XM_921445 XM_921451	Jmjd1; Tsga; 1700105C21Rik; TGSA; C230043E16Rik; mKIAA0742
ILMN_1227401	Baz1a	93.3471	82.6825	270.884	175.091	194.947	124.985	0.885754	0.64637	1	0.641121	PREDICTED: Mus musculus bromodomain adjacent to zinc finger domain 1A (Baz1a), mRNA,
ILMN_1237651	Ipp	100.332	107.778	189.291	248.668	104.247	66.8493	1.07422	1.31368	1	0.641261	Mus musculus IAP promoted placental gene (Ipp), mRNA,	Mipp; D4Jhu8
ILMN_2987207	Zfp382	36.0308	35.9719	58.9045	36.0139	40.2839	25.8386	0.998364	0.611396	1	0.641412	Mus musculus zinc finger protein 382 (Zfp382), mRNA,	Znf382; 5930415A09Rik
ILMN_3127375	Otub1	115.3	127.199	121.148	148.121	83.2196	53.3788	1.10321	1.22265	1	0.641421	Mus musculus OTU domain, ubiquitin aldehyde binding 1 (Otub1), mRNA,	AI850305
ILMN_1248184	Senp1	178.249	124.695	110.202	56.6906	86.9319	55.7623	0.699553	0.514424	1	0.641448	Mus musculus SUMO1/sentrin specific peptidase 1 (Senp1), mRNA,	E330036L07Rik; D15Ertd528e; 2310046A20Rik; MGC27975
ILMN_1259619	Ascc2	30.1509	26.4281	42.1452	38.7123	32.6053	20.9152	0.876531	0.918546	1	0.641466	Mus musculus activating signal cointegrator 1 complex subunit 2 (Ascc2), mRNA,	ASC1p100; 2610034L15Rik; RP23-280J3,3; AI482016; AW046480; 1700011I11Rik; FLJ21588
ILMN_2670398	Eif4ebp1	1564.5	1104.07	1788.57	1323.54	1384.38	888.282	0.705704	0.739999	1	0.641647	Mus musculus eukaryotic translation initiation factor 4E binding protein 1 (Eif4ebp1), mRNA,	PHAS-I; AA959816
ILMN_1216308	Zfp574	238.49	299.984	566.27	620.506	258.356	165.815	1.25785	1.09578	1	0.64181	Mus musculus zinc finger protein 574 (Zfp574), mRNA,	A630056B21Rik
ILMN_1245761	Nsun5	76.2589	50.9016	275.353	123.305	116.17	74.5606	0.667484	0.447807	1	0.641821	Mus musculus NOL1/NOP2/Sun domain family, member 5 (Nsun5), mRNA,	Wbscr20; AI326939; Nol1r; 9830109N13Rik; Wbscr20a
ILMN_2888375	6230427J02Rik	142.762	67.468	137.552	64.3459	102.119	65.5438	0.472591	0.467793	1	0.641835	Mus musculus RIKEN cDNA 6230427J02 gene (6230427J02Rik), mRNA,
ILMN_2907066	Thap1	58.0362	46.3596	76.7698	49.746	49.6671	31.8858	0.798804	0.64799	1	0.641989	Mus musculus THAP domain containing, apoptosis associated protein 1 (Thap1), mRNA,	4833431A01Rik
ILMN_2733524	Nrm	628.312	790.608	1320.1	2009.5	1057.53	679.026	1.2583	1.52224	1	0.642084	Mus musculus nurim (nuclear envelope membrane protein) (Nrm), mRNA,	AI429796
ILMN_2968807	Rpain	307.073	254.871	288.26	271.662	337.88	217.012	0.830002	0.94242	1	0.642275	Mus musculus RPA interacting protein (Rpain), mRNA,	RP23-83I13,5; 2400006N03Rik
ILMN_2707895	Jmjd1a	205.962	327.695	404.54	524.714	447.455	287.412	1.59104	1.29706	1	0.642327	Mus musculus jumonji domain containing 1A (Jmjd1a), transcript variant 1, mRNA, XM_895834 XM_895843 XM_895849 XM_895856 XM_895859 XM_895866 XM_895873 XM_909665 XM_921390 XM_921393 XM_921399 XM_921405 XM_921412 XM_921421 XM_921426 XM_921433 XM_921440 XM_921445 XM_921451	Jmjd1; Tsga; 1700105C21Rik; TGSA; C230043E16Rik; mKIAA0742
ILMN_3000298	BC053749	89.6366	111.162	59.2877	61.437	71.7081	46.0696	1.24014	1.03625	1	0.64246	Mus musculus cDNA sequence BC053749 (BC053749), mRNA,	MGC59495
ILMN_1215167	Ddx5	66.3147	90.3179	414.761	542.325	248.971	159.99	1.36196	1.30756	1	0.642607	Mus musculus DEAD (Asp-Glu-Ala-Asp) box polypeptide 5 (Ddx5), mRNA,	2600009A06Rik; HUMP68; Hlr1; p68; MGC118083; G17P1
ILMN_2607160	Pum2	325.982	210.2	625.973	479.468	266.536	171.306	0.644822	0.765956	1	0.642711	Mus musculus pumilio 2 (Drosophila) (Pum2), mRNA, XM_919820 XM_919830 XM_919843 XM_919849	Pumm2; mKIAA0235; 5730503J23Rik
ILMN_2688721	5830468K18Rik	192.179	165.402	378.879	179.051	210.169	135.096	0.860668	0.47258	1	0.642797
ILMN_2603953	Stip1	1793.5	1467.05	1767.63	1379.06	1191.12	765.949	0.817983	0.780178	1	0.643049	Mus musculus stress-induced phosphoprotein 1 (Stip1), mRNA,	Hop; STI1; p60; mSTI1
ILMN_2877069	Tspo	1045.17	654.018	983.949	1150.54	1330.3	855.488	0.625752	1.16931	1	0.643078	Mus musculus translocator protein (Tspo), mRNA,	IBP; PBR; Bzrp
ILMN_2626653	Fxc1	449.112	298.548	188.219	148.03	356.645	229.569	0.664751	0.786477	1	0.643691	Mus musculus fractured callus expressed transcript 1 (Fxc1), mRNA,	Tim10b; Timm10b; Tim9b
ILMN_2420366	Zrsr2	91.1748	75.6835	184.66	150.661	89.0245	57.3071	0.830092	0.815885	1	0.643723	Mus musculus zinc finger (CCCH type), RNA binding motif and serine/arginine rich 2 (Zrsr2), transcript variant 2, mRNA,	C77286; U2af1-rs2; A230052C13Rik; 35kDa; 5031411E02Rik
ILMN_2932964	Ctps	814.517	560.243	1612.53	737.962	738.218	475.215	0.687822	0.457643	1	0.643733	Mus musculus cytidine 5'-triphosphate synthase (Ctps), mRNA,
ILMN_3102736	Gm129	74.7267	100.145	70.7173	52.6383	132.524	85.3224	1.34015	0.744349	1	0.643828	Mus musculus gene model 129, (NCBI) (Gm129), mRNA, XM_907670 XM_920513 XM_920520 XM_920527 XM_920533
ILMN_2492716	Uaca	29.5275	22.3673	31.6274	24.3189	38.2738	24.6455	0.757506	0.76892	1	0.643927	Mus musculus uveal autoantigen with coiled-coil domains and ankyrin repeats (Uaca), mRNA,	2700059D02Rik; nucling
ILMN_3036678	Adarb1	89.5552	44.2342	75.6712	39.9356	68.9667	44.4202	0.493933	0.527751	1	0.644081	Mus musculus adenosine deaminase, RNA-specific, B1 (Adarb1), transcript variant 3, mRNA,	1700057H01Rik; D10Bwg0447e; AW558573; ADAR2; AW124433; BB220382; RED1
ILMN_2648973	Ctcf	280.334	234.73	723.394	698.549	327.789	211.134	0.83732	0.965655	1	0.644115	Mus musculus CCCTC-binding factor (Ctcf), mRNA,	AW108038
ILMN_2760116	LOC100048046	867.699	563.429	631.011	445.522	568.823	366.478	0.649336	0.706044	1	0.644274	PREDICTED: Mus musculus similar to SRp25 nuclear protein, transcript variant 1 (LOC100048046), mRNA,
ILMN_2754355	Rps19	100.977	47.1938	75.8064	38.6908	80.5524	51.9158	0.467374	0.510389	1	0.644497	Mus musculus ribosomal protein S19 (Rps19), mRNA,	MGC107694
ILMN_1254813	Umps	107.039	70.6065	325.061	127.945	126.68	81.6943	0.659635	0.393604	1	0.64489	Mus musculus uridine monophosphate synthetase (Umps), mRNA,	1700095D23Rik; AA408257; BB164745; AL033308
ILMN_1230883	Pwp2	33.6037	28.3468	46.4574	31.0122	34.0398	21.9531	0.843562	0.66754	1	0.644924	Mus musculus PWP2 periodic tryptophan protein homolog (yeast) (Pwp2), mRNA,	6530411D08Rik; Pwp2h; MGC117973; wdp103
ILMN_2620492	Tcerg1	107.106	94.3008	122.207	77.616	53.2172	34.3303	0.880446	0.635122	1	0.645097	Mus musculus transcription elongation regulator 1 (CA150) (Tcerg1), mRNA,	ca150; Taf2s; AI428505; FBP 23; 2900090C16Rik; p144; 2410022J09Rik; CA150b
ILMN_2836023	Stra13	62.6983	47.0964	46.1284	38.6309	72.7291	46.9193	0.751159	0.837465	1	0.645125	Mus musculus stimulated by retinoic acid 13 (Stra13), mRNA,
ILMN_2612774	Agfg2	339.905	624.543	621.82	763.983	363.556	234.56	1.8374	1.22862	1	0.645184	Mus musculus ArfGAP with FG repeats 2 (Agfg2), transcript variant 2, mRNA,	RABR; MGC7148; A630095P14Rik; MGC61203
ILMN_2734045	Mrpl14	710.269	700.278	375.352	416.399	564.092	363.961	0.985934	1.10935	1	0.645215	Mus musculus mitochondrial ribosomal protein L14 (Mrpl14), nuclear gene encoding mitochondrial protein, mRNA,	Rpml32; 1110006I11Rik; AI846816; MRP-L32
ILMN_1224942	Shmt2	391.736	220.743	542.173	274.901	491.668	317.244	0.563499	0.507035	1	0.64524	Mus musculus serine hydroxymethyltransferase 2 (mitochondrial) (Shmt2), nuclear gene encoding mitochondrial protein, mRNA,	2700043D08Rik; AA408223; AA986903
ILMN_3155217	Cdc6	28.2191	24.932	35.4754	23.8957	26.5397	17.1259	0.883514	0.673586	1	0.645293	Mus musculus cell division cycle 6 homolog (S, cerevisiae) (Cdc6), transcript variant 1, mRNA,	CDC18L
ILMN_2898917	Otub2	110.195	49.7276	117.031	62.9834	107.862	69.6378	0.451268	0.538178	1	0.645619	Mus musculus OTU domain, ubiquitin aldehyde binding 2 (Otub2), mRNA,	OTB2; AI413508; AW557219; 2010015L18Rik; OTU2; 4930586I02Rik
ILMN_2703886	Mphosph6	266.725	190.21	547.176	349.121	344.884	222.762	0.713131	0.638041	1	0.645903	Mus musculus M phase phosphoprotein 6 (Mphosph6), mRNA,	1110001M01Rik; AA536809; C86426
ILMN_2673601	Pcgf3	63.9797	85.7662	82.5032	81.4551	58.2409	37.6193	1.34052	0.987297	1	0.645925	Mus musculus polycomb group ring finger 3 (Pcgf3), mRNA,	AI662857; E430039C14; Rnf3; D630042K08Rik; RNF3A; 2310035N15Rik; DONG1
ILMN_1259798	Aprin	252.006	203.786	682.538	502.659	356.047	230.014	0.808654	0.736456	1	0.646021	Mus musculus androgen-induced proliferation inhibitor (Aprin), mRNA,	AW212954; AS3; mKIAA0979; AI646570
ILMN_2712697	Pacsin2	30.6338	28.9461	45.4423	36.4834	35.4506	22.903	0.944907	0.802851	1	0.646054	Mus musculus protein kinase C and casein kinase substrate in neurons 2 (Pacsin2), mRNA,	AI197433
ILMN_2482756	Usf2	73.3119	53.5483	72.4514	72.9359	82.8615	53.5444	0.730417	1.00669	1	0.646192	Mus musculus upstream transcription factor 2 (Usf2), mRNA,	Usf-2; MGC91056
ILMN_2722778	Cpsf4	67.6353	64.4767	110.229	73.8481	74.1661	47.9322	0.953299	0.669953	1	0.646282	Mus musculus cleavage and polyadenylation specific factor 4 (Cpsf4), mRNA,	MGC36996; 30kDa; C79664
ILMN_2694038	Pcyt2	258.56	456.261	342.7	365.135	299.456	193.605	1.76462	1.06547	1	0.646523	Mus musculus phosphate cytidylyltransferase 2, ethanolamine (Pcyt2), mRNA,	ET; 1110033E03Rik
ILMN_1221102	Arl5a	225.834	145.148	404.647	365.106	395.334	255.685	0.642719	0.902285	1	0.646758	Mus musculus ADP-ribosylation factor-like 5A (Arl5a), mRNA,	T25534; AW610751; 2410015N24Rik; Arl5; 2810410P22Rik; AA408731
ILMN_2752618	Slc35e1	217.369	168.075	490.546	350.917	247.35	160.012	0.773223	0.715359	1	0.646908	Mus musculus solute carrier family 35, member E1 (Slc35e1), mRNA,	6030458H05; AA408278
ILMN_2615207	Dci	635.898	669.679	679.622	822.183	696.127	450.34	1.05312	1.20976	1	0.646923	Mus musculus dodecenoyl-Coenzyme A delta isomerase (3,2 trans-enoyl-Coenyme A isomerase) (Dci), nuclear gene encoding mitochondrial protein, mRNA,	eci
ILMN_2684494	Raly	918.074	924.515	1258.53	1577.17	1106.37	715.808	1.00702	1.25319	1	0.646989	Mus musculus hnRNP-associated with lethal yellow (Raly), mRNA,	AI663842; Merc
ILMN_3121784	A930008G19Rik	118.213	86.3417	57.5658	43.7813	108.706	70.3437	0.730392	0.760544	1	0.647102	Mus musculus RIKEN cDNA A930008G19 gene (A930008G19Rik), mRNA,	mKIAA0140; MGC40647
ILMN_2624695	Chchd4	513.166	230.4	838.88	390.245	507.057	328.132	0.448978	0.465198	1	0.647131	Mus musculus coiled-coil-helix-coiled-coil-helix domain containing 4 (Chchd4), nuclear gene encoding mitochondrial protein, mRNA,	2810014D17Rik; 2410012P20Rik; AI838740
ILMN_2803399	Mcm6	1245.99	617.23	3092.54	901.02	927.051	600.009	0.495375	0.291353	1	0.647224	Mus musculus minichromosome maintenance deficient 6 (MIS5 homolog, S, pombe) (S, cerevisiae) (Mcm6), mRNA,	ASP-l1; Mcmd6; D1Wsu22e
ILMN_2754369	Exosc8	577.667	432.874	1357.94	781.358	743.962	481.593	0.749349	0.575398	1	0.647336	Mus musculus exosome component 8 (Exosc8), mRNA,	2310032N20Rik; CIP3; KIAA4013; mKIAA4013
ILMN_2739843	Metrn	538.864	409.008	473.118	296.331	366.292	237.119	0.759019	0.626337	1	0.64735
ILMN_2600508	Eif2b1	282.316	168.767	637.96	412.454	422.909	273.773	0.597795	0.646519	1	0.647356
ILMN_2665959	Rnf168	71.504	64.6379	128.707	102.381	132.375	85.7555	0.903976	0.795457	1	0.647823	Mus musculus ring fnger protein 168 (Rnf168), mRNA,	3110001H15Rik
ILMN_2843349	C79407	76.0056	56.2134	194.375	79.3985	94.679	61.3409	0.739596	0.408481	1	0.647883	Mus musculus expressed sequence C79407 (C79407), mRNA,	6720403H11; KIAA1903; mKIAA1903
ILMN_2752754	Mcph1	69.6812	69.6899	65.6146	46.8402	61.1497	39.6237	1.00013	0.713867	1	0.647979	Mus musculus microcephaly, primary autosomal recessive 1 (Mcph1), mRNA,	MCT; D030046N04Rik; BRIT1; 5430437K10Rik; MGC66518
ILMN_2662160	Impa2	173.56	77.4296	237.128	75.0342	193.934	125.667	0.446127	0.316429	1	0.647988	Mus musculus inositol (myo)-1(or 4)-monophosphatase 2 (Impa2), mRNA,	AI326924; AW259601; 2210415D20Rik
ILMN_2450215	Arfgap2	70.6703	60.481	97.1953	135.677	67.5238	43.7694	0.85582	1.39592	1	0.648207	Mus musculus ADP-ribosylation factor GTPase activating protein 2 (Arfgap2), mRNA,	2310032E02Rik
ILMN_1225374	Arsb	264.809	144.387	448.875	306.53	259.768	168.405	0.545249	0.682884	1	0.648293	Mus musculus arylsulfatase B (Arsb), mRNA,	As-1r; Asr-1; As-1t; As1-r; 1110007C02Rik; As1-s; As-1; As1-t; As-1s; Ast-1; As1; AI480648
ILMN_2968731	Nqo2	105.557	65.4804	123.489	124.739	91.5846	59.3809	0.62033	1.01013	1	0.648372	Mus musculus NAD(P)H dehydrogenase, quinone 2 (Nqo2), mRNA,	Nmor2; Ox2; NMO2; Ox-2
ILMN_3103575	Ankrd6	151.515	74.7503	225.672	103.078	223.368	144.828	0.493352	0.456762	1	0.648382	Mus musculus ankyrin repeat domain 6 (Ankrd6), transcript variant 3, mRNA,
ILMN_3131063	Ccnd3	653.675	358.501	757.162	545.535	517.138	335.413	0.548439	0.7205	1	0.648595	Mus musculus cyclin D3 (Ccnd3), transcript variant 1, mRNA,	AA682053; AW146355; 9230106B05Rik; AL024085; C78795
ILMN_3007680	Mpp6	301.258	185.157	697.292	367.596	316.99	205.6	0.614613	0.527177	1	0.6486	Mus musculus membrane protein, palmitoylated 6 (MAGUK p55 subfamily member 6) (Mpp6), mRNA,	Pals2; P55t
ILMN_2513895	Sae1	39.8219	32.8242	135.783	82.6238	62.3417	40.4373	0.824276	0.608497	1	0.648639	Mus musculus SUMO1 activating enzyme subunit 1 (Sae1), mRNA,	2400010M20Rik; Uble1a; AW743391; AOS1; AL033372; 2610044L12Rik; D7Ertd177e; HSPC140; Sua1
ILMN_1225988	Zdhhc3	79.0425	67.0344	143.778	80.5272	75.272	48.8278	0.848081	0.560082	1	0.648685	Mus musculus zinc finger, DHHC domain containing 3 (Zdhhc3), mRNA,	1110020O22Rik; 1810006O10Rik; 2210017C02Rik; Zfp373; Gramp1; GODZ
ILMN_2682778	Rassf7	29.5743	29.3506	29.9008	31.3778	33.657	21.8357	0.992435	1.0494	1	0.648772	Mus musculus Ras association (RalGDS/AF-6) domain family (N-terminal) member 7 (Rassf7), mRNA,	2400009B11Rik; AW210608
ILMN_2926068	Prr11	35.3859	33.6753	46.3779	49.6395	46.3569	30.0846	0.951659	1.07033	1	0.648979	Mus musculus proline rich 11 (Prr11), mRNA,	B930067F20Rik; RP23-352L3,4
ILMN_2881024	1700040I03Rik	94.119	66.8739	107.933	97.2087	118.993	77.2332	0.710525	0.900641	1	0.649056	Mus musculus RIKEN cDNA 1700040I03 gene (1700040I03Rik), mRNA, XM_923066 XM_978905 XM_981332 XM_981367 XM_981402 XM_990015 XM_991725
ILMN_2997796	2410014A08Rik	43.9531	46.5795	131.831	103.537	72.3656	46.9751	1.05975	0.785375	1	0.649136	Mus musculus RIKEN cDNA 2410014A08 gene (2410014A08Rik), mRNA,	mKIAA0152; AI850530; ESTM19; X83352
ILMN_1248132	Stmn1	330.445	251.189	750.267	468.797	602.986	391.622	0.760153	0.62484	1	0.649472
ILMN_2810047	Iars	499.208	286.884	783.906	463.805	505.432	328.267	0.574679	0.591659	1	0.649479	Mus musculus isoleucine-tRNA synthetase (Iars), mRNA,	2510016L12Rik; E430001P04Rik; ILRS; AI327140; AU044614
ILMN_1215681	Calm3	1763.87	963.617	2726.2	2201.08	2201.25	1430.07	0.546308	0.807382	1	0.64966	Mus musculus calmodulin 3 (Calm3), mRNA,	R75142; CaMA
ILMN_2641270	Fam149b	62.9708	52.7279	116.237	139.802	90.4975	58.8128	0.837339	1.20273	1	0.649883	Mus musculus family with sequence similarity 149, member B (Fam149b), transcript variant 1, mRNA,	mKIAA0974; MGC32264
ILMN_3099242	Chka	31.158	35.6358	49.086	62.4804	38.5211	25.0355	1.14371	1.27288	1	0.649917	Mus musculus choline kinase alpha (Chka), transcript variant 2, mRNA,	Chetk-alpha; ChoK; EtnK-alpha; Chk
ILMN_2707127	Nubp1	1383.76	1288.06	2262	2121.49	1045.44	679.911	0.930835	0.937884	1	0.650361	Mus musculus nucleotide binding protein 1 (Nubp1), mRNA,
ILMN_1214671	Cdca4	909.5	595.885	1945.26	1174.66	1294.68	842.172	0.655178	0.603858	1	0.650487	Mus musculus cell division cycle associated 4 (Cdca4), mRNA,	SEI-3; 2410018C03Rik; HEPP
ILMN_2742667	C1galt1	50.8387	67.9487	70.7466	85.9146	73.8168	48.0201	1.33656	1.2144	1	0.650531	Mus musculus core 1 synthase, glycoprotein-N-acetylgalactosamine 3-beta-galactosyltransferase, 1 (C1galt1), mRNA,	2210410E06Rik; T-synthase; AV284120
ILMN_1225077	Mical1	155.449	104.469	73.1737	63.4338	94.5631	61.5233	0.67205	0.866893	1	0.650606	Mus musculus microtubule associated monoxygenase, calponin and LIM domain containing 1 (Mical1), mRNA,	Nical; MGC27831; MGC38321; MICAL
ILMN_3041258	C530028I08Rik	37.1824	36.3052	51.2301	52.9247	48.5535	31.5902	0.976409	1.03308	1	0.650627	Mus musculus RIKEN cDNA C530028I08 gene (C530028I08Rik), mRNA,	Gm159
ILMN_3123970	Stag2	319.271	299.404	1091.9	1126.16	445.244	289.776	0.937776	1.03138	1	0.650825	Mus musculus stromal antigen 2 (Stag2), transcript variant 2, mRNA,	SAP2; SA-2; B230112I07Rik; 9230105L23Rik
ILMN_1259185	C030048B08Rik	85.0871	90.147	201.886	154.933	135.006	87.8652	1.05947	0.767429	1	0.650825	Mus musculus RIKEN cDNA C030048B08 gene (C030048B08Rik), mRNA,	AW548102
ILMN_1226422	Uchl5	550.844	265.357	1587.01	646.449	856.807	557.637	0.481728	0.407338	1	0.650831	Mus musculus ubiquitin carboxyl-terminal esterase L5 (Uchl5), mRNA,	Uch37; 5830413B11Rik
ILMN_3163148	Ddhd1	54.6174	83.1505	63.155	65.7551	69.0862	44.9775	1.52242	1.04117	1	0.651035	Mus musculus DDHD domain containing 1 (Ddhd1), transcript variant 1, mRNA,	C85251; 9630061G18Rik; mKIAA1705; 4921528E07Rik
ILMN_2499888	Zzz3	31.7385	34.4447	65.6838	61.3034	44.1677	28.7587	1.08527	0.933311	1	0.651126	Mus musculus zinc finger, ZZ domain containing 3 (Zzz3), transcript variant 1, mRNA,	AW556059; 6430567E01Rik; AI481057; R75514; AA408566; 3110065C23Rik
ILMN_1214353	Ifrd1	26.5428	27.8669	58.6418	47.9585	37.4238	24.3798	1.04988	0.817821	1	0.651451	Mus musculus interferon-related developmental regulator 1 (Ifrd1), mRNA,	Ifnl; PC4; Tis7
ILMN_3005441	Ppa1	3204.25	1858.96	7061.75	3165.72	2350.89	1531.71	0.580153	0.448292	1	0.651547	Mus musculus pyrophosphatase (inorganic) 1 (Ppa1), mRNA,	2010317E03Rik; Pyp
ILMN_1247811	Ass1	611.505	192.468	775.571	180.393	436.735	284.7	0.314745	0.232594	1	0.651884	Mus musculus argininosuccinate synthetase 1 (Ass1), mRNA,	AA408052; Ass-1; ASS; MGC103151
ILMN_2677408	Hrmt1l2	4486.13	3040.14	6116.23	3811.16	3174.13	2069.24	0.677675	0.623122	1	0.651909
ILMN_1235909	Ak2	621.786	431.094	1603.87	991.05	923.643	602.202	0.693315	0.617912	1	0.651986	Mus musculus adenylate kinase 2 (Ak2), transcript variant 2, mRNA,	D4Ertd220e; Ak-2
ILMN_2776681	Dusp28	57.3147	62.3628	98.5603	127.094	71.6571	46.7323	1.08808	1.2895	1	0.652166	Mus musculus dual specificity phosphatase 28 (Dusp28), mRNA,	AV005521; 0710001B24Rik
ILMN_1221838	1110049F12Rik	52.6248	51.6362	132.391	125.631	71.6275	46.7182	0.981213	0.948936	1	0.652239	Mus musculus RIKEN cDNA 1110049F12 gene (1110049F12Rik), mRNA,	RP23-161N17,10; AA408179; Trp26
ILMN_2623856	Map2k6	49.0255	45.5698	64.3014	75.5536	64.1667	41.8736	0.929512	1.17499	1	0.652575	Mus musculus mitogen-activated protein kinase kinase 6 (Map2k6), mRNA,	MEK6; Prkmk6; MKK6; SAPKK3
ILMN_1254374	Fzr1	373.167	411.085	486.637	428.87	325.61	212.495	1.10161	0.881294	1	0.652606	Mus musculus fizzy/cell division cycle 20 related 1 (Drosophila) (Fzr1), mRNA,	Cdh1; HCDH; FZR; FZR2; Fyr; HCDH1; AW108046
ILMN_2631939	LOC100048832	49.2711	29.222	122.967	42.2037	58.0436	37.8799	0.593085	0.343211	1	0.65261	PREDICTED: Mus musculus similar to branched chain aminotransferase 1, cytosolic (LOC100048832), mRNA,
ILMN_1235785	Traf7	84.3435	81.7052	228.904	251.267	139.225	90.8718	0.968719	1.0977	1	0.652698	Mus musculus Tnf receptor-associated factor 7 (Traf7), mRNA,	MGC7807; RFWD1
ILMN_2642571	Mxd3	35.2194	47.9559	38.9063	50.2365	46.555	30.3875	1.36163	1.29122	1	0.652724	Mus musculus Max dimerization protein 3 (Mxd3), mRNA,	4631412E13Rik; Mad3
ILMN_2871325	Pfkl	39.7385	40.6835	40.833	36.3081	39.8175	25.9918	1.02378	0.889184	1	0.652772	Mus musculus phosphofructokinase, liver, B-type (Pfkl), mRNA,	AA407869
ILMN_2612477	Rbm14	64.5346	61.114	215.711	227.707	114.34	74.6456	0.946996	1.05561	1	0.65284	Mus musculus RNA binding motif protein 14 (Rbm14), mRNA,	1300007E16Rik; p16; p16K; Sytip
ILMN_2589211	Timm44	308.506	309.198	366.908	372.538	296.951	193.902	1.00224	1.01534	1	0.652978	Mus musculus translocase of inner mitochondrial membrane 44 (Timm44), mRNA,	Tim44; D8Ertd118e; MGC144743; Mimt44; MGC118030; 0710005E20Rik; MGC144744
ILMN_2644792	Prpf3	36.3931	34.1087	85.1237	58.2901	45.4898	29.7044	0.93723	0.68477	1	0.65299	Mus musculus PRP3 pre-mRNA processing factor 3 homolog (yeast) (Prpf3), mRNA,	3632413F13Rik
ILMN_2661107	Atl2	86.8733	87.465	284.781	272.595	147.331	96.2085	1.00681	0.957207	1	0.653008	Mus musculus atlastin GTPase 2 (Atl2), transcript variant 2, mRNA,	AV334690; AA407293; 2010110I21Rik; Aip-2
ILMN_2602115	Klhdc4	50.5025	39.3343	184.554	134.32	66.4132	43.3726	0.778858	0.727806	1	0.653072	Mus musculus kelch domain containing 4 (Klhdc4), mRNA,	MGC19372; G430025P05Rik; BC012312; AV352552; AA408426
ILMN_2873510	Ppp4r1	583.217	483.556	1057.46	636.555	493.974	322.612	0.829118	0.601966	1	0.653095	Mus musculus protein phosphatase 4, regulatory subunit 1 (Ppp4r1), mRNA,	3110001J10Rik; Pp4r1; MGC31567
ILMN_2658914	AK122525	76.1344	40.6158	154.567	70.1866	91.4742	59.7508	0.533475	0.454084	1	0.653199	Mus musculus cDNA sequence AK122525 (AK122525), mRNA,	mKIAA1553
ILMN_2740859	Rela	490.918	464.557	1100.22	1272.3	465.071	303.8	0.946304	1.1564	1	0.653233	Mus musculus v-rel reticuloendotheliosis viral oncogene homolog A (avian) (Rela), mRNA,	p65
ILMN_2724868	Appbp2	713.247	1009.31	1330.78	1730.45	568.526	371.425	1.41509	1.30033	1	0.653312
ILMN_2679037	LOC100046883	46.8316	35.1157	87.6098	96.3956	55.7741	36.4396	0.749829	1.10028	1	0.653342	PREDICTED: Mus musculus similar to CKLF-like MARVEL transmembrane domain containing 3 (LOC100046883), mRNA,
ILMN_3049650	Kcnk6	40.3415	26.4347	79.148	57.2756	38.9439	25.4493	0.655272	0.723651	1	0.653487	Mus musculus potassium inwardly-rectifying channel, subfamily K, member 6 (Kcnk6), mRNA,	D7Ertd764e; Toss; Twik2
ILMN_3099758	Pi4k2b	45.3401	52.4759	129.683	82.3062	79.6158	52.0402	1.15738	0.634673	1	0.653642	Mus musculus phosphatidylinositol 4-kinase type 2 beta (Pi4k2b), transcript variant 2, mRNA,	4933409G22Rik; 2610042N09Rik
ILMN_1218612	Txnl4	888.904	666.349	729.778	514.803	698.6	456.707	0.749629	0.705425	1	0.653746
ILMN_1249347	Uxt	891.37	521.192	523.91	396.685	652.37	426.514	0.584709	0.757163	1	0.653792	Mus musculus ubiquitously expressed transcript (Uxt), mRNA,	0910002B17Rik
ILMN_2768330	Epc1	126.681	176.804	256.014	458.381	169.566	110.923	1.39566	1.79045	1	0.654159	Mus musculus enhancer of polycomb homolog 1 (Drosophila) (Epc1), transcript variant 1, mRNA,	A930032N02Rik; 5730566F07Rik; 2400007E14Rik
ILMN_1225033	Myg1	271.958	184.385	387.422	309.623	321.316	210.266	0.677991	0.799187	1	0.654391	Mus musculus melanocyte proliferating gene 1 (Myg1), mRNA,	5830429P19Rik; AI325965; Gamm1; 0610023A07Rik; 2810433J21Rik
ILMN_2482026	Ube2g1	89.0532	74.1963	535.879	440.264	276.1	180.68	0.833168	0.821574	1	0.654399	Mus musculus ubiquitin-conjugating enzyme E2G 1 (UBC7 homolog, C, elegans) (Ube2g1), mRNA,	D130023C12Rik; AU014992; AI256795; AW552068; 2700059C12Rik
ILMN_2783519	Acadl	43.7982	56.188	68.2228	149.749	55.3513	36.2318	1.28288	2.195	1	0.654579	Mus musculus acyl-Coenzyme A dehydrogenase, long-chain (Acadl), mRNA,	AA960361; LCAD; C79855; AU018452
ILMN_2991214	Gpd1l	33.2734	33.9548	47.7193	38.0144	35.1269	22.9961	1.02048	0.796626	1	0.654657	Mus musculus glycerol-3-phosphate dehydrogenase 1-like (Gpd1l), mRNA,	2210409H23Rik; D9Ertd660e
ILMN_1226366	Uck1	99.436	92.364	295.33	268.878	144.997	94.9329	0.928879	0.91043	1	0.654724	Mus musculus uridine-cytidine kinase 1 (Uck1), mRNA,	URK1; Umpk
ILMN_2997596	Olfr930	22.3353	21.4605	29.6139	23.8598	29.1107	19.0684	0.960833	0.805696	1	0.65503	Mus musculus olfactory receptor 930 (Olfr930), mRNA,	MOR171-46
ILMN_2763103	Arf6	506.272	327.743	1064.57	695.09	511.836	335.296	0.647366	0.652933	1	0.655086	Mus musculus ADP-ribosylation factor 6 (Arf6), mRNA,	AW496366; MGC102530
ILMN_1252392	Gabpa	65.5317	58.2988	181.42	149.672	76.81	50.3461	0.889626	0.824999	1	0.655463	Mus musculus GA repeat binding protein, alpha (Gabpa), mRNA,
ILMN_2634248	Syncrip	124.58	79.704	395.904	261.3	149.728	98.158	0.639782	0.660007	1	0.655574	Mus musculus synaptotagmin binding, cytoplasmic RNA interacting protein (Syncrip), transcript variant 1, mRNA,	Nsap1; pp68; Nsap1l; GRY-RBP; 4632417O19Rik; 2610109K23Rik
ILMN_2839973	Kat5	101.097	76.8661	207.792	258.843	133.75	87.7427	0.760322	1.24568	1	0.65602	Mus musculus K(lysine) acetyltransferase 5 (Kat5), mRNA,	Tip60; Htatip1; Tip55; 60kDa; PLIP; MGC117972; AI839539
ILMN_1232800	Cyfip2	54.5423	51.2721	64.7287	42.1862	43.2554	28.3795	0.940042	0.651739	1	0.656091	Mus musculus cytoplasmic FMR1 interacting protein 2 (Cyfip2), mRNA,	mKIAA1168; Pir121; 1500004I01Rik; AU022376; AA930218; 6430511D02Rik
ILMN_2594433	Taf6l	54.1528	58.2288	47.9648	46.0467	38.7651	25.4367	1.07527	0.960011	1	0.656175	Mus musculus TAF6-like RNA polymerase II, p300/CBP-associated factor (PCAF)-associated factor (Taf6l), mRNA,	BB223262; PAF65A; MGC41377; 2810417N14Rik; C530024J06Rik
ILMN_2731260	Tmem143	93.228	65.7183	109.146	58.1055	96.9474	63.6298	0.70492	0.532363	1	0.656334	Mus musculus transmembrane protein 143 (Tmem143), mRNA,	2310076O21Rik; AI481604
ILMN_3024238	Top1mt	46.286	32.9447	68.8542	44.8789	69.9225	45.9097	0.711763	0.651796	1	0.656579	Mus musculus DNA topoisomerase 1, mitochondrial (Top1mt), mRNA,	2900052H09Rik
ILMN_1226798	Stra13	50.8792	29.9685	74.312	42.4053	52.8384	34.6928	0.589012	0.570639	1	0.656583	Mus musculus stimulated by retinoic acid 13 (Stra13), mRNA,
ILMN_2796651	Oprs1	139.11	132.429	347.921	263.203	119.385	78.3866	0.951974	0.7565	1	0.656585	Mus musculus opioid receptor, sigma 1 (Oprs1), mRNA,	AL024364; mSigmaR1
ILMN_2736762	Ifrd2	231.024	104.22	395.924	111.914	158.529	104.127	0.451122	0.282665	1	0.656832	Mus musculus interferon-related developmental regulator 2 (Ifrd2), mRNA,	1810034A24Rik; AI838527; SKMc15; AA470234
ILMN_3161906	EG432879	34.912	36.6232	61.2997	55.2704	39.3852	25.871	1.04901	0.901642	1	0.65687	Mus musculus predicted gene, EG432879 (EG432879), mRNA,
ILMN_2711007	Ap2b1	64.9808	56.7125	81.5069	71.729	65.2261	42.8572	0.872757	0.880036	1	0.657057	Mus musculus adaptor-related protein complex 2, beta 1 subunit (Ap2b1), transcript variant 1, mRNA,	1300012O03Rik; AI788979
ILMN_2837195	6720467C03Rik	21.5936	21.5959	23.5901	22.2807	34.2193	22.4891	1.0001	0.944495	1	0.657205	Mus musculus RIKEN cDNA 6720467C03 gene (6720467C03Rik), mRNA,
ILMN_1230489	Zfand2a	149.777	116.13	299.372	285.655	196.403	129.081	0.775351	0.954179	1	0.657225	Mus musculus zinc finger, AN1-type domain 2A (Zfand2a), mRNA,	AA407930; AU016206; Airap
ILMN_2958207	Nsdhl	34.7549	32.3925	55.6072	52.3434	37.7047	24.7807	0.932025	0.941307	1	0.657231	Mus musculus NAD(P) dependent steroid dehydrogenase-like (Nsdhl), mRNA,	H105E3; Str; XAP104; Bpa; AI747449
ILMN_3160787	Uba2	1122.22	722.715	2520	1763.59	1180.47	775.88	0.644004	0.699838	1	0.657265	Mus musculus ubiquitin-like modifier activating enzyme 2 (Uba2), mRNA,	Ubl1a2; UBA2; Arx; UBA1; AA986091; Uble1b
ILMN_2759114	Cmtm4	52.4749	51.3022	118.502	101.505	49.1538	32.3081	0.977652	0.856572	1	0.657287	Mus musculus CKLF-like MARVEL transmembrane domain containing 4 (Cmtm4), mRNA,	D19397; MGC30490; Cklfsf4
ILMN_3107690	1700047I17Rik1	70.1991	60.8671	85.8433	109.796	79.9019	52.5463	0.867064	1.27903	1	0.657635	Mus musculus RIKEN cDNA 1700047I17 gene 1 (1700047I17Rik1), mRNA,	D730001C10Rik; 1700047I17Rik; C14orf24
ILMN_2694998	Chmp2a	157.262	179.533	201.386	455.21	194.98	128.271	1.14161	2.26039	1	0.657866	Mus musculus chromatin modifying protein 2A (Chmp2a), mRNA,	1500016L11Rik
ILMN_2712066	Pgd	2275.53	2222.21	4105.92	3611.95	1952.44	1284.61	0.976569	0.879692	1	0.657953
ILMN_2905386	EG433923	1618.88	947.344	3910.25	3466.96	2236.98	1471.86	0.585185	0.886633	1	0.657965	Mus musculus predicted gene, EG433923 (EG433923), mRNA,
ILMN_2618481	Eif4a1	1497.14	1556.43	2843.36	3343.59	1840.22	1211.17	1.03961	1.17593	1	0.658167	Mus musculus eukaryotic translation initiation factor 4A1 (Eif4a1), mRNA,	Eif4; Ddx2a; BM-010
ILMN_2612125	Arhgef18	193.504	36.2221	526.512	152.928	219.889	144.749	0.187191	0.290454	1	0.658283	Mus musculus rho/rac guanine nucleotide exchange factor (GEF) 18 (Arhgef18), mRNA,	D030053O22Rik; AI467246
ILMN_2970429	Uck1	42.3337	34.6807	39.7626	40.4754	42.9031	28.2505	0.819222	1.01792	1	0.658472	Mus musculus uridine-cytidine kinase 1 (Uck1), mRNA,	URK1; Umpk
ILMN_1242377	Jmjd6	1533.93	977.612	2775.02	1544.36	1655.44	1090.35	0.637325	0.55652	1	0.658647	Mus musculus jumonji domain containing 6 (Jmjd6), mRNA,	Ptdsr; mKIAA0585; PtdSerR; PSR; D11Ertd195e; 5730436I23Rik
ILMN_2607342	LOC100044103	32.0005	24.4521	42.6569	32.4569	34.3547	22.6325	0.764118	0.760882	1	0.65879	PREDICTED: Mus musculus similar to mKIAA1645 protein (LOC100044103), mRNA,
ILMN_2864834	Abcb8	253.867	278.515	278.462	267.844	189.158	124.652	1.09709	0.961869	1	0.658982	Mus musculus ATP-binding cassette, sub-family B (MDR/TAP), member 8 (Abcb8), nuclear gene encoding mitochondrial protein, mRNA,	AA409895; 4833412N02Rik
ILMN_1234419	Bag2	106.65	90.5004	419.349	169.62	192.944	127.148	0.848574	0.404484	1	0.658991	Mus musculus BCL2-associated athanogene 2 (Bag2), mRNA,	BC016230; MGC36682; 2610042A13Rik
ILMN_2755519	Mrpl54	1424.3	1104.35	922.168	754.489	1045.07	688.832	0.775364	0.818169	1	0.659127	Mus musculus mitochondrial ribosomal protein L54 (Mrpl54), nuclear gene encoding mitochondrial protein, mRNA,	0610008M19Rik; D10Sut1e
ILMN_2750402	Nudt19	330.354	160.89	768.161	434.072	520.12	342.857	0.487022	0.56508	1	0.659189	Mus musculus nudix (nucleoside diphosphate linked moiety X)-type motif 19 (Nudt19), mRNA,	D7Rp2-r; D7Rp2e; RP2-r; D7Rp2-s; RP2-s; D7Rp2
ILMN_2913544	Ssrp1	1258.97	622.738	1402.94	833.888	1035.36	682.921	0.494639	0.594384	1	0.659599	Mus musculus structure specific recognition protein 1 (Ssrp1), mRNA,	Hmgox; T160; Hmgi-rs3; Hmg1-rs1; C81323
ILMN_2865882	3830402I07Rik	102.177	84.6624	63.6261	63.8851	83.3418	54.9938	0.828587	1.00407	1	0.659858	Mus musculus RIKEN cDNA 3830402I07 gene (3830402I07Rik), mRNA,
ILMN_2649955	Tarbp2	62.1143	47.7609	83.262	67.4392	56.6061	37.3532	0.768919	0.809964	1	0.659879	Mus musculus TAR (HIV) RNA binding protein 2 (Tarbp2), mRNA,	Prbp
ILMN_2953277	EG433182	258.101	219.268	589.127	344.098	494.245	326.146	0.849542	0.584082	1	0.659889	Mus musculus predicted gene, EG433182 (EG433182), mRNA,
ILMN_2791578	Gspt1	4440.85	3140.59	9588.76	5664.18	4917.15	3244.77	0.707204	0.59071	1	0.659889	Mus musculus G1 to S phase transition 1 (Gspt1), mRNA,	G1st; Gst-1; AV307676; MGC36230; AI326449; C79774; MGC36735
ILMN_1230991	LOC100041835	3465.53	2289.15	1721.69	1760.72	2872.97	1896.58	0.660548	1.02267	1	0.660148	PREDICTED: Mus musculus similar to H+ ATP synthase (LOC100041835), mRNA,
ILMN_1257428	Fkbp4	2633.07	1394.76	2533.51	1101.82	1922.26	1269.18	0.529708	0.434899	1	0.660257	Mus musculus FK506 binding protein 4 (Fkbp4), mRNA,	AL022792; 59kDa; p59; AW208983; FKPB52; FKBP-52
ILMN_3075774	Ctdspl2	35.0231	34.1212	65.3064	62.8529	50.1234	33.0954	0.974249	0.96243	1	0.660279	Mus musculus CTD (carboxy-terminal domain, RNA polymerase II, polypeptide A) small phosphatase like 2 (Ctdspl2), mRNA,	D2Ertd485e
ILMN_2726714	D0H8S2298E	53.0073	43.1306	67.8012	60.3818	47.0469	31.0694	0.813673	0.890572	1	0.660394
ILMN_1220416	Toe1	34.2125	32.5426	100.233	91.0807	45.7251	30.2027	0.951193	0.908692	1	0.660527	Mus musculus target of EGR1, member 1 (nuclear) (Toe1), mRNA,	AI413517; 4930584N22Rik; 4933424D16Rik
ILMN_2755668	Apbb1ip	119.971	58.7498	139.013	48.2253	88.4224	58.4194	0.489701	0.346913	1	0.660685	Mus musculus amyloid beta (A4) precursor protein-binding, family B, member 1 interacting protein (Apbb1ip), mRNA,	9930118P07Rik; Prp48
ILMN_2655437	LOC100045963	176.256	133.044	279.46	131.7	170.649	112.749	0.754836	0.471267	1	0.660706	PREDICTED: Mus musculus similar to Ring finger protein 126 (LOC100045963), mRNA,
ILMN_2626547	Pmm2	51.0367	38.6046	222.73	85.7686	61.5741	40.6856	0.756408	0.38508	1	0.660759	Mus musculus phosphomannomutase 2 (Pmm2), mRNA,	C86848; AI585868
ILMN_2502542	Uap1	139.859	121.349	384.257	288.342	166.636	110.113	0.867652	0.75039	1	0.660801	Mus musculus UDP-N-acetylglucosamine pyrophosphorylase 1 (Uap1), mRNA,	AGX1; AGX-2; AgX; AA437972; AGX-1; SPAG2; ESTM38; AA420407
ILMN_2598972	Atp5b	12322.9	12311.7	20060	16648.5	13746.6	9084.43	0.999086	0.829932	1	0.660851	Mus musculus ATP synthase, H+ transporting mitochondrial F1 complex, beta subunit (Atp5b), nuclear gene encoding mitochondrial protein, mRNA,
ILMN_2963091	E130012A19Rik	675.237	445.28	1238.42	714.353	577.253	381.485	0.659442	0.576825	1	0.660863	Mus musculus RIKEN cDNA E130012A19 gene (E130012A19Rik), mRNA,	AW539173; AI413509; AA409164; RP23-94N18,3
ILMN_2750098	Chmp7	42.1992	38.4097	86.5349	106.503	63.6856	42.0885	0.910201	1.23075	1	0.660879	Mus musculus CHMP family, member 7 (Chmp7), mRNA,	AW550775; 4930596K11Rik; 6330407G04Rik; AI450338; MGC29816
ILMN_2612423	Hnrnpab	6768.06	5561.48	16317	10567	7570.03	5003.02	0.821725	0.647611	1	0.660898	Mus musculus heterogeneous nuclear ribonucleoprotein A/B (Hnrnpab), transcript variant 1, mRNA,	3010025C11Rik; Cgbfa; CBF-A
ILMN_2691360	Mrps10	279.308	194.407	405.544	324.234	254.986	168.536	0.696031	0.799504	1	0.660962	Mus musculus mitochondrial ribosomal protein S10 (Mrps10), nuclear gene encoding mitochondrial protein, mRNA,	AW743084; Rpms10; 1110038B19Rik
ILMN_3158200	Anapc5	105.432	103.49	176.328	233.786	149.946	99.1773	0.981577	1.32586	1	0.661418	Mus musculus anaphase-promoting complex subunit 5 (Anapc5), transcript variant 1, mRNA,	AA986414; AA536819; 2510006G12Rik; Anpc5; AA408751
ILMN_2640401	Pafah1b1	327.298	329.866	538.377	486.314	296.844	196.345	1.00785	0.903296	1	0.661443	Mus musculus platelet-activating factor acetylhydrolase, isoform 1b, beta1 subunit (Pafah1b1), mRNA,	MGC25297; MMS10-U; Mdsh; Ms10u; LIS-1; Lis1; Pafaha
ILMN_3076864	Smad5	41.5317	38.8892	58.0303	44.1368	41.4629	27.4316	0.936375	0.760581	1	0.661594	Mus musculus MAD homolog 5 (Drosophila) (Smad5), mRNA,	1110051M15Rik; Dwf-C; MusMLP; Madh5; AI451355
ILMN_2592629	Nipsnap3a	39.5322	35.3024	235.905	177.223	108.077	71.5166	0.893004	0.751249	1	0.66172	Mus musculus nipsnap homolog 3A (C, elegans) (Nipsnap3a), mRNA,	Nipsnap3b; 2700063N13Rik
ILMN_3159387	Eif4g1	608.454	424.058	415.306	308.847	452.574	299.548	0.696944	0.743661	1	0.661876	Mus musculus eukaryotic translation initiation factor 4, gamma 1 (Eif4g1), transcript variant 1, mRNA,	E030015G23Rik; MGC90776; MGC37551; eIF4GI
ILMN_2815313	Tcf20	58.4801	55.3227	61.0938	59.6713	75.9308	50.2623	0.946009	0.976716	1	0.661948	Mus musculus transcription factor 20 (Tcf20), mRNA,	2810438H08Rik; mKIAA0292; SPBP
ILMN_3161612	Ireb2	75.6896	91.3418	195.584	154.624	82.8088	54.8173	1.20679	0.790578	1	0.661974	Mus musculus iron responsive element binding protein 2 (Ireb2), mRNA,	Irp2; DKFZp564D1164; D9Ertd85e
ILMN_1215903	Ap1s1	105.132	68.7795	130.724	101.917	107.915	71.4533	0.654218	0.779641	1	0.662123	Mus musculus adaptor protein complex AP-1, sigma 1 (Ap1s1), mRNA,	AP19
ILMN_1220530	Smc1a	45.4307	44.4984	54.1145	44.6583	42.5764	28.1914	0.97948	0.825255	1	0.662137	Mus musculus structural maintenance of chromosomes 1A (Smc1a), mRNA,	SMCB; KIAA0178; mKIAA0178; SB1,8; Smc1l1; Smc1alpha; 5830426I24Rik; Smc1
ILMN_2986605	Pdss1	202.636	162.43	565.993	253.654	206.376	136.656	0.801586	0.448159	1	0.662168	Mus musculus prenyl (solanesyl) diphosphate synthase, subunit 1 (Pdss1), mRNA,	Tprt; TPT; mDLP1; mSPS1; 2610203G20Rik; 2700031G06Rik
ILMN_2524723	2810470D21Rik	43.3672	43.6012	65.8921	47.8834	54.8313	36.3203	1.0054	0.726694	1	0.662401
ILMN_2810045	Iars	862.375	489.625	1392.93	993.799	811.195	537.354	0.567764	0.713458	1	0.662422	Mus musculus isoleucine-tRNA synthetase (Iars), mRNA,	2510016L12Rik; E430001P04Rik; ILRS; AI327140; AU044614
ILMN_3034381	Nup88	49.212	50.235	311.681	273.569	125.699	83.2657	1.02079	0.877722	1	0.662423	Mus musculus nucleoporin 88 (Nup88), transcript variant 1, mRNA,	88kDa; Nup84; Prei2
ILMN_2606973	AV028368	108.094	82.3239	182.697	152.177	85.1536	56.4166	0.761597	0.832948	1	0.662527
ILMN_1252057	Fbxo31	189.7	201.897	263.011	164.644	156.178	103.496	1.0643	0.625997	1	0.662676	Mus musculus F-box protein 31 (Fbxo31), mRNA,	2310046N15Rik; Fbxo14; Fbx14
ILMN_2617920	1110017D15Rik	89.2263	117.167	43.1443	50.6931	56.0015	37.1153	1.31314	1.17497	1	0.662755	Mus musculus RIKEN cDNA 1110017D15 gene (1110017D15Rik), transcript variant 2, mRNA, XM_896996 XM_911474 XM_921988 XM_921993 XM_921997 XM_922001 XM_922006 XM_984085 XM_984115 XM_984145 XM_984173 XM_984201 XM_984239	Cbe1; smrp1; RP23-100C7,3
ILMN_1237736	Plekhf2	106.565	87.0508	323.647	244.888	135.934	90.1354	0.816882	0.75665	1	0.663083	Mus musculus pleckstrin homology domain containing, family F (with FYVE domain) member 2 (Plekhf2), mRNA,	AA673237; ZFYVE18; 1110070J07Rik
ILMN_2643513	Asns	1588.57	1116.1	2780.04	2312.31	1506.47	999.053	0.702578	0.831754	1	0.663176	Mus musculus asparagine synthetase (Asns), mRNA,
ILMN_2632264	Acot7	1847.14	1270.13	2168.38	1216.3	1336	886.245	0.68762	0.560926	1	0.663358	Mus musculus acyl-CoA thioesterase 7 (Acot7), mRNA,	LACH1; AU015130; AU042212; Bach; ACH1; 2410041A17Rik; ACT; CTE-II; AW557066
ILMN_2955020	Ticam2	30.7314	23.8926	42.562	23.5676	32.4527	21.5284	0.777465	0.553724	1	0.663379	Mus musculus toll-like receptor adaptor molecule 2 (Ticam2), mRNA,	TICAM-2; Trif; B430113A10; MGC107370; TRAM; Tirp
ILMN_3160486	Tmem158	32.635	28.7631	60.9524	35.7399	42.9436	28.4884	0.881357	0.586358	1	0.663392	Mus musculus transmembrane protein 158 (Tmem158), mRNA,	Ris1; 2310037P21Rik
ILMN_2625058	2310037I24Rik	69.8481	65.2671	364.55	202.048	187.522	124.404	0.934415	0.554239	1	0.663409	Mus musculus RIKEN cDNA 2310037I24 gene (2310037I24Rik), mRNA,	MGC101985; B930009D17; MGC102368
ILMN_2894245	Sfmbt1	106.493	105.416	130	104.794	98.7891	65.5485	0.989884	0.806108	1	0.66352	Mus musculus Scm-like with four mbt domains 1 (Sfmbt1), mRNA,	Smr; DKFZp434L243; Sfmbt
ILMN_2656359	Samd10	39.4583	32.037	43.5792	44.4939	39.1635	25.9891	0.811919	1.02099	1	0.663606	Mus musculus sterile alpha motif domain containing 10 (Samd10), mRNA,	D930033N23Rik; E130318E08
ILMN_1248463	Ptch1	31.133	34.8849	32.6188	31.6999	30.4474	20.208	1.12051	0.971829	1	0.663701	Mus musculus patched homolog 1 (Ptch1), mRNA,	A230106A15Rik; Ptc; mes; Ptc1; Ptch
ILMN_1217000	Tfpt	87.1173	72.2723	78.5024	56.432	98.7929	65.5742	0.829597	0.718858	1	0.663754	Mus musculus TCF3 (E2A) fusion partner (Tfpt), mRNA,	2400004F01Rik; FB1; Amida; AI450389
ILMN_2719131	2610101N10Rik	45.5649	50.2275	185.419	107.555	65.9746	43.8069	1.10233	0.580063	1	0.663997	Mus musculus RIKEN cDNA 2610101N10 gene (2610101N10Rik), mRNA,
ILMN_1259714	Cdk6	34.0601	24.6465	53.854	28.9354	33.9565	22.5471	0.723617	0.537294	1	0.664	Mus musculus cyclin-dependent kinase 6 (Cdk6), mRNA,	Crk2; 5830411I20; AI504062
ILMN_3014257	Zc3h14	141.423	162.853	323.525	333.15	198.757	131.987	1.15153	1.02975	1	0.664059	Mus musculus zinc finger CCCH type containing 14 (Zc3h14), transcript variant 1, mRNA,	1700016A15Rik; AU014748; 2700069A02Rik; 1010001P15Rik
ILMN_1253150	Otud6b	102.249	59.7152	508.073	263.572	155.323	103.206	0.584019	0.518767	1	0.664461	Mus musculus OTU domain containing 6B (Otud6b), mRNA,	AU015433; 2600013N14Rik; MGC103361
ILMN_2728697	Actr1a	539.214	447.361	1069.04	1155.43	543.187	360.941	0.829654	1.08081	1	0.664489	Mus musculus ARP1 actin-related protein 1 homolog A, centractin alpha (yeast) (Actr1a), mRNA,	alpha-Arp1; Arp1
ILMN_2662097	Rab35	437.466	300.936	1231.13	827.704	415.175	275.885	0.687907	0.672313	1	0.664502	Mus musculus RAB35, member RAS oncogene family (Rab35), mRNA,	9530019H02Rik; RAY; RAB1C; AU040256; H-ray
ILMN_1259684	Endogl1	120.557	153.741	181.686	218.169	130.184	86.5206	1.27525	1.2008	1	0.6646	Mus musculus endonuclease G-like 1 (Endogl1), mRNA,	ENGL; AW557704; ENGL-B; ENGL-a; ENDOGL2; 4732466J24
ILMN_3077377	Wars	56.3557	44.1919	92.5932	70.6518	60.7434	40.3769	0.784161	0.763034	1	0.664712	Mus musculus tryptophanyl-tRNA synthetase (Wars), mRNA,	WRS
ILMN_2828819	Lig3	246.894	226.345	356.269	219.896	217.467	144.571	0.916768	0.61722	1	0.664796	Mus musculus ligase III, DNA, ATP-dependent (Lig3), nuclear gene encoding mitochondrial protein, mRNA,	MGC78176; D11Wsu78e
ILMN_1241909	Atl3	49.9944	49.9583	73.7995	80.6249	50.1801	33.3715	0.999277	1.09249	1	0.665033	Mus musculus atlastin GTPase 3 (Atl3), mRNA,	4633402C03Rik; AI465397; MGC28761
ILMN_3105075	Polr2d	290.909	199.754	557.771	383.246	351.852	234.128	0.686654	0.687104	1	0.665416	Mus musculus polymerase (RNA) II (DNA directed) polypeptide D (Polr2d), transcript variant 2, mRNA,	2310002G05Rik; RBP4; HSRBP4; 2610028L19Rik
ILMN_3161591	Uevld	44.0722	39.5425	80.2872	68.1512	51.6523	34.3704	0.89722	0.848843	1	0.665418	Mus musculus UEV and lactate/malate dehyrogenase domains (Uevld), mRNA,	Attp; 8430408E05Rik
ILMN_2944185	Nit2	36.0603	35.463	89.1886	99.1922	49.3637	32.8565	0.983434	1.11216	1	0.6656	Mus musculus nitrilase family, member 2 (Nit2), mRNA,	1190017B19Rik; D16Ertd502e
ILMN_1220545	Mutyh	43.7448	41.9709	58.1514	37.2583	48.3434	32.1824	0.959449	0.640712	1	0.665703	Mus musculus mutY homolog (E, coli) (Mutyh), nuclear gene encoding mitochondrial protein, mRNA,	Mutyhbeta; Mutyhc; Myh; Mutyhb; Mutyhalpha; 5730495A01Rik; Mutyha
ILMN_1217184	Aof1	27.9696	30.9893	34.9096	31.8142	33.4807	22.2977	1.10796	0.91133	1	0.665988	Mus musculus amine oxidase, flavin containing 1 (Aof1), mRNA,	4632428N09Rik; AI482520; MGC38211
ILMN_2757599	Sas	73.3925	173.241	34.1959	37.6234	93.6881	62.413	2.36047	1.10023	1	0.666179
ILMN_2695149	Smc5l1	148.372	177.659	415.748	414.695	151.387	100.888	1.19739	0.997466	1	0.666427
ILMN_1222492	Mipep	604.695	662.354	1103.52	1195.04	588.233	392.036	1.09535	1.08294	1	0.666464	Mus musculus mitochondrial intermediate peptidase (Mipep), mRNA,	5730405E07Rik
ILMN_2962747	Fzr1	974.865	878.494	1578.93	1875.39	1057.47	704.803	0.901145	1.18776	1	0.666496	Mus musculus fizzy/cell division cycle 20 related 1 (Drosophila) (Fzr1), mRNA,	Cdh1; HCDH; FZR; FZR2; Fyr; HCDH1; AW108046
ILMN_2426921	Wdr5	226.364	206.42	446.695	284.081	239.334	159.589	0.911893	0.635962	1	0.666802	Mus musculus WD repeat domain 5 (Wdr5), mRNA,	Big; AA960360; 2410008O07Rik; Big-3; AA408785
ILMN_2705227	Dapk3	90.3084	102.328	93.5588	91.0768	64.782	43.2008	1.13309	0.973471	1	0.666865	Mus musculus death-associated protein kinase 3 (Dapk3), mRNA,
ILMN_2733380	Snx17	72.0991	60.4819	369.198	556.122	145.713	97.1718	0.838872	1.5063	1	0.666872	Mus musculus sorting nexin 17 (Snx17), mRNA,	5830447M19Rik; D5Ertd260e; AI790646; mKIAA0064
ILMN_2906471	Gbl	225.191	262.358	482.009	467.349	244.025	162.763	1.16504	0.969584	1	0.666995	Mus musculus G protein beta subunit-like (Gbl), mRNA,	AI851821; AA409454; 0610033N12Rik; AI505104
ILMN_2599295	Rbm19	253.68	144.308	242.665	107.879	146.804	97.9531	0.56886	0.44456	1	0.667236	Mus musculus RNA binding motif protein 19 (Rbm19), mRNA,	NPO; AV302714; KIAA0682; 1200009A02Rik
ILMN_2806291	Kbtbd4	100.239	76.3919	167.583	158.194	106.756	71.2597	0.762096	0.943977	1	0.667502	Mus musculus kelch repeat and BTB (POZ) domain containing 4 (Kbtbd4), mRNA,	2510026C23Rik
ILMN_2677170	Oprs1	255.929	215.173	890.033	691.919	218.289	145.714	0.840751	0.777408	1	0.667528	Mus musculus opioid receptor, sigma 1 (Oprs1), mRNA,	AL024364; mSigmaR1
ILMN_2745259	Emd	90.7489	72.4774	194.397	179.289	122.796	81.9715	0.798658	0.922282	1	0.667544	Mus musculus emerin (Emd), mRNA,	AW550900
ILMN_2718090	Dolpp1	32.0419	33.9971	54.0828	56.7623	40.5388	27.0629	1.06102	1.04954	1	0.667579	Mus musculus dolichyl pyrophosphate phosphatase 1 (Dolpp1), mRNA,	AB030189; LSFR2; 0610011H20Rik
ILMN_2609772	Ccdc82	33.8421	32.2884	38.6162	40.8075	39.5644	26.4147	0.954089	1.05675	1	0.667639	Mus musculus coiled-coil domain containing 82 (Ccdc82), mRNA,	FLJ23518; 2310043N13Rik; MGC107477
ILMN_1231587	BC030867	69.9041	58.1584	86.241	50.2563	59.0223	39.4105	0.831975	0.582742	1	0.667723	Mus musculus cDNA sequence BC030867 (BC030867), mRNA,	MGC117894; RP23-461C4,3; MGC31269
ILMN_1250076	Tbc1d10a	33.4967	35.6535	33.8646	33.4326	34.4804	23.0315	1.06439	0.987243	1	0.667959	Mus musculus TBC1 domain family, member 10a (Tbc1d10a), mRNA,	FLJ00288; AI447804; Tbc1d10; mFLJ00288; RP23-453B22,5; EPI64
ILMN_2667384	Slc6a9	174.011	254.196	396.177	481.59	175.429	117.192	1.4608	1.21559	1	0.66803	Mus musculus solute carrier family 6 (neurotransmitter transporter, glycine), member 9 (Slc6a9), mRNA,	Glyt-1; Glyt1
ILMN_2715289	Exosc7	2232.16	1450.18	2626.28	1965.28	2650.36	1770.73	0.649676	0.748311	1	0.668108	Mus musculus exosome component 7 (Exosc7), mRNA,	AV212732; mKIAA0116; 2610002K22Rik
ILMN_1223358	Setd6	549.658	557.281	774.409	539.966	439.83	293.857	1.01387	0.697262	1	0.668115	Mus musculus SET domain containing 6 (Setd6), mRNA,	3110004G14Rik; C76402; 0610039J04Rik; AI413388
ILMN_2462202	Ube2m	430.434	263.878	376.778	238.83	288.272	192.6	0.61305	0.633876	1	0.668121	Mus musculus ubiquitin-conjugating enzyme E2M (UBC12 homolog, yeast) (Ube2m), mRNA,	MGC37197; MGC25453; UBC12; Ubc-rs2
ILMN_2746055	Afg3l1	413.046	389.734	361.13	363.206	352.858	235.776	0.943561	1.00575	1	0.66819	Mus musculus AFG3(ATPase family gene 3)-like 1 (yeast) (Afg3l1), mRNA,	1700047G05Rik; 3110061K15Rik
ILMN_3029489	Gm129	80.611	110.271	124.547	91.5723	180.04	120.311	1.36794	0.735246	1	0.668247	Mus musculus gene model 129, (NCBI) (Gm129), mRNA, XM_907670 XM_920513 XM_920520 XM_920527 XM_920533
ILMN_1255697	1110049F12Rik	575.991	537.156	1136.11	1104.73	508.233	339.627	0.932577	0.97238	1	0.668252	Mus musculus RIKEN cDNA 1110049F12 gene (1110049F12Rik), mRNA,	RP23-161N17,10; AA408179; Trp26
ILMN_1227159	Dut	66.3124	37.6718	108.81	48.8002	70.7577	47.2849	0.568095	0.448488	1	0.668265	Mus musculus deoxyuridine triphosphatase (Dut), nuclear gene encoding mitochondrial protein, mRNA,	5031412I06Rik; dUTPase; D2Bwg0749e; 5133400F09Rik; Dutp
ILMN_2657376	Nipsnap3a	61.8817	46.3394	214.907	143.579	114.882	76.7854	0.748838	0.668098	1	0.668386	Mus musculus nipsnap homolog 3A (C, elegans) (Nipsnap3a), mRNA,	Nipsnap3b; 2700063N13Rik
ILMN_2491792	Vps16	202.94	244.514	182.097	188.675	184.956	123.623	1.20486	1.03612	1	0.668394	Mus musculus vacuolar protein sorting 16 (yeast) (Vps16), mRNA,	MGC7352; 1810074M16Rik
ILMN_1257515	Mcrs1	259.118	143.528	335.271	214.135	261.323	174.685	0.553909	0.638694	1	0.668464	Mus musculus microspherule protein 1 (Mcrs1), mRNA,	ICP22BP; P78; MSP58; C78274; MGC117915; MGC103140
ILMN_3135697	1200003I07Rik	140.431	189.654	239.09	256.113	151.869	101.519	1.35051	1.0712	1	0.668467	Mus musculus RIKEN cDNA 1200003I07 gene (1200003I07Rik), transcript variant 3, mRNA,
ILMN_2923864	Casp6	64.142	77.4094	99.829	124.142	91.2769	61.017	1.20685	1.24355	1	0.668482	Mus musculus caspase 6 (Casp6), mRNA,	Mch2; mCASP-6
ILMN_2684874	Fxc1	356.117	223.128	161.343	132.087	318.533	212.945	0.626558	0.818674	1	0.668518	Mus musculus fractured callus expressed transcript 1 (Fxc1), mRNA,	Tim10b; Timm10b; Tim9b
ILMN_3158341	Usp6nl	80.629	64.7545	152.326	108.856	85.2343	56.9856	0.803117	0.714627	1	0.668575	Mus musculus USP6 N-terminal like (Usp6nl), transcript variant 2, mRNA,	TRE2NL; RNTRE; mKIAA0019; AI316785
ILMN_1258341	Chpf	39.55	40.2001	62.7402	74.9532	44.5796	29.8072	1.01644	1.19466	1	0.668629	Mus musculus chondroitin polymerizing factor (Chpf), transcript variant 1, mRNA,	AI414328; 1700028N03Rik
ILMN_2695281	Nup155	65.9678	63.4687	141.085	87.4182	81.9742	54.8107	0.962116	0.619615	1	0.668634	Mus musculus nucleoporin 155 (Nup155), mRNA,	D930027M19Rik; mKIAA0791
ILMN_2644606	Cox4nb	407.241	301.678	405.405	300.535	322.788	215.842	0.740785	0.741321	1	0.668679	Mus musculus COX4 neighbor (Cox4nb), mRNA,	Noc4
ILMN_2510196	Gtpbp1	235.485	254.925	187.058	138.771	190.153	127.186	1.08255	0.741863	1	0.668861
ILMN_2693205	Aspm	99.0829	82.7707	263.835	209.561	114.99	76.9136	0.835368	0.794286	1	0.668872	Mus musculus asp (abnormal spindle)-like, microcephaly associated (Drosophila) (Aspm), mRNA,	Calmbp1; Sha1; MCPH5; D330028K02Rik; FLJ10518
ILMN_2755384	Dek	35.0468	27.0217	119.775	74.7538	40.4698	27.07	0.771016	0.624119	1	0.668895	Mus musculus DEK oncogene (DNA binding) (Dek), mRNA,	1810019E15Rik; D13H6S231E
ILMN_2838372	2010111I01Rik	116.287	79.5961	135.36	75.2841	102.486	68.555	0.68448	0.556177	1	0.668924	Mus musculus RIKEN cDNA 2010111I01 gene (2010111I01Rik), mRNA, XM_988363	2300006M17Rik; Aopep
ILMN_3090825	Fusip1	65.8287	115.017	71.8857	96.9666	61.4288	41.0958	1.74721	1.3489	1	0.668999	Mus musculus FUS interacting protein (serine-arginine rich) 1 (Fusip1), transcript variant 2, mRNA,	NSSR2; Nssr; SRrp40; TASR; FUSIP2; NSSR1; TASR2; TASR1
ILMN_2932713	Pim1	33.9356	34.7418	35.2118	35.257	40.4118	27.0385	1.02376	1.00128	1	0.669075	Mus musculus proviral integration site 1 (Pim1), mRNA,	Pim-1
ILMN_2800151	Lsm2	266.501	135.283	657.433	315.778	355.712	238.028	0.507629	0.48032	1	0.669159	Mus musculus LSM2 homolog, U6 small nuclear RNA associated (S, cerevisiae) (Lsm2), mRNA,	SmX5; D17H6S56E-2; G7b; snRNP; Dmapl; D17H6S56E2; Sm-X5; MGC13889; Dmpkap
ILMN_2747070	Fpgs	75.3653	82.9325	160.407	117.03	94.2803	63.0925	1.10041	0.729581	1	0.669202	Mus musculus folylpolyglutamyl synthetase (Fpgs), mRNA,	AA408187
ILMN_1223315	Scarb1	32.1029	32.5839	39.6857	35.5707	35.3466	23.6576	1.01498	0.89631	1	0.669304	Mus musculus scavenger receptor class B, member 1 (Scarb1), mRNA,	SR-BI; SRBI; AI120173; Srb1; Cla1; mSR-BI; D5Ertd460e; Cla-1; Cd36l1; CD36; SR-B1
ILMN_2904979	Dus3l	69.1982	57.3554	78.8332	51.7448	54.0674	36.189	0.828857	0.656383	1	0.669331	Mus musculus dihydrouridine synthase 3-like (S, cerevisiae) (Dus3l), mRNA, XM_978180 XM_978219 XM_978263	MGC56820; AI662135; AW557805
ILMN_1243711	Adarb1	116.672	103.793	202.345	108.171	95.2824	63.776	0.889618	0.534589	1	0.669336	Mus musculus adenosine deaminase, RNA-specific, B1 (Adarb1), transcript variant 3, mRNA,	1700057H01Rik; D10Bwg0447e; AW558573; ADAR2; AW124433; BB220382; RED1
ILMN_1257333	2310022B05Rik	137.125	150.995	392.963	433.296	301.004	201.536	1.10114	1.10264	1	0.669546	Mus musculus RIKEN cDNA 2310022B05 gene (2310022B05Rik), mRNA,
ILMN_2627217	Pi4k2b	148.659	142.182	370.003	267.651	238.746	159.867	0.956427	0.723376	1	0.669611	Mus musculus phosphatidylinositol 4-kinase type 2 beta (Pi4k2b), transcript variant 2, mRNA,	4933409G22Rik; 2610042N09Rik
ILMN_1222228	Parp1	104.226	75.9507	210.118	123.015	168.851	113.073	0.72871	0.585456	1	0.669665	Mus musculus poly (ADP-ribose) polymerase family, member 1 (Parp1), mRNA,	C80510; Adprp; sPARP-1; PARP; AI893648; Adprt1; 5830444G22Rik; PPOL; parp-1
ILMN_2747677	2310003L22Rik	141.412	80.1308	197.252	115.652	137.37	92.0015	0.566648	0.586315	1	0.669734	Mus musculus RIKEN cDNA 2310003L22 gene (2310003L22Rik), mRNA,
ILMN_1259794	Rnaseh2c	198.308	199.503	153.934	206.512	257.001	172.141	1.00603	1.34156	1	0.669808	Mus musculus ribonuclease H2, subunit C (Rnaseh2c), mRNA,	1500026D16Rik; AYP1
ILMN_2761472	Lrpap1	32.9157	37.1853	22.0073	23.7796	44.5691	29.8711	1.12972	1.08053	1	0.670219	Mus musculus low density lipoprotein receptor-related protein associated protein 1 (Lrpap1), mRNA,	AA617339; AU042172; RAP; HBP44; C77774; AI790446
ILMN_2622983	Dusp1	55.3203	116.17	95.2607	147.969	88.0275	59.0245	2.09996	1.55331	1	0.670523	Mus musculus dual specificity phosphatase 1 (Dusp1), mRNA,	erp; mkp-1; Ptpn16; U19515; 3CH134
ILMN_1238928	Gbl	247.909	293.822	480.336	469.958	261.798	175.574	1.1852	0.978396	1	0.670647	Mus musculus G protein beta subunit-like (Gbl), mRNA,	0610033N12Rik; AI851821; AA409454; AI505104
ILMN_2993455	Nedd1	154.701	269.622	368.441	489.302	203.68	136.604	1.74286	1.32803	1	0.670681	Mus musculus neural precursor cell expressed, developmentally down-regulated gene 1 (Nedd1), mRNA,
ILMN_1253876	Seh1l	29.1091	29.2899	52.7175	52.995	31.3161	21.0061	1.00621	1.00526	1	0.670777	Mus musculus SEH1-like (S, cerevisiae (Seh1l), transcript variant 2, mRNA,	Seh1; SEH1A; SEH1B; 2610007A16Rik; SEC13L; AW540070
ILMN_1216412	Xrcc6	81.4719	57.9981	532.046	335.015	185.846	124.683	0.711879	0.629673	1	0.670897	Mus musculus X-ray repair complementing defective repair in Chinese hamster cells 6 (Xrcc6), mRNA,	70kDa; Ku70; G22p1
ILMN_2607297	Mon1a	114.476	81.8952	143.682	91.1066	98.5783	66.1545	0.71539	0.634085	1	0.671086	Mus musculus MON1 homolog A (yeast) (Mon1a), mRNA,	2810468K17Rik
ILMN_2698392	Banf1	1269.09	946.463	1220.67	971.909	1566.73	1051.65	0.74578	0.796209	1	0.671237	Mus musculus barrier to autointegration factor 1 (Banf1), transcript variant 2, mRNA,	Bcrp1; Baf; L2bp1/Baf; C78287
ILMN_2685125	Derl2	89.3689	83.8457	129.859	117.183	88.9506	59.7106	0.938197	0.902381	1	0.671279	Mus musculus Der1-like domain family, member 2 (Derl2), mRNA,	Derlin-2; Flana; RP23-83I13,8; CGI-101; F-lana; MGC11613; BC005682
ILMN_2855397	Hgs	126.461	227.545	89.6208	105.004	93.5187	62.7779	1.79933	1.17165	1	0.671286	Mus musculus HGF-regulated tyrosine kinase substrate (Hgs), mRNA,	Hrs; Hgr; ZFYVE8
ILMN_2927643	1700067K01Rik	59.8976	47.0802	66.4427	30.3457	52.2268	35.0623	0.786012	0.45672	1	0.671347	Mus musculus RIKEN cDNA 1700067K01 gene (1700067K01Rik), mRNA,
ILMN_2628647	Ddc	23.982	23.6016	27.7402	28.3476	29.116	19.5498	0.984139	1.0219	1	0.671447
ILMN_3162754	Sars2	54.6831	67.6697	72.4432	60.8363	51.3374	34.4731	1.23749	0.839779	1	0.671501	Mus musculus seryl-aminoacyl-tRNA synthetase 2 (Sars2), mRNA,	D7Ertd353e; 2410015F05Rik; SerRSmt
ILMN_2631144	Tor1a	66.1105	62.6628	122.589	115.904	83.6465	56.1824	0.947849	0.945467	1	0.671665	Mus musculus torsin family 1, member A (torsin A) (Tor1a), mRNA,	Dyt1; torsinA; MGC18883; DQ2
ILMN_2686745	Rgs12	48.5152	42.2912	30.0572	31.5498	53.83	36.159	0.87171	1.04966	1	0.671725	Mus musculus regulator of G-protein signaling 12 (Rgs12), mRNA,	1200016K18Rik; AI481290; E130309H11; 4632412M04Rik
ILMN_1227627	Rnf141	65.6939	72.2091	78.7048	83.8009	75.8458	50.9497	1.09918	1.06475	1	0.671754
ILMN_2626143	Phpt1	860.028	1166.69	684.055	1210.55	795.8	534.963	1.35657	1.76967	1	0.672233	Mus musculus phosphohistidine phosphatase 1 (Phpt1), mRNA,	1700008C22Rik; Php14
ILMN_2727911	Gmip	321.697	196.613	226.785	93.1274	204.779	137.662	0.611175	0.410642	1	0.672248	Mus musculus Gem-interacting protein (Gmip), mRNA,	5031419I10Rik
ILMN_1227131	Ehbp1l1	104.89	65.5076	65.3019	45.6254	71.2953	47.9289	0.624534	0.698684	1	0.672259	Mus musculus EH domain binding protein 1-like 1 (Ehbp1l1), mRNA,	G430002G23Rik
ILMN_1231500	Nusap1	27.3552	27.069	65.4503	68.2963	37.6993	25.3506	0.989537	1.04348	1	0.672442	Mus musculus nucleolar and spindle associated protein 1 (Nusap1), transcript variant 2, mRNA,	LNP; SAPL; BB165529; 2610201A12Rik; NuSAP; BM037; AI481307; Q0310; ANKT; AW547774
ILMN_1235689	Wdr37	30.0309	25.446	66.7561	47.7216	40.2541	27.0707	0.847327	0.714865	1	0.672495	Mus musculus WD repeat domain 37 (Wdr37), transcript variant 3, mRNA,	4933417A01Rik; mKIAA0982; AI481191; 3110035P10Rik; 6430603N07
ILMN_2621471	1110007L15Rik	866.84	674.426	1111.34	968.722	656.313	441.43	0.778028	0.871668	1	0.67259	Mus musculus RIKEN cDNA 1110007L15 gene (1110007L15Rik), mRNA,	AW412535
ILMN_3160507	Acy1l2	34.2864	41.8883	38.7034	71.7136	32.2767	21.7095	1.22172	1.8529	1	0.672606	Mus musculus aminoacylase 1-like 2 (Acy1l2), mRNA,	Gm424
ILMN_2675523	Slc25a30	37.6529	56.8193	67.1863	105.628	54.2752	36.5069	1.50903	1.57217	1	0.672626	Mus musculus solute carrier family 25, member 30 (Slc25a30), mRNA,	AW319655; 4933433D23Rik; KMCP1
ILMN_2745954	1110007L15Rik	616.506	402.339	867.614	592.234	517.532	348.11	0.652611	0.682601	1	0.672636	Mus musculus RIKEN cDNA 1110007L15 gene (1110007L15Rik), mRNA,	AW412535
ILMN_2876579	Ubxn6	137.512	177.34	140.339	220.571	93.2495	62.7257	1.28963	1.5717	1	0.672666	Mus musculus UBX domain protein 6 (Ubxn6), mRNA,	Ubxdc2; 2210415J11Rik; AU040909; 1200008L11Rik
ILMN_2484918	Vti1a	235.186	231.63	200.045	171.876	157.381	105.869	0.984882	0.859185	1	0.672693	Mus musculus vesicle transport through interaction with t-SNAREs homolog 1A (yeast) (Vti1a), mRNA,	1110014F16Rik; MVti1a; Vti1; MVti1; 1110018K19Rik; MGC102006; 4921537J05Rik; Vti1-rp2
ILMN_2855334	Gusb	1490.7	430.857	2644.55	1444.22	1140.55	767.254	0.28903	0.546113	1	0.672703	Mus musculus glucuronidase, beta (Gusb), mRNA,	Gus-r; Gur; Gus-u; Gut; asd; AI747421; Gus-t; Gus; Gus-s; g
ILMN_2640239	Pqlc3	33.6603	30.2061	59.916	80.9679	53.3761	35.9165	0.89738	1.35136	1	0.672895	Mus musculus PQ loop repeat containing (Pqlc3), mRNA,	C78076; E030024M05Rik
ILMN_2594821	Myg1	283.2	183.242	388.231	282.622	338.432	227.751	0.64704	0.727974	1	0.672961	Mus musculus melanocyte proliferating gene 1 (Myg1), mRNA,	5830429P19Rik; AI325965; Gamm1; 0610023A07Rik; 2810433J21Rik
ILMN_1255301	2410042D21Rik	51.5705	50.5762	248.173	161.36	79.7306	53.6694	0.980719	0.65019	1	0.673133	Mus musculus RIKEN cDNA 2410042D21 gene (2410042D21Rik), mRNA,	AA166487; RP23-208E23,2; AI467442; AA473307
ILMN_1219797	Crls1	86.6249	64.6279	280.285	188.917	135.101	90.9588	0.746067	0.674018	1	0.673264	Mus musculus cardiolipin synthase 1 (Crls1), transcript variant 2, mRNA,	0610009I22Rik; 4930557M15Rik; 5730490M08Rik; RP23-77H16,4
ILMN_2711734	Ndufs8	1723.83	1133.81	1420.08	1015.14	1427.54	961.135	0.657727	0.714844	1	0.673283	Mus musculus NADH dehydrogenase (ubiquinone) Fe-S protein 8 (Ndufs8), mRNA,	TYKY; MGC37950; BC021616; MGC101957
ILMN_2590061	Mutyh	33.2308	30.6934	49.8875	42.5717	45.1911	30.4271	0.923643	0.853355	1	0.6733	Mus musculus mutY homolog (E, coli) (Mutyh), nuclear gene encoding mitochondrial protein, mRNA,	Mutyhbeta; Mutyhc; Myh; Mutyhb; Mutyhalpha; 5730495A01Rik; Mutyha
ILMN_3135991	Ttc37	64.9422	58.286	125.927	79.1278	77.135	51.9351	0.897505	0.628362	1	0.673302	Mus musculus tetratricopeptide repeat domain 37 (Ttc37), mRNA,	mKIAA0372; KIAA0372
ILMN_2711329	Ccdc40	45.4227	27.9704	95.3914	65.7346	48.4609	32.6415	0.61578	0.689104	1	0.673564	Mus musculus coiled-coil domain containing 40 (Ccdc40), mRNA,	B930008I02Rik; RP23-13O17,4; MGC109697
ILMN_2826191	E130309D02Rik	158.268	112.54	165.272	92.7045	118.874	80.07	0.711073	0.560921	1	0.673569	Mus musculus RIKEN cDNA E130309D02 gene (E130309D02Rik), mRNA,	A630028N22
ILMN_1234604	2610036D13Rik	122.269	165.797	95.1795	97.4709	120.519	81.2219	1.356	1.02407	1	0.673933	Mus musculus RIKEN cDNA 2610036D13 gene (2610036D13Rik), mRNA,	RP23-91I20,4; AI449463
ILMN_2881477	Vamp3	589.017	546.019	1318.44	1532.26	558.678	376.55	0.927001	1.16218	1	0.674001	Mus musculus vesicle-associated membrane protein 3 (Vamp3), mRNA,	ceb; VAMP-3; D130027G05Rik
ILMN_1214358	Akt1s1	205.395	240.869	175.623	142.471	146.053	98.4636	1.17271	0.811229	1	0.674165	Mus musculus AKT1 substrate 1 (proline-rich) (Akt1s1), mRNA,	Lobel; PRAS40; AI227026; Lobe; 1110012J22Rik
ILMN_1215305	Kat2b	29.0176	29.7882	43.0867	47.7397	33.1148	22.3253	1.02656	1.10799	1	0.674179	Mus musculus K(lysine) acetyltransferase 2B (Kat2b), mRNA,	A930006P13Rik; AI461839; AW536563
ILMN_3001914	Nfkbia	121.157	219.55	118.791	241.142	183.442	123.718	1.81212	2.02997	1	0.674428	Mus musculus nuclear factor of kappa light polypeptide gene enhancer in B-cells inhibitor, alpha (Nfkbia), mRNA,	Nfkbi; AI462015
ILMN_2478523	Txnl4a	1087.62	799.426	846.232	630.124	889.458	599.998	0.735021	0.744624	1	0.674566	Mus musculus thioredoxin-like 4A (Txnl4a), transcript variant 1, mRNA,	U5-15kDa; U5-15kD; D18Wsu98e; Dim1
ILMN_2442075	Topors	298.59	300.739	865.583	704.599	284.493	191.91	1.0072	0.814017	1	0.674571	Mus musculus topoisomerase I binding, arginine/serine-rich (Topors), mRNA,	p53BP3/LUN; TP53BPL; AW105885; LUN
ILMN_2874064	Wfikkn2	27.2544	30.0695	28.9112	31.7844	30.0125	20.2462	1.10329	1.09938	1	0.674594	Mus musculus WAP, follistatin/kazal, immunoglobulin, kunitz and netrin domain containing 2 (Wfikkn2), mRNA,	MGC130508; Gasp1; RP23-244C22,2; WFIKKNRP; 2610304F08Rik; AY100450
ILMN_2748837	Aco2	962.763	988.246	802.907	873.193	747.109	503.995	1.02647	1.08754	1	0.674594	Mus musculus aconitase 2, mitochondrial (Aco2), nuclear gene encoding mitochondrial protein, mRNA,	D10Wsu183e; Aco-2; Aco3
ILMN_2620510	Mlx	35.4719	37.2224	70.2016	69.8673	44.9766	30.3629	1.04935	0.995238	1	0.675082	Mus musculus MAX-like protein X (Mlx), mRNA,	Tcfl4
ILMN_1225880	Srm	1757.64	623.064	2076.56	889.672	1360.92	918.745	0.354489	0.428436	1	0.675089	Mus musculus spermidine synthase (Srm), mRNA,	SpdSy; AA407669
ILMN_2912170	Trmt2b	86.137	61.2423	147.377	119.783	110.735	74.8012	0.710987	0.812764	1	0.675495	Mus musculus TRM2 tRNA methyltransferase 2 homolog B (S, cerevisiae) (Trmt2b), mRNA,	RP23-162B19,2
ILMN_2830060	Wfdc10	26.8327	27.749	28.1576	29.7193	27.2841	18.4316	1.03415	1.05546	1	0.675543	Mus musculus WAP four-disulfide core domain 10 (Wfdc10), mRNA,
ILMN_2738837	Nif3l1	206.218	98.929	357.167	193.971	173.491	117.267	0.479731	0.543084	1	0.675925	Mus musculus Ngg1 interacting factor 3-like 1 (S, pombe) (Nif3l1), mRNA,	MGC107114; 1110030G24Rik
ILMN_2719266	Nup133	32.4292	33.6359	66.778	49.7019	40.0089	27.047	1.03721	0.744285	1	0.676024	Mus musculus nucleoporin 133 (Nup133), mRNA,	4832420O05Rik
ILMN_2600426	Ccdc94	103.712	121.461	91.8577	77.0615	63.4789	42.9155	1.17114	0.838922	1	0.676059	Mus musculus coiled-coil domain containing 94 (Ccdc94), mRNA,	AI413813; 2900016D05Rik
ILMN_2740494	Ppcs	105.509	89.2414	223.285	166.418	147.563	99.7661	0.845817	0.745318	1	0.676091	Mus musculus phosphopantothenoylcysteine synthetase (Ppcs), mRNA,	6330579B17Rik; AI413471; AI790434; RP23-390M8,3
ILMN_2418222	Zbed4	179.838	132.204	619.104	375.346	239.905	162.22	0.735127	0.606272	1	0.676184	Mus musculus zinc finger, BED domain containing 4 (Zbed4), mRNA,	1700009F06Rik; MGC59429
ILMN_2495939	Usp21	79.9447	74.4341	68.0425	70.3585	82.9038	56.063	0.931069	1.03404	1	0.676242	Mus musculus ubiquitin specific peptidase 21 (Usp21), mRNA,	Usp16; W53272; ESTM28; Usp23
ILMN_2750428	Timm44	405.067	392.853	433.102	363.915	314.345	212.579	0.969846	0.840252	1	0.676261	Mus musculus translocase of inner mitochondrial membrane 44 (Timm44), mRNA,	Tim44; D8Ertd118e; MGC144743; Mimt44; MGC118030; 0710005E20Rik; MGC144744
ILMN_1232468	Clcn1	30.6153	28.3237	28.6573	29.728	36.2948	24.5457	0.925146	1.03736	1	0.676288	Mus musculus chloride channel 1 (Clcn1), mRNA,	nmf355; adr; Clc-1; mto; Clc1; myotonia; MGC124486; SMCC1
ILMN_2694659	Ckap5	300.254	272.606	326.885	242.983	280.693	189.83	0.907919	0.74333	1	0.676289	Mus musculus cytoskeleton associated protein 5 (Ckap5), mRNA,	4930432B04Rik; D730027C18Rik; T25636; 3110043H24Rik; mKIAA0097
ILMN_2705969	Pus1	362.215	220.791	366.083	175.93	290.705	196.614	0.609556	0.480575	1	0.676334	Mus musculus pseudouridine synthase 1 (Pus1), transcript variant 1, mRNA,	mPus1p; MPUS1; A730013B20Rik
ILMN_2607892	Bag4	165.448	104.296	528.127	262.158	199.058	134.641	0.630386	0.496393	1	0.676392	Mus musculus BCL2-associated athanogene 4 (Bag4), mRNA,	SODD; 2410112I15Rik
ILMN_1241976	Ubac1	46.2908	44.3337	177.203	176.552	63.1879	42.7434	0.95772	0.996331	1	0.676449	Mus musculus ubiquitin associated domain containing 1 (Ubac1), mRNA,	Ubadc1; GBDR1; AA407978; Gdbr1; 1110033G07Rik
ILMN_1237761	Stra13	66.6567	54.2247	53.2304	48.498	71.7881	48.5668	0.813492	0.911095	1	0.67653	Mus musculus stimulated by retinoic acid 13 (Stra13), mRNA,
ILMN_1247582	Snrpa	268.983	250.505	801.491	847.156	569.364	385.259	0.931307	1.05698	1	0.676649
ILMN_2928160	Vars	1656.8	1100	1005.93	424.538	1088.73	736.892	0.663931	0.422034	1	0.676836	Mus musculus valyl-tRNA synthetase (Vars), nuclear gene encoding mitochondrial protein, mRNA,	Bat6; G7a; D17H6S56E; Vars2; Bat-6
ILMN_2600198	Aaas	34.681	32.0003	74.1206	50.0508	45.3364	30.6858	0.922705	0.675262	1	0.676848	Mus musculus achalasia, adrenocortical insufficiency, alacrimia (Aaas), mRNA,	ADRACALA; D030041N15Rik; GL003; AAA
ILMN_2599110	Uspl1	577.677	464.32	987.189	761.244	551.204	373.385	0.803772	0.771123	1	0.677399	Mus musculus ubiquitin specific peptidase like 1 (Uspl1), mRNA, XM_900481 XM_900488 XM_900492 XM_900499 XM_900504 XM_905468 XM_919327 XM_919336 XM_919343 XM_919346 XM_919353 XM_919361 XM_919381 XM_919390 XM_919400	E430026A01Rik; D030048C09
ILMN_1224256	Erlin1	101.662	89.6074	238.129	202.49	117.335	79.483	0.881427	0.850336	1	0.677402	Mus musculus ER lipid raft associated 1 (Erlin1), mRNA,	C80197; Keo4; Spfh1; 2810439N09Rik
ILMN_2787238	Hpca	31.2568	30.6921	30.9681	31.8268	35.4263	24.0006	0.981931	1.02773	1	0.677479	Mus musculus hippocalcin (Hpca), mRNA,
ILMN_1233334	Fpgs	44.9066	47.2209	72.5829	59.3745	51.1453	34.6571	1.05154	0.818023	1	0.677621	Mus musculus folylpolyglutamyl synthetase (Fpgs), mRNA,	AA408187
ILMN_1247335	Kctd6	70.4748	108.131	101.74	221.423	96.5942	65.4577	1.53432	2.17635	1	0.677657	Mus musculus potassium channel tetramerisation domain containing 6 (Kctd6), mRNA,	AU044285; 5430433B02Rik
ILMN_2750789	Utp6	175.769	131.69	463.395	223.172	225.007	152.502	0.749223	0.481603	1	0.677766	Mus musculus UTP6, small subunit (SSU) processome component, homolog (yeast) (Utp6), mRNA,	HCA66; MGC25509; RP23-253E9,3; 4732497O03Rik
ILMN_1259226	Galnt12	41.2744	40.4842	216.79	159.286	59.818	40.5454	0.980854	0.734747	1	0.677812	Mus musculus UDP-N-acetyl-alpha-D-galactosamine:polypeptide N-acetylgalactosaminyltransferase 12 (Galnt12), mRNA,	A630062B03Rik; 9130206E10
ILMN_2832219	Cdca3	152.368	111.539	231.699	168.964	243.59	165.12	0.732034	0.72924	1	0.677861	Mus musculus cell division cycle associated 3 (Cdca3), mRNA,	2410005A12Rik; Grcc8; C8; Tome-1
ILMN_2734368	Mon1a	29.586	27.3053	37.4804	29.629	28.4477	19.2841	0.922915	0.790519	1	0.677879	Mus musculus MON1 homolog A (yeast) (Mon1a), mRNA,	2810468K17Rik
ILMN_2463447	Trappc3	72.8315	54.218	148.193	159.342	103.684	70.2883	0.74443	1.07523	1	0.677909	Mus musculus trafficking protein particle complex 3 (Trappc3), mRNA,	Bet3; 1110058K12Rik; AI835942; AU019197
ILMN_2625982	Gps1	34.994	25.619	120.391	41.6569	41.2437	27.9748	0.732099	0.346014	1	0.67828	Mus musculus G protein pathway suppressor 1 (Gps1), mRNA,	MGC7191; R75577; MGC118012; COPS1; Csn1
ILMN_1247915	Trim37	30.1549	25.0718	59.0723	29.852	36.7229	24.9099	0.831434	0.505347	1	0.678319	Mus musculus tripartite motif-containing 37 (Trim37), mRNA,	TEF3; AU043018; mKIAA0898; AI848587; MUL; 1110032A10Rik; 2810004E07Rik
ILMN_2643159	Sirt1	98.0185	179.769	314.4	447.583	148.783	100.926	1.83403	1.42361	1	0.678343	Mus musculus sirtuin 1 (silent mating type information regulation 2, homolog) 1 (S, cerevisiae) (Sirt1), mRNA,	Sir2; Sir2a; AA673258; Sir2alpha; SIR2L1
ILMN_2636685	Mcph1	38.9302	35.2142	62.3128	36.7201	53.6896	36.4253	0.904547	0.589287	1	0.678442	Mus musculus microcephaly, primary autosomal recessive 1 (Mcph1), mRNA,	MCT; D030046N04Rik; BRIT1; 5430437K10Rik; MGC66518
ILMN_2792268	Tirap	138.818	82.6028	155.424	80.6659	165.842	112.515	0.595044	0.519006	1	0.67845	Mus musculus toll-interleukin 1 receptor (TIR) domain-containing adaptor protein (Tirap), mRNA,	C130027E04Rik; Tlr4ap; AA407980; wyatt; Mal
ILMN_2782663	Lsm14b	36.1451	39.2045	72.7518	55.502	56.8935	38.6026	1.08464	0.762896	1	0.678507	Mus musculus LSM14 homolog B (SCD6, S, cerevisiae) (Lsm14b), mRNA,	BC040823; 9430078B04
ILMN_2459858	Upf3a	160.983	253.165	157.851	226.178	128.46	87.1794	1.57262	1.43286	1	0.678649	Mus musculus UPF3 regulator of nonsense transcripts homolog A (yeast) (Upf3a), mRNA,	UPF3; RENT3A; 4930546M19Rik; 2600001C03Rik; MGC151365
ILMN_1234766	Ppme1	454.351	504.552	940.709	1474.02	596.236	405.008	1.11049	1.56692	1	0.679274	Mus musculus protein phosphatase methylesterase 1 (Ppme1), mRNA,	2700017M01Rik; Pme1; 1110069N17Rik
ILMN_2942573	Gipc1	57.9973	59.8399	98.096	196.289	86.2289	58.5806	1.03177	2.00099	1	0.679362	Mus musculus GIPC PDZ domain containing family, member 1 (Gipc1), mRNA,	TIP-2; Rgs19ip1; Semcap1; TaxIP2; GIPC; Glut1CIP
ILMN_1229589	Coq6	45.5126	40.748	110.429	99.103	86.9816	59.0968	0.895312	0.89744	1	0.679417	Mus musculus coenzyme Q6 homolog (yeast) (Coq6), mRNA,	AW742344; 5930427M12Rik
ILMN_2634317	Slc1a3	24.1538	24.6414	26.8913	25.4206	33.2815	22.6124	1.02019	0.945309	1	0.679428	Mus musculus solute carrier family 1 (glial high affinity glutamate transporter), member 3 (Slc1a3), mRNA,	MGluT1; B430115D02Rik; Eaat1; GluT-1; GLAST; GLAST-1; AI504299; Gmt1; GLU-T
ILMN_2885348	Mepce	51.4969	72.7439	54.7265	55.4132	43.5034	29.5599	1.41259	1.01255	1	0.679485	Mus musculus methylphosphate capping enzyme (Mepce), mRNA,	MGC28888; Bcdin3; D5Wsu46e; MGC30590
ILMN_3087593	Gtf2a1	50.4105	65.6144	59.7628	63.4403	42.7218	29.0502	1.3016	1.06153	1	0.679985	Mus musculus general transcription factor II A, 1 (Gtf2a1), transcript variant 1, mRNA,	TfIIAa/b; AA536742
ILMN_2613636	Col4a3bp	67.5856	105.886	105.077	152.966	47.6146	32.3905	1.5667	1.45575	1	0.680265	Mus musculus collagen, type IV, alpha 3 (Goodpasture antigen) binding protein (Col4a3bp), mRNA,	2810404O15Rik; GPBP; AU016711; 9230101K08Rik; CERT
ILMN_2781805	Egln2	82.1777	80.6785	86.0294	81.5235	69.7361	47.4497	0.981757	0.947623	1	0.680418	Mus musculus EGL nine homolog 2 (C, elegans) (Egln2), mRNA,	Phd1; C85656; MGC101954; SM-20; Ier4; 0610011A13Rik
ILMN_2759954	Ppp1r2	226.338	185.458	664.629	605.735	352.009	239.525	0.819387	0.911388	1	0.680453	Mus musculus protein phosphatase 1, regulatory (inhibitor) subunit 2 (Ppp1r2), mRNA,	0610025N14Rik; IPP-2; 4930440J04Rik; 2310007G06Rik; 5430408E15Rik; D16Ertd248e
ILMN_2420505	Vps16	56.9139	72.871	110.137	124.221	84.7435	57.6727	1.28037	1.12788	1	0.680556	Mus musculus vacuolar protein sorting 16 (yeast) (Vps16), mRNA,	MGC7352; 1810074M16Rik
ILMN_2817021	Alg10b	48.0459	61.9884	121.469	118.545	51.6015	35.1217	1.29019	0.975921	1	0.680634	Mus musculus asparagine-linked glycosylation 10 homolog B (yeast, alpha-1,2-glucosyltransferase) (Alg10b), mRNA, XM_922905	AA469671; Gm917; AU045404; C85569; AW123895
ILMN_1238509	Hmgb2l1	214.71	213.472	455.434	607.852	381.759	259.853	0.994231	1.33467	1	0.680672	Mus musculus high mobility group box 2-like 1 (Hmgb2l1), mRNA,	4733401K04Rik; AI316803; E430025G12
ILMN_1246790	Chd1	104.516	85.7247	361.254	192.74	134.68	91.674	0.820204	0.533532	1	0.680681	Mus musculus chromodomain helicase DNA binding protein 1 (Chd1), mRNA,	AI851787; AW555109; MGC141554; 4930525N21Rik
ILMN_2639375	Map2k5	146.458	89.0282	140.471	111.004	112.708	76.7225	0.607874	0.790233	1	0.68072	Mus musculus mitogen-activated protein kinase kinase 5 (Map2k5), mRNA,	Prkmk5; AI324775; AI428457; MEK5; Mapkk5
ILMN_1221363	Orc5l	329.955	296.508	673.546	403.659	390.34	265.736	0.898631	0.599304	1	0.680782	Mus musculus origin recognition complex, subunit 5-like (S, cerevisiae) (Orc5l), mRNA,	Orc5; MmORC5; AL033327
ILMN_1230221	2310037I24Rik	43.3145	41.4448	179.866	99.7971	85.5416	58.2419	0.956835	0.554841	1	0.680861	Mus musculus RIKEN cDNA 2310037I24 gene (2310037I24Rik), mRNA,	MGC101985; B930009D17; MGC102368
ILMN_2902575	Col4a3bp	57.9895	95.7102	99.8416	153.143	44.7186	30.4521	1.65048	1.53385	1	0.680971	Mus musculus collagen, type IV, alpha 3 (Goodpasture antigen) binding protein (Col4a3bp), mRNA,	2810404O15Rik; GPBP; AU016711; 9230101K08Rik; CERT
ILMN_1225035	Carhsp1	145.988	347.642	164.017	595.498	197.85	134.74	2.38131	3.63071	1	0.681024	Mus musculus calcium regulated heat stable protein 1 (Carhsp1), mRNA,	MGC101919; Crhsp-24; 1200011K09Rik; D16Ertd465e
ILMN_2588254	Eif4a3	1459.62	902.562	2217.32	1484.76	1525.88	1039.23	0.618356	0.669616	1	0.681072	Mus musculus eukaryotic translation initiation factor 4A, isoform 3 (Eif4a3), mRNA,	mKIAA0111; MGC6715; MGC6664; Ddx48; 2400003O03Rik
ILMN_1241785	Larp2	32.9833	40.3358	96.8391	95.024	45.472	30.9805	1.22291	0.981257	1	0.68131	Mus musculus La ribonucleoprotein domain family, member 2 (Larp2), mRNA,	4933421B21Rik; MGC117760; FLJ10378; AA690246; MGC38253; 1700108L22Rik
ILMN_3046846	Rps27a	2065.86	977.098	2488.17	1745.83	2530.59	1724.92	0.472973	0.701653	1	0.681627	Mus musculus ribosomal protein S27a (Rps27a), transcript variant 2, mRNA,	0610006J14Rik
ILMN_2958382	Chd1	79.9729	71.1188	293.498	154.501	91.1465	62.1382	0.889286	0.526412	1	0.68174	Mus musculus chromodomain helicase DNA binding protein 1 (Chd1), mRNA,	AI851787; AW555109; MGC141554; 4930525N21Rik
ILMN_2957904	Ufsp2	165.661	145.263	522.618	482.454	296.622	202.226	0.876865	0.923149	1	0.681763	Mus musculus UFM1-specific peptidase 2 (Ufsp2), mRNA,	Ufsp2; MGC7482
ILMN_1225831	Vps72	92.1517	134.806	67.8916	60.9337	88.6965	60.4764	1.46287	0.897514	1	0.681836	Mus musculus vacuolar protein sorting 72 (yeast) (Vps72), mRNA,	Tcfl1; YL-1
ILMN_1250738	Pask	25.9764	27.945	47.7641	36.1551	30.5534	20.8327	1.07578	0.756952	1	0.681844	Mus musculus PAS domain containing serine/threonine kinase (Pask), mRNA,	mKIAA0135
ILMN_2709083	Edn3	27.2554	20.7996	28.3748	25.9643	27.4554	18.7212	0.763136	0.915048	1	0.681879	Mus musculus endothelin 3 (Edn3), mRNA,	ls
ILMN_2703204	2310061C15Rik	95.369	104.52	114.071	125.999	109.512	74.678	1.09595	1.10457	1	0.681916	Mus musculus RIKEN cDNA 2310061C15 gene (2310061C15Rik), mRNA,	1110046L09Rik; DC13
ILMN_1226133	Dgcr8	165.738	171.093	191.211	157.653	123.662	84.3496	1.03231	0.824497	1	0.682096	Mus musculus DiGeorge syndrome critical region gene 8 (Dgcr8), mRNA,	D16H22S1742E; D16H22S788E; Gy1; N41; D16Wis2
ILMN_2457326	Tssc1	47.4397	39.1521	109.272	92.6627	69.6592	47.5228	0.825302	0.848002	1	0.682219	Mus musculus tumor suppressing subtransferable candidate 1 (Tssc1), mRNA,	D12Ertd604e
ILMN_2979430	Thg1l	123.421	90.6212	277.631	168.184	159.976	109.143	0.734246	0.605783	1	0.682249	Mus musculus tRNA-histidine guanylyltransferase 1-like (S, cerevisiae) (Thg1l), mRNA,	AA387658; 5730409G07Rik; RP23-298M7,6; 1700121M19Rik; MGC107321
ILMN_2516844	V1ri9	25.8536	26.1948	25.9698	23.6241	26.2565	17.9153	1.0132	0.909678	1	0.682318	Mus musculus vomeronasal 1 receptor, I9 (V1ri9), mRNA,
ILMN_2614895	Nus1	498.36	356.956	940.176	592.986	361.161	246.485	0.716262	0.630718	1	0.682478	Mus musculus nuclear undecaprenyl pyrophosphate synthase 1 homolog (S, cerevisiae) (Nus1), mRNA,	D10Ertd438e; AW538011; 1600027K07Rik; MGC7199; AU019165; BC003223
ILMN_3133095	Slc35f2	55.8979	34.6085	298.264	104.327	97.0003	66.2196	0.619139	0.34978	1	0.682674	Mus musculus solute carrier family 35, member F2 (Slc35f2), mRNA,	AU019213; 1500009K05Rik
ILMN_2505307	Yme1l1	42.3687	40.6473	402.293	396.476	124.628	85.0874	0.959371	0.985542	1	0.682733	Mus musculus YME1-like 1 (S, cerevisiae) (Yme1l1), nuclear gene encoding mitochondrial protein, mRNA,	FtsH1; Ftsh
ILMN_2662763	Exo1	28.4061	27.7395	76.3773	32.0499	30.1825	20.607	0.976531	0.419626	1	0.682747	Mus musculus exonuclease 1 (Exo1), mRNA,	Msa
ILMN_2710274	Slc9a3r2	41.9467	41.2425	65.1538	65.5628	41.1578	28.1032	0.983211	1.00628	1	0.682817	Mus musculus solute carrier family 9 (sodium/hydrogen exchanger), member 3 regulator 2 (Slc9a3r2), transcript variant A, mRNA,	0610011L07Rik; NHERF-2; 2010007A20Rik; 1200011K07Rik; Sip-1; Octs2; Tka-1; E3karp
ILMN_2600202	Dhx33	208.063	225.883	572.297	373.796	260.961	178.19	1.08565	0.65315	1	0.682824	Mus musculus DEAH (Asp-Glu-Ala-His) box polypeptide 33 (Dhx33), mRNA,	3110057P17Rik; 9430096J02Rik; Ddx33
ILMN_1255422	Ccrn4l	332.445	369.339	940.696	556.579	397.332	271.327	1.11098	0.591667	1	0.682873	Mus musculus CCR4 carbon catabolite repression 4-like (S, cerevisiae) (Ccrn4l), mRNA,	Ccr4; nocturnin; AU043840
ILMN_2991534	Cdc27	56.9902	51.1851	86.9635	73.566	47.4561	32.4071	0.898139	0.845941	1	0.682886	Mus musculus cell division cycle 27 homolog (S, cerevisiae) (Cdc27), mRNA, XM_001000657 XM_001000666 XM_001000677 XM_001000684 XM_001000693 XM_001000711 XM_001004163 XM_895207 XM_903089 XM_903091-XM_903097 XM_911095 XM_921895 XM_921914 XM_921924 XM_921931 XM_921943 XM_921947 XM_921951 XM_984141	APC3; BC023187; AI452358
ILMN_2764883	Mafg	247.566	244.791	480.118	352.223	196.723	134.339	0.988793	0.733618	1	0.682886	Mus musculus v-maf musculoaponeurotic fibrosarcoma oncogene family, protein G (avian) (Mafg), mRNA,	C630022N07Rik; AA545192
ILMN_2804622	Med25	548.632	514.208	935.254	1167.5	443.226	302.701	0.937256	1.24832	1	0.68295	Mus musculus mediator of RNA polymerase II transcription, subunit 25 homolog (yeast) (Med25), mRNA,	2610529E18Rik; X83308; ESTM2; 2610034E13Rik
ILMN_2613841	Sf3a3	1564.3	896.054	2873.44	1865.08	1562.67	1067.28	0.572813	0.649074	1	0.682984	Mus musculus splicing factor 3a, subunit 3 (Sf3a3), mRNA, XM_983572 XM_992567 XM_992590 XM_992606	60kDa; MGC103282; 4930512K19Rik
ILMN_2775891	Ilf2	1800.95	1965.93	2940.57	2378.94	1539.03	1051.24	1.09161	0.809004	1	0.683055	Mus musculus interleukin enhancer binding factor 2 (Ilf2), mRNA,	Tex261; 6230405A16Rik; Tex267; TEG-267
ILMN_2606567	Atic	132.435	77.9628	370.149	168.368	167.355	114.32	0.588687	0.454866	1	0.683095	Mus musculus 5-aminoimidazole-4-carboxamide ribonucleotide formyltransferase/IMP cyclohydrolase (Atic), mRNA,	AA536954; AW212393; 2610509C24Rik
ILMN_2603593	Thap1	48.3906	45.6817	69.054	53	54.3264	37.1282	0.944019	0.767515	1	0.683429	Mus musculus THAP domain containing, apoptosis associated protein 1 (Thap1), mRNA,	4833431A01Rik
ILMN_3041839	Pdhb	596.613	586.215	2133.02	2650.22	1303.78	891.284	0.982572	1.24247	1	0.683615	Mus musculus pyruvate dehydrogenase (lipoamide) beta (Pdhb), mRNA,	2610103L06Rik; AL024199; C81408
ILMN_2948476	Gjb1	33.137	34.2223	27.1671	23.2642	30.2859	20.7051	1.03275	0.85634	1	0.683656	Mus musculus gap junction protein, beta 1 (Gjb1), mRNA,	Cx32; Gjb-1; MGC6217; Cnx32; AI118175
ILMN_2954265	Rassf1	116.432	119.381	274.172	158.692	143.488	98.114	1.02533	0.578802	1	0.683776	Mus musculus Ras association (RalGDS/AF-6) domain family member 1 (Rassf1), mRNA,	Rassf1A; REH3P21; Rassf1B; RDA32; AA536941; 123F2; NORE2A; Rassf1C; AU044980
ILMN_3158909	Banf1	2384.3	1642.55	2242.52	1856.04	2550.22	1743.94	0.6889	0.827657	1	0.683838	Mus musculus barrier to autointegration factor 1 (Banf1), transcript variant 2, mRNA,	Bcrp1; Baf; L2bp1/Baf; C78287
ILMN_1229720	Tollip	42.8655	46.976	115.929	108.523	69.1781	47.3182	1.09589	0.936116	1	0.684005	Mus musculus toll interacting protein (Tollip), mRNA,	4930403G24Rik; 4931428G15Rik
ILMN_2776271	A730042J05Rik	98.9248	83.0372	133.674	116.405	91.2121	62.3946	0.839397	0.870812	1	0.68406
ILMN_2660471	Dhcr7	75.5928	61.0365	109.707	78.2888	71.8335	49.1429	0.807437	0.713617	1	0.684122	Mus musculus 7-dehydrocholesterol reductase (Dhcr7), mRNA,	AA409147
ILMN_2947187	Psme4	1304.39	1185.64	1742.26	2366.74	1297.75	887.957	0.908964	1.35843	1	0.68423	Mus musculus proteasome (prosome, macropain) activator subunit 4 (Psme4), mRNA,	AA409398; TEMO; AU041366; KIAA0077; mKIAA0077
ILMN_2607313	Fkrp	41.0427	39.4767	56.1725	61.516	46.774	32.01	0.961843	1.09513	1	0.684353	Mus musculus fukutin related protein (Fkrp), mRNA,	AI847300; A830029B19Rik; AI842067; MDC1C; LGMD1I
ILMN_2945095	Tnfrsf10b	57.5154	69.0189	101.112	134.682	97.1731	66.5037	1.20001	1.332	1	0.684384	Mus musculus tumor necrosis factor receptor superfamily, member 10b (Tnfrsf10b), mRNA,	Ly98; TRAILR2; TRICK2A; MK; KILLER; TRICKB; TRAIL-R2; DR5; TRICK2B; Killer/Dr5
ILMN_2820098	Med19	68.4601	68.7233	137.854	106.647	76.8159	52.5787	1.00384	0.773619	1	0.684476	Mus musculus mediator of RNA polymerase II transcription, subunit 19 homolog (yeast) (Med19), mRNA,	LCMR1; DKFZp586K0524; 2410018M14Rik
ILMN_3002095	Il27ra	30.5259	31.705	25.0714	27.6367	33.2376	22.753	1.03863	1.10232	1	0.684556	Mus musculus interleukin 27 receptor, alpha (Il27ra), mRNA,	Tccr; WSX-1; IL-27R; zcytor1; Wsx1; CRL1
ILMN_2968676	Timm44	331.855	345.254	365.476	299.772	280.954	192.364	1.04038	0.820223	1	0.684682	Mus musculus translocase of inner mitochondrial membrane 44 (Timm44), mRNA,	Tim44; D8Ertd118e; MGC144743; Mimt44; MGC118030; 0710005E20Rik; MGC144744
ILMN_2945238	Prdm4	281.152	200.384	551.155	315.357	279.907	191.655	0.712724	0.572174	1	0.684707	Mus musculus PR domain containing 4 (Prdm4), mRNA,	SC-1; 1700031E19Rik; 2810470D21Rik; AW552272
ILMN_2850849	Cog1	88.6226	79.5534	75.1298	56.7693	70.5825	48.3304	0.897665	0.755616	1	0.684735	Mus musculus component of oligomeric golgi complex 1 (Cog1), mRNA,	Ldlb; KIAA1381; mKIAA1381; 6030445I15
ILMN_2479666	Uck1	42.5102	34.0583	101.847	113.179	66.9349	45.8463	0.801179	1.11127	1	0.684939	Mus musculus uridine-cytidine kinase 1 (Uck1), mRNA,	URK1; Umpk
ILMN_2745540	Cnot7	271.705	242.334	760.18	540.548	448.734	307.357	0.891899	0.711078	1	0.684942	Mus musculus CCR4-NOT transcription complex, subunit 7 (Cnot7), mRNA,	Pop2; Caf1; AU022737
ILMN_3033524	Ccdc93	47.7009	48.1506	56.504	46.7186	34.9974	23.9744	1.00943	0.826819	1	0.685032	Mus musculus coiled-coil domain containing 93 (Ccdc93), transcript variant 1, mRNA,	9230102M16Rik; 4633402D15Rik
ILMN_1236459	Paox	108.885	77.1675	90.313	56.8881	100.157	68.6176	0.708707	0.629899	1	0.685101	Mus musculus polyamine oxidase (exo-N4-amino) (Paox), mRNA,	AI118225; 2410012F02Rik; Pao
ILMN_2844784	Vps35	244.132	240.412	633.414	797.6	345.298	236.606	0.984763	1.25921	1	0.685223	Mus musculus vacuolar protein sorting 35 (Vps35), mRNA,	AI647796; Mem3
ILMN_1257110	Gtf3c6	41.527	30.1743	60.7063	32.6307	40.6225	27.8425	0.726619	0.537517	1	0.685396	Mus musculus general transcription factor IIIC, polypeptide 6, alpha (Gtf3c6), mRNA,	2410016F19Rik; AU019813
ILMN_2687661	Mfng	327.209	124.973	1583.91	649.57	382.69	262.39	0.381935	0.410106	1	0.685645	Mus musculus MFNG O-fucosylpeptide 3-beta-N-acetylglucosaminyltransferase (Mfng), mRNA,	AW546563
ILMN_2673121	Sigirr	125.211	40.7865	147.372	76.2128	110.241	75.5867	0.325741	0.517147	1	0.685647	Mus musculus single immunoglobulin and toll-interleukin 1 receptor (TIR) domain (Sigirr), mRNA,	AI256711; TIR8; MGC102426
ILMN_2768984	Anln	38.7852	35.8271	39.6083	32.571	29.8567	20.4713	0.923732	0.822327	1	0.685652	Mus musculus anillin, actin binding protein (Anln), mRNA,	2900037I21Rik; Scraps; ANILLIN; C78101; 1110037A17Rik
ILMN_2859978	Papss1	253.755	447.335	462.339	900.52	443.236	303.906	1.76286	1.94775	1	0.685654	Mus musculus 3'-phosphoadenosine 5'-phosphosulfate synthase 1 (Papss1), mRNA,	SK1; AI325286; Asapk
ILMN_2918479	Hspa8	1772.42	1607.67	10305	8965.63	4943.24	3389.56	0.90705	0.870027	1	0.685696	Mus musculus heat shock protein 8 (Hspa8), mRNA,	MGC106514; MGC102007; Hsc70; 2410008N15Rik; MGC118485; Hsc71; Hspa10; Hsp73; Hsc73
ILMN_2638404	Dclre1b	122.253	126.952	330.931	224.615	158.66	108.809	1.03843	0.678736	1	0.6858	Mus musculus DNA cross-link repair 1B, PSO2 homolog (S, cerevisiae) (Dclre1b), transcript variant 1, mRNA,	AI452214; mSNM1B
ILMN_1215009	Rabl4	296.315	164.97	199.735	129.723	273.131	187.344	0.55674	0.649475	1	0.68591	Mus musculus RAB, member of RAS oncogene family-like 4 (Rabl4), mRNA,	2600013G09Rik
ILMN_1221895	Nsun5	82.8104	57.7951	232.213	115.083	101.388	69.5438	0.697921	0.495595	1	0.685921	Mus musculus NOL1/NOP2/Sun domain family, member 5 (Nsun5), mRNA,	Wbscr20; AI326939; Nol1r; 9830109N13Rik; Wbscr20a
ILMN_2650547	Hus1	232.036	120.784	551.849	321.48	263.169	180.535	0.520541	0.582551	1	0.686002	Mus musculus Hus1 homolog (S, pombe) (Hus1), mRNA,	mHus1
ILMN_2967622	Gpsm1	84.5436	103.568	131.525	108.99	97.3755	66.8042	1.22503	0.828661	1	0.686047	Mus musculus G-protein signalling modulator 1 (AGS3-like, C, elegans) (Gpsm1), mRNA,	AW107933; 1810037C22Rik; Ags3
ILMN_3125920	Mast2	103.554	116.926	110.299	120.064	83.0367	56.9808	1.12913	1.08853	1	0.686212	Mus musculus microtubule associated serine/threonine kinase 2 (Mast2), transcript variant 2, mRNA,	mKIAA0807; Mtssk; MAST205
ILMN_2895388	Insig1	143.492	209.073	419.594	411.337	227.149	155.898	1.45703	0.98032	1	0.686326	Mus musculus insulin induced gene 1 (Insig1), mRNA,	1810013C12Rik; Insig-1
ILMN_2750258	Mea1	61.8328	56.6418	59.4476	71.5001	56.6939	38.9192	0.916048	1.20274	1	0.686479	Mus musculus male enhanced antigen 1 (Mea1), mRNA,	Mea-1
ILMN_1244879	LOC100046690	24.6316	25.8302	27.4899	24.9543	27.6349	18.9755	1.04866	0.907761	1	0.686649	PREDICTED: Mus musculus hypothetical protein LOC100046690 (LOC100046690), mRNA,
ILMN_1217331	Mcm6	1062.1	624.744	4054.7	2178.63	1358.41	933.193	0.588217	0.537309	1	0.686976	Mus musculus minichromosome maintenance deficient 6 (MIS5 homolog, S, pombe) (S, cerevisiae) (Mcm6), mRNA,	ASP-l1; Mcmd6; D1Wsu22e
ILMN_2697069	Gmnn	33.7108	30.7699	90.6762	40.9419	37.2748	25.607	0.91276	0.451517	1	0.686978
ILMN_3062133	Cpsf1	103.998	82.4882	71.7882	56.2304	87.7411	60.2913	0.793172	0.783282	1	0.687149	Mus musculus cleavage and polyadenylation specific factor 1 (Cpsf1), mRNA,
ILMN_2726174	Ints7	363.256	386.701	605.769	468.652	321.362	220.864	1.06454	0.773647	1	0.687276	Mus musculus integrator complex subunit 7 (Ints7), mRNA,	5930412E23Rik
ILMN_1231930	Tesk1	78.3619	116.314	212.558	452.711	148.082	101.784	1.48432	2.12983	1	0.687348	Mus musculus testis specific protein kinase 1 (Tesk1), mRNA,	AI326901
ILMN_1240806	Myo9a	43.2157	52.3616	76.933	70.171	45.8509	31.5188	1.21163	0.912106	1	0.687419	PREDICTED: Mus musculus myosin IXa, transcript variant 2 (Myo9a), mRNA,
ILMN_3034691	Arl6ip4	533.532	356.945	367.266	296.228	296.202	203.616	0.669023	0.806576	1	0.687422	Mus musculus ADP-ribosylation factor-like 6 interacting protein 4 (Arl6ip4), mRNA,	AA408210; AA408365; Aip-4; Srp25
ILMN_2494397	Ube2j2	63.9773	53.5023	178.507	129.236	90.0944	61.9436	0.83627	0.723984	1	0.687542	Mus musculus ubiquitin-conjugating enzyme E2, J2 homolog (yeast) (Ube2j2), transcript variant 3, mRNA,	Ubc6p; 5730472G04Rik; AL022923; Ubc6; 2400008G19Rik; 1200007B18Rik
ILMN_2939303	Pcyt2	485.478	832.959	443.335	540.559	519.84	357.611	1.71575	1.2193	1	0.687926	Mus musculus phosphate cytidylyltransferase 2, ethanolamine (Pcyt2), mRNA,	ET; 1110033E03Rik
ILMN_2652181	Mast2	269.763	268.938	424.297	472.621	262.193	180.393	0.996944	1.11389	1	0.688013	Mus musculus microtubule associated serine/threonine kinase 2 (Mast2), transcript variant 2, mRNA,	mKIAA0807; Mtssk; MAST205
ILMN_2707088	Zbtb41	52.5626	47.5153	117.132	93.7185	62.0072	42.6624	0.903975	0.80011	1	0.688023	Mus musculus zinc finger and BTB domain containing 41 homolog (Zbtb41), mRNA,	AI316857; 9430031N01; 8430415N23Rik; 9830132G07Rik
ILMN_2964816	2310008H04Rik	42.6656	43.9857	50.9848	47.986	46.4073	31.9391	1.03094	0.941183	1	0.688235	Mus musculus RIKEN cDNA 2310008H04 gene (2310008H04Rik), mRNA,	MGC115787; MGC30630
ILMN_2670230	Tbrg4	126.396	91.7179	187.85	79.8024	119.03	81.9338	0.725641	0.42482	1	0.688345	Mus musculus transforming growth factor beta regulated gene 4 (Tbrg4), mRNA,	Cpr2; TB-12; AA408001; mKIAA0948; AI527316; AA120735; R74877; 2310042P22Rik
ILMN_2952114	Smc1a	461.883	406.033	811.342	596.686	468.178	322.305	0.879081	0.73543	1	0.688424	Mus musculus structural maintenance of chromosomes 1A (Smc1a), mRNA,	SMCB; KIAA0178; mKIAA0178; SB1,8; Smc1l1; Smc1alpha; 5830426I24Rik; Smc1
ILMN_2711782	Tbc1d1	125.661	107.647	125.948	108.312	102.829	70.8034	0.856653	0.859974	1	0.688559	Mus musculus TBC1 domain family, member 1 (Tbc1d1), mRNA,	AI385682; Tbc1; MGC144097; 1110062G02Rik; MGC106104; AW555803; mKIAA1108
ILMN_1233836	Pon2	428.108	242.851	890.141	924.353	409.548	282.02	0.567266	1.03843	1	0.688612	Mus musculus paraoxonase 2 (Pon2), mRNA,	MGC68232; AI481612; 6330405I24Rik
ILMN_2758338	Cant1	48.4159	38.5829	111.016	73.3424	57.7977	39.8118	0.796906	0.660646	1	0.688813
ILMN_2833376	Prkaca	306.89	375.035	474.295	580.814	279.179	192.304	1.22205	1.22458	1	0.688819	Mus musculus protein kinase, cAMP dependent, catalytic, alpha (Prkaca), mRNA,	PKA; Pkaca; PKCD; Cs
ILMN_2918440	Aarsd1	512.183	417.151	662.547	368.869	405.216	279.139	0.814457	0.556744	1	0.688863	Mus musculus alanyl-tRNA synthetase domain containing 1 (Aarsd1), mRNA,	2310044P18Rik; 1110069E20Rik; AA589600
ILMN_2727967	Cep57	67.4227	71.473	214.273	180.165	113.082	77.9355	1.06007	0.840821	1	0.689192	Mus musculus centrosomal protein 57 (Cep57), mRNA,	4931428M20Rik; 4921510P06Rik; 3110002L15Rik; AI467480; Tsp57; mKIAA0092
ILMN_2960774	Zfp764	31.8929	28.4573	58.6022	40.9062	39.3745	27.1398	0.892279	0.698032	1	0.689273	Mus musculus zinc finger protein 764 (Zfp764), mRNA,	MGC31213; 8030466O12Rik
ILMN_2792267	Tirap	154.921	79.9795	182.004	92.5468	145.889	100.594	0.516259	0.508488	1	0.689523	Mus musculus toll-interleukin 1 receptor (TIR) domain-containing adaptor protein (Tirap), mRNA,	C130027E04Rik; Tlr4ap; AA407980; wyatt; Mal
ILMN_2982097	Gatad1	66.5623	73.2457	102.235	130.047	75.7529	52.2368	1.10041	1.27203	1	0.689569	Mus musculus GATA zinc finger domain containing 1 (Gatad1), mRNA,	2810047M21Rik; 8430439A17Rik; Odag; B330017N08Rik; 2310031E19Rik
ILMN_2949338	Trerf1	49.6489	41.0483	116.325	81.3449	55.6955	38.4087	0.826773	0.699288	1	0.68962	Mus musculus transcriptional regulating factor 1 (Trerf1), mRNA,	9430096I18Rik; Trep132; Trep-132; MGC118525; RAPA; B830015H24
ILMN_2647435	Rassf1	292.826	289.781	524.278	309.937	349.586	241.085	0.989599	0.591169	1	0.68963	Mus musculus Ras association (RalGDS/AF-6) domain family member 1 (Rassf1), mRNA,	Rassf1A; REH3P21; Rassf1B; RDA32; AA536941; 123F2; NORE2A; Rassf1C; AU044980
ILMN_1256673	Uqcrc1	1950.66	1850.54	2038.09	2193.52	1492.84	1029.53	0.948672	1.07627	1	0.689647	Mus musculus ubiquinol-cytochrome c reductase core protein 1 (Uqcrc1), mRNA,	MGC97899; 1110032G10Rik
ILMN_1237042	LOC100046081	184.429	219.064	192.234	206.111	110.41	76.1577	1.18779	1.07219	1	0.68977	PREDICTED: Mus musculus similar to OTU domain, ubiquitin aldehyde binding 1 (LOC100046081), mRNA,
ILMN_2681592	Ankrd40	171.072	205.598	166.117	214.378	122.897	84.7753	1.20182	1.29053	1	0.689807	Mus musculus ankyrin repeat domain 40 (Ankrd40), transcript variant 1, mRNA,	Gcap15; 5530600A18Rik; MGC29030; RP23-65I14,1; 1110011C06Rik
ILMN_2883907	Lsm8	909.427	572.866	1249.64	1108.98	1108.99	764.988	0.629919	0.887443	1	0.689807	Mus musculus LSM8 homolog, U6 small nuclear RNA associated (S, cerevisiae) (Lsm8), mRNA,	2010003I05Rik; AW214405
ILMN_2636116	Pdcd5	151.106	67.7021	183.12	123.404	205.042	141.475	0.448043	0.673899	1	0.68998
ILMN_2497094	Med4	327.312	297.59	538.865	468.886	339.632	234.417	0.909192	0.870137	1	0.690208	Mus musculus mediator of RNA polymerase II transcription, subunit 4 homolog (yeast) (Med4), mRNA,	HSPC126; 2410046H15Rik; TRAP36; Vdirp; DRIP36; Vdrip
ILMN_2976440	Blk	24.0126	23.6645	28.1153	26.5122	31.546	21.7857	0.985502	0.942984	1	0.690602	Mus musculus B lymphoid kinase (Blk), mRNA,
ILMN_2705078	Csda	292.893	275.119	428.505	273.878	320.564	221.399	0.939316	0.639146	1	0.690656	Mus musculus cold shock domain protein A (Csda), mRNA,	Dpba; dbpA; Yb2; Ybx3; oxyR; MSY4
ILMN_1217590	Sephs2	147.588	92.763	385.851	164.726	196.84	135.954	0.628529	0.426917	1	0.690682	Mus musculus selenophosphate synthetase 2 (Sephs2), mRNA,	Ysg3; Sps2
ILMN_2775655	Akap1	70.4294	78.5319	143.968	131.399	88.2813	60.9783	1.11504	0.91269	1	0.690728	Mus musculus A kinase (PRKA) anchor protein 1 (Akap1), nuclear gene encoding mitochondrial protein, transcript variant 2, mRNA,	C76494; AKAP121; C81186; Akap; AKAP84; S-AKAP84
ILMN_2659644	Map2k3	751.321	888.209	1011.62	1157.84	743.438	513.591	1.1822	1.14454	1	0.690831	Mus musculus mitogen activated protein kinase kinase 3 (Map2k3), mRNA,	MEK3; AW212142; mMKK3b; MKK3; Prkmk3
ILMN_2451389	Dpysl2	34.5797	39.5924	40.0445	41.8008	39.5568	27.3329	1.14496	1.04386	1	0.69098
ILMN_2680540	Impdh1	29.9539	29.5345	50.4214	49.4648	38.5117	26.611	0.985999	0.981027	1	0.690985	Mus musculus inosine 5'-phosphate dehydrogenase 1 (Impdh1), mRNA,	B930086D20Rik
ILMN_1229716	2310036O22Rik	1569.92	1704.94	1024.85	1563.33	1602.35	1107.37	1.08601	1.52542	1	0.691092	Mus musculus RIKEN cDNA 2310036O22 gene (2310036O22Rik), mRNA,	1110002H14Rik; AI854688
ILMN_2607951	Haao	27.7267	20.0952	42.5853	23.1003	40.4964	27.9892	0.724761	0.542449	1	0.691152	Mus musculus 3-hydroxyanthranilate 3,4-dioxygenase (Haao), mRNA, XM_925483 XM_986039 XM_986095 XM_988905 XM_988933 XM_988974	0610007K21Rik; 0610012J07Rik
ILMN_3162618	Luc7l	94.5126	227.992	111.429	118.147	82.2147	56.8262	2.41229	1.06029	1	0.691193	Mus musculus Luc7 homolog (S, cerevisiae)-like (Luc7l), transcript variant 2, mRNA,	1810045C04Rik; 2410018D03Rik
ILMN_2685275	Tmem109	990.917	404.382	2655.76	1297.91	991.54	685.361	0.408089	0.488717	1	0.691208	Mus musculus transmembrane protein 109 (Tmem109), mRNA,	C77652; 1110006I15Rik; AA958958
ILMN_2590837	Tial1	133.78	102.513	317.911	245.48	146.833	101.516	0.766282	0.772163	1	0.691369	Mus musculus Tia1 cytotoxic granule-associated RNA binding protein-like 1 (Tial1), mRNA,	mTIAR; AL033329; 5330433G13Rik
ILMN_2811918	Zfp473	40.5499	35.0057	71.0015	38.2605	47.666	32.9556	0.863275	0.538869	1	0.691386	Mus musculus zinc finger protein 473 (Zfp473), mRNA,	4932441F21; D030014N22Rik
ILMN_2645613	Cc2d1a	114.255	49.6888	198.681	205.668	107.898	74.6284	0.434894	1.03517	1	0.691654	Mus musculus coiled-coil and C2 domain containing 1A (Cc2d1a), mRNA,	MGC27560; BC016188; MGC38983; Freud-1
ILMN_3104094	2610208M17Rik	269.001	201.946	564.319	420.372	401.444	277.749	0.750725	0.744919	1	0.691875	Mus musculus RIKEN cDNA 2610208M17 gene (2610208M17Rik), mRNA,	MGC6869; MGC101949; BC004835
ILMN_3003076	Carm1	131.412	90.4192	105.77	50.2816	133.449	92.3306	0.688061	0.475385	1	0.69188	Mus musculus coactivator-associated arginine methyltransferase 1 (Carm1), mRNA,	MGC46828; Prmt4
ILMN_1247240	Ccdc43	202.779	130.958	508.684	365.627	248.248	171.773	0.645815	0.71877	1	0.691941	Mus musculus coiled-coil domain containing 43 (Ccdc43), mRNA,	2610001E01Rik; D11Ertd707e; RP23-57F11,7
ILMN_2665625	Fadd	67.4685	75.3146	121.416	115.031	63.109	43.6715	1.11629	0.94741	1	0.692001	Mus musculus Fas (TNFRSF6)-associated via death domain (Fadd), mRNA,	Mort1/FADD
ILMN_1234641	6720463M24Rik	220.448	184.553	489.368	262.393	245.554	169.934	0.837173	0.536187	1	0.69204	Mus musculus RIKEN cDNA 6720463M24 gene (6720463M24Rik), mRNA,	AI317232
ILMN_2607926	Kdelr2	286.403	262.293	783.949	742.253	405.054	280.342	0.915815	0.946813	1	0.692111	Mus musculus KDEL (Lys-Asp-Glu-Leu) endoplasmic reticulum protein retention receptor 2 (Kdelr2), mRNA,	1110007A14Rik
ILMN_2590478	Polq	34.7907	32.7326	45.3651	39.5231	44.9203	31.0917	0.940844	0.871221	1	0.692151	Mus musculus polymerase (DNA directed), theta (Polq), mRNA,	A430110D14Rik
ILMN_2498763	Zw10	35.3582	35.0697	68.3738	50.0915	39.4478	27.318	0.991841	0.732612	1	0.692511	Mus musculus ZW10 homolog (Drosophila), centromere/kinetochore protein (Zw10), mRNA,	6330566F14Rik; MmZw10
ILMN_2673211	Pfn1	1058.66	796.741	1581.78	1585.97	1406.29	974.129	0.752595	1.00265	1	0.692693	Mus musculus profilin 1 (Pfn1), mRNA,	Pfn
ILMN_3161263	Fzd5	57.0177	163.146	111.096	246.973	83.8101	58.06	2.86133	2.22307	1	0.692757	Mus musculus frizzled homolog 5 (Drosophila) (Fzd5), transcript variant 1, mRNA,	MGC141642; AI427138; Fz5; 5330434N09Rik
ILMN_3108770	Fbxl10	313.293	271.75	476.479	341.332	292.608	202.71	0.867399	0.716365	1	0.692771	Mus musculus F-box and leucine-rich repeat protein 10 (Fbxl10), transcript variant 3, mRNA,	mKIAA3014; E430001G17; PCCX2; KIAA3014; Fbl10; Cxxc2
ILMN_2765981	Krt26	28.6682	26.7146	26.2432	28.6224	27.6727	19.1709	0.931852	1.09066	1	0.692773	Mus musculus keratin 26 (Krt26), mRNA, XM_903050 XM_903051	Krt25b; 4732407F15Rik
ILMN_2716098	Hsp105	1183.08	814.202	1937.31	1052.67	1038.58	719.693	0.688204	0.543365	1	0.692959
ILMN_2496121	2600001B17Rik	130.174	97.6642	130.206	69.6864	54.6932	37.9127	0.750261	0.535201	1	0.693187
ILMN_1244409	Cmtm4	91.1863	95.5825	219.728	262.873	81.5409	56.5232	1.04821	1.19636	1	0.693189	Mus musculus CKLF-like MARVEL transmembrane domain containing 4 (Cmtm4), mRNA,	D19397; MGC30490; Cklfsf4
ILMN_1252730	Nudt4	275.725	189.297	943.831	479.142	367.038	254.428	0.686545	0.507656	1	0.693193	Mus musculus nudix (nucleoside diphosphate linked moiety X)-type motif 4 (Nudt4), mRNA,	DIPP2alpha; DIPP2beta; HDCMB47P; 4933436C10Rik; DIPP2
ILMN_2648548	Casp7	40.9314	44.9476	76.475	90.1806	60.6185	42.025	1.09812	1.17922	1	0.69327	Mus musculus caspase 7 (Casp7), mRNA,	CMH-1; AI314680; caspase-7; ICE-IAP3; mCASP-7; Mch3
ILMN_2493874	Zdhhc16	280.486	262.938	354.981	251.199	273.466	189.617	0.937437	0.70764	1	0.693384	Mus musculus zinc finger, DHHC domain containing 16 (Zdhhc16), mRNA,	1500015N03Rik; Aph2
ILMN_1237729	LOC100045304	54.2589	47.7196	247.516	100.658	37.954	26.3175	0.87948	0.406671	1	0.693405	PREDICTED: Mus musculus similar to neurofilament protein (LOC100045304), mRNA,
ILMN_1217577	Sfrs12	43.4391	76.5693	50.4675	73.5369	37.0858	25.7203	1.76268	1.45711	1	0.693535	Mus musculus splicing factor, arginine/serine-rich 12 (Sfrs12), mRNA,	AI450757; SRrp508; SRrp86; 8430401B01; AI462342
ILMN_2819530	D15Ertd682e	318.569	236.938	604.651	513.795	404.442	280.562	0.743759	0.849738	1	0.693701	Mus musculus DNA segment, Chr 15, ERATO Doi 682, expressed (D15Ertd682e), mRNA,	2310042P20Rik
ILMN_2903511	Lsm4	4533.12	4862.94	4459.72	5342.07	4573.06	3172.97	1.07276	1.19785	1	0.693839	Mus musculus LSM4 homolog, U6 small nuclear RNA associated (S, cerevisiae) (Lsm4), mRNA,
ILMN_2964608	Zdhhc16	134.2	134.859	173.796	138.194	125.437	87.038	1.00492	0.795147	1	0.693876	Mus musculus zinc finger, DHHC domain containing 16 (Zdhhc16), mRNA,	1500015N03Rik; Aph2
ILMN_2715215	Eif2b5	507.42	383.738	694.516	527.089	431.786	299.619	0.756253	0.75893	1	0.693908	Mus musculus eukaryotic translation initiation factor 2B, subunit 5 epsilon (Eif2b5), mRNA,	C81315
ILMN_1223695	5830415F09Rik	65.492	70.7217	142.296	99.4945	64.9622	45.0854	1.07985	0.69921	1	0.694025	Mus musculus RIKEN cDNA 5830415F09 gene (5830415F09Rik), mRNA, XM_976769	RP23-423O7,7; AV014846
ILMN_2755667	Apbb1ip	118.943	59.9496	145.955	59.2727	81.2013	56.3562	0.504021	0.406103	1	0.69403
ILMN_2828838	Isy1	1263.97	765.893	2375.43	2023.06	1099.17	763.003	0.605942	0.851662	1	0.694164	Mus musculus ISY1 splicing factor homolog (S, cerevisiae) (Isy1), mRNA,	5830446M03Rik; AI181014; AU020769
ILMN_2632832	Adap1	44.1719	27.1339	52.1918	26.7347	33.5151	23.2715	0.614281	0.51224	1	0.694358	Mus musculus ArfGAP with dual PH domains 1 (Adap1), mRNA,	4930431P11Rik; GC1L; p42IP4
ILMN_2733796	Prpsap2	29.4715	29.9717	67.4879	53.1766	37.4306	25.9925	1.01697	0.787942	1	0.694418	Mus musculus phosphoribosyl pyrophosphate synthetase-associated protein 2 (Prpsap2), mRNA,	MGC118451; A230054F23Rik; MGC36957
ILMN_2748806	Wwc2	37.9854	33.0741	34.192	32.281	33.4828	23.2531	0.870704	0.94411	1	0.69448	Mus musculus WW, C2 and coiled-coil domain containing 2 (Wwc2), mRNA,	D8Ertd594e; C85457; AU022508; 5330431C14Rik
ILMN_1257393	Per3	33.2005	37.1161	37.3417	39.4755	38.9664	27.0615	1.11794	1.05714	1	0.694484
ILMN_1213200	Med16	227.992	270.806	298.173	392.75	173.421	120.481	1.18779	1.31719	1	0.69473	Mus musculus mediator complex subunit 16 (Med16), mRNA,	Thrap5; 95kDa; A630083L04; Trap95
ILMN_1252698	Btd	61.8781	81.7498	66.4473	106.653	55.0163	38.234	1.32114	1.60508	1	0.694957	Mus musculus biotinidase (Btd), mRNA,
ILMN_2628178	Socs2	656.598	136.2	405.472	138.603	742.851	516.253	0.207432	0.341832	1	0.694961	Mus musculus suppressor of cytokine signaling 2 (Socs2), mRNA,	D130043N08Rik; hg; Cish2; AI527257; SSI-2; SOCS-2; AW108012; JAB; CIS2; MGC118106; 8030460M17
ILMN_2636755	Asns	34.271	28.0273	185.594	150.977	89.5181	62.2236	0.817815	0.813478	1	0.695095	Mus musculus asparagine synthetase (Asns), mRNA,
ILMN_3163486	Heca	47.9263	58.2653	103.749	157.264	82.3831	57.2651	1.21573	1.51581	1	0.695108	Mus musculus headcase homolog (Drosophila) (Heca), mRNA,	HDC; HDCL; Gm869
ILMN_2896768	Cbr3	1216.96	325.408	1261.36	412.35	1111.1	772.679	0.267393	0.32691	1	0.695416	Mus musculus carbonyl reductase 3 (Cbr3), mRNA,	1110001J05Rik; C81353; MGC99956
ILMN_2695085	Sorcs2	44.6964	31.7719	96.8976	56.7495	92.0354	64.0088	0.710839	0.585665	1	0.695481	Mus musculus sortilin-related VPS10 domain containing receptor 2 (Sorcs2), mRNA,	N28137; mKIAA1329
ILMN_2833378	Prkaca	175.196	226.059	180.845	213.719	168.317	117.08	1.29032	1.18178	1	0.695594	Mus musculus protein kinase, cAMP dependent, catalytic, alpha (Prkaca), mRNA,	PKA; Pkaca; PKCD; Cs
ILMN_2416488	Usp37	41.4334	38.356	59.3839	46.0142	37.914	26.3762	0.925726	0.77486	1	0.695685	Mus musculus ubiquitin specific peptidase 37 (Usp37), mRNA,	4932415L06Rik; C330008N13Rik
ILMN_2764580	Parvg	252.218	77.9883	218.031	101.529	241.866	168.282	0.30921	0.465665	1	0.695767	Mus musculus parvin, gamma (Parvg), mRNA,	AI413459
ILMN_2939071	Casp3	35.4804	29.8322	128.11	92.2612	47.7341	33.2187	0.840807	0.720175	1	0.695912	Mus musculus caspase 3 (Casp3), mRNA,	A830040C14Rik; Apopain; Yama; Lice; CPP32; Caspase-3
ILMN_2767057	3110082I17Rik	168.812	71.5773	308.464	135.513	198.312	138.008	0.424005	0.439315	1	0.695915	Mus musculus RIKEN cDNA 3110082I17 gene (3110082I17Rik), mRNA,	AW411904
ILMN_1239815	Kctd5	112.152	109.887	162.285	176.608	174.121	121.189	0.97981	1.08826	1	0.696003	Mus musculus potassium channel tetramerisation domain containing 5 (Kctd5), mRNA,	2610030N08Rik; mKIAA0176
ILMN_2907473	Tbc1d10a	43.0704	48.8457	45.5157	46.7759	44.2687	30.8135	1.13409	1.02769	1	0.696055	Mus musculus TBC1 domain family, member 10a (Tbc1d10a), mRNA,	FLJ00288; AI447804; Tbc1d10; mFLJ00288; RP23-453B22,5; EPI64
ILMN_2664548	Pgls	2056.8	2093.92	1697.12	2083.4	1991.99	1386.71	1.01805	1.2276	1	0.696145	Mus musculus 6-phosphogluconolactonase (Pgls), mRNA,	1110030K05Rik; Plgs
ILMN_1217302	Smarcc1	40.9407	35.5757	48.2355	29.5035	33.9308	23.6214	0.868957	0.611656	1	0.696164	Mus musculus SWI/SNF related, matrix associated, actin dependent regulator of chromatin, subfamily c, member 1 (Smarcc1), mRNA,	BAF155; AI115498; Rsc8; SRG3
ILMN_2493231	Zswim5	40.4472	38.2142	36.9148	37.2313	37.2717	25.9498	0.944794	1.00857	1	0.696232
ILMN_1225931	D11Moh35	46.0214	43.8709	98.1875	109.085	58.4792	40.7273	0.953271	1.11098	1	0.696441
ILMN_2828427	Llgl1	421.869	609.288	724.544	925.725	441.118	307.239	1.44426	1.27766	1	0.6965	Mus musculus lethal giant larvae homolog 1 (Drosophila) (Llgl1), mRNA,	Mgl1; Llglh; AI325176
ILMN_2693124	Rab1b	134.634	99.5203	264.26	332.983	144.848	100.932	0.739193	1.26006	1	0.696816	Mus musculus RAB1B, member RAS oncogene family (Rab1b), mRNA,	1110011F09Rik
ILMN_2600627	Noc4l	448.394	243.148	455.478	195.303	361.481	251.89	0.542265	0.428788	1	0.696827	Mus musculus nucleolar complex associated 4 homolog (S, cerevisiae) (Noc4l), mRNA,	AI326906; MGC28606
ILMN_2656440	Adck1	64.3301	44.6068	65.6478	51.8807	56.9521	39.6871	0.693406	0.790289	1	0.696851	Mus musculus aarF domain containing kinase 1 (Adck1), mRNA,	2610005A10Rik
ILMN_1243225	Pphln1	34.8686	31.7003	56.836	34.5422	32.2184	22.4581	0.909135	0.607751	1	0.697059	Mus musculus periphilin 1 (Pphln1), transcript variant 1, mRNA,	HSPC206; HSPC232; 1600022A19Rik; MGC27795; 1110063K05Rik
ILMN_2711688	Adssl1	30.3386	32.1211	35.6086	46.2596	39.5493	27.5684	1.05875	1.29911	1	0.697063	Mus musculus adenylosuccinate synthetase like 1 (Adssl1), mRNA,	Adss1; AI528595; Adss
ILMN_1246473	Ccnd3	48.2121	37.7822	96.9864	92.4231	57.3597	39.9934	0.783668	0.952949	1	0.697239	Mus musculus cyclin D3 (Ccnd3), transcript variant 3, mRNA,	AA682053; AW146355; 9230106B05Rik; AL024085; C78795
ILMN_2968032	2010003J03Rik	220.717	93.5477	397.832	156.204	373.304	260.326	0.423835	0.392638	1	0.697358	Mus musculus RIKEN cDNA 2010003J03 gene (2010003J03Rik), mRNA,	AI131644
ILMN_1249698	Wbp2	1179.92	1585.11	2958.05	5394.5	1864.82	1300.52	1.3434	1.82367	1	0.6974	Mus musculus WW domain binding protein 2 (Wbp2), mRNA,
ILMN_1222516	Med8	309.121	174.836	362.518	248.887	296.318	206.653	0.565589	0.68655	1	0.697403	Mus musculus mediator of RNA polymerase II transcription, subunit 8 homolog (yeast) (Med8), transcript variant 1, mRNA,	MNCb-2386; AB041805; 2210021A15Rik; ARC32
ILMN_2643264	Mrpl3	1035.93	608.288	1513.93	1477.66	1009.96	704.371	0.58719	0.97604	1	0.697425	Mus musculus mitochondrial ribosomal protein L3 (Mrpl3), nuclear gene encoding mitochondrial protein, mRNA,	5930422H18Rik; 2010320L16Rik; AA407889
ILMN_2640203	Tsfm	299.285	201.563	443.083	281.491	347.607	242.453	0.673482	0.635301	1	0.697492	Mus musculus Ts translation elongation factor, mitochondrial (Tsfm), nuclear gene encoding mitochondrial protein, mRNA,	2310050B20Rik; 9430024O13Rik; EF-TS; EF-Tsmt
ILMN_2819873	EG432649	23.8414	24.4465	24.4941	27.4789	23.8228	16.6199	1.02538	1.12186	1	0.697647	Mus musculus predicted gene, EG432649 (EG432649), mRNA,
ILMN_1227502	Il15ra	32.3932	27.9504	30.0194	26.777	37.206	25.9587	0.862848	0.891992	1	0.697702	Mus musculus interleukin 15 receptor, alpha chain (Il15ra), transcript variant 2, mRNA,	AA690181
ILMN_2822552	Ubtd2	98.2356	101.245	405.834	327.295	174.965	122.076	1.03064	0.806473	1	0.697714	Mus musculus ubiquitin domain containing 2 (Ubtd2), mRNA,	AI645720; 4930571L24; 9630054F20Rik
ILMN_2744036	2410014A08Rik	47.6076	44.9104	69.0197	50.0227	55.1922	38.5094	0.943346	0.72476	1	0.697733	Mus musculus RIKEN cDNA 2410014A08 gene (2410014A08Rik), mRNA,	mKIAA0152; AI850530; ESTM19; X83352
ILMN_2925558	Zw10	163.917	155.182	235.92	167.693	139.479	97.3302	0.946713	0.710805	1	0.69781	Mus musculus ZW10 homolog (Drosophila), centromere/kinetochore protein (Zw10), mRNA,	6330566F14Rik; MmZw10
ILMN_2646938	Mtx1	428.214	276.524	977.593	897.498	573.133	399.974	0.64576	0.91807	1	0.697873	Mus musculus metaxin 1 (Mtx1), mRNA,	Mtx; Gcap6
ILMN_2660099	Slc25a5	7712.4	5699.94	13897.5	9980.52	5887.24	4108.69	0.739063	0.718152	1	0.697898	Mus musculus solute carrier family 25 (mitochondrial carrier, adenine nucleotide translocator), member 5 (Slc25a5), nuclear gene encoding mitochondrial protein, mRNA,	MGC101927; Ant2
ILMN_2906473	Gbl	276.247	340.371	604.161	577.142	300.522	209.784	1.23213	0.955278	1	0.698066	Mus musculus G protein beta subunit-like (Gbl), mRNA,	AI851821; AA409454; 0610033N12Rik; AI505104
ILMN_2644845	Trmt6	95.013	73.1935	473.365	227.753	143.157	99.9524	0.770353	0.481136	1	0.698201	Mus musculus tRNA methyltransferase 6 homolog (S, cerevisiae) (Trmt6), mRNA,	AU016412; RP23-77H16,2; 3300001M20Rik; CGI-09; mKIAA1153; AW492787
ILMN_2683593	Fubp1	228.167	198.903	526.707	367.151	282.772	197.436	0.871746	0.697069	1	0.698215
ILMN_2683910	Myb	26.0722	25.6427	47.1051	29.0685	30.2903	21.1525	0.983529	0.617097	1	0.698325	Mus musculus myeloblastosis oncogene (Myb), mRNA,	MGC18531; M16449; AI550390; c-myb
ILMN_2745971	Banf1	616.611	411.105	738.356	570.098	695.23	485.503	0.666718	0.772117	1	0.698334	Mus musculus barrier to autointegration factor 1 (Banf1), transcript variant 1, mRNA,	Bcrp1; Baf; L2bp1/Baf; C78287
ILMN_1251771	Cyc1	1193.63	977.839	1378.49	1318.5	751.532	524.866	0.819215	0.956477	1	0.698394	Mus musculus cytochrome c-1 (Cyc1), mRNA,	AA408921; 2610002H19Rik
ILMN_2481389	Zfp326	113.68	63.7061	60.5229	56.3196	66.8906	46.7229	0.560397	0.930551	1	0.698498	Mus musculus zinc finger protein 326 (Zfp326), mRNA,	5730470H14Rik; ZAN75
ILMN_1219169	Gfer	461.359	230.554	831.817	742.77	561.04	391.887	0.499728	0.892949	1	0.6985	Mus musculus growth factor, erv1 (S, cerevisiae)-like (augmenter of liver regeneration) (Gfer), mRNA,	Alr; ERV1
ILMN_2796028	Nsun5	134.985	114.353	177.473	88.931	117.159	81.8601	0.847151	0.501095	1	0.698709	Mus musculus NOL1/NOP2/Sun domain family, member 5 (Nsun5), mRNA,	AI326939; Nol1r; 9830109N13Rik; Wbscr20a; Wbscr20
ILMN_1245795	Ahcyl1	465.473	542.313	922.441	762.015	563.033	393.484	1.16508	0.826085	1	0.698864	Mus musculus S-adenosylhomocysteine hydrolase-like 1 (Ahcyl1), mRNA,	Ahcy-rs3; 1110034F20Rik; AA409031; AA414901; DCAL; Irbit
ILMN_2957161	Smyd2	250.75	237.371	252.957	244.789	244.045	170.613	0.946646	0.96771	1	0.699108	Mus musculus SET and MYND domain containing 2 (Smyd2), mRNA,	1110020E07Rik; Zmynd14; 4930402C15
ILMN_2438303	Ttk	36.6599	33.0804	89.6117	47.7002	41.5417	29.0503	0.902359	0.532299	1	0.699304	Mus musculus Ttk protein kinase (Ttk), mRNA,	esk; AL022661; PYT; Esk1
ILMN_2674575	Mmd	106.791	74.6726	352.821	213.544	158.4	110.796	0.69924	0.605248	1	0.699472	Mus musculus monocyte to macrophage differentiation-associated (Mmd), mRNA,	1200017E07Rik; AA690185; 1810073C06Rik
ILMN_2989535	Casp12	27.5113	29.5132	24.7424	25.2809	28.5148	19.947	1.07277	1.02176	1	0.699533	Mus musculus caspase 12 (Casp12), mRNA,
ILMN_2517170	Tuba4a	41.6244	34.6798	67.9501	37.0696	46.3944	32.4545	0.83316	0.545542	1	0.699535	Mus musculus tubulin, alpha 4A (Tuba4a), mRNA,	Tuba4; M[a]4
ILMN_1233746	Eif3b	37.8876	32.8943	123.461	77.305	52.8846	36.9988	0.868206	0.626147	1	0.699614	Mus musculus eukaryotic translation initiation factor 3, subunit B (Eif3b), mRNA,	EIF3-P116; AL033369; PRT1; D5Wsu45e; AL033334; EIF3-ETA; EIF3-P110; AL033316; AW208965
ILMN_3079823	Rusc2	25.1939	24.4992	27.151	25.9248	27.2549	19.0729	0.972426	0.954839	1	0.699798	Mus musculus RUN and SH3 domain containing 2 (Rusc2), transcript variant 1, mRNA,	AI840675; mKIAA0375
ILMN_2443644	Ube2g1	153.499	121.252	560.82	382.861	236.582	165.566	0.789921	0.682681	1	0.699826	Mus musculus ubiquitin-conjugating enzyme E2G 1 (UBC7 homolog, C, elegans) (Ube2g1), mRNA,	D130023C12Rik; AU014992; AI256795; AW552068; 2700059C12Rik
ILMN_2736723	Pkd1l3	63.6812	29.3885	64.0665	31.1916	53.8899	37.7169	0.461495	0.486863	1	0.699887	Mus musculus polycystic kidney disease 1 like 3 (Pkd1l3), transcript variant 1, mRNA,
ILMN_2627713	C2cd3	149.141	108.703	129.865	90.4814	173.079	121.15	0.728862	0.696735	1	0.699966	Mus musculus C2 calcium-dependent domain containing 3 (C2cd3), mRNA, XM_898162 XM_898171 XM_898180 XM_898190 XM_898198 XM_898211 XM_898219 XM_906365 XM_919792 XM_919798 XM_919811 XM_919824 XM_919836 XM_919846 XM_919852 XM_919861 XM_919867 XM_919873 XM_919879 XM_919890 XM_919906
ILMN_2733193	Cth	43.9535	40.3313	149.608	129.276	91.9979	64.4095	0.91759	0.864098	1	0.70012	Mus musculus cystathionase (cystathionine gamma-lyase) (Cth), mRNA,	0610010I13Rik; AI314617; BC019483; Cys3; MGC28655
ILMN_2960407	Mthfd1	752.398	394.397	820.833	412.298	545.466	381.987	0.524186	0.502292	1	0.700296	Mus musculus methylenetetrahydrofolate dehydrogenase (NADP+ dependent), methenyltetrahydrofolate cyclohydrolase, formyltetrahydrofolate synthase (Mthfd1), mRNA,	E430024A07Rik; DCS; NEUT2; Mthfd
ILMN_1221405	Crk	41.5958	26.6052	50.3785	33.1291	37.1806	26.0429	0.639614	0.657604	1	0.700443	Mus musculus v-crk sarcoma virus CT10 oncogene homolog (avian) (Crk), mRNA,	Crk-II; Crk-III; Crko; Crkol; Crk-I; CrkIII; Crk3
ILMN_2657546	Cops3	1922.6	1894.64	2778.97	3093.04	1735.76	1215.98	0.985461	1.11302	1	0.700547	Mus musculus COP9 (constitutive photomorphogenic) homolog, subunit 3 (Arabidopsis thaliana) (Cops3), mRNA,	Sgn3; Csn3
ILMN_2665545	Rin3	129.95	74.8729	274.081	206.72	155.86	109.209	0.576169	0.754231	1	0.700686	Mus musculus Ras and Rab interactor 3 (Rin3), mRNA,	C86933; 6430500K07
ILMN_2632076	Ctps2	45.1913	45.7669	178.303	352.138	117.433	82.2894	1.01274	1.97494	1	0.700737	Mus musculus cytidine 5'-triphosphate synthase 2 (Ctps2), mRNA,	CTPsH
ILMN_2595842	Def6	209.597	58.297	209.691	99.1644	155.93	109.272	0.278139	0.472907	1	0.700773	Mus musculus differentially expressed in FDCP 6 (Def6), mRNA,	IBP; 2410003F05Rik; 6430538D02Rik; Slat; AV094905; Slat6; SLAT2
ILMN_2445021	Zw10	201.58	193.148	302.47	221.44	195.678	137.13	0.958173	0.732107	1	0.700793	Mus musculus ZW10 homolog (Drosophila), centromere/kinetochore protein (Zw10), mRNA,	6330566F14Rik; MmZw10
ILMN_2867033	Smpd2	161.223	131.143	167.316	170.547	143.669	100.685	0.813429	1.01931	1	0.700811	Mus musculus sphingomyelin phosphodiesterase 2, neutral (Smpd2), mRNA,	nSMase; nSMase1; AW108287
ILMN_3142235	Sfrs1	2046.95	1510.8	4419.94	2867.62	2126.59	1490.36	0.738076	0.648792	1	0.700821	Mus musculus splicing factor, arginine/serine-rich 1 (ASF/SF2) (Sfrs1), transcript variant 1, mRNA,	AI482334; Asf; 5730507C05Rik; Sf2; AW491331; 6330415C05Rik; 1110054N12Rik
ILMN_2637241	Dhps	259.105	255.848	323.18	291.592	224.882	157.623	0.987428	0.902259	1	0.700912	Mus musculus deoxyhypusine synthase (Dhps), mRNA,	MGC74384; Dhs; MGC49129
ILMN_2630593	Emd	122.61	88.1841	361.056	387.707	214.076	150.076	0.719225	1.07381	1	0.701041	Mus musculus emerin (Emd), mRNA,	AW550900
ILMN_1232428	Rpp30	497.788	228.372	900.91	673.042	464.205	325.449	0.458774	0.747069	1	0.701089	Mus musculus ribonuclease P/MRP 30 subunit (human) (Rpp30), mRNA,	TSG15; Rnasep2
ILMN_1253323	D5Wsu178e	179.097	134.679	536.629	335.988	239.771	168.115	0.751988	0.626109	1	0.701151	Mus musculus DNA segment, Chr 5, Wayne State University 178, expressed (D5Wsu178e), mRNA,	AI448296; AI452230; 4933402G07Rik; SELI; mKIAA1724; MGC117838; C79563
ILMN_2655774	Mrps34	1459.96	1310.55	1157.45	1310.91	904.769	634.466	0.89766	1.13258	1	0.701246	Mus musculus mitochondrial ribosomal protein S34 (Mrps34), nuclear gene encoding mitochondrial protein, mRNA,	AV001970; 5330430D13Rik; Tce2; 0610007F04Rik
ILMN_2637886	Mybl2	37.676	30.1458	64.4297	31.7652	30.5797	21.4472	0.80013	0.493021	1	0.701355	Mus musculus myeloblastosis oncogene-like 2 (Mybl2), mRNA,	Bmyb
ILMN_2686898	Aaas	384.341	347.836	460.369	261.37	387.898	272.074	0.90502	0.56774	1	0.701405	Mus musculus achalasia, adrenocortical insufficiency, alacrimia (Aaas), mRNA,	ADRACALA; D030041N15Rik; GL003; AAA
ILMN_2830771	Spag7	336.388	410.188	465.68	739.753	386.288	270.972	1.21939	1.58855	1	0.701476	Mus musculus sperm associated antigen 7 (Spag7), mRNA,	Fsa1l; ACRP; FSA-1; 5730443G10; MGC67704
ILMN_1222872	Wbscr16	126.729	93.7818	276.92	209.829	137.416	96.3964	0.740019	0.757723	1	0.701493	Mus musculus Williams-Beuren syndrome chromosome region 16 homolog (human) (Wbscr16), mRNA,	AU019812; 5730496C04Rik
ILMN_2990872	Pkn1	81.8547	97.8477	111.848	83.1059	57.638	40.4467	1.19538	0.743023	1	0.701736	Mus musculus protein kinase N1 (Pkn1), mRNA,	F730027O18Rik; Prkcl1; Pkn; PAK1; DBK; PRK1; Stk3
ILMN_1227649	Gss	29.955	29.2102	46.0167	79.4181	36.246	25.4503	0.975136	1.72585	1	0.702155	Mus musculus glutathione synthetase (Gss), mRNA,	GS-A/GS-B; AI314904
ILMN_2835012	5730449L18Rik	285.067	298.485	501.366	480.56	329.883	231.667	1.04707	0.958501	1	0.702272	Mus musculus RIKEN cDNA 5730449L18 gene (5730449L18Rik), mRNA,	AL023077
ILMN_2782307	Mettl9	207.43	122.81	783.272	596.144	346.18	243.128	0.592058	0.761095	1	0.702316	Mus musculus methyltransferase like 9 (Mettl9), mRNA,	0610012D09Rik; Drev; AA517660; MNCb-5680
ILMN_2860850	Pcsk4	87.3287	53.3899	73.0982	31.6036	76.7176	53.882	0.611367	0.432344	1	0.702343	Mus musculus proprotein convertase subtilisin/kexin type 4 (Pcsk4), mRNA,	AI647044; SPC5; L21221; 0710008O07; MGC63195; PC4
ILMN_2606873	Th1l	290.528	246.528	338.642	391.571	256.52	180.188	0.848553	1.1563	1	0.702433	Mus musculus TH1-like homolog (Drosophila) (Th1l), mRNA,	C77797; Th1; 2410003I03Rik
ILMN_1253012	Rbm3	34.7144	39.6221	86.797	90.5979	66.852	46.9756	1.14137	1.04379	1	0.70268	Mus musculus RNA binding motif protein 3 (Rbm3), mRNA,	2600016C11Rik; MGC118410
ILMN_2702508	Ebna1bp2	978.663	561.517	1650.86	888.284	797.799	560.658	0.573759	0.538073	1	0.702756	Mus musculus EBNA1 binding protein 2 (Ebna1bp2), mRNA,	Nobp; B830003A16Rik; p40; Ebp2; C81321; AA537058; 1810014B19Rik
ILMN_2620069	Polr1a	452.742	500.836	348.6	216.336	148.587	104.438	1.10623	0.620585	1	0.702873	Mus musculus polymerase (RNA) I polypeptide A (Polr1a), mRNA,	RPA194; 194kDa; 3010014K16Rik; mRPA1
ILMN_2692986	2810410P22Rik	233.385	152.34	405.634	346.016	401.13	281.974	0.652741	0.853026	1	0.70295
ILMN_2735996	P4hb	2147.45	2612.89	3169.15	3506.4	1961.24	1378.71	1.21674	1.10642	1	0.702979	Mus musculus prolyl 4-hydroxylase, beta polypeptide (P4hb), mRNA,	PDI; ERp59; Thbp
ILMN_3085317	Zc3h14	286.136	287.298	703.475	664.194	349.962	246.058	1.00406	0.944161	1	0.703099	Mus musculus zinc finger CCCH type containing 14 (Zc3h14), transcript variant 1, mRNA,	1700016A15Rik; AU014748; 2700069A02Rik; 1010001P15Rik
ILMN_1255927	Ubtf	713.019	567.147	459.441	345.457	545.364	383.457	0.795417	0.751907	1	0.70312	Mus musculus upstream binding transcription factor, RNA polymerase I (Ubtf), transcript variant 2, mRNA,	UBF; A930005G04Rik; UBF1; Tcfubf; NOR-90
ILMN_2730701	Pqlc3	30.3971	29.9298	54.5512	58.5552	35.2525	24.7997	0.984624	1.0734	1	0.703487	Mus musculus PQ loop repeat containing (Pqlc3), mRNA,	C78076; E030024M05Rik
ILMN_2642313	Fiz1	233.265	220.206	373.779	243.437	206.762	145.456	0.944013	0.651285	1	0.703495	Mus musculus Flt3 interacting zinc finger protein 1 (Fiz1), mRNA,	MGC117900; AI790204; FLJ00416; mFLJ00416
ILMN_2660028	Ccdc101	255.007	244.538	309.697	270.957	174.387	122.687	0.958949	0.874909	1	0.703532	Mus musculus coiled-coil domain containing 101 (Ccdc101), mRNA,	9530025I05Rik; 1700023O11Rik
ILMN_1251809	Vps26a	30.392	30.3107	88.6924	105.581	42.5077	29.9163	0.997325	1.19042	1	0.703786	Mus musculus vacuolar protein sorting 26 homolog A (yeast) (Vps26a), mRNA,	AA407240; Vps26; HB58
ILMN_2751055	Atf2	31.9469	30.1753	45.3084	42.2437	31.5073	22.175	0.944547	0.932359	1	0.703805
ILMN_2719888	G3bp1	212.083	167.088	1163.89	834.906	499.781	351.834	0.787844	0.717343	1	0.703977	Mus musculus Ras-GTPase-activating protein SH3-domain binding protein 1 (G3bp1), mRNA,	C87777; mKIAA4115; KIAA4115; RP23-336J1,4; AI849976; G3bp; B430204O07
ILMN_1221657	Brca1	31.6294	28.2003	53.7429	33.1565	30.6994	21.6127	0.891585	0.616946	1	0.704011	Mus musculus breast cancer 1 (Brca1), mRNA,
ILMN_2711401	3200002M19Rik	150.992	65.6236	247.357	82.4683	183.753	129.426	0.434617	0.333398	1	0.70435	Mus musculus RIKEN cDNA 3200002M19 gene (3200002M19Rik), mRNA,	6330414C15Rik
ILMN_2987878	Umps	69.8141	55.6565	262.112	100.214	92.8839	65.4342	0.79721	0.382332	1	0.704473	Mus musculus uridine monophosphate synthetase (Umps), mRNA,	1700095D23Rik; AA408257; BB164745; AL033308
ILMN_3108440	Arl6ip4	2828.54	1974.83	3197.85	2844.93	2334.28	1644.59	0.698178	0.889639	1	0.704535	Mus musculus ADP-ribosylation factor-like 6 interacting protein 4 (Arl6ip4), mRNA,	AA408210; AA408365; Aip-4; Srp25
ILMN_2890399	1700071K01Rik	130.182	109.088	278.06	191.994	150.989	106.393	0.837966	0.690479	1	0.704642	Mus musculus RIKEN cDNA 1700071K01 gene (1700071K01Rik), mRNA,
ILMN_3144458	Fancc	58.5185	60.8022	61.8012	72.3219	52.3249	36.8871	1.03903	1.17023	1	0.704962	Mus musculus Fanconi anemia, complementation group C (Fancc), transcript variant 2, mRNA,	Facc; BB116513
ILMN_2956881	Ppp2r5d	162.593	199.463	121.238	105.218	117.658	82.9466	1.22676	0.867864	1	0.704979	Mus musculus protein phosphatase 2, regulatory subunit B (B56), delta isoform (Ppp2r5d), mRNA,	TEG-271; Tex271
ILMN_2735276	Plekha8	79.0271	88.3969	94.521	143.042	61.2949	43.2132	1.11856	1.51334	1	0.705004	Mus musculus pleckstrin homology domain containing, family A (phosphoinositide binding specific) member 8 (Plekha8), mRNA,	AA517676; BC052360; 6330400G01; FAPP2
ILMN_3145474	2610209A20Rik	37.2088	38.7418	75.9716	60.1814	38.6728	27.2692	1.0412	0.792157	1	0.705126	Mus musculus RIKEN cDNA 2610209A20 gene (2610209A20Rik), mRNA,
ILMN_2634367	Cyp11a1	28.898	28.3221	26.9951	28.5702	27.7037	19.5356	0.980072	1.05835	1	0.705163	Mus musculus cytochrome P450, family 11, subfamily a, polypeptide 1 (Cyp11a1), nuclear gene encoding mitochondrial protein, mRNA,	Cyp11a; cscc; Cypxia1; D9Ertd411e; Scc; P450scc
ILMN_1237206	Raly	74.4771	83.8937	332.186	419.298	180.623	127.382	1.12644	1.26224	1	0.705237	Mus musculus hnRNP-associated with lethal yellow (Raly), mRNA,	AI663842; Merc
ILMN_2656827	LOC100048832	39.8353	30.6959	190.101	62.4955	62.652	44.1874	0.770569	0.32875	1	0.705283	PREDICTED: Mus musculus similar to branched chain aminotransferase 1, cytosolic (LOC100048832), mRNA,
ILMN_2612484	Myo9b	292.89	357.857	244.085	421.516	297.949	210.143	1.22181	1.72692	1	0.7053	Mus musculus myosin IXb (Myo9b), mRNA,
ILMN_2725402	Nsdhl	32.3166	27.9903	167.361	122.317	73.6729	51.966	0.866127	0.730859	1	0.705361	Mus musculus NAD(P) dependent steroid dehydrogenase-like (Nsdhl), mRNA,	H105E3; Str; XAP104; Bpa; AI747449
ILMN_2718843	4632417K18Rik	579.158	408.782	1314.78	664.383	849.955	599.531	0.705822	0.505317	1	0.705368	Mus musculus RIKEN cDNA 4632417K18 gene (4632417K18Rik), mRNA,	AW413625
ILMN_1259631	Ap2b1	59.3505	60.837	60.4282	60.0494	60.3806	42.6041	1.02505	0.993731	1	0.705593	Mus musculus adaptor-related protein complex 2, beta 1 subunit (Ap2b1), transcript variant 1, mRNA,	1300012O03Rik; AI788979
ILMN_1247407	Setd8	43.8446	39.6347	79.3391	59.2854	70.6753	49.8716	0.90398	0.747241	1	0.705645	Mus musculus SET domain containing (lysine methyltransferase) 8 (Setd8), mRNA,	AW536475; 2410195B05Rik; AA617402; MGC117832
ILMN_1213144	Wbp11	758.533	527.754	1752.94	732.396	607.733	428.863	0.695757	0.41781	1	0.705676	Mus musculus WW domain binding protein 11 (Wbp11), mRNA,	D6Wsu113e; 2510026P17Rik; SIPP1; Npwbp
ILMN_2767187	Mrpl53	1088.33	542.002	1095.15	921.528	1326.86	936.466	0.498011	0.841464	1	0.705778	Mus musculus mitochondrial ribosomal protein L53 (Mrpl53), nuclear gene encoding mitochondrial protein, mRNA,	1110007K17Rik
ILMN_1249269	5830457O10Rik	38.5513	37.3008	92.0266	96.5665	79.9049	56.3999	0.967563	1.04933	1	0.705837	Mus musculus RIKEN cDNA 5830457O10 gene (5830457O10Rik), mRNA,
ILMN_1253844	Orc5l	407.701	384.712	792.974	511.233	511.474	361.02	0.943613	0.644704	1	0.705842	Mus musculus origin recognition complex, subunit 5-like (S, cerevisiae) (Orc5l), mRNA,	Orc5; MmORC5; AL033327
ILMN_2682887	Trmt2a	39.6785	35.8821	78.9914	79.1282	43.3004	30.5642	0.904321	1.00173	1	0.705864	Mus musculus TRM2 tRNA methyltransferase 2 homolog A (S, cerevisiae) (Trmt2a), transcript variant 2, mRNA,
ILMN_1221469	Paqr6	25.4666	25.748	24.1842	27.4288	29.2954	20.6914	1.01105	1.13416	1	0.706301	Mus musculus progestin and adipoQ receptor family member VI (Paqr6), mRNA,	1500001B10Rik
ILMN_1256682	Rprd1b	99.5777	75.2724	285.663	185.113	140.813	99.4621	0.755916	0.648011	1	0.70634	Mus musculus regulation of nuclear pre-mRNA domain containing 1B (Rprd1b), mRNA,	Crept; RP23-396G1,1; 2810446G03Rik
ILMN_2983669	Setd6	358.594	360.511	539.341	312.351	301.591	213.027	1.00534	0.579135	1	0.706344	Mus musculus SET domain containing 6 (Setd6), mRNA,	3110004G14Rik; C76402; 0610039J04Rik; AI413388
ILMN_2675800	Svil	24.3989	24.0771	32.1448	25.8104	29.7443	21.0119	0.98681	0.802943	1	0.706417	Mus musculus supervillin (Svil), transcript variant 1, mRNA,	B430302E16Rik; AU024053
ILMN_2755981	Fam178a	362.213	426.224	592.8	612.236	405.866	286.712	1.17672	1.03279	1	0.706419	Mus musculus family with sequence similarity 178, member A (Fam178a), mRNA,	AU014917; 3632432H19
ILMN_1212759	Sdccag3	83.4087	82.3596	121.396	105.66	75.8466	53.6096	0.987422	0.870373	1	0.706817	Mus musculus serologically defined colon cancer antigen 3 (Sdccag3), transcript variant 4, mRNA,	C330016H24Rik; C630038K21Rik; RP23-306D20,6
ILMN_1234589	Ppa2	191.132	94.2483	490.908	363.708	346.799	245.16	0.493105	0.740888	1	0.706923	Mus musculus pyrophosphatase (inorganic) 2 (Ppa2), nuclear gene encoding mitochondrial protein, mRNA,	MGC6539; Sid6306; 1110013G13Rik
ILMN_3122437	Rps27a	37.7437	23.1681	45.4154	24.8902	30.8625	21.8267	0.613826	0.548055	1	0.707224	Mus musculus ribosomal protein S27a (Rps27a), transcript variant 2, mRNA,	0610006J14Rik
ILMN_2766580	Cox4nb	287.427	213.621	299.626	206.927	185.067	130.896	0.743219	0.690618	1	0.707291	Mus musculus COX4 neighbor (Cox4nb), mRNA,	Noc4
ILMN_2635968	Mfsd8	59.8307	57.3774	78.7069	74.4489	57.8601	40.9269	0.958996	0.9459	1	0.707342	Mus musculus major facilitator superfamily domain containing 8 (Mfsd8), mRNA,	MGC132950; MGC132949; AI836898; 2810423E13Rik
ILMN_2960214	Nucks1	204.13	156.023	397.606	299.266	305.178	215.885	0.764332	0.75267	1	0.707409	Mus musculus nuclear casein kinase and cyclin-dependent kinase substrate 1 (Nucks1), mRNA,	C78391; 8430423A01Rik; 2700010L10Rik; Nucks; AI647518
ILMN_2633942	Paox	113.189	80.0069	112.703	74.2356	114.845	81.2467	0.706846	0.658686	1	0.707446	Mus musculus polyamine oxidase (exo-N4-amino) (Paox), mRNA,	AI118225; 2410012F02Rik; Pao
ILMN_1220022	Paox	37.3855	30.8854	55.7858	43.4617	46.1188	32.6278	0.826133	0.779082	1	0.707473	Mus musculus polyamine oxidase (exo-N4-amino) (Paox), mRNA,	AI118225; 2410012F02Rik; Pao
ILMN_2648200	Itpkc	64.9624	70.5016	119.669	98.4364	73.3613	51.9034	1.08527	0.822574	1	0.707504	Mus musculus inositol 1,4,5-trisphosphate 3-kinase C (Itpkc), mRNA,	9130023N17Rik
ILMN_2976441	Blk	25.2306	19.9697	41.4225	24.1477	31.8648	22.5469	0.791486	0.58296	1	0.70758	Mus musculus B lymphoid kinase (Blk), mRNA,
ILMN_1242419	Exosc10	314.572	258.156	339.663	279.349	289.797	205.064	0.820656	0.822431	1	0.707613	Mus musculus exosome component 10 (Exosc10), mRNA,	PM-Scl; Pmscl2; PM/Scl-100; RRP6; p4; p2; p3
ILMN_2696360	2310010B21Rik	162.575	121.257	444.679	218.904	156.69	110.888	0.745851	0.492275	1	0.707692
ILMN_2872599	Ankrd54	158.305	202.153	196.583	189.426	175.807	124.419	1.27699	0.963594	1	0.707701	Mus musculus ankyrin repeat domain 54 (Ankrd54), mRNA,	C730048E16Rik; EST475269; MGC25673; EST1068184
ILMN_1251572	Xpo7	71.0417	55.882	190.904	106.245	74.5685	52.7733	0.786609	0.556534	1	0.707715	Mus musculus exportin 7 (Xpo7), mRNA,	mKIAA0745; BB164534; Ranbp16; 4930506C02Rik
ILMN_2827311	Gtf3a	1658.73	1127.82	1918.44	1129.57	1453	1028.61	0.679932	0.588792	1	0.707922	Mus musculus general transcription factor III A (Gtf3a), mRNA,	5330403M05Rik; 2610111I01Rik; 2010015D03Rik
ILMN_2670662	Csde1	58.4404	56.7373	238.151	254.874	129.743	91.8559	0.970858	1.07022	1	0.707983	Mus musculus cold shock domain containing E1, RNA binding (Csde1), mRNA,	MGC19174; BC016898; AA960392; mKIAA0885; D3Jfr1; unr
ILMN_1246508	Pars2	63.3856	66.0621	87.2336	70.2926	74.3124	52.6141	1.04222	0.805797	1	0.708013	Mus musculus prolyl-tRNA synthetase (mitochondrial)(putative) (Pars2), nuclear gene encoding mitochondrial protein, transcript variant 1, mRNA,	BC027073; RP23-97O7,3; MGC47008
ILMN_2704119	Cul4a	29.5629	32.6399	39.796	59.3845	41.4834	29.3727	1.10408	1.49222	1	0.708061	Mus musculus cullin 4A (Cul4a), mRNA,	2810470J21Rik; MGC36573; AW495282
ILMN_2492161	Tssc1	67.3793	44.2884	270.922	239.301	127.622	90.3653	0.6573	0.883281	1	0.708071	Mus musculus tumor suppressing subtransferable candidate 1 (Tssc1), mRNA,	D12Ertd604e
ILMN_2718974	Rpusd4	402.809	247.955	1017.06	558.261	460.329	325.961	0.615564	0.548897	1	0.708104	Mus musculus RNA pseudouridylate synthase domain containing 4 (Rpusd4), mRNA,	2410001E19Rik
ILMN_1220294	Eif6	1473.06	862.707	1531.24	814.1	1178.13	834.26	0.585656	0.531662	1	0.708124	Mus musculus eukaryotic translation initiation factor 6 (Eif6), mRNA,	AA408895; Itgb4bp; imc-415; 1110004P11; p27BBP
ILMN_2767918	Ifi30	150.83	140.348	197.588	147.221	166.828	118.136	0.930508	0.74509	1	0.708129	Mus musculus interferon gamma inducible protein 30 (Ifi30), mRNA,	IP30; GILT
ILMN_1218934	Rdm1	251.112	222.08	291.808	304.903	379.061	268.431	0.884388	1.04488	1	0.708146	Mus musculus RAD52 motif 1 (Rdm1), mRNA,	2410008M22Rik; Rad52b; AW212028
ILMN_2427063	Uxt	852.304	511.285	457.05	354.161	652.897	462.356	0.599886	0.774885	1	0.70816	Mus musculus ubiquitously expressed transcript (Uxt), mRNA,	0910002B17Rik
ILMN_2868997	Rangap1	2983.01	2174.05	6049.46	3343.94	2814.36	1993.03	0.728812	0.552767	1	0.708166	Mus musculus RAN GTPase activating protein 1 (Rangap1), mRNA,	mKIAA1835; Fug1; C79654
ILMN_2959976	Tom1	43.1839	46.7828	112.868	117.616	62.0412	43.9445	1.08334	1.04206	1	0.708313	Mus musculus target of myb1 homolog (chicken) (Tom1), mRNA,
ILMN_2591440	Ccrn4l	103	114.471	553.179	356.582	154.353	109.354	1.11137	0.644605	1	0.708469	Mus musculus CCR4 carbon catabolite repression 4-like (S, cerevisiae) (Ccrn4l), mRNA,	Ccr4; nocturnin; AU043840
ILMN_2860725	2310061F22Rik	240.718	176.505	272.792	147.42	152.803	108.273	0.733242	0.54041	1	0.708578	Mus musculus RIKEN cDNA 2310061F22 gene (2310061F22Rik), mRNA,
ILMN_2792485	Ube2e2	23.1434	25.0814	25.3632	27.0648	26.86	19.0395	1.08374	1.06709	1	0.708843	Mus musculus ubiquitin-conjugating enzyme E2E 2 (UBC4/5 homolog, yeast) (Ube2e2), mRNA,	BC016265; MGC28917
ILMN_2624135	Polr2d	232.47	147.026	428.162	318.632	323.667	229.445	0.632451	0.744185	1	0.708891	Mus musculus polymerase (RNA) II (DNA directed) polypeptide D (Polr2d), transcript variant 1, mRNA,	2310002G05Rik; RBP4; HSRBP4; 2610028L19Rik
ILMN_1229175	Hus1	174.102	97.7677	463.137	270.294	210.943	149.541	0.561553	0.583616	1	0.708919	Mus musculus Hus1 homolog (S, pombe) (Hus1), mRNA,	mHus1
ILMN_2724919	Mtx1	1481.61	1198.65	1863.12	1725.02	1247.14	884.252	0.809022	0.925876	1	0.709026	Mus musculus metaxin 1 (Mtx1), mRNA,	Mtx; Gcap6
ILMN_2925570	Nubp2	83.0717	50.1258	111.29	57.0234	85.646	60.7261	0.603404	0.512387	1	0.709036	Mus musculus nucleotide binding protein 2 (Nubp2), mRNA,	D17Wsu11e
ILMN_1229687	Rnf141	41.4657	35.9966	86.5348	71.0741	55.6477	39.469	0.868105	0.821336	1	0.709266	Mus musculus ring finger protein 141 (Rnf141), mRNA,	AU022812; ZNF230; 2610110L04Rik; AA792898; ZFP36
ILMN_1250438	Marcksl1	108.239	169.457	141.69	207.56	164.11	116.406	1.56558	1.46489	1	0.709315	Mus musculus MARCKS-like 1 (Marcksl1), mRNA,	Macs3; F52; AL022768; D4Bc1; Macs-2; AW215397; MacMARCKS; Macs-3; Mrp; Macs2; AW536807; Mlp
ILMN_1213872	Supt3h	442.063	433.143	576.026	652.171	532.649	377.884	0.979822	1.13219	1	0.709443	Mus musculus suppressor of Ty 3 homolog (S, cerevisiae) (Supt3h), mRNA,	AI315192; 2310066G22Rik; SPT3L; SPT3
ILMN_2650683	Tdrd3	176.789	196.082	299.21	241.196	157.602	111.825	1.10913	0.80611	1	0.709542	Mus musculus tudor domain containing 3 (Tdrd3), mRNA,	6720468N18; 4732418C03Rik
ILMN_3128784	Sap30l	680.304	784.539	819.47	1300.83	705.387	500.535	1.15322	1.5874	1	0.709589	Mus musculus SAP30-like (Sap30l), mRNA,	MGC151406; RP23-268K22,3; AF006998; MGC151408; L55; 2310079P12Rik
ILMN_2588398	Impdh2	3971.06	4086.02	6909.98	5469.64	4291.6	3045.46	1.02895	0.791556	1	0.709632
ILMN_2618549	Rab7	52.862	50.8589	160.69	176.142	105.47	74.8616	0.962108	1.09616	1	0.709793	Mus musculus RAB7, member RAS oncogene family (Rab7), mRNA,	MGC102153
ILMN_2717011	Bik	41.89	39.9105	47.0519	44.2406	30.3727	21.5596	0.952746	0.94025	1	0.709835	Mus musculus BCL2-interacting killer (Bik), mRNA,	Nbk; Blk; Biklk
ILMN_2919263	Slc25a1	239.009	213.667	313.248	233.434	205.374	145.789	0.89397	0.745206	1	0.709869	Mus musculus solute carrier family 25 (mitochondrial carrier, citrate transporter), member 1 (Slc25a1), nuclear gene encoding mitochondrial protein, mRNA,	MGC47055; Dgsj; 1300019P08Rik; AI194714; Slc20a3; Ctp; 2610100G11Rik
ILMN_2773540	Thap4	329.432	161.164	820.5	438.61	355.724	252.523	0.489218	0.534565	1	0.709884	Mus musculus THAP domain containing 4 (Thap4), mRNA,	2010320B01Rik
ILMN_2449335	Sf1	196.018	226.851	156.145	127.558	189.947	134.86	1.15729	0.81692	1	0.709986	Mus musculus splicing factor 1 (Sf1), mRNA, XM_979946 XM_979979	CW17R; MZFM; Zfp162; WBP4; BB094781
ILMN_1239027	Epn2	32.7617	32.1968	42.5864	42.4231	36.8492	26.1641	0.982755	0.996166	1	0.710031	Mus musculus epsin 2 (Epn2), mRNA,	AA536924; 9530051D10Rik; Ibp2
ILMN_1236610	Socs6	49.3745	48.2813	160.223	122.744	73.0699	51.8906	0.97786	0.766083	1	0.71015	Mus musculus suppressor of cytokine signaling 6 (Socs6), mRNA,	STATI4; Cish4; SSI4; 1500012M23Rik; HSPC060; STAI4; SOCS-4; Cis4; Socs4; 5830401B18Rik; MGC102463; SOCS-6; AI447482
ILMN_2744280	Ard1	980.042	540.852	1163.83	814.041	1065.89	757.137	0.551866	0.699452	1	0.710335
ILMN_2987564	Tmem65	122.792	145.827	301.639	313.265	158.62	112.674	1.18759	1.03854	1	0.710341	Mus musculus transmembrane protein 65 (Tmem65), mRNA,	2610029O13Rik; 4930438D12Rik
ILMN_1226280	Nola1	4257.53	2356.66	5284.38	3597.93	4119.55	2927.32	0.553529	0.680861	1	0.710594	Mus musculus nucleolar protein family A, member 1 (H/ACA small nucleolar RNPs) (Nola1), mRNA,	AA409823; GAR1; AI326794; C430047J18Rik
ILMN_2921095	Hnrpm	2188.93	2114.04	3339.11	3304.49	2441.9	1735.34	0.965791	0.989632	1	0.710651	Mus musculus heterogeneous nuclear ribonucleoprotein M (Hnrpm), mRNA,	mKIAA4193; 2610023M21Rik; KIAA4193; AA409009
ILMN_2497581	Uhrf1	25.6558	25.1457	43.5929	27.0465	28.2022	20.0456	0.980119	0.620434	1	0.710779	Mus musculus ubiquitin-like, containing PHD and RING finger domains, 1 (Uhrf1), mRNA,	AL022808; ICBP90; Np95; RNF106
ILMN_3162133	1190002N15Rik	33.3095	34.6446	79.6895	67.9609	55.2495	39.2736	1.04008	0.852821	1	0.71084	Mus musculus RIKEN cDNA 1190002N15 gene (1190002N15Rik), mRNA,
ILMN_2780316	Rnpep	319.115	275.879	457.438	305.06	265.938	189.066	0.864511	0.666888	1	0.71094	Mus musculus arginyl aminopeptidase (aminopeptidase B) (Rnpep), mRNA,	MGC29229
ILMN_3143557	Adi1	300.367	190.644	1036.42	618.657	629.332	447.423	0.634703	0.596917	1	0.710949	Mus musculus acireductone dioxygenase 1 (Adi1), mRNA,	AL024210
ILMN_2920541	Tbc1d9	30.7526	36.6844	27.7771	31.6036	30.3993	21.6129	1.19289	1.13776	1	0.710965	Mus musculus TBC1 domain family, member 9 (Tbc1d9), mRNA,	AI847101; AW490653; 4933431N12Rik; C76116
ILMN_2608602	Grsf1	1047.66	864.6	2711.13	2252.1	1096.67	779.703	0.825266	0.830688	1	0.710973	Mus musculus G-rich RNA sequence binding factor 1 (Grsf1), transcript variant 1, mRNA,	BB232551; D5Wsu31e; B130010H02; C80280
ILMN_2845272	Klhdc2	1676.5	1391.03	3342.21	3819.57	1924.61	1368.99	0.829718	1.14283	1	0.71131	Mus musculus kelch domain containing 2 (Klhdc2), mRNA,	D12Ertd522e; LCP; HCLP-1; 2310022K15Rik
ILMN_2994108	Spsb3	319.007	319.721	501.078	535.075	298.804	212.58	1.00224	1.06785	1	0.711437	Mus musculus splA/ryanodine receptor domain and SOCS box containing 3 (Spsb3), mRNA,	SSB3; mKIAA4204; Tce1; 3300001M01Rik; KIAA4204; 2310012N15Rik
ILMN_2734969	Eral1	178.085	165.298	283.033	228.195	204.451	145.469	0.928195	0.80625	1	0.711509	Mus musculus Era (G-protein)-like 1 (E, coli) (Eral1), mRNA,	Era; 9130407C09Rik; MERA-W; MERA-S; 2610524P08Rik; AU019798
ILMN_1232962	Stag2	47.5147	49.6237	190.17	193.129	75.7071	53.8727	1.04439	1.01556	1	0.711594	Mus musculus stromal antigen 2 (Stag2), transcript variant 2, mRNA,	SAP2; SA-2; B230112I07Rik; 9230105L23Rik
ILMN_2897858	Hus1	105.352	66.0158	264.581	118.045	116.12	82.6309	0.626622	0.446157	1	0.7116	Mus musculus Hus1 homolog (S, pombe) (Hus1), mRNA,	mHus1
ILMN_2700400	Galnt11	330.111	538.953	553.551	797.521	569.884	405.603	1.63264	1.44074	1	0.711729	Mus musculus UDP-N-acetyl-alpha-D-galactosamine:polypeptide N-acetylgalactosaminyltransferase 11 (Galnt11), mRNA,	A430075I06Rik; AI648252; E430002F06Rik
ILMN_2620435	Ctps	1729.92	1328.19	4039.14	2271.49	1640.54	1167.71	0.767776	0.562369	1	0.711781	Mus musculus cytidine 5'-triphosphate synthase (Ctps), mRNA,
ILMN_2652719	Ptprcap	441.014	175.527	332.948	171.704	460.038	327.459	0.398007	0.515709	1	0.711807	Mus musculus protein tyrosine phosphatase, receptor type, C polypeptide-associated protein (Ptprcap), mRNA,	LSM-1; AI605264; CD-45-AP; LPAP
ILMN_2722389	Scrib	47.6022	50.0194	37.8023	28.8737	38.1628	27.1718	1.05078	0.763808	1	0.711998	Mus musculus scribbled homolog (Drosophila) (Scrib), mRNA,	Scrb1; CRIB; mKIAA0147; vartul; Crc; SCRIB1; AI118201; KIAA0147
ILMN_2475271	Trappc5	45.182	47.0947	67.0811	52.4196	57.0126	40.6106	1.04233	0.781437	1	0.71231	Mus musculus trafficking protein particle complex 5 (Trappc5), mRNA,	4021401A16Rik; TRS31
ILMN_3074516	Psmg2	736.776	486.314	797.703	629.523	751.867	535.586	0.660056	0.789169	1	0.712342	Mus musculus proteasome (prosome, macropain) assembly chaperone 2 (Psmg2), mRNA,	1700017I17Rik; Clast3; AW545363
ILMN_1223960	Scand1	290.672	463.566	182.834	499.102	313.55	223.404	1.59481	2.72981	1	0.7125	Mus musculus SCAN domain-containing 1 (Scand1), mRNA,	2310003H23Rik; Ppargc2; PGC-2; Leap1
ILMN_1213426	Fam134a	158.726	193.578	468.39	729.021	210.339	149.874	1.21958	1.55644	1	0.712533	Mus musculus family with sequence similarity 134, member A (Fam134a), mRNA,	MGC47289
ILMN_2617087	Egln1	39.6505	30.6657	53.4203	41.2732	60.6585	43.224	0.7734	0.772613	1	0.712578	Mus musculus EGL nine homolog 1 (C, elegans) (Egln1), mRNA,	Phd2; ORF13; SM-20; AI503754; C1orf12
ILMN_2841334	Suhw4	145.809	220.101	264.76	270.128	175.323	124.964	1.50951	1.02027	1	0.712766	Mus musculus suppressor of hairy wing homolog 4 (Drosophila) (Suhw4), mRNA,	MGC36902; ZNF634; A930005F02Rik; BC027163
ILMN_1220632	Psmc5	858.995	483.666	1774.52	1371.58	843.454	601.249	0.56306	0.772931	1	0.712842	Mus musculus protease (prosome, macropain) 26S subunit, ATPase 5 (Psmc5), mRNA,	mSUG1
ILMN_2958159	Eno1	4919.22	3519.24	11445.2	5043.18	7366.03	5251	0.715406	0.440638	1	0.712868	Mus musculus enolase 1, alpha non-neuron (Eno1), mRNA,	Eno-1; MGC107267; MGC103111; 0610008I15; MBP-1; AL022784
ILMN_2670247	Fxn	55.1745	63.2032	72.5041	50.018	58.1995	41.4914	1.14552	0.689865	1	0.712918	Mus musculus frataxin (Fxn), nuclear gene encoding mitochondrial protein, mRNA,	FA; X25; FARR; Frda
ILMN_1215901	Agpat2	39.0742	35.1329	64.9521	62.8826	54.551	38.8916	0.899134	0.968138	1	0.71294	Mus musculus 1-acylglycerol-3-phosphate O-acyltransferase 2 (lysophosphatidic acid acyltransferase, beta) (Agpat2), mRNA,	LPAAB; BSCL1; AV000834; 2510002J07Rik; LPAAT-beta; BSCL
ILMN_2740922	Mrpl46	1055.14	669.829	1118.86	821.999	751.69	536.038	0.634827	0.734673	1	0.71311	Mus musculus mitochondrial ribosomal protein L46 (Mrpl46), nuclear gene encoding mitochondrial protein, mRNA,	LIECG2; C15orf4; C80107; 3110052F15Rik; P2ECSL
ILMN_2657734	Ddx46	398.448	369.444	641.417	460.952	277.08	197.617	0.927206	0.718647	1	0.713213
ILMN_1246841	Relb	31.2069	31.4662	29.6537	26.3355	29.6327	21.1348	1.00831	0.888102	1	0.713225	Mus musculus avian reticuloendotheliosis viral (v-rel) oncogene related B (Relb), mRNA,	MGC143683; MGC143684
ILMN_2767227	Nudt16l1	384.972	358.088	783.203	911.767	346.618	247.252	0.930164	1.16415	1	0.713326	Mus musculus nudix (nucleoside diphosphate linked moiety X)-type motif 16-like 1 (Nudt16l1), mRNA,	5330437I08Rik; 1110001K21Rik; Sdos
ILMN_2771396	Prkag1	255.212	274.779	193.855	389.157	198.542	141.63	1.07667	2.00747	1	0.713349	Mus musculus protein kinase, AMP-activated, gamma 1 non-catalytic subunit (Prkag1), mRNA,	Prkaac; BB036179; AA571379
ILMN_2678547	Lypla1	71.0291	81.6356	391.966	450.582	149.56	106.69	1.14933	1.14955	1	0.713357	Mus musculus lysophospholipase 1 (Lypla1), mRNA,	Pla1a
ILMN_1219703	Myg1	310.271	241.405	426.249	346.43	339.741	242.37	0.778047	0.812739	1	0.713398	Mus musculus melanocyte proliferating gene 1 (Myg1), mRNA,	5830429P19Rik; AI325965; Gamm1; 0610023A07Rik; 2810433J21Rik
ILMN_3162347	Mlph	28.7017	29.7343	26.3251	26.3141	29.5957	21.1142	1.03598	0.999581	1	0.71342	Mus musculus melanophilin (Mlph), mRNA,	5031433I09Rik; Slac-2a; l(1)-3Rk; 2210418F23Rik; ln; D1Wsu84e; l1Rk3; AW228792
ILMN_2764607	1810009N02Rik	74.7384	48.1625	92.1042	107.686	58.8509	41.9857	0.644414	1.16918	1	0.713425	Mus musculus RIKEN cDNA 1810009N02 gene (1810009N02Rik), mRNA,
ILMN_1254047	Slc26a9	25.6357	24.6725	25.7344	26.6151	26.2764	18.7465	0.962426	1.03422	1	0.713434	Mus musculus solute carrier family 26, member 9 (Slc26a9), mRNA,	E030002L01Rik
ILMN_2850527	Thoc1	253.893	206.527	721.4	364.874	292.865	208.974	0.813439	0.505786	1	0.713551	Mus musculus THO complex 1 (Thoc1), mRNA,	MGC28284; 3110002N20Rik; AW107452; NMP-84
ILMN_3043485	4933407P14Rik	26.0249	32.5426	24.4406	23.6296	27.458	19.5952	1.25044	0.966816	1	0.713645	Mus musculus RIKEN cDNA 4933407P14 gene (4933407P14Rik), transcript variant 2, mRNA,	IMP5; RP23-344E9,2
ILMN_3096250	Coil	79.239	70.0411	153.829	105.749	89.5754	63.929	0.883922	0.687444	1	0.713689	Mus musculus coilin (Coil), mRNA,	p80-coilin; C79982; Cln80; MGC37472
ILMN_2750314	D630048P19Rik	166.693	145.033	118.263	99.8648	106.854	76.2623	0.870058	0.844428	1	0.713703
ILMN_2738475	Rbm6	51.9084	56.1035	94.6844	68.7408	53.9022	38.476	1.08082	0.726	1	0.713812	Mus musculus RNA binding motif protein 6 (Rbm6), transcript variant 1, mRNA,	mKIAA4015; g16; KIAA4015; NY-LU-12; 4930506F14Rik; Def-3
ILMN_2461696	Arfgap2	60.2338	51.4131	92.3603	92.4366	60.7552	43.3714	0.85356	1.00083	1	0.713871	Mus musculus ADP-ribosylation factor GTPase activating protein 2 (Arfgap2), mRNA,	2310032E02Rik
ILMN_1252310	Dnmt3b	265.191	183.761	606.5	346.855	296.23	211.524	0.692936	0.571896	1	0.714053	Mus musculus DNA methyltransferase 3B (Dnmt3b), transcript variant 4, mRNA,	MGC124407
ILMN_2613182	Ino80c	241.245	154.518	762.456	841.233	282.823	201.969	0.6405	1.10332	1	0.714117	Mus musculus INO80 complex subunit C (Ino80c), mRNA,
ILMN_2598451	Rabif	79.6939	97.656	245.88	214.16	125.259	89.4758	1.22539	0.87099	1	0.714328	Mus musculus RAB interacting factor (Rabif), mRNA,	AI842864; RASGFR3; E130318E12Rik; MSS4; AW549708
ILMN_2964344	Dpp9	79.3574	95.2443	75.7647	53.4009	62.1353	44.3934	1.2002	0.704826	1	0.714464	Mus musculus dipeptidylpeptidase 9 (Dpp9), mRNA,	A330078I11; 6430584G11Rik; DPRP2
ILMN_2946873	D030070L09Rik	103.55	77.2511	236.02	238.823	124.777	89.1711	0.746028	1.01188	1	0.714642	Mus musculus RIKEN cDNA D030070L09 gene (D030070L09Rik), mRNA,
ILMN_3066172	Traf3	27.9442	23.9416	36.9569	27.1658	29.0014	20.7288	0.856767	0.735066	1	0.714751	Mus musculus Tnf receptor-associated factor 3 (Traf3), transcript variant 1, mRNA,	CD40bp; CAP-1; AI528849; amn; LAP1; CRAF1; T-BAM
ILMN_1219440	Rdh16	31.4527	31.437	29.4216	31.4518	29.5535	21.1264	0.999503	1.069	1	0.714853	Mus musculus retinol dehydrogenase 16 (Rdh16), mRNA,	CRAD1; MGC107668; Rdh6; CRAD
ILMN_2742498	Nup88	43.8959	40.1545	187.671	123.18	70.5331	50.421	0.914767	0.656361	1	0.714856	Mus musculus nucleoporin 88 (Nup88), transcript variant 1, mRNA,	88kDa; Nup84; Prei2
ILMN_1237627	Rad9	35.2087	41.2744	42.0518	47.9758	36.497	26.092	1.17228	1.14088	1	0.714909	Mus musculus RAD9 homolog (S, pombe) (Rad9), mRNA,
ILMN_2711570	Ints3	496.661	312.83	613.88	479.32	475.651	340.148	0.629866	0.780805	1	0.71512	Mus musculus integrator complex subunit 3 (Ints3), transcript variant 1, mRNA,	C77668
ILMN_2627566	Capn5	433.756	115.014	753.923	256.797	449.201	321.239	0.265158	0.340614	1	0.715135	Mus musculus calpain 5 (Capn5), mRNA,
ILMN_2718350	9030221M09Rik	40.831	43.4894	97.2155	84.3803	51.6614	36.9459	1.06511	0.867972	1	0.715156
ILMN_1220276	Akap10	63.5666	88.752	106.439	130.429	98.4348	70.3997	1.39621	1.22538	1	0.715191	Mus musculus A kinase (PRKA) anchor protein 10 (Akap10), nuclear gene encoding mitochondrial protein, mRNA,	D-AKAP2; B130049N18Rik; 1500031L16Rik
ILMN_2750578	Mtmr9	97.5805	120.126	111.978	99.3394	80.7102	57.7307	1.23105	0.887134	1	0.715284	Mus musculus myotubularin related protein 9 (Mtmr9), mRNA,	LIP-STYX; MGC54783; MTMR8; AF073881; mMTMH3; 9430075G12Rik; AA516943
ILMN_2593532	Bud13	202.192	176.906	544.035	495.354	237.447	169.85	0.874938	0.910519	1	0.715318	Mus musculus BUD13 homolog (yeast) (Bud13), mRNA,	MGC38070; D030060M11Rik; AV305342
ILMN_1240566	Cep170	34.3417	42.4703	58.412	49.7644	33.5052	23.9694	1.2367	0.851956	1	0.715394	Mus musculus centrosomal protein 170 (Cep170), mRNA,	AI195353; 4933426L22Rik; A330004A13Rik
ILMN_2499400	Vamp8	226.805	91.1551	156.532	185.497	189.93	135.875	0.401909	1.18504	1	0.715396	Mus musculus vesicle-associated membrane protein 8 (Vamp8), mRNA,	endobrevin; Edb; AU041171
ILMN_1229435	Ints3	54.7879	39.1765	51.6795	40.0006	65.5061	46.8662	0.715059	0.774013	1	0.715447	Mus musculus integrator complex subunit 3 (Ints3), transcript variant 1, mRNA,	C77668
ILMN_2987107	Fam162a	1267.61	1104.26	1603.44	1337.64	2284.2	1634.5	0.871141	0.834227	1	0.715568	Mus musculus family with sequence similarity 162, member A (Fam162a), mRNA,
ILMN_1235035	Nup155	66.8118	87.7734	58.6632	43.6575	45.1812	32.3315	1.31374	0.744207	1	0.715597	Mus musculus nucleoporin 155 (Nup155), mRNA,	D930027M19Rik; mKIAA0791
ILMN_2991339	Zfp646	41.0167	50.5257	33.7689	27.7615	37.9322	27.1452	1.23183	0.822103	1	0.715622	Mus musculus zinc finger protein 646 (Zfp646), mRNA,	6820429M01
ILMN_2764250	Ccdc116	47.3051	37.7138	89.2365	50.1431	39.2512	28.0923	0.797246	0.561912	1	0.715706	Mus musculus coiled-coil domain containing 116 (Ccdc116), mRNA,	4930432J16Rik
ILMN_1225406	Ccl24	24.9653	24.6402	28.1293	25.2393	28.0506	20.0771	0.986981	0.89726	1	0.715746	Mus musculus chemokine (C-C motif) ligand 24 (Ccl24), mRNA,	Scya24; CKb-6; MPIF-2
ILMN_1232095	LOC100047911	202.002	268.372	455.918	530.598	224.119	160.458	1.32856	1.1638	1	0.715948	PREDICTED: Mus musculus hypothetical protein LOC100047911 (LOC100047911), mRNA,
ILMN_2612090	2610034E13Rik	41.002	42.2525	42.433	33.0296	37.9319	27.1575	1.0305	0.778394	1	0.715954
ILMN_2772380	Mrto4	953.174	412.014	995.758	433.26	700.994	501.961	0.432254	0.435105	1	0.71607	Mus musculus MRT4, mRNA turnover 4, homolog (S, cerevisiae) (Mrto4), mRNA,	Mrt4; Mg684; 2610012O22Rik
ILMN_3109564	Brca2	67.7315	80.869	51.0198	40.1003	51.5958	36.9547	1.19396	0.785975	1	0.716234	Mus musculus breast cancer 2 (Brca2), transcript variant 1, mRNA,	Fancd1; RAB163; AW045498; AI256696
ILMN_2789562	P4ha2	28.2635	29.2094	27.967	28.2753	33.6891	24.1316	1.03347	1.01102	1	0.716302	Mus musculus procollagen-proline, 2-oxoglutarate 4-dioxygenase (proline 4-hydroxylase), alpha II polypeptide (P4ha2), transcript variant 2, mRNA,	C76437; AA407196; P4hl
ILMN_2887208	Rab1b	44.2689	37.0531	45.7605	46.2032	40.6241	29.103	0.837	1.00967	1	0.716397	Mus musculus RAB1B, member RAS oncogene family (Rab1b), mRNA,	1110011F09Rik
ILMN_1225300	Slc25a29	31.982	37.7423	32.6268	30.9218	30.6768	21.9847	1.18011	0.947744	1	0.716655	Mus musculus solute carrier family 25 (mitochondrial carrier, palmitoylcarnitine transporter), member 29 (Slc25a29), mRNA,	C030003J19Rik; CACL; mCACL
ILMN_1235139	Sfpi1	63.8392	35.766	60.7401	42.6063	50.0535	35.8763	0.560251	0.701452	1	0.71676	Mus musculus SFFV proviral integration 1 (Sfpi1), mRNA,	PU,1; Spi-1; Tfpu,1; Dis-1; Dis1; Sfpi-1; Tcfpu1
ILMN_2885206	Bnc2	27.1585	26.3899	29.4978	31.6773	26.9747	19.3404	0.971697	1.07389	1	0.716982	Mus musculus basonuclin 2 (Bnc2), mRNA,	MGC124423; MGC124424; 5031434M05Rik
ILMN_3115677	Ilf3	52.8464	48.201	84.2368	78.2165	71.7802	51.4885	0.912095	0.928532	1	0.717308	Mus musculus interleukin enhancer binding factor 3 (Ilf3), transcript variant 3, mRNA,	MPHOSPH4; NF90
ILMN_1213728	Fam118a	30.8827	29.1438	66.1162	55.0031	38.3356	27.5008	0.943693	0.831916	1	0.71737	Mus musculus family with sequence similarity 118, member A (Fam118a), transcript variant 2, mRNA,	C230014M12Rik
ILMN_3058077	Nhp2l1	258.792	151.539	521.506	341.312	358.167	256.944	0.585561	0.654473	1	0.717385	Mus musculus NHP2 non-histone chromosome protein 2-like 1 (S, cerevisiae) (Nhp2l1), mRNA,	FA-1; Fta1; Ssfa1
ILMN_2870883	Yrdc	254.686	143.587	430.784	250.263	297.719	213.592	0.56378	0.580947	1	0.717429	Mus musculus yrdC domain containing (E,coli) (Yrdc), mRNA,	BC023823; IRIP; ITIP; AV303379; MGC38336
ILMN_2469310	Tmprss6	27.941	29.2235	29.968	31.3748	29.3092	21.0275	1.0459	1.04694	1	0.717438
ILMN_1224247	Svil	31.5798	31.1813	49.1033	44.3378	46.3522	33.2589	0.98738	0.902948	1	0.717527	Mus musculus supervillin (Svil), transcript variant 1, mRNA,	B430302E16Rik; AU024053
ILMN_1259355	Ccdc117	217.445	216.351	628.935	464.301	326.161	234.088	0.994971	0.738233	1	0.717707	Mus musculus coiled-coil domain containing 117 (Ccdc117), mRNA,	BC018601; AU042822; AU018638; 1110004K02Rik; 1700026O03Rik; AV173073; MGC30640; RP23-288K19,5
ILMN_1220846	Ccdc85b	414.573	426.448	332.467	290.683	329.629	236.601	1.02864	0.87432	1	0.71778	Mus musculus coiled-coil domain containing 85B (Ccdc85b), mRNA,	MGC67311; AI842788
ILMN_1248854	Ick	109.128	120.176	225.488	214.822	133.457	95.7961	1.10124	0.952699	1	0.717803	Mus musculus intestinal cell kinase (Ick), mRNA,	AI848300; 2210420N10Rik
ILMN_1233969	Akap1	23.6631	23.7954	29.6965	24.9499	25.9362	18.6196	1.00559	0.840163	1	0.717902	Mus musculus A kinase (PRKA) anchor protein 1 (Akap1), nuclear gene encoding mitochondrial protein, transcript variant 2, mRNA,	C76494; AKAP121; C81186; Akap; AKAP84; S-AKAP84
ILMN_2592810	Map3k3	221.509	371.595	161.193	160.799	130.419	93.663	1.67756	0.997554	1	0.718171	Mus musculus mitogen-activated protein kinase kinase kinase 3 (Map3k3), mRNA,	KIAA4031; AW548911; MAPKKK3; mKIAA4031; Mekk3
ILMN_2936468	5730596K20Rik	55.3096	62.0473	97.6839	112.466	58.6018	42.0864	1.12182	1.15133	1	0.718175	Mus musculus RIKEN cDNA 5730596K20 gene (5730596K20Rik), mRNA,	4633402C03Rik; AI465397; MGC28761
ILMN_1228470	Pdxp	466.95	586.517	614.188	391.501	525.462	377.394	1.25606	0.637429	1	0.718213	Mus musculus pyridoxal (pyridoxine, vitamin B6) phosphatase (Pdxp), mRNA,	1600027H05Rik; AB041662; PLPP
ILMN_2603689	Fmnl1	36.9662	25.9726	33.6494	25.1289	30.1853	21.6861	0.702603	0.746785	1	0.718433	Mus musculus formin-like 1 (Fmnl1), transcript variant 1, mRNA,	Fnrl; Frls; Fmnl; AI553564; 8030453N10Rik
ILMN_1236369	Usp12	38.2614	41.251	47.4118	39.205	50.0508	35.9623	1.07813	0.826905	1	0.718517	Mus musculus ubiquitin specific peptidase 12 (Usp12), mRNA,	Ubh1
ILMN_2998313	Cadps2	25.7328	25.3608	24.8121	25.8169	28.7733	20.6764	0.985541	1.0405	1	0.718595	Mus musculus Ca2+-dependent activator protein for secretion 2 (Cadps2), mRNA,	Cpd2; Caps2; A230044C21Rik
ILMN_1230087	Psme4	34.084	33.9326	38.8756	36.2829	30.5344	21.943	0.995557	0.933308	1	0.718632	Mus musculus proteasome (prosome, macropain) activator subunit 4 (Psme4), mRNA,	AA409398; TEMO; AU041366; KIAA0077; mKIAA0077
ILMN_2679823	1110059P08Rik	50.5272	37.5405	91.3861	68.2547	58.8005	42.2684	0.742976	0.746883	1	0.718844
ILMN_2712018	Bag1	3292.96	3071.05	6361.01	6492.38	3093.95	2224.14	0.932609	1.02065	1	0.718867	Mus musculus Bcl2-associated athanogene 1 (Bag1), mRNA,	Rap46
ILMN_2745532	Ncaph2	133.424	134.496	254.236	220.412	146.041	104.986	1.00804	0.866957	1	0.718877	Mus musculus non-SMC condensin II complex, subunit H2 (Ncaph2), mRNA,	D15Ertd785e; AI255179; 2610524G04Rik; 0610010J20Rik; MGC6766
ILMN_1233931	Dnajc2	185.973	97.6607	735.173	312.998	222.447	159.917	0.525134	0.425747	1	0.718896	Mus musculus DnaJ (Hsp40) homolog, subfamily C, member 2 (Dnajc2), mRNA,	AU020218; Zrf1; Zrf2; MIDA1
ILMN_2821254	Rbm10	59.0419	55.7156	67.5834	57.4316	51.4987	37.0263	0.943661	0.849788	1	0.718975	Mus musculus RNA binding motif protein 10 (Rbm10), mRNA,	E430039K10Rik; mKIAA0122; MGC7826
ILMN_2611244	Ecd	1570.29	797.092	2018.23	1389.1	1172.3	843.048	0.507607	0.688278	1	0.719138	Mus musculus ecdysoneless homolog (Drosophila) (Ecd), mRNA,	5730461K03Rik; Hsgt1
ILMN_1215692	Polr3d	82.0703	61.5031	118.192	68.6354	77.9801	56.0819	0.749395	0.580713	1	0.719182	Mus musculus polymerase (RNA) III (DNA directed) polypeptide D (Polr3d), mRNA,	BN51T; 44kDa; TSBN51; AI326118; RPC4; 2810426M17Rik; AW489084
ILMN_2684693	Dusp3	58.3278	51.5125	50.4431	46.5295	42.6598	30.6805	0.883156	0.922417	1	0.719188	Mus musculus dual specificity phosphatase 3 (vaccinia virus phosphatase VH1-related) (Dusp3), mRNA,	VHR; 2210015O03Rik; T-DSP11; 5031436O03Rik
ILMN_2838492	Styx	1556.38	1437.59	1673.01	1458.61	1196.73	860.875	0.923677	0.87185	1	0.719357	Mus musculus serine/threonine/tyrosine interaction protein (Styx), mRNA,	hStyxb; 0610039A20Rik; MGC106795
ILMN_2733026	Ubox5	217.017	207.344	414.437	340.891	235.215	169.211	0.955425	0.822539	1	0.719389	Mus musculus U box domain containing 5 (Ubox5), mRNA,	Ube7ip5; 1500010O06Rik; C330018L13Rik; Rnf37; Ubce7ip5; UIP5
ILMN_2694381	Dnajc7	895.942	829.948	1372.24	1308.78	966.349	695.183	0.92634	0.953754	1	0.719391
ILMN_2604501	Clec1a	28.2909	31.8344	30.9492	29.4775	30.3329	21.8348	1.12525	0.952446	1	0.719841	Mus musculus C-type lectin domain family 1, member a (Clec1a), mRNA,	5930406N14Rik
ILMN_1253155	Dcbld1	90.248	71.5949	193.995	122.011	117.117	84.3075	0.793313	0.628937	1	0.719857	Mus musculus discoidin, CUB and LCCL domain containing 1 (Dcbld1), mRNA,	4631413K11Rik
ILMN_2592174	Mis12	31.1218	30.0195	54.9143	45.0379	33.45	24.0792	0.964579	0.820149	1	0.719857	Mus musculus MIS12 homolog (yeast) (Mis12), mRNA,	AU044651; Misc12; 2510025F08Rik; RP23-83I13,9
ILMN_3009521	Foxred2	40.8711	37.8228	39.7698	37.5993	50.9104	36.6497	0.925418	0.945425	1	0.719887	Mus musculus FAD-dependent oxidoreductase domain containing 2 (Foxred2), mRNA,	Gm304; D15Bwg0759e; A430097D04Rik
ILMN_3090530	Ppp2r1b	33.291	32.7115	64.7255	45.6175	31.6994	22.8207	0.982594	0.704783	1	0.719911	Mus musculus protein phosphatase 2 (formerly 2A), regulatory subunit A (PR 65), beta isoform (Ppp2r1b), transcript variant 2, mRNA,	AI790395; 2410091N08Rik
ILMN_1245987	Hnrnpk	264.314	255.616	1398.76	2115.87	970.314	698.572	0.967094	1.51267	1	0.719944	Mus musculus heterogeneous nuclear ribonucleoprotein K (Hnrnpk), mRNA,	hnRNPK; MGC102032; NOVA
ILMN_2606564	Atic	159.409	88.469	494.405	212.895	195.223	140.56	0.55498	0.430608	1	0.72	Mus musculus 5-aminoimidazole-4-carboxamide ribonucleotide formyltransferase/IMP cyclohydrolase (Atic), mRNA,	AA536954; AW212393; 2610509C24Rik
ILMN_2668114	Magoh	558.939	263.928	579.867	369.855	559.609	402.976	0.472195	0.637827	1	0.720103	Mus musculus mago-nashi homolog, proliferation-associated (Drosophila) (Magoh), mRNA,	Mago-m
ILMN_2711442	Galt	50.4862	55.4631	68.4144	79.0113	44.9403	32.3723	1.09858	1.15489	1	0.720339	Mus musculus galactose-1-phosphate uridyl transferase (Galt), mRNA,	AW553376
ILMN_2720763	BC025546	212.1	185.935	445.426	356.36	292.119	210.438	0.876641	0.800043	1	0.720383	Mus musculus cDNA sequence BC025546 (BC025546), mRNA,	MGC38131; AU022703; C730036L12Rik
ILMN_2977535	D930015E06Rik	526.394	380.193	304.748	131.877	413.901	298.207	0.722258	0.432742	1	0.72048	Mus musculus RIKEN cDNA D930015E06 gene (D930015E06Rik), mRNA,	mKIAA0922
ILMN_2970742	Rnf170	39.3044	46.7242	54.0556	71.6572	47.3335	34.1031	1.18878	1.32562	1	0.720486	Mus musculus ring finger protein 170 (Rnf170), mRNA,	MGC118197; 6720407G21Rik
ILMN_2678421	Pcolce2	32.4881	29.6212	101.215	40.2764	31.8295	22.9334	0.911753	0.397929	1	0.720506	Mus musculus procollagen C-endopeptidase enhancer 2 (Pcolce2), mRNA,	Pcpe2; 2400001O18Rik
ILMN_1216233	Sart3	64.9186	55.1347	58.1921	38.2813	57.4344	41.3899	0.849291	0.657842	1	0.720646	Mus musculus squamous cell carcinoma antigen recognized by T-cells 3 (Sart3), mRNA,	AU045857; mKIAA0156
ILMN_2698652	Smyd5	55.0421	37.8126	98.0854	38.7579	43.6103	31.4288	0.686976	0.395144	1	0.720673	Mus musculus SET and MYND domain containing 5 (Smyd5), mRNA,	Rai15; MGC29044; Rrg1; AW536703; NN8-4AG
ILMN_1216394	Pdcd6ip	51.7695	57.787	45.209	45.9709	55.3795	39.9197	1.11624	1.01685	1	0.720839	Mus musculus programmed cell death 6 interacting protein (Pdcd6ip), mRNA,	AI480591; mKIAA1375; C76364; AIP1; Eig2; AW544830; Alix
ILMN_2675072	Ahsa1	668.315	391.022	1348.99	701.088	728.633	525.243	0.585087	0.519713	1	0.720861	Mus musculus AHA1, activator of heat shock protein ATPase homolog 1 (yeast) (Ahsa1), mRNA,	MGC36589; p38; MGC36618; BC023857
ILMN_1224268	Mrps15	159.852	144.866	345.445	290.677	189.608	136.688	0.906256	0.841457	1	0.7209	Mus musculus mitochondrial ribosomal protein S15 (Mrps15), nuclear gene encoding mitochondrial protein, mRNA,	Mprs15; 1500003E24Rik; 2410002B11Rik
ILMN_1224713	Adap1	87.6341	34.1919	80.5783	30.4468	42.2863	30.4888	0.390167	0.377854	1	0.72101	Mus musculus ArfGAP with dual PH domains 1 (Adap1), mRNA,	4930431P11Rik; GC1L; p42IP4
ILMN_1214118	Plekha2	1138.92	284.212	1908.02	644.736	1544.1	1113.51	0.249545	0.337908	1	0.721135	Mus musculus pleckstrin homology domain-containing, family A (phosphoinositide binding specific) member 2 (Plekha2), mRNA,	W91773; AI851530; TAPP2; AU041791; 6430512N22Rik
ILMN_1229318	Pdk1	320.536	443.849	984.495	747.809	702.567	506.658	1.38471	0.759587	1	0.721152	Mus musculus pyruvate dehydrogenase kinase, isoenzyme 1 (Pdk1), nuclear gene encoding mitochondrial protein, mRNA,	D530020C15Rik; B830012B01
ILMN_2617971	Minpp1	30.2719	30.1024	72.187	61.9568	38.9294	28.0751	0.9944	0.858282	1	0.721178	Mus musculus multiple inositol polyphosphate histidine phosphatase 1 (Minpp1), mRNA,	AA408516
ILMN_2594165	2510040D07Rik	47.2029	49.2195	62.1702	48.6631	46.5613	33.5852	1.04272	0.78274	1	0.721311
ILMN_3024456	Timeless	33.8794	32.752	37.2561	28.2583	27.4941	19.834	0.966723	0.758486	1	0.721392	Mus musculus timeless homolog (Drosophila) (Timeless), transcript variant 2, mRNA,	tim; C77407; Debt69
ILMN_2994173	Hccs	119.443	66.1642	278.176	139.214	121.777	87.8508	0.553939	0.500452	1	0.721408	Mus musculus holocytochrome c synthetase (Hccs), mRNA,
ILMN_2594477	Papss1	84.4111	131.554	125.531	202.68	118.617	85.5831	1.55849	1.61458	1	0.721505	Mus musculus 3'-phosphoadenosine 5'-phosphosulfate synthase 1 (Papss1), mRNA,	SK1; AI325286; Asapk
ILMN_2622345	Dyrk1a	46.5337	48.3698	104.054	73.0224	53.537	38.6303	1.03946	0.701771	1	0.721562	Mus musculus dual-specificity tyrosine-(Y)-phosphorylation regulated kinase 1a (Dyrk1a), mRNA,	Mnbh; mmb; D16Ertd272e; MGC150254; 2310043O08Rik; MGC150253; Dyrk; D16Ertd493e
ILMN_1232280	A930025D01Rik	120.41	138.84	158.897	211.563	123.458	89.0879	1.15305	1.33145	1	0.721606	Mus musculus RIKEN cDNA A930025D01 gene (A930025D01Rik), mRNA,	AI480484
ILMN_2618408	Icam2	450.995	291.718	455.935	530.015	405.039	292.377	0.646832	1.16248	1	0.721848	Mus musculus intercellular adhesion molecule 2 (Icam2), mRNA,	Icam-2; CD102; Ly-60
ILMN_1249783	Atp5c1	2794.76	2156.56	4358.6	3839.9	2341.59	1690.31	0.771643	0.880994	1	0.721865	Mus musculus ATP synthase, H+ transporting, mitochondrial F1 complex, gamma polypeptide 1 (Atp5c1), mRNA,	1700094F02Rik
ILMN_1223808	Csnk2a1	32.3662	37.2242	53.5339	52.932	37.0618	26.7632	1.15009	0.988757	1	0.722122	Mus musculus casein kinase 2, alpha 1 polypeptide (Csnk2a1), mRNA,	Csnk2a1-rs4; MGC102141
ILMN_2707947	Pms2	96.3716	93.0807	206.089	115.659	117.04	84.543	0.965852	0.561209	1	0.722346	Mus musculus postmeiotic segregation increased 2 (S, cerevisiae) (Pms2), mRNA,	AW555130; Pmsl2
ILMN_1242500	Rhot1	408.256	441.202	930.814	1003.08	471.216	340.385	1.0807	1.07764	1	0.722354	Mus musculus ras homolog gene family, member T1 (Rhot1), mRNA,	AF244542; C430039G08Rik; Arht1; 2210403N23Rik; AI834919; AA415293; Miro1; FLJ11040
ILMN_2616000	5730449L18Rik	524.167	501.024	921.139	816.425	527.281	380.909	0.955849	0.88632	1	0.722402	Mus musculus RIKEN cDNA 5730449L18 gene (5730449L18Rik), mRNA,	AL023077
ILMN_2831579	Kctd5	189.339	205.88	312.074	305.575	261.676	189.06	1.08736	0.979174	1	0.722496	Mus musculus potassium channel tetramerisation domain containing 5 (Kctd5), mRNA,	2610030N08Rik; mKIAA0176
ILMN_3138674	Aebp2	53.2101	60.7425	163.002	155.647	80.5652	58.2357	1.14156	0.95488	1	0.722839	Mus musculus AE binding protein 2 (Aebp2), transcript variant 3, mRNA,	B230313N05Rik
ILMN_2839134	Rhot2	107.353	102.609	91.2182	78.6715	72.6542	52.5191	0.955813	0.862453	1	0.722864	Mus musculus ras homolog gene family, member T2 (Rhot2), nuclear gene encoding mitochondrial protein, mRNA,	MGC31216; Arht2; Miro2
ILMN_1258372	Pex11b	457.501	336.614	817.899	785.595	564.15	407.816	0.735767	0.960503	1	0.722887	Mus musculus peroxisomal biogenesis factor 11b (Pex11b), mRNA,
ILMN_2802714	Pgam5	398.424	266.167	1053.52	608.807	514.566	372.039	0.66805	0.577879	1	0.723016	Mus musculus phosphoglycerate mutase family member 5 (Pgam5), mRNA,	2610528A17Rik
ILMN_1237236	Aof1	30.1207	28.6196	56.014	36.8458	41.9584	30.3444	0.950164	0.657797	1	0.723202	Mus musculus amine oxidase, flavin containing 1 (Aof1), mRNA,	4632428N09Rik; AI482520; MGC38211
ILMN_1243717	Opa1	29.1486	28.2061	68.8547	45.1086	38.0311	27.5044	0.967668	0.655128	1	0.723207	Mus musculus optic atrophy 1 homolog (human) (Opa1), nuclear gene encoding mitochondrial protein, mRNA,	AI847218; AI225888; mKIAA0567; 1200011N24Rik
ILMN_2737710	Tiam1	98.9214	115.163	225.585	185.442	142.496	103.081	1.16419	0.822049	1	0.723393	Mus musculus T-cell lymphoma invasion and metastasis 1 (Tiam1), mRNA,	D16Ium10; AI847750; D16Ium10e
ILMN_1250774	Mdm2	351.777	414.403	601.545	762.302	364.527	263.709	1.17803	1.26724	1	0.723429	Mus musculus transformed mouse 3T3 cell double minute 2 (Mdm2), mRNA,	1700007J15Rik; AA415488; Mdm-2
ILMN_2880634	Nola2	89.3223	45.3911	121.863	49.2959	59.2631	42.8794	0.508172	0.404518	1	0.723543	Mus musculus nucleolar protein family A, member 2 (Nola2), mRNA,	Nhp2; D11Ertd175e; 2410130M07Rik
ILMN_2967294	Dgcr6	286.402	269.675	201.25	280.33	232.85	168.484	0.941595	1.39294	1	0.723573	Mus musculus DiGeorge syndrome critical region gene 6 (Dgcr6), mRNA,	AU044152
ILMN_1250856	Kpna1	146.255	121.248	469.363	372.243	146.07	105.707	0.829022	0.793081	1	0.723676	Mus musculus karyopherin (importin) alpha 1 (Kpna1), mRNA,	Rch2; AW494490; NPI1; IPOA5; mSRP1
ILMN_1246153	Erdr1	654.58	2170.31	660.702	1769.83	582.301	421.401	3.31557	2.67871	1	0.723684	Mus musculus erythroid differentiation regulator 1 (Erdr1), mRNA,	edr; MGC5764
ILMN_2817996	Ppa2	362.112	149.414	827.686	485.172	432.468	312.971	0.412619	0.586179	1	0.723686	Mus musculus pyrophosphatase (inorganic) 2 (Ppa2), nuclear gene encoding mitochondrial protein, mRNA,	MGC6539; Sid6306; 1110013G13Rik
ILMN_2667144	Endogl1	32.9254	31.0427	77.8939	67.8751	37.9814	27.4876	0.942819	0.87138	1	0.723713	Mus musculus endonuclease G-like 1 (Endogl1), mRNA,	ENGL; AW557704; ENGL-B; ENGL-a; ENDOGL2; 4732466J24
ILMN_2974069	Slc35a3	58.7989	49.5176	184.506	195.375	120.67	87.3478	0.842152	1.05891	1	0.723858	Mus musculus solute carrier family 35 (UDP-N-acetylglucosamine (UDP-GlcNAc) transporter), member 3 (Slc35a3), mRNA,	2310050P13Rik; MGC36317
ILMN_2621949	Bat4	29.069	28.0035	24.7249	25.9209	26.6058	19.2609	0.963343	1.04837	1	0.723936	Mus musculus HLA-B associated transcript 4 (Bat4), mRNA,	Bat-4; G5; D17H6S54E
ILMN_1251585	E130309D02Rik	107.592	72.4822	105.433	55.8104	75.4941	54.6762	0.673676	0.529343	1	0.724245	Mus musculus RIKEN cDNA E130309D02 gene (E130309D02Rik), mRNA,	A630028N22
ILMN_2869461	Tbp	142.117	109.543	332.494	231.591	194.652	141.006	0.770794	0.696529	1	0.724401	Mus musculus TATA box binding protein (Tbp), mRNA,	SCA17; mTBP; TFIID; GTF2D1; Gtf2d
ILMN_2949596	Dpysl2	437.912	296.217	1127.51	1055.81	701.438	508.15	0.676429	0.936402	1	0.72444	Mus musculus dihydropyrimidinase-like 2 (Dpysl2), mRNA,	TOAD-64; Musunc33; DRP2; Ulip2; Crmp2; AI851130
ILMN_3148398	Eprs	104.623	85.4601	355.706	342.277	164.312	119.037	0.816838	0.962247	1	0.724457	Mus musculus glutamyl-prolyl-tRNA synthetase (Eprs), mRNA, XM_899642 XM_899647 XM_899651 XM_899655 XM_899659 XM_899665 XM_916645	Qprs; 2410081F06Rik; 3010002K18Rik; C79379
ILMN_3079421	Pde6d	78.7966	58.0826	131.175	169.27	181.379	131.412	0.737121	1.29041	1	0.724516	Mus musculus phosphodiesterase 6D, cGMP-specific, rod, delta (Pde6d), mRNA,	AI841218
ILMN_1228426	6330503K22Rik	106.411	70.9855	260.53	170.775	137.355	99.5246	0.667087	0.65549	1	0.724578	Mus musculus RIKEN cDNA 6330503K22 gene (6330503K22Rik), mRNA,	AA415922; AW557948; AI427129
ILMN_2955356	Appbp1	584.736	618.486	1138.99	1266.87	702.129	508.836	1.05772	1.11228	1	0.724704	Mus musculus amyloid beta precursor protein binding protein 1 (Appbp1), mRNA,	59kDa; MGC36437; MGC36630; MGC29435
ILMN_2946905	Slc25a38	355.8	263.562	525.254	560.93	289.19	209.605	0.740758	1.06792	1	0.724799	Mus musculus solute carrier family 25, member 38 (Slc25a38), mRNA,	AV019094; BC010801; MGC18873
ILMN_1226332	Siah2	45.5032	40.8079	80.5433	55.6679	58.5477	42.4371	0.896815	0.691155	1	0.72483	Mus musculus seven in absentia 2 (Siah2), mRNA,	Sinh2; AA415433
ILMN_2616565	Slc2a3	154.165	65.514	455.915	264.369	197.54	143.188	0.424961	0.579865	1	0.724858	Mus musculus solute carrier family 2 (facilitated glucose transporter), member 3 (Slc2a3), mRNA,	C78366; AA408729; Glut3; Glut-3; AL024341; AL023014; AU040424
ILMN_2903351	Leo1	152.962	135.779	261.736	278.796	134.847	97.7577	0.887667	1.06518	1	0.724951	Mus musculus Leo1, Paf1/RNA polymerase II complex component, homolog (S, cerevisiae) (Leo1), mRNA,	MGC102277; Gm185; MGC100232
ILMN_1220263	5730453I16Rik	39.9443	41.9146	65.3881	80.0027	43.7763	31.7382	1.04933	1.22351	1	0.725008	Mus musculus RIKEN cDNA 5730453I16 gene (5730453I16Rik), mRNA,	C330017N18Rik; MGC46982; AL022757
ILMN_2698589	Cstf2	467.189	266.09	1472.88	979.292	624.493	452.769	0.569555	0.664882	1	0.725019	Mus musculus cleavage stimulation factor, 3' pre-RNA subunit 2 (Cstf2), mRNA,	Cstf64; 64kDa; C630034J23Rik
ILMN_1219942	Fdxr	99.3597	84.7792	127.995	81.1021	74.9843	54.3663	0.853255	0.633633	1	0.725036	Mus musculus ferredoxin reductase (Fdxr), nuclear gene encoding mitochondrial protein, mRNA,
ILMN_2754015	Ino80c	58.6852	40.8325	118.119	121.096	70.1086	50.8366	0.695789	1.0252	1	0.725112	Mus musculus INO80 complex subunit C (Ino80c), mRNA,
ILMN_1248125	Ccdc51	63.4993	61.3036	81.1126	90.4306	69.0495	50.0844	0.965422	1.11488	1	0.72534	Mus musculus coiled-coil domain containing 51 (Ccdc51), mRNA,	MGC151163; 5730568A12Rik; MGC151165; AI551049
ILMN_2759669	Scaf1	142.738	197.188	77.0532	64.4278	85.4326	61.9919	1.38147	0.836147	1	0.725623	Mus musculus SR-related CTD-associated factor 1 (Scaf1), mRNA,	SR-A1; MGC109685
ILMN_3005873	Sort1	40.366	75.122	74.6409	233.839	35.4441	25.7216	1.86102	3.13285	1	0.725696	Mus musculus sortilin 1 (Sort1), mRNA,	Ntr3; Ntsr3; AI852375; 2900053A11Rik
ILMN_2682362	Gemin4	1073.1	600.252	1519.17	690.008	756.669	549.209	0.559364	0.454202	1	0.725824	Mus musculus gem (nuclear organelle) associated protein 4 (Gemin4), mRNA,	AU015359; MGC28146; 4932415L08Rik
ILMN_1254924	Gipc1	47.3506	71.2157	52.6524	121.674	66.2022	48.0516	1.50401	2.31089	1	0.725831	Mus musculus GIPC PDZ domain containing family, member 1 (Gipc1), mRNA,	TIP-2; Rgs19ip1; Semcap1; TaxIP2; GIPC; Glut1CIP
ILMN_1229545	Ncoa6	61.5477	46.9123	80.0975	75.1312	99.9989	72.5986	0.762211	0.937996	1	0.725994	Mus musculus nuclear receptor coactivator 6 (Ncoa6), mRNA,	AIB3; mKIAA0181; ASC2; ASC-2; RAP250; Ncoa7; PRIP; NRC; MGC90663
ILMN_3023749	Glrx2	31.1606	27.533	25.7296	26.7611	27.7628	20.1584	0.883582	1.04009	1	0.726094	Mus musculus glutaredoxin 2 (thioltransferase) (Glrx2), transcript variant 3, mRNA,	1700010P22Rik; AI645710; Grx2
ILMN_2646380	Gabpb1	77.8335	69.2987	189.968	114.403	89.1141	64.7158	0.890345	0.602225	1	0.726213
ILMN_2703023	Fcho1	673.177	607.447	920.059	934.34	961.855	698.633	0.902359	1.01552	1	0.726339	Mus musculus FCH domain only 1 (Fcho1), mRNA,	3322402E17Rik; KIAA0290; N28152
ILMN_2704927	AI480653	109.317	92.3108	267.415	153.832	154.459	112.225	0.844431	0.575256	1	0.726571	Mus musculus expressed sequence AI480653 (AI480653), mRNA,	MGC19367
ILMN_2678431	Mns1	1359.6	1942.83	1492.41	925.777	1164.96	846.511	1.42897	0.620323	1	0.726646	Mus musculus meiosis-specific nuclear structural protein 1 (Mns1), mRNA,	AW546487
ILMN_2679662	Tada1l	171.5	141.434	589.846	470.232	268.151	194.866	0.824686	0.79721	1	0.726703	Mus musculus transcriptional adaptor 1 (HFI1 homolog, yeast) like (Tada1l), mRNA,	2900026B15Rik; Staf42; D1Ertd251e
ILMN_1237507	Dlst	765.656	699.501	877.195	728.63	547.767	398.216	0.913597	0.830637	1	0.726981	Mus musculus dihydrolipoamide S-succinyltransferase (E2 component of 2-oxo-glutarate complex) (Dlst), mRNA,	4930529O08Rik; DLTS; 1600017E01Rik; 4632413C10Rik
ILMN_2852925	Higd1b	28.3858	25.1082	26.3492	25.1108	24.707	17.9655	0.884536	0.953002	1	0.727142	Mus musculus HIG1 domain family, member 1B (Higd1b), mRNA,	2310056K19Rik; RP23-463E7,1
ILMN_2594376	Yy2	25.0392	25.2758	47.6787	34.2393	33.7714	24.5574	1.00945	0.718126	1	0.727167	Mus musculus Yy2 transcription factor (Yy2), mRNA,
ILMN_2649083	Clns1a	83.6094	57.9378	321.884	183.975	179.102	130.281	0.692958	0.571558	1	0.727415	Mus musculus chloride channel, nucleotide-sensitive, 1A (Clns1a), mRNA,	ICLN; Clci; 2610100O04Rik; 2610036D06Rik; Clcni
ILMN_2729762	D930014E17Rik	39.4472	27.0905	62.2167	40.7916	40.7801	29.6659	0.686754	0.655638	1	0.72746	Mus musculus RIKEN cDNA D930014E17 gene (D930014E17Rik), mRNA,	ICRFP703B1614Q5,6; D7H11orf17; BCA3; C11orf17; ORF27
ILMN_3000108	Lsm6	353.789	276.645	743.995	743.905	444.099	323.067	0.781947	0.999879	1	0.727466	Mus musculus LSM6 homolog, U6 small nuclear RNA associated (S, cerevisiae) (Lsm6), mRNA, XM_990335	2410088K19Rik; MGC117708; AI747288; 1500031N17Rik
ILMN_1213307	Ctdsp1	87.965	68.0316	98.9594	85.279	90.0456	65.5371	0.773394	0.861758	1	0.727821	Mus musculus CTD (carboxy-terminal domain, RNA polymerase II, polypeptide A) small phosphatase 1 (Ctdsp1), mRNA,	NLIIF; Nif3; GIP; SCP1
ILMN_1229238	Mtch2	563.519	371.723	1335.91	1225.49	1040.33	757.261	0.659647	0.917346	1	0.727902	Mus musculus mitochondrial carrier homolog 2 (C, elegans) (Mtch2), nuclear gene encoding mitochondrial protein, mRNA,	4930539J07Rik; 2310034D24Rik; HSPC032
ILMN_3161897	Dync1li2	58.4831	69.9419	116.942	180.381	87.2907	63.555	1.19593	1.54249	1	0.728085	Mus musculus dynein, cytoplasmic 1 light intermediate chain 2 (Dync1li2), mRNA,	C920003I06; Dncli2; LIC2; Dnclic2; AA409702
ILMN_2980063	Flii	122.272	101.234	119.141	69.5999	106.896	77.834	0.827942	0.584182	1	0.728127	Mus musculus flightless I homolog (Drosophila) (Flii), mRNA,	3632430F08Rik; Fliih; Fli1
ILMN_1232596	Pom121	101.913	143.089	427.181	429.277	199.223	145.066	1.40404	1.00491	1	0.728157	Mus musculus nuclear pore membrane protein 121 (Pom121), mRNA,	mKIAA0618; 2610027A18Rik; C80273
ILMN_2976601	Tfg	437.707	392.917	657.079	541.184	480.774	350.08	0.897671	0.82362	1	0.728158	Mus musculus Trk-fused gene (Tfg), mRNA,	AI173908
ILMN_1239698	Puf60	3410.76	4335.01	3689.03	3847.55	3156.23	2298.3	1.27098	1.04297	1	0.728178	Mus musculus poly-U binding splicing factor 60 (Puf60), transcript variant 2, mRNA,	SIAHBP1; 2810454F19Rik; 2410104I19Rik
ILMN_1245994	Flna	141.666	132.216	99.9316	87.4146	127.568	92.893	0.933294	0.874744	1	0.728183	Mus musculus filamin, alpha (Flna), mRNA, XM_920635 XM_920660	Dilp2; ABP-280; F730004A14Rik; Fln1
ILMN_2666582	Ninj1	36.6729	28.3046	47.1835	40.4104	34.7509	25.3072	0.771813	0.856454	1	0.728246
ILMN_2889916	Klf16	140.731	103.733	199.303	107.413	134.14	97.7174	0.737096	0.538941	1	0.728473	Mus musculus Kruppel-like factor 16 (Klf16), mRNA,	BTEB4; AI843742; DRRF
ILMN_2731963	Fmo3	28.7431	29.2045	23.685	25.1075	28.6216	20.8501	1.01605	1.06006	1	0.728475	Mus musculus flavin containing monooxygenase 3 (Fmo3), mRNA,	AW111792
ILMN_2693454	Tsr2	58.6121	48.9446	137.955	100.383	90.747	66.1077	0.835061	0.727651	1	0.728484	Mus musculus TSR2, 20S rRNA accumulation, homolog (S, cerevisiae) (Tsr2), mRNA,	2310007F12Rik
ILMN_1252689	2010106G01Rik	62.2483	48.9999	173.143	196.792	58.1074	42.3325	0.787168	1.13659	1	0.728522	Mus musculus RIKEN cDNA 2010106G01 gene (2010106G01Rik), mRNA,	C130089K23Rik; Sppl2A
ILMN_2453209	Abhd11	558.595	396.037	424.797	296.459	386.536	281.601	0.708987	0.697883	1	0.728526	Mus musculus abhydrolase domain containing 11 (Abhd11), mRNA,	Wbscr21; 1110054D16Rik; A630008N09Rik
ILMN_2797594	Patz1	47.9784	53.9318	45.3782	40.4686	44.5558	32.4634	1.12409	0.891808	1	0.728601	Mus musculus POZ (BTB) and AT hook containing zinc finger 1 (Patz1), mRNA,	Patz; 8430401L15Rik; Zfp278; Mazr; AI447519
ILMN_2655954	Gpam	37.5257	44.3106	78.5435	66.9597	56.4655	41.1552	1.18081	0.852517	1	0.728857	Mus musculus glycerol-3-phosphate acyltransferase, mitochondrial (Gpam), nuclear gene encoding mitochondrial protein, mRNA,	GPAT1; GPAT
ILMN_2648409	Cmtm7	584.686	309.883	316.271	296.174	372.867	271.813	0.529999	0.936458	1	0.728982	Mus musculus CKLF-like MARVEL transmembrane domain containing 7 (Cmtm7), mRNA,	AI481279; Cklfsf7
ILMN_1224077	Vav1	535.6	273.77	643.514	725.507	468.632	341.629	0.511146	1.12741	1	0.72899	Mus musculus vav 1 oncogene (Vav1), mRNA,	Vav; vav-T
ILMN_2618396	Pter	23.4174	27.8322	54.2737	36.2037	26.7019	19.4669	1.18852	0.667057	1	0.729045	Mus musculus phosphotriesterase related (Pter), mRNA,	AI790318; Mpr56-1
ILMN_2727536	LOC100048413	480.148	569.44	714.276	785.107	532.71	388.437	1.18597	1.09917	1	0.72917	PREDICTED: Mus musculus similar to Myeloid leukemia factor 2 (LOC100048413), mRNA,
ILMN_2674324	Thop1	552.165	459.392	942.126	412.666	338.76	247.02	0.831984	0.438016	1	0.729189	Mus musculus thimet oligopeptidase 1 (Thop1), mRNA,	AI131655; AI327041; EP24,15
ILMN_2876575	Ubxn6	98.1438	127.685	154.988	264.558	101.633	74.1106	1.301	1.70696	1	0.7292	Mus musculus UBX domain protein 6 (Ubxn6), mRNA,	Ubxdc2; 2210415J11Rik; AU040909; 1200008L11Rik
ILMN_1258334	Tor1a	52.2447	53.3548	93.0868	93.4516	62.6108	45.6562	1.02125	1.00392	1	0.729206	Mus musculus torsin family 1, member A (torsin A) (Tor1a), mRNA,	Dyt1; torsinA; MGC18883; DQ2
ILMN_2736360	2610002J02Rik	221.252	200.643	370.73	418.012	285.319	208.06	0.906851	1.12754	1	0.729219	Mus musculus RIKEN cDNA 2610002J02 gene (2610002J02Rik), mRNA,
ILMN_2503651	Usp9x	29.9239	39.8799	64.2313	78.8788	31.589	23.037	1.33271	1.22804	1	0.729271	Mus musculus ubiquitin specific peptidase 9, X chromosome (Usp9x), mRNA,	AA407302; 5730589N07Rik; FAF-X; AA407699; Dffrx; Fafl; AL022658; AL022749
ILMN_2617835	Myo9b	185.417	240.875	172.049	283.204	202.37	147.599	1.2991	1.64607	1	0.729352	Mus musculus myosin IXb (Myo9b), mRNA,
ILMN_2506061	Ubtf	35.4351	31.5105	33.446	32.7007	29.6956	21.6616	0.889245	0.977718	1	0.729457	Mus musculus upstream binding transcription factor, RNA polymerase I (Ubtf), transcript variant 1, mRNA,	UBF; A930005G04Rik; UBF1; Tcfubf; NOR-90
ILMN_2460168	Wdr1	193.401	151.616	179.11	165.357	178.597	130.283	0.78395	0.923214	1	0.729479	Mus musculus WD repeat domain 1 (Wdr1), mRNA,	D5Wsu185e
ILMN_2698259	Gtl3	54.6971	49.3883	185.154	159.963	87.3085	63.7119	0.902942	0.863947	1	0.729734	Mus musculus gene trap locus 3 (Gtl3), mRNA,	AL024127; T10-2A2; 2600014O15Rik
ILMN_1258357	Dok3	1563.94	398.682	1563.66	1243.93	1245.51	908.981	0.254922	0.795524	1	0.729804	Mus musculus docking protein 3 (Dok3), mRNA,	AI450713; MGC151299; Dokl
ILMN_3162224	l7Rn6	982.556	702.338	1283.64	1156.67	1424.66	1039.97	0.714807	0.901086	1	0.729977	Mus musculus lethal, Chr 7, Rinchik 6 (l7Rn6), mRNA,	0610007P06Rik; l(7)6Rn; 1110002N09Rik
ILMN_2602396	Dpy30	1602.1	828.561	1999.03	1232.64	1233.29	900.349	0.517171	0.61662	1	0.730037	Mus musculus dpy-30 homolog (C, elegans) (Dpy30), mRNA,	DPY30; C87842
ILMN_1246058	Ppp1ca	1641.88	968.578	3708.84	3846.92	3184.43	2324.78	0.589918	1.03723	1	0.730045	Mus musculus protein phosphatase 1, catalytic subunit, alpha isoform (Ppp1ca), mRNA,	dism2; Ppp1c
ILMN_1255592	Sfmbt1	68.4942	80.8625	52.3049	45.2473	31.2007	22.7781	1.18057	0.865068	1	0.730052	Mus musculus Scm-like with four mbt domains 1 (Sfmbt1), mRNA,	Smr; DKFZp434L243; Sfmbt
ILMN_2605268	Ubqln4	388.25	305.319	273.72	121.823	288.338	210.517	0.786398	0.445065	1	0.730103	Mus musculus ubiquilin 4 (Ubqln4), mRNA,	A1u; AI663987; UBIN
ILMN_2740176	LOC100048046	633	404.54	539.245	418.984	408.648	298.392	0.639085	0.776984	1	0.730194	PREDICTED: Mus musculus similar to SRp25 nuclear protein, transcript variant 1 (LOC100048046), mRNA,
ILMN_2616226	Dbp	452.182	352.211	519.714	506.997	599.061	437.473	0.778915	0.975531	1	0.730265	Mus musculus D site albumin promoter binding protein (Dbp), mRNA,
ILMN_1238661	Trappc3	92.1556	63.334	162.575	196.973	125.414	91.5891	0.687251	1.21158	1	0.730296	Mus musculus trafficking protein particle complex 3 (Trappc3), mRNA,	Bet3; 1110058K12Rik; AI835942; AU019197
ILMN_1246011	Wdr70	123.92	166.663	137.611	240.152	170.833	124.761	1.34493	1.74515	1	0.730308	PREDICTED: Mus musculus WD repeat domain 70, transcript variant 3 (Wdr70), mRNA,
ILMN_2603182	Tfam	262.857	212.046	725.061	562.007	355.153	259.508	0.806695	0.775117	1	0.730694	Mus musculus transcription factor A, mitochondrial (Tfam), mRNA,	Hmgts; mtTFA; tsHMG; AI661103
ILMN_2628828	Ppp1r12c	58.1356	54.8774	50.1535	39.9561	42.7446	31.2341	0.943954	0.796676	1	0.730715	Mus musculus protein phosphatase 1, regulatory (inhibitor) subunit 12C (Ppp1r12c), mRNA, XM_976362 XM_976397 XM_976435 XM_976476	B430101M08; AI839747; 2410197A17Rik; Mbs85
ILMN_1243908	Sh3gl1	89.1453	109.332	141.821	167.35	106.147	77.5695	1.22645	1.18	1	0.730777	Mus musculus SH3-domain GRB2-like 1 (Sh3gl1), mRNA,	SH3P8; Sh3d2b; EEN; C77078
ILMN_1256121	Zfp282	253.379	345.701	412.074	760.526	289.524	211.584	1.36436	1.84561	1	0.730799	Mus musculus zinc finger protein 282 (Zfp282), mRNA,	E430019K09Rik; MGC36603; HUB1; C81429; AI449432
ILMN_1233630	Enoph1	372.009	204.623	1134.51	400.436	396.008	289.417	0.55005	0.35296	1	0.730835	Mus musculus enolase-phosphatase 1 (Enoph1), mRNA,	BB183658; 2310057D15Rik; C81437
ILMN_2699989	Rps19bp1	148.366	102.008	117.569	86.0315	125.324	91.6231	0.687544	0.731753	1	0.731089	Mus musculus ribosomal protein S19 binding protein 1 (Rps19bp1), mRNA,	AI604923; S19BP; 2510038A11Rik
ILMN_2839303	Dph4	212.515	102.761	360.16	299.103	239.639	175.199	0.483549	0.830472	1	0.731094	Mus musculus DPH4 homolog (JJJ3, S, cerevisiae) (Dph4), mRNA,	Zcsl3; MmDjC7; AW240712; AV066965; 2610027M02Rik; 1700030A21Rik
ILMN_2943685	4833439L19Rik	46.5842	40.1279	95.169	68.2958	49.9873	36.5476	0.861404	0.717626	1	0.731139	Mus musculus RIKEN cDNA 4833439L19 gene (4833439L19Rik), mRNA,	C81457; 4930558H15Rik
ILMN_3161480	Fktn	51.3915	55.0037	80.5654	72.8985	56.1148	41.0323	1.07029	0.904836	1	0.73122	Mus musculus fukutin (Fktn), mRNA,	Fukutin; D830030O17Rik
ILMN_3001417	Alpk3	23.8024	27.5114	25.3975	23.7613	25.8306	18.893	1.15582	0.935573	1	0.731418	Mus musculus alpha-kinase 3 (Alpk3), mRNA,	D330016D04; MAK; Midori; KIAA1330; mKIAA1330; AW319487
ILMN_2516374	Yme1l1	24.1891	23.9543	86.6226	73.4553	27.4445	20.0759	0.990293	0.847992	1	0.731509	Mus musculus YME1-like 1 (S, cerevisiae) (Yme1l1), nuclear gene encoding mitochondrial protein, mRNA,	FtsH1; Ftsh
ILMN_2710429	A930008G19Rik	42.1935	37.9017	35.233	30.594	36.8676	26.9692	0.898282	0.868332	1	0.731516	Mus musculus RIKEN cDNA A930008G19 gene (A930008G19Rik), mRNA,	mKIAA0140; MGC40647
ILMN_2794686	Fam152b	384.973	270.323	914.957	514.58	385.322	281.897	0.702188	0.562409	1	0.731586	Mus musculus family with sequence similarity 152, member B (Fam152b), mRNA,	AI427858; AI850401
ILMN_2765032	Kcnn4	117.842	27.2431	171.708	34.5158	94.015	68.7845	0.231184	0.201015	1	0.731634	Mus musculus potassium intermediate/small conductance calcium-activated channel, subfamily N, member 4 (Kcnn4), mRNA,	IK1; SK4; KCA4; IKCA1; mIKCa1
ILMN_2715802	Hmga1	3724.73	2856.2	2658.95	973.8	2999.4	2194.74	0.766821	0.366234	1	0.731728	Mus musculus high mobility group AT-hook 1 (Hmga1), transcript variant 1, mRNA,	Hmgiy; MGC102580; AL023995; HMGY; HMGI(Y); Hmga1a; HMG-I(Y); Hmgi; Hmga1b
ILMN_2725429	Lsm10	341.709	256.313	492.136	385.022	371.064	271.534	0.750093	0.78235	1	0.731771	Mus musculus U7 snRNP-specific Sm-like protein LSM10 (Lsm10), mRNA,
ILMN_3122427	Suclg2	448.978	371.599	1044.75	1016.8	852.694	623.99	0.827655	0.973241	1	0.731786	Mus musculus succinate-Coenzyme A ligase, GDP-forming, beta subunit (Suclg2), mRNA,	D6Wsu120e; MGC91183; AF171077; AW556404
ILMN_1232532	Rnf220	56.3128	56.1274	109.07	122.392	73.6301	53.8981	0.996707	1.12214	1	0.732012	Mus musculus ring finger protein 220 (Rnf220), mRNA,	4732477A13; 5730503K05Rik; AV302541
ILMN_2602435	Tjap1	29.1245	29.5736	34.8513	29.2195	32.416	23.735	1.01542	0.838404	1	0.7322	Mus musculus tight junction associated protein 1 (Tjap1), mRNA,	AW121008; AI415281; 0610041D19Rik; Pilt; Tjp4
ILMN_2845839	1700065O13Rik	43.4986	45.7249	113.533	157.195	64.04	46.8972	1.05118	1.38457	1	0.732311	Mus musculus RIKEN cDNA 1700065O13 gene (1700065O13Rik), mRNA,	AI839635
ILMN_2749937	Ncoa6	59.3617	50.643	76.6082	69.3813	90.6256	66.3723	0.853125	0.905664	1	0.732379	Mus musculus nuclear receptor coactivator 6 (Ncoa6), mRNA,	AIB3; mKIAA0181; ASC2; ASC-2; RAP250; Ncoa7; PRIP; NRC; MGC90663
ILMN_2603412	Entpd6	34.4322	36.8567	70.9809	74.0823	38.7699	28.3958	1.07041	1.04369	1	0.732418	Mus musculus ectonucleoside triphosphate diphosphohydrolase 6 (Entpd6), mRNA,	Cd39l2; NTPDase-6; 2700026H11Rik
ILMN_2888742	Ntan1	260.332	279.164	410.383	490.713	310.557	227.529	1.07234	1.19574	1	0.732648	Mus musculus N-terminal Asn amidase (Ntan1), mRNA,
ILMN_1216813	2310003L22Rik	49.4933	38.1713	145.705	93.4245	67.492	49.4617	0.771241	0.641189	1	0.732853	Mus musculus RIKEN cDNA 2310003L22 gene (2310003L22Rik), mRNA,
ILMN_2935979	Cep63	43.2491	53.2405	110.169	108.846	63.9719	46.8892	1.23102	0.987993	1	0.732965	Mus musculus centrosomal protein 63 (Cep63), mRNA,	D9Mgc48e; AL450317,13gm1; D9Mgc41; ET2; CD20R; 4921501M07
ILMN_2704024	EG229862	29.5082	25.0311	29.9651	27.422	28.6398	21.0073	0.848276	0.915131	1	0.733499	Mus musculus predicted gene, EG229862 (EG229862), mRNA,	9230109N16
ILMN_1241481	Arfgap2	215.096	229.625	298.229	288.153	165.204	121.22	1.06755	0.966212	1	0.733759	Mus musculus ADP-ribosylation factor GTPase activating protein 2 (Arfgap2), mRNA,	2310032E02Rik
ILMN_3105117	1200011M11Rik	41.5878	40.325	60.1801	57.0552	43.6139	32.0059	0.969636	0.948073	1	0.733846	Mus musculus RIKEN cDNA 1200011M11 gene (1200011M11Rik), mRNA,	RP23-352L3,2
ILMN_2613389	Dph2	43.1809	41.167	80.4202	48.5122	62.2556	45.6887	0.953363	0.603235	1	0.733889	Mus musculus DPH2 homolog (S, cerevisiae) (Dph2), mRNA,	9130020C19Rik; Dph2l2; AI467389
ILMN_1222803	Hspa9	1952.67	1149.08	4217.93	2322.56	1906.8	1399.43	0.588465	0.550641	1	0.733916	Mus musculus heat shock protein 9 (Hspa9), mRNA,	GRP75; mot-2; PBP74; Hspa9a; Hsp74; mthsp70; CSA; Hsc74; mot2; Hsp74a; mortalin; 74kDa
ILMN_1249242	Dnajc2	1148.53	549.796	2284.37	778.171	822.693	604.024	0.478694	0.34065	1	0.734203	Mus musculus DnaJ (Hsp40) homolog, subfamily C, member 2 (Dnajc2), mRNA,	AU020218; Zrf1; Zrf2; MIDA1
ILMN_1259290	Akt3	71.7021	69.5754	95.8473	106.177	68.7851	50.5032	0.970339	1.10778	1	0.734216	Mus musculus thymoma viral proto-oncogene 3 (Akt3), mRNA,	AI851531; D930002M15Rik
ILMN_2962840	Cct6a	3006.8	2016.41	7954.18	4606.97	3629.99	2665.2	0.670618	0.579188	1	0.734217	Mus musculus chaperonin containing Tcp1, subunit 6a (zeta) (Cct6a), mRNA,	Cctz-1; Cct6
ILMN_2769133	Rbm4	195.6	211.503	217.219	193.971	206.005	151.259	1.0813	0.892974	1	0.734249	Mus musculus RNA binding motif protein 4 (Rbm4), mRNA,	Lark1; Rbm4a; 4921506I22Rik; Mlark; lark
ILMN_1225520	2310008H09Rik	496.425	440.582	753.204	477.523	298.21	218.991	0.88751	0.633989	1	0.734352	Mus musculus RIKEN cDNA 2310008H09 gene (2310008H09Rik), mRNA,	Tsg118
ILMN_2497068	Zmynd11	84.8576	122.226	115.155	157.159	85.562	62.8441	1.44037	1.36477	1	0.734486	Mus musculus zinc finger, MYND domain containing 11 (Zmynd11), mRNA,	2210402G22Rik
ILMN_1239806	Rpa3	661.303	418.668	731.051	603.07	744.026	546.499	0.633096	0.824935	1	0.734515	Mus musculus replication protein A3 (Rpa3), mRNA,	C330026P08Rik; 14kDa
ILMN_2591814	Sfrs1	2947	2244.17	8107.56	4700.47	2995.83	2200.64	0.761511	0.579764	1	0.734566	Mus musculus splicing factor, arginine/serine-rich 1 (ASF/SF2) (Sfrs1), transcript variant 1, mRNA,	AI482334; Asf; 5730507C05Rik; Sf2; AW491331; 6330415C05Rik; 1110054N12Rik
ILMN_1228752	Isyna1	869.621	1039.49	1190.45	1260.52	429.602	315.59	1.19534	1.05886	1	0.734609	Mus musculus myo-inositol 1-phosphate synthase A1 (Isyna1), mRNA,	AU018670; 1300017C10Rik
ILMN_1259561	Prep	611.023	438.788	829.121	496.765	546.987	401.842	0.718121	0.599147	1	0.734646	Mus musculus prolyl endopeptidase (Prep), mRNA,	AI450383; PEP; D10Wsu136e; AI047692
ILMN_2972239	Pkn2	108.824	123.362	251.166	230.903	103.861	76.3085	1.1336	0.919327	1	0.734716	Mus musculus protein kinase N2 (Pkn2), mRNA,	6030436C20Rik; Prkcl2; Stk7; AI507382; PRK2
ILMN_1247099	Setd1a	294.965	330.078	224.314	143.891	224.383	164.876	1.11904	0.641472	1	0.734796	Mus musculus SET domain containing 1A (Setd1a), mRNA,	mNSC1; mKIAA0339; MGC55143; Nsccn1; BC010250
ILMN_2744478	Lrrc1	76.0187	126.711	118.369	153.133	80.5966	59.2228	1.66684	1.29369	1	0.734806	Mus musculus leucine rich repeat containing 1 (Lrrc1), mRNA,	KIAA4018; A430093J20Rik; mKIAA4018; MGC90936; AU016091; D030059I21
ILMN_2508595	Zfp35	107.639	95.2209	176.424	127.738	96.6526	71.0222	0.884636	0.72404	1	0.73482	Mus musculus zinc finger protein 35 (Zfp35), mRNA,	mszf20-1; mszf68; mszf13; mszf28; Zfp-35
ILMN_2515363	Tpm4	609.246	254.974	1426.88	641.798	925.34	680.097	0.418507	0.44979	1	0.73497	Mus musculus tropomyosin 4 (Tpm4), mRNA,
ILMN_2635437	Tcf20	89.3774	91.7561	115.394	84.2108	108.538	79.7906	1.02661	0.729769	1	0.735144	Mus musculus transcription factor 20 (Tcf20), mRNA,	2810438H08Rik; mKIAA0292; SPBP
ILMN_2524043	Wdr75	170.712	115.315	516.58	270.167	221.607	162.957	0.675497	0.522992	1	0.735342	Mus musculus WD repeat domain 75 (Wdr75), mRNA, XM_899942 XM_899949 XM_905443 XM_919350 XM_919365 XM_919374 XM_919385 XM_919393 XM_919402	FLJ12545; 1300003A18Rik; MGC143988; C77608; 2410118I19Rik
ILMN_2641269	AA536717	61.1973	51.0971	102.066	120.137	72.3685	53.2168	0.834957	1.17705	1	0.735359	Mus musculus expressed sequence AA536717 (AA536717), transcript variant 2, mRNA,	mKIAA0974; MGC32264
ILMN_1241606	LOC100047393	492.687	469.553	1154.69	1145.79	586.557	431.348	0.953044	0.992294	1	0.73539	PREDICTED: Mus musculus similar to Amyloid beta precursor protein binding protein 1 (LOC100047393), mRNA,
ILMN_3156343	Wars	129.756	101.896	185.853	99.1451	105.924	77.8966	0.785292	0.533461	1	0.7354	Mus musculus tryptophanyl-tRNA synthetase (Wars), mRNA,	WRS
ILMN_3151345	Eif5	2668.76	2546.8	5561.64	4989.98	2789.46	2051.56	0.954301	0.897215	1	0.735466	Mus musculus eukaryotic translation initiation factor 5 (Eif5), transcript variant 1, mRNA,	D12Ertd549e; MGC36509; MGC36374; 2810011H21Rik
ILMN_2682945	Psmd2	43.6859	41.2923	104.568	119.077	44.9657	33.0803	0.945208	1.13875	1	0.735678	Mus musculus proteasome (prosome, macropain) 26S subunit, non-ATPase, 2 (Psmd2), mRNA,	Tex190; AA407121; TEG-190; 9430095H01Rik
ILMN_2659739	Il7r	32.3833	27.3874	37.5528	24.112	28.2744	20.8015	0.845726	0.642083	1	0.7357	Mus musculus interleukin 7 receptor (Il7r), mRNA,	IL-7Ralpha; CD127; MGC107557
ILMN_2870549	Dnajc3	80.4112	69.0133	174.14	187.993	97.9987	72.1117	0.858254	1.07955	1	0.735844	Mus musculus DnaJ (Hsp40) homolog, subfamily C, member 3 (Dnajc3), mRNA,	MGC6474; mp58; AU067833; Dnajc3b; Prkri; p58; p58IPK; Dnajc3; AA408985
ILMN_1242852	Wdr45l	97.6923	113.216	192.418	166.363	101.278	74.5418	1.1589	0.864589	1	0.736013	Mus musculus Wdr45 like (Wdr45l), mRNA,	D16Bwg0193e; AA408735; 0610008N23Rik
ILMN_2865726	Gdpd2	31.7548	24.4515	34.7344	33.1469	29.9596	22.0532	0.770008	0.954295	1	0.736096	Mus musculus glycerophosphodiester phosphodiesterase domain containing 2 (Gdpd2), mRNA,	9130017L10Rik; Gde3; Obdpf
ILMN_1236700	Pde4d	42.4941	32.0066	46.8394	32.5768	38.922	28.657	0.753201	0.6955	1	0.736268	Mus musculus phosphodiesterase 4D, cAMP specific (Pde4d), mRNA,	Dpde3; 9630011N22Rik
ILMN_2591651	A330080J22Rik	37.3207	43.3537	66.4244	73.9041	44.5087	32.771	1.16165	1.1126	1	0.736283
ILMN_2704199	Snip1	121.619	104.346	315.191	234.343	167.938	123.664	0.857974	0.743495	1	0.73637	Mus musculus Smad nuclear interacting protein 1 (Snip1), mRNA,	2410133M08Rik
ILMN_2611821	Ppp2ca	2021.02	1852.1	4805.57	5638.59	2642.28	1945.83	0.916419	1.17334	1	0.736422	Mus musculus protein phosphatase 2 (formerly 2A), catalytic subunit, alpha isoform (Ppp2ca), mRNA,	R75353
ILMN_3022492	Nfic	31.3343	30.3383	23.4293	28.3991	25.5337	18.8112	0.968214	1.21212	1	0.736721	Mus musculus nuclear factor I/C (Nfic), transcript variant 1, mRNA,	NF1-C; AA589446; 1500041O16Rik; 1110019L22Rik; AI746521
ILMN_2873220	Olfr1502	25.1173	25.0502	24.1328	26.7027	25.867	19.0586	0.997329	1.10649	1	0.736791	Mus musculus olfactory receptor 1502 (Olfr1502), mRNA,	MOR211-1; MGC123715; MGC123714
ILMN_3154007	Copg	42.5323	46.3571	116.747	112.55	59.9661	44.1851	1.08993	0.964051	1	0.736834	Mus musculus coatomer protein complex, subunit gamma (Copg), transcript variant 2, mRNA,	MGC66965; AU019265; BC056168; D6Wsu16e; Copg1; D6Ertd71e
ILMN_2980331	Sumo2	1932.6	1361.85	5476.93	3802.17	3062.77	2256.92	0.70467	0.694215	1	0.736888	Mus musculus SMT3 suppressor of mif two 3 homolog 2 (yeast) (Sumo2), mRNA,	Smt3h2; SUMO-2; Smt3b
ILMN_2746000	Ahsa2	73.5073	74.0346	147.928	122.64	79.036	58.2446	1.00717	0.829048	1	0.736937	Mus musculus AHA1, activator of heat shock protein ATPase homolog 2 (yeast) (Ahsa2), mRNA,	RP23-188K3,2; 1110064P04Rik; AI450991; FLJ36626
ILMN_2831491	Pwp2	302.287	210.853	377.074	180.362	233.82	172.319	0.697525	0.478322	1	0.736972	Mus musculus PWP2 periodic tryptophan protein homolog (yeast) (Pwp2), mRNA,	6530411D08Rik; Pwp2h; MGC117973; wdp103
ILMN_3095257	2410127L17Rik	58.7011	53.4948	275.561	214.415	101.924	75.1154	0.911308	0.778105	1	0.736974	Mus musculus RIKEN cDNA 2410127L17 gene (2410127L17Rik), mRNA,
ILMN_1254215	Tcta	29.7107	29.6529	28.4204	35.0007	30.6857	22.616	0.998054	1.23154	1	0.737018
ILMN_2934533	Prpf19	740.329	561.089	775.204	582.577	661.561	487.588	0.757891	0.751514	1	0.737027	Mus musculus PRP19/PSO4 pre-mRNA processing factor 19 homolog (S, cerevisiae) (Prpf19), mRNA,	Snev; prp19 beta; D19Wsu55e; Prp19; PSO4; NMP200; AA617263; AL024362
ILMN_2833772	Ppp5c	159.636	121.576	459.149	275.625	185.155	136.5	0.761578	0.600295	1	0.737221	Mus musculus protein phosphatase 5, catalytic subunit (Ppp5c), mRNA,	PP5; AU020526
ILMN_2833786	Chchd2	36.07	27.53	46.4637	36.7084	47.7155	35.1771	0.763239	0.790043	1	0.737226	Mus musculus coiled-coil-helix-coiled-coil-helix domain containing 2 (Chchd2), mRNA,	MGC103085; AL033347; Etohi6
ILMN_2615170	Acad8	38.2632	35.3046	90.0981	109.702	64.9831	47.9082	0.922676	1.21758	1	0.737241	Mus musculus acyl-Coenzyme A dehydrogenase family, member 8 (Acad8), mRNA,	AI786953; 2310016C19Rik
ILMN_1233531	2610528E23Rik	300.513	229.932	486.797	293.019	279.639	206.21	0.765131	0.601933	1	0.737415	Mus musculus RIKEN cDNA 2610528E23 gene (2610528E23Rik), mRNA,	AV122629; AV099812; 4930572F24Rik; 1110001A06Rik
ILMN_2744245	Wwp2	33.5838	30.3658	49.9252	33.9936	35.3152	26.0437	0.904182	0.680891	1	0.737463	Mus musculus WW domain containing E3 ubiquitin protein ligase 2 (Wwp2), mRNA,	AA690238; 1300010O06Rik; AIP2; AW554328
ILMN_2523256	1500001M20Rik	906.521	534.666	1815.4	928.708	781.138	576.087	0.5898	0.511573	1	0.737497	Mus musculus RIKEN cDNA 1500001M20 gene (1500001M20Rik), mRNA,
ILMN_2805714	B3galnt1	26.2531	26.267	23.596	27.2051	25.5691	18.8572	1.00053	1.15295	1	0.7375	Mus musculus UDP-GalNAc:betaGlcNAc beta 1,3-galactosaminyltransferase, polypeptide 1 (B3galnt1), mRNA,	b3GT3; B3galt3
ILMN_1219921	Nsun5	339.714	285.297	427.213	197.57	272.037	200.63	0.839813	0.462462	1	0.737509	Mus musculus NOL1/NOP2/Sun domain family, member 5 (Nsun5), mRNA,	Wbscr20; AI326939; Nol1r; 9830109N13Rik; Wbscr20a
ILMN_2613469	Psmb5	2540.02	1942.4	4122.5	3302.71	2456.96	1812.39	0.764717	0.801142	1	0.737653	Mus musculus proteasome (prosome, macropain) subunit, beta type 5 (Psmb5), mRNA,	MGC118075
ILMN_2752431	Itpka	53.3094	61.1213	50.7759	50.8235	46.5986	34.374	1.14654	1.00094	1	0.73766
ILMN_1249579	Top3a	57.6385	58.0551	43.746	32.5334	43.005	31.7252	1.00723	0.743687	1	0.73771	Mus musculus topoisomerase (DNA) III alpha (Top3a), mRNA,	MGC106383
ILMN_1242772	Adal	56.9793	75.3259	150.909	172.927	74.9736	55.3277	1.32199	1.1459	1	0.737962	Mus musculus adenosine deaminase-like (Adal), mRNA, XM_900859 XM_900862 XM_917792 XM_925262 XM_925265 XM_925269 XM_925272 XM_925275 XM_986097 XM_986134 XM_986169 XM_986201 XM_986236 XM_986298	MGC62428; 4930578F03Rik; MGC63264
ILMN_3068197	Slc12a2	26.136	26.3581	28.8319	30.6991	27.2299	20.0952	1.0085	1.06476	1	0.737985	Mus musculus solute carrier family 12, member 2 (Slc12a2), mRNA,	sy-ns; Nkcc1; mBSC2
ILMN_2801746	Chchd6	243.78	168.785	284.931	216.048	219.808	162.216	0.692363	0.758248	1	0.737989	Mus musculus coiled-coil-helix-coiled-coil-helix domain containing 6 (Chchd6), mRNA,	1700021B03Rik; 0710001P09Rik
ILMN_1254996	Usp45	91.6677	111.585	112.893	76	60.9523	44.9911	1.21728	0.673204	1	0.738136	Mus musculus ubiquitin specific petidase 45 (Usp45), mRNA, XM_920449 XM_920458	AI843191; 3110003C05Rik; Gcap7; RP23-38K18,3; 4930550B20Rik
ILMN_2931779	Wdr45l	304.214	283.885	492.778	405.521	342.399	252.769	0.933174	0.822928	1	0.738231	Mus musculus Wdr45 like (Wdr45l), mRNA,	AA408735; 0610008N23Rik; D16Bwg0193e
ILMN_1226035	Tbc1d20	168.809	268.391	175.28	266.388	111.695	82.4597	1.58991	1.51979	1	0.738255	Mus musculus TBC1 domain family, member 20 (Tbc1d20), mRNA,	AI414693; 2810442O16Rik; 1110028I04Rik
ILMN_2721149	Arl11	46.0284	24.2662	63.4272	26.5732	30.3682	22.4206	0.5272	0.418956	1	0.738292	Mus musculus ADP-ribosylation factor-like 11 (Arl11), mRNA,	ARLTS1; C730007L20Rik
ILMN_2704993	Dscr3	27.256	24.3658	48.4443	37.5327	30.3464	22.4051	0.893961	0.774761	1	0.738313	Mus musculus Down syndrome critical region gene 3 (Dscr3), mRNA,	AW538125; Dcra; MGC5833
ILMN_3114365	Txnl4a	906.085	634.653	1566.65	1495.19	1269.82	937.581	0.700434	0.954384	1	0.738357	Mus musculus thioredoxin-like 4A (Txnl4a), transcript variant 2, mRNA,	U5-15kDa; U5-15kD; D18Wsu98e; Dim1
ILMN_2623032	Epc1	161.447	233.5	285.216	512.604	177.698	131.214	1.44629	1.79725	1	0.738411	Mus musculus enhancer of polycomb homolog 1 (Drosophila) (Epc1), transcript variant 1, mRNA,	A930032N02Rik; 5730566F07Rik; 2400007E14Rik
ILMN_3019002	Fusip1	121.141	113.774	578.717	439.642	271.187	200.25	0.93919	0.759684	1	0.738423	Mus musculus FUS interacting protein (serine-arginine rich) 1 (Fusip1), transcript variant 2, mRNA,	NSSR2; Nssr; SRrp40; TASR; FUSIP2; NSSR1; TASR2; TASR1
ILMN_2792047	Fbxl15	60.2905	72.6604	57.3955	77.9268	50.0982	36.994	1.20517	1.35772	1	0.73843	Mus musculus F-box and leucine-rich repeat protein 15 (Fbxl15), mRNA,	0710008C12Rik; Fbxo37
ILMN_2655803	A730008L03Rik	127.913	126.637	160.236	170.112	179.077	132.26	0.990026	1.06163	1	0.738567	Mus musculus RIKEN cDNA A730008L03 gene (A730008L03Rik), mRNA,	Cobra1; AI663983; Nelf-b; AB041607
ILMN_2747886	Ndufb11	27.4531	31.6633	34.6067	34.8403	31.3227	23.1344	1.15336	1.00675	1	0.738581	Mus musculus NADH dehydrogenase (ubiquinone) 1 beta subcomplex, 11 (Ndufb11), mRNA,	D5Bwg0566e; NP15,6; D5Bwg0577e; Np15
ILMN_3158668	Pde6d	150.459	128.705	165.63	169.145	213.494	157.694	0.855412	1.02122	1	0.738636	Mus musculus phosphodiesterase 6D, cGMP-specific, rod, delta (Pde6d), mRNA,	AI841218
ILMN_2629591	Asah1	34.3792	40.8028	188.017	341.17	109.711	81.039	1.18684	1.81457	1	0.73866	Mus musculus N-acylsphingosine amidohydrolase 1 (Asah1), mRNA,	AC; 2310081N20Rik; AU044555; Asah; AL022942
ILMN_2756716	Nup160	379.547	271.837	924.623	429.201	467.43	345.294	0.716215	0.46419	1	0.738707	Mus musculus nucleoporin 160 (Nup160), mRNA,	KIAA0197; Gtl-13; 160kDa; Gtl1-13; mKIAA0197; Gtl13; AA414952; AU020188; 2810011M03Rik
ILMN_2752569	Paip1	51.5038	49.7031	102.368	113.81	57.9932	42.8547	0.965038	1.11178	1	0.738961	Mus musculus polyadenylate binding protein-interacting protein 1 (Paip1), transcript variant 1, mRNA,
ILMN_2833152	9530077C05Rik	73.0265	66.6328	59.16	55.5514	60.8089	44.936	0.912447	0.939003	1	0.738971	Mus musculus RIKEN cDNA 9530077C05 gene (9530077C05Rik), mRNA,	1110003N12Rik; KIAA0895; mKIAA0895
ILMN_2998395	Zfp523	362.522	505.404	588.513	1032.47	456.005	337.018	1.39413	1.75438	1	0.739067	Mus musculus zinc finger protein 523 (Zfp523), mRNA,	2810027J07; MGC66570; MGC79196; BC025615
ILMN_2972459	Diap1	52.7607	58.4113	56.2696	61.005	47.7293	35.279	1.1071	1.08416	1	0.739146	Mus musculus diaphanous homolog 1 (Drosophila) (Diap1), mRNA,	D18Wsu154e; Dia1; KIAA4062; Drf1; p140mDia; mKIAA4062
ILMN_2641613	Smarcc1	165.865	161.395	318.699	238.107	311.257	230.138	0.973048	0.747122	1	0.739382	Mus musculus SWI/SNF related, matrix associated, actin dependent regulator of chromatin, subfamily c, member 1 (Smarcc1), mRNA,	BAF155; AI115498; Rsc8; SRG3
ILMN_1248041	Rock2	34.3038	47.6429	85.8853	89.0481	39.399	29.1314	1.38885	1.03683	1	0.739395	Mus musculus Rho-associated coiled-coil containing protein kinase 2 (Rock2), mRNA,	Rho-kinase; mKIAA0619; ROKalpha; B230113H15Rik; Rock-II
ILMN_2853409	Arfgap2	261.944	276.134	266.981	280.899	208.434	154.115	1.05417	1.05213	1	0.739398	Mus musculus ADP-ribosylation factor GTPase activating protein 2 (Arfgap2), mRNA,	2310032E02Rik
ILMN_2751215	Tor1aip1	175.283	132.71	237.262	231.893	118.785	87.8396	0.757118	0.977373	1	0.739484	Mus musculus torsin A interacting protein 1 (Tor1aip1), mRNA,	MGC6357; LAP1; Lap1B
ILMN_2724795	Ppp5c	424.473	306.138	484.296	306.662	382.87	283.152	0.721219	0.633213	1	0.739551	Mus musculus protein phosphatase 5, catalytic subunit (Ppp5c), mRNA,	PP5; AU020526
ILMN_2924969	Gm1943	47.0006	54.0801	60.0649	82.7904	49.9175	36.917	1.15063	1.37835	1	0.739561	Mus musculus gene model 1943, (NCBI) (Gm1943), non-coding RNA,
ILMN_1259566	St6galnac4	129.595	70.5024	276.093	152.882	107.403	79.4314	0.544021	0.553733	1	0.739562	Mus musculus ST6 (alpha-N-acetyl-neuraminyl-2,3-beta-galactosyl-1, 3)-N-acetylgalactosaminide alpha-2,6-sialyltransferase 4 (St6galnac4), mRNA,	MGC102103; Siat7d
ILMN_2453086	Txnrd3	76.2938	67.2896	130.071	103.048	87.6847	64.8537	0.88198	0.792246	1	0.739624	Mus musculus thioredoxin reductase 3 (Txnrd3), mRNA,	AI196535; Tgr; TR2
ILMN_1246126	Mtmr2	43.1124	53.3433	144.546	133.068	61.6423	45.5924	1.23731	0.920588	1	0.739629	Mus musculus myotubularin related protein 2 (Mtmr2), mRNA,	6030445P13Rik
ILMN_2753524	2410002F23Rik	34.6148	38.2438	39.0439	43.0418	36.5817	27.0576	1.10484	1.10239	1	0.739647	Mus musculus RIKEN cDNA 2410002F23 gene (2410002F23Rik), mRNA,
ILMN_2863965	Pfn1	769.75	801.513	821.918	761.383	881.772	652.326	1.04126	0.92635	1	0.73979	Mus musculus profilin 1 (Pfn1), mRNA,	Pfn
ILMN_2488125	Vrk1	35.547	40.5147	55.5841	39.9428	36.4012	26.9335	1.13975	0.7186	1	0.739907	Mus musculus vaccinia related kinase 1 (Vrk1), transcript variant 1, mRNA,	51PK
ILMN_2984969	Phf23	47.8506	49.1	80.2393	58.1485	48.6389	35.9887	1.02611	0.724689	1	0.739917	Mus musculus PHD finger protein 23 (Phf23), mRNA,	RP23-172M21,13; JUNE-1; 2410141M05Rik
ILMN_2737310	Mipep	23.8625	24.5082	27.4809	21.6634	26.0571	19.2808	1.02706	0.788309	1	0.739945	Mus musculus mitochondrial intermediate peptidase (Mipep), mRNA,	5730405E07Rik
ILMN_2780759	Pknox1	151.17	190.058	303.756	422.599	277.084	205.042	1.25725	1.39124	1	0.739999	Mus musculus Pbx/knotted 1 homeobox (Pknox1), mRNA,	D17Wsu76e; PREP1
ILMN_2502053	AA517853	31.5936	26.5778	23.5611	22.8612	28.4602	21.0614	0.84124	0.970294	1	0.74003
[truncated: 23,702 more rows]

## Sheet: JQ1
PROBE_ID	SYMBOL	Rel JQ1	PROBE_ID	SYMBOL	Rel JQ1
ILMN_1236111	Fcrla	0.0143113	ILMN_1236312	Snx14	2.00033
ILMN_2703829	Fcrla	0.018202	ILMN_2653265	H2-Ke6	2.00091
ILMN_2971171	Fcrla	0.0197383	ILMN_1233759	Asph	2.00451
ILMN_1221820	Faim3	0.0309171	ILMN_2712044	Bcl11a	2.00471
ILMN_2441534	Rsph1	0.0313557	ILMN_2597030	Smox	2.00527
ILMN_3009860	Sell	0.0576205	ILMN_1224034	Pde1b	2.00746
ILMN_3159170	Cd22	0.0651567	ILMN_2972829	Psg23	2.00984
ILMN_1235934	Btk	0.0693937	ILMN_1232524	Hist1h4i	2.00989
ILMN_2469253	Vpreb3	0.0710731	ILMN_2932539	Ring1	2.01029
ILMN_1243451	Hvcn1	0.0856884	ILMN_2686603	LOC100046406	2.01229
ILMN_1229840	Fcrla	0.087195	ILMN_1237241	Araf	2.0152
ILMN_2743013	Ncf4	0.105231	ILMN_1235196	Atp10d	2.0153
ILMN_2910934	Cd52	0.106547	ILMN_2971286	Ppp3ca	2.01709
ILMN_2704257	Reln	0.119267	ILMN_1244993	Azi1	2.02001
ILMN_3124528	Hvcn1	0.132468	ILMN_2655005	Wnk1	2.02372
ILMN_2610744	Myl4	0.13867	ILMN_1228629	Zfp704	2.02496
ILMN_2834294	6330442E10Rik	0.140787	ILMN_2781353	Ush2a	2.02631
ILMN_1221913	Cd22	0.154522	ILMN_2685921	Chrnb1	2.02727
ILMN_2638491	Slamf7	0.156051	ILMN_2447456	Utx	2.02781
ILMN_2690460	Jakmip1	0.162585	ILMN_1213026	9630058J23Rik	2.0285
ILMN_2603647	Clec2d	0.162879	ILMN_1242674	Cdkl2	2.02861
ILMN_1257631	Apobec1	0.168115	ILMN_2636403	Axud1	2.02887
ILMN_2759365	Angptl4	0.173189	ILMN_2822160	BC030499	2.02915
ILMN_2950622	Arhgdig	0.182949	ILMN_2687854	1300018J18Rik	2.02968
ILMN_2612125	Arhgef18	0.187191	ILMN_2674483	Gpx2	2.03177
ILMN_1228657	Fcgr2b	0.189521	ILMN_2874554	Aldh4a1	2.03194
ILMN_3089584	Cd74	0.190282	ILMN_2907370	Optn	2.03233
ILMN_2705655	1700030K09Rik	0.196412	ILMN_1218413	Rnf19a	2.03267
ILMN_1221817	Cd74	0.198735	ILMN_2876775	Pcbd2	2.03283
ILMN_2732757	9830002I17Rik	0.200131	ILMN_2829330	Hexb	2.03438
ILMN_2628178	Socs2	0.207432	ILMN_2600113	Gtpbp2	2.03519
ILMN_1231573	Serpinb1a	0.209396	ILMN_2716085	Pex6	2.0367
ILMN_2752873	Lgals9	0.21101	ILMN_1220697	Notch4	2.03734
ILMN_2663249	Slamf9	0.21214	ILMN_2756435	Cebpb	2.04168
ILMN_1216136	Cbfa2t3h	0.212279	ILMN_2463979	Twsg1	2.04338
ILMN_2864170	Chst3	0.21273	ILMN_2618526	Napepld	2.04516
ILMN_2933887	1200013B08Rik	0.21582	ILMN_1219459	2010005J08Rik	2.04531
ILMN_2661523	Cd79b	0.217992	ILMN_2942492	Rbm5	2.0469
ILMN_1236009	Camk2b	0.218178	ILMN_3148662	Sfrs5	2.04729
ILMN_1222471	Gmfg	0.222648	ILMN_2723826	Slc7a7	2.04812
ILMN_2610822	Cd79b	0.223079	ILMN_2764865	Oma1	2.05015
ILMN_1254786	Ech1	0.224421	ILMN_2591056	Pigl	2.05197
ILMN_2765032	Kcnn4	0.231184	ILMN_1244123	Slc38a2	2.05369
ILMN_2657867	Napsa	0.231214	ILMN_2730803	Mpnd	2.05545
ILMN_2593944	4922502D21Rik	0.234192	ILMN_1250750	Rnf113a2	2.05628
ILMN_1227907	Gmfg	0.240253	ILMN_2822477	Ppnr	2.05665
ILMN_2671738	Il16	0.242256	ILMN_2648742	Abcb4	2.057
ILMN_2919850	Lrmp	0.24268	ILMN_3103784	1700023B02Rik	2.0573
ILMN_3160369	Atg9b	0.245319	ILMN_2419138	Vcl	2.05846
ILMN_2914843	Psmb10	0.245511	ILMN_2619836	2310039H08Rik	2.06048
ILMN_2819558	Bach2	0.247654	ILMN_2622997	Sesn3	2.06119
ILMN_2650008	Lgr5	0.249241	ILMN_1228475	Ulk1	2.06168
ILMN_1214118	Plekha2	0.249545	ILMN_2643377	Slc24a6	2.06255
ILMN_3127790	Ikzf1	0.249701	ILMN_2911520	Hexdc	2.06293
ILMN_2757870	Psmb10	0.251119	ILMN_3149680	Fbxl12	2.06341
ILMN_1258357	Dok3	0.254922	ILMN_1247682	Atp6v0a1	2.0637
ILMN_2864172	Chst3	0.254998	ILMN_2742420	Spg7	2.06494
ILMN_2772155	LOC100045780	0.259595	ILMN_1249684	LOC100045019	2.06541
ILMN_2987709	Slc15a3	0.262702	ILMN_2676243	Hist1h2be	2.06705
ILMN_2511953	Tnfaip8	0.263322	ILMN_1224129	Dennd3	2.06729
ILMN_1250001	4930583H14Rik	0.263859	ILMN_2728830	Taf13	2.06785
ILMN_2657478	Cd53	0.264225	ILMN_2927565	Pkp2	2.0693
ILMN_3131478	Bcat1	0.26442	ILMN_1377918	LOC100048105	2.07008
ILMN_3120510	Gvin1	0.264446	ILMN_2679937	LOC100046056	2.07093
ILMN_3079919	Ahnak	0.265144	ILMN_1251876	Srpk2	2.07274
ILMN_2627566	Capn5	0.265158	ILMN_1226186	Birc2	2.07407
ILMN_2716602	Lgals9	0.265491	ILMN_2724585	Dag1	2.0747
ILMN_2701515	Lrrk1	0.266502	ILMN_3030470	1700023B02Rik	2.07633
ILMN_2896768	Cbr3	0.267393	ILMN_2900484	Trim72	2.077
ILMN_2670690	H2-Ob	0.27104	ILMN_2997002	Pigo	2.07768
ILMN_2729263	Coq7	0.272773	ILMN_2620145	Plcd3	2.07889
ILMN_2595842	Def6	0.278139	ILMN_3070533	5930434B04Rik	2.07979
ILMN_2649392	Fermt3	0.278455	ILMN_3144984	Arl4a	2.08276
ILMN_1226829	Cd93	0.28816	ILMN_1221852	Tmem118	2.08806
ILMN_3102376	Fcgr2b	0.28856	ILMN_2666380	Spag1	2.08941
ILMN_2855334	Gusb	0.28903	ILMN_2765080	Nub1	2.09009
ILMN_2623699	Irf4	0.292013	ILMN_1224093	Llgl2	2.0909
ILMN_2681186	Rab7l1	0.296887	ILMN_3160568	Ankrd50	2.09259
ILMN_2608811	Cbr3	0.299146	ILMN_2635516	Phf12	2.09609
ILMN_1230302	Napsa	0.30412	ILMN_2711355	Dmwd	2.09803
ILMN_2630641	Srm	0.305714	ILMN_1220072	Zcchc6	2.0995
ILMN_1228404	Sh2d2a	0.306978	ILMN_2622983	Dusp1	2.09996
ILMN_2764580	Parvg	0.30921	ILMN_2780205	Ctnna1	2.10093
ILMN_1214866	Eml1	0.311031	ILMN_2902492	AB112350	2.10262
ILMN_1246734	Osbp2	0.31272	ILMN_2788475	Stxbp4	2.10284
ILMN_2719803	Stap1	0.313542	ILMN_1251426	Klf7	2.10574
ILMN_1247811	Ass1	0.314745	ILMN_2666279	Arrdc3	2.1113
ILMN_2781030	Napsa	0.31764	ILMN_2604263	8430410A17Rik	2.11195
ILMN_2672325	LOC100046163	0.319891	ILMN_2608184	Il6st	2.11264
ILMN_2687602	Pou2f2	0.321991	ILMN_2686069	Gyg	2.1129
ILMN_1236932	Ralyl	0.323044	ILMN_2649172	Zcchc18	2.11736
ILMN_1214450	Qrsl1	0.325722	ILMN_2944576	Pex6	2.11953
ILMN_2673121	Sigirr	0.325741	ILMN_2733753	2310005E10Rik	2.12043
ILMN_1224855	Samd9l	0.326452	ILMN_2670778	Kif1b	2.12127
ILMN_3100042	Btrc	0.337377	ILMN_1248555	Gns	2.1216
ILMN_2935237	1700027N10Rik	0.339082	ILMN_2740407	Pde2a	2.12192
ILMN_1218358	Gypc	0.340231	ILMN_1230273	Xpc	2.12514
ILMN_1249313	Rabl3	0.340538	ILMN_1254966	Rbms1	2.12891
ILMN_1220996	Ptpn6	0.341628	ILMN_2644664	Cdc2l6	2.12971
ILMN_2960325	Ctse	0.342002	ILMN_1215212	Rhob	2.13199
ILMN_2733793	Coro1a	0.342971	ILMN_2750011	Galnt10	2.132
ILMN_2747060	Coro1a	0.345593	ILMN_2997923	Apoa1bp	2.13419
ILMN_1259400	ENSMUSG00000043795	0.345937	ILMN_3026397	Chka	2.13761
ILMN_1226525	H2-Ab1	0.347181	ILMN_1251273	Pnpla8	2.13772
ILMN_2790382	Gfi1	0.347981	ILMN_2695035	Pja2	2.13905
ILMN_2994631	C230052I12Rik	0.34896	ILMN_2755021	Chkb	2.13957
ILMN_1249767	Thbd	0.349829	ILMN_2883990	Rbms1	2.14227
ILMN_1225880	Srm	0.354489	ILMN_3029727	Shf	2.14392
ILMN_3118707	Sla	0.35478	ILMN_1247267	Smox	2.14481
ILMN_1249765	Rexo2	0.355618	ILMN_2710139	Ppargc1a	2.14839
ILMN_2481170	Tnfrsf13c	0.356623	ILMN_3133748	Gab3	2.15084
ILMN_1232627	6330442E10Rik	0.358447	ILMN_2646209	Cdk10	2.15273
ILMN_2809611	Srm	0.358968	ILMN_2956932	Acadvl	2.15491
ILMN_3113420	Ptpn6	0.359952	ILMN_2638428	Cdkn1b	2.1556
ILMN_3065373	4930572J05Rik	0.3604	ILMN_2663613	Itgb5	2.15769
ILMN_1246266	LOC100047815	0.361138	ILMN_1240318	Slc7a7	2.16137
ILMN_1241225	Dctd	0.364404	ILMN_3099751	Prmt2	2.16143
ILMN_2787257	Coro1a	0.365953	ILMN_2606804	Alcam	2.16362
ILMN_2825020	Rassf5	0.368672	ILMN_2615854	Ddrgk1	2.16452
ILMN_1230587	Lpxn	0.36923	ILMN_2595973	Grn	2.16853
ILMN_2810405	Myo1g	0.369998	ILMN_2947234	Cbx7	2.16902
ILMN_1238109	Pp11r	0.372076	ILMN_2611450	Ift172	2.17133
ILMN_2891104	Tmco4	0.374372	ILMN_3105499	Dlgap4	2.17146
ILMN_3059859	Gm525	0.374986	ILMN_2853957	Dag1	2.17166
ILMN_2639642	Arhgef6	0.376145	ILMN_3058975	Fnta	2.17191
ILMN_2946466	Bin1	0.377148	ILMN_1254644	Spsb2	2.17382
ILMN_2693858	D14Ertd449e	0.377826	ILMN_2683794	Oaz2	2.17571
ILMN_1215550	Inppl1	0.377975	ILMN_2873793	Mapkbp1	2.17608
ILMN_2768026	Gusb	0.379865	ILMN_2719784	LOC100044566	2.1776
ILMN_2740268	Otub2	0.380119	ILMN_2728729	Sdc4	2.17938
ILMN_2609087	Mrpl40	0.381901	ILMN_2920752	Arhgef1	2.1821
ILMN_2687661	Mfng	0.381935	ILMN_2718645	Luzp1	2.18363
ILMN_2805071	Ap4s1	0.382435	ILMN_1244801	2410066E13Rik	2.18475
ILMN_2612255	Lyl1	0.383104	ILMN_1226528	Kctd2	2.18766
ILMN_2833985	Rilpl2	0.384129	ILMN_2994895	Wdr68	2.18818
ILMN_1227235	Timm10	0.384831	ILMN_2822141	Lyrm5	2.18986
ILMN_2975994	Cd19	0.385267	ILMN_2827036	Pkd1	2.19101
ILMN_2941324	Gsdmdc1	0.386584	ILMN_2473858	Ttc19	2.1918
ILMN_2733185	Cdc42ep3	0.386683	ILMN_2697174	Trrap	2.19401
ILMN_1232600	Rnf125	0.386806	ILMN_2661635	Gyg	2.19502
ILMN_2749037	Chchd10	0.386858	ILMN_2597899	Zfc3h1	2.1957
ILMN_2970879	Uchl3	0.387163	ILMN_2454788	Wbp1	2.19575
ILMN_2713969	B9d1	0.387991	ILMN_2678355	Amigo2	2.19978
ILMN_2620913	Inppl1	0.388275	ILMN_2727799	Trafd1	2.20119
ILMN_1250907	Mcm2	0.389569	ILMN_2949869	Ift88	2.20334
ILMN_1224713	Adap1	0.390167	ILMN_2630400	Tssk4	2.20617
ILMN_2674221	Tbc1d7	0.390525	ILMN_2938893	Smad3	2.2075
ILMN_2605890	Tk1	0.390894	ILMN_1254943	Gdpd5	2.20775
ILMN_2851040	Mcm3	0.392085	ILMN_1235324	2310066E14Rik	2.21131
ILMN_1216046	C230052I12Rik	0.392151	ILMN_2722938	Myd116	2.21142
ILMN_2988143	Plac8	0.395991	ILMN_1219978	Appl2	2.21303
ILMN_2632630	Neil1	0.396281	ILMN_3113437	Tmem2	2.21742
ILMN_1216871	Lcp1	0.396586	ILMN_2710705	Sqstm1	2.2179
ILMN_2652719	Ptprcap	0.398007	ILMN_2659229	Rpl22	2.22002
ILMN_2724785	Kcnab2	0.398597	ILMN_1220726	Satb1	2.2201
ILMN_3096933	Top1mt	0.399281	ILMN_2626773	Rbak	2.22276
ILMN_2917338	Rnf125	0.399953	ILMN_1227295	BC005537	2.23033
ILMN_2651137	Lck	0.400101	ILMN_2728379	Ivd	2.23075
ILMN_2707137	Phf17	0.4014	ILMN_1222196	2310007A19Rik	2.23127
ILMN_2671923	Ly86	0.401789	ILMN_1214486	Tk2	2.23182
ILMN_2499400	Vamp8	0.401909	ILMN_1222716	Sgcb	2.2321
ILMN_2601840	Phf19	0.403946	ILMN_3001481	Chrnb1	2.23431
ILMN_2606711	LOC100046163	0.40623	ILMN_1224487	Ddx26b	2.23742
ILMN_2685275	Tmem109	0.408089	ILMN_2920753	Arhgef1	2.24132
ILMN_2832641	Ndst1	0.408521	ILMN_2749448	Plekho2	2.24256
ILMN_2692341	Scrn2	0.409465	ILMN_1213573	5930434B04Rik	2.25001
ILMN_2470799	LOC100047579	0.40971	ILMN_2600309	Spg7	2.25236
ILMN_2837802	BC028528	0.410969	ILMN_1254547	Nr4a2	2.25339
ILMN_2678828	Eif5a	0.4121	ILMN_2760977	Impact	2.25614
ILMN_2817996	Ppa2	0.412619	ILMN_2731949	Klf6	2.25737
ILMN_2685133	1700034H14Rik	0.412737	ILMN_2896639	Abca7	2.25766
ILMN_2660837	St6galnac4	0.413105	ILMN_2665715	Gstt3	2.26581
ILMN_2661005	1110018G07Rik	0.413641	ILMN_1232621	Ank	2.26665
ILMN_1258578	Ahnak	0.413938	ILMN_1223395	Trafd1	2.26785
ILMN_2737903	Fgd2	0.415132	ILMN_2598374	Ccdc92	2.26931
ILMN_2533104	LOC233529	0.415268	ILMN_2751948	Hist2h2aa1	2.27093
ILMN_2750904	Lrriq2	0.415521	ILMN_1253093	Wasf1	2.27161
ILMN_2876560	Ino80e	0.415564	ILMN_2780519	St7l	2.27377
ILMN_1233889	Pno1	0.415835	ILMN_2470333	Usp3	2.27485
ILMN_2680827	Il7r	0.416091	ILMN_2623793	Zfhx3	2.27859
ILMN_1225373	C1qbp	0.416743	ILMN_2619574	Slc35e3	2.2799
ILMN_1258148	Inppl1	0.417057	ILMN_2799596	AI662250	2.2836
ILMN_2515363	Tpm4	0.418507	ILMN_2733887	Mknk2	2.28419
ILMN_2732877	1700034H14Rik	0.418963	ILMN_2784272	Ifngr2	2.28858
ILMN_2659762	Mrpl18	0.419326	ILMN_2990420	Jmjd2b	2.28985
ILMN_1242779	LOC100044103	0.421065	ILMN_2616309	Pttg1ip	2.29066
ILMN_1230765	Tpst1	0.422656	ILMN_2664129	Hist1h4h	2.29141
ILMN_2968032	2010003J03Rik	0.423835	ILMN_2807284	Dgat1	2.29746
ILMN_2707147	Rangrf	0.423912	ILMN_2936604	Zfp513	2.30514
ILMN_2767057	3110082I17Rik	0.424005	ILMN_2780424	Zfp36l1	2.30646
ILMN_2680770	Cysltr1	0.424012	ILMN_1228850	Ccnl1	2.30918
ILMN_1224635	Fkbp11	0.424047	ILMN_1234565	P4ha1	2.30944
ILMN_2616565	Slc2a3	0.424961	ILMN_2645090	St7l	2.31041
ILMN_2699488	Lamb2	0.42601	ILMN_1224936	Mapk1ip1	2.31361
ILMN_2698115	Ltv1	0.4272	ILMN_2625991	Akr7a5	2.32272
ILMN_2664686	Chaf1b	0.427712	ILMN_1227508	Stard5	2.32354
ILMN_2842338	Tbc1d10c	0.428354	ILMN_2963754	9430015G10Rik	2.32499
ILMN_2756550	Slc12a3	0.428478	ILMN_2699477	Abtb1	2.32575
ILMN_2640971	Pafah1b3	0.430098	ILMN_1256989	Hist1h4j	2.328
ILMN_2517041	Uhrf1	0.430508	ILMN_2677859	Insl6	2.33231
ILMN_1223045	2810417H13Rik	0.431217	ILMN_2642158	Atp5s	2.33512
ILMN_2637398	Rabl5	0.431336	ILMN_3161863	AI595366	2.33613
ILMN_2772380	Mrto4	0.432254	ILMN_2942276	Luzp1	2.33642
ILMN_2892222	Acsl5	0.432451	ILMN_3145331	Tmsb10	2.34222
ILMN_2681604	Ccdc23	0.432728	ILMN_1247343	Lmcd1	2.34567
ILMN_2614853	6720458F09Rik	0.433187	ILMN_2532865	Gm166	2.34664
ILMN_2711401	3200002M19Rik	0.434617	ILMN_2759598	Hint2	2.34953
ILMN_2705886	Scp2	0.43485	ILMN_2990616	Birc2	2.35701
ILMN_2645613	Cc2d1a	0.434894	ILMN_2757599	Sas	2.36047
ILMN_1214952	Cln3	0.434969	ILMN_1225674	Eps15l1	2.36248
ILMN_2602406	2810004N20Rik	0.435392	ILMN_1221703	Abca7	2.3678
ILMN_2750905	Lrriq2	0.435982	ILMN_2689880	Gstt2	2.37016
ILMN_1225544	Slc19a1	0.43662	ILMN_1224250	B230342M21Rik	2.37163
ILMN_1249864	A630077B13Rik	0.437441	ILMN_2696610	Slc25a37	2.37662
ILMN_2723438	Nubp2	0.437782	ILMN_2874128	2600009E05Rik	2.38104
ILMN_2656422	BC028528	0.437852	ILMN_1225035	Carhsp1	2.38131
ILMN_3029178	Fcgr2b	0.438141	ILMN_2914010	Dmwd	2.39291
ILMN_2608043	Hes6	0.439355	ILMN_2734181	Acss2	2.39393
ILMN_2748928	Gsdmdc1	0.441575	ILMN_2760183	Ppef2	2.39533
ILMN_2936427	Mcm4	0.442351	ILMN_2760765	BC021381	2.39556
ILMN_2756474	Amz1	0.442361	ILMN_2891245	Rhbdl2	2.39954
ILMN_2950957	Rtn4ip1	0.442621	ILMN_2759058	Rnf103	2.40728
ILMN_2741114	Gusb	0.443253	ILMN_3162618	Luc7l	2.41229
ILMN_1241696	Fbxw4	0.443463	ILMN_2646625	Jun	2.4124
ILMN_3093150	Npm3	0.444652	ILMN_2599782	Irf1	2.41349
ILMN_2809701	Emid1	0.444803	ILMN_1237132	AW549877	2.41617
ILMN_2690741	Btrc	0.445816	ILMN_1240074	Trim26	2.41993
ILMN_2662160	Impa2	0.446127	ILMN_3004386	Fzd6	2.42393
ILMN_2723788	Anp32e	0.44739	ILMN_1228320	Cfp	2.42443
ILMN_2636116	Pdcd5	0.448043	ILMN_1250929	Senp2	2.4276
ILMN_2821118	Ccr7	0.448417	ILMN_2867696	Cdc42bpb	2.43148
ILMN_3127381	Zfp239	0.44868	ILMN_2699531	Rgs10	2.43794
ILMN_1234223	Pld4	0.448824	ILMN_1213779	Atg2a	2.44029
ILMN_2791952	Hes6	0.448927	ILMN_2907540	Lmcd1	2.44606
ILMN_2624695	Chchd4	0.448978	ILMN_2977331	Mylpf	2.45286
ILMN_2933530	Ecd	0.449109	ILMN_2913989	AA407270	2.45358
ILMN_2714796	Coro1a	0.449248	ILMN_2418324	Usp54	2.45566
ILMN_2619861	Nipsnap1	0.450039	ILMN_2691567	Hyi	2.45821
ILMN_2736762	Ifrd2	0.451122	ILMN_2811263	Zxda	2.45923
ILMN_2898917	Otub2	0.451268	ILMN_1247553	Sepp1	2.46385
ILMN_2691298	Mrpl27	0.451269	ILMN_2630739	Phf20l1	2.46404
ILMN_2600678	Rac2	0.451982	ILMN_1236828	Usp20	2.46483
ILMN_2757268	Tbc1d7	0.452515	ILMN_2899599	Ddx3y	2.46656
ILMN_2594971	Rpl38	0.453196	ILMN_2708203	Cdkn1c	2.46943
ILMN_2742849	Mcm5	0.453721	ILMN_1224162	5730593F17Rik	2.47149
ILMN_2592909	BC024814	0.454251	ILMN_3154409	Brd2	2.47594
[truncated: 192 more rows]

## Sheet: HMBA
PROBE_ID	SYMBOL	Rel HMBA	PROBE_ID	SYMBOL	Rel HMBA
[truncated: 669 more rows]

[truncated: 1 more sheets: Vorino]
